# Supplementary material for: Genome-Wide Analysis of the Late Embryogenesis Abundant (LEA) and Abscisic Acid-, Stress-, and Ripening-Induced (ASR) Gene Superfamily from Canavalia rosea and Their Roles in Salinity/Alkaline and Drought Tolerance
Source: MDPI journal article supplement (doi:10.3390/ijms22094554), 2021-04-27
Supplement: s1 [file s1]

## Supplementary Materials Information

**Supplementary Materials Table S1.** The primer lists used in this study.

**Supplementary Materials Table S2.** The sequence information of all 84 *CrLEA* and 3 *CrASR* genes.

**Supplementary Materials Table S3.** The conserved motifs of the *CrLEA* proteins analyzed with MEME tool.

**Supplementary Materials Table S4.** The *cis*-regulatory elements identified in promoter regions of *CrLEAs* and *CrASRs*.

**Supplementary Materials Table S5.** The numbers of subfamilies of *LEA/ASR* genes in different legume species.

**Supplementary Materials Figure S1.** Predicted 3D models of *CrLEA* and *CrASR* proteins. Models were generated by using Phyre2 server at intensive mode. Models were visualized by rainbow color from N to C terminus and organized in order their subfamilies and names.

**Supplementary Materials Figure S2.** Predicted disorder profile plots of *CrLEA* and *CrASR* proteins by PrDOS (Protein DisOrder prediction System, <http://prdos.hgc.jp/cgi-bin/top.cgi>, accessed on 22 April 2021), with the false positive rate (FP) = 5%.

**Supplementary Materials Figure S3.** Phylogenetic tree of the plant *ASR* members. Three *CrASRs* were marked with symbol “▲”. The amino acid sequences of plant *ASRs* used were as follows: *SbASR-1* from *Salicornia brachiata* (NCBI accession no.: ACI15208.1); *SulASR* from *Suaeda liaotungensis* (NCBI accession no.: AGZ20206.1); *CqASR* from *Chenopodium quinoa* (NCBI accession no.: XP021737749.1); *IpASR* from *Ipomoea pes-caprae* (NCBI accession no.: AWW16497.1); tomato *ASRs* (NCBI accession no.: AAY97998.1 for *SIASR1*, AAP37982.1 for *SIASR2*, AAY98003.1 for *SIASR3*, AAY98032.1 for *SIASR4*, and XP\_004237807.1 for *SIASR5*); *OsASRs* from *Oryza sativa* (NCBI accession no.: BAG88534.1 for *OsASR1*, XP\_015635329.1 for *OsASR2*, BAG89007.1 for *OsASR3*, XP\_025880738.1 for *OsASR4*, BAG99580.1 for *OsASR5*, and BAG87564.1 for *OsASR6*); soybean *ASRs* (Phytozome locus name: Glyma.20G167500.1, Glyma.10G224300.1, and Glyma.16G166600.1), common bean *ASRs* (Phytozome locus name: Phvul.007G080400.1 and Phvul.004G094600.1); alfalfa *ASRs* (Phytozome locus name: Medtr6g037220.1, Medtr0583s0010.1, and Medtr1g098680.1), chickpea *ASRs* (Phytozome locus name: Ca\_04381, Ca\_25393, Ca\_25396, and Ca\_16211), and apple *ASRs* (Phytozome locus name: MDP0000253074, MDP0000136340, MDP0000435025, MDP0000564469, MDP0000128468, and MDP0000145407).

**Table S1.** The primer list used in this study.

| Primer ID   | Sequence (from 5' to 3')              | Purpose                                                                             |
|-------------|---------------------------------------|-------------------------------------------------------------------------------------|
| CrASR1F     | TACCGAGCTCGGATCCATGGCTGAAGAGAAACACCAC | Primer pair for construction of CrASR1-pYES2 for functional verification in yeast   |
| CrASR1R     | GATATCTGCAGAATTCTCAGCCAAACAGGTGGTGGTG |                                                                                     |
| CrASR2F     | TACCGAGCTCGGATCCATGGCTGAGGAGAAACACC   | Primer pair for construction of CrASR2-pYES2 for functional verification in yeast   |
| CrASR2R     | GATATCTGCAGAATTCTCAACCAAAAAGATGGTGATG |                                                                                     |
| CrASR3F     | TACCGAGCTCGGATCCATGGCTGAGGAGAAGCACCAC | Primer pair for construction of CrASR3-pYES2 for functional verification in yeast   |
| CrASR3R     | GATATCTGCAGAATTCTCAGCCAAACAGATGATGGTG |                                                                                     |
| CrDHN1F     | TACCGAGCTCGGATCCATGGCAAATTATCAGAACCA  | Primer pair for construction of CrDHN1-pYES2 for functional verification in yeast   |
| CrDHN1R     | GATATCTGCAGAATTCTTACTTGTGTGATGATGTG   |                                                                                     |
| CrDHN2F     | TACCGAGCTCGGATCCATGGCAGAGGAAAATCAGAAC | Primer pair for construction of CrDHN2-pYES2 for functional verification in yeast   |
| CrDHN2R     | GATATCTGCAGAATTCTCAGTCACCGGCACTCTCC   |                                                                                     |
| CrDHN3F     | TACCGAGCTCGGATCCATGTCTGAAGCCCACTACG   | Primer pair for construction of CrDHN3-pYES2 for functional verification in yeast   |
| CrDHN3R     | GATATCTGCAGAATTCTCAGTTGGTGTGATGGCCAG  |                                                                                     |
| CrDHN4F     | TACCGAGCTCGGATCCATGGCAGAGGAGAAGCTGAAC | Primer pair for construction of CrDHN4-pYES2 for functional verification in yeast   |
| CrDHN4R     | GATATCTGCAGAATTCTCAATGAGTATCGGTCTCC   |                                                                                     |
| CrDHN5F     | TACCGAGCTCGGATCCATGGCAAGTTATCAGAGTC   | Primer pair for construction of CrDHN5-pYES2 for functional verification in yeast   |
| CrDHN5R     | GATATCTGCAGAATTCTTACTTCTCGTTGTGTCTCTC |                                                                                     |
| CrLEA4-1F   | TACCGAGCTCGGATCCATGGCGTCGAGGCAAGAATTC | Primer pair for construction of CrLEA4-1-pYES2 for functional verification in yeast |
| CrLEA4-1R   | GATATCTGCAGAATTCTCACATTTTCTCACGACCAC  |                                                                                     |
| CrLEA4-2F   | TACCGAGCTCGGATCCATGGCGTCAAGGCAACAACC  | Primer pair for construction of CrLEA4-2-pYES2 for functional verification in yeast |
| CrLEA4-2R   | GATATCTGCAGAATTCTTATTTGTACGTCGCTCCAC  |                                                                                     |
| CrASR1RTF   | CCACAACAAGGACGAGGATAAG                | Primer pair for qRT-PCR of <i>CrASR1</i> in <i>C. rosea</i>                         |
| CrASR1RTR   | TAGCCAACGGAAGGTTCATTAC                |                                                                                     |
| CrASR2RTF   | ACCATCATCACCACCATCAC                  | Primer pair for qRT-PCR of <i>CrASR22</i> in <i>C. rosea</i>                        |
| CrASR2RTR   | CATCCACATTTCCAGCAACATC                |                                                                                     |
| CrASR3RTF   | CTGCTGGTGCTTATGCTTTG                  | Primer pair for qRT-PCR of <i>CrASR3</i> in <i>C. rosea</i>                         |
| CrASR3RTR   | GCCGCAATCTCCTCTTCTATC                 |                                                                                     |
| CrDHN1RTF   | GTGGCAGTACTAAAGTGGTAGG                | Primer pair for qRT-PCR of <i>CrDHN1</i> in <i>C. rosea</i>                         |
| CrDHN1RTR   | CTTGTTGTGATGATGTGTTCCAG               |                                                                                     |
| CrDHN2RTF   | ACAGCAGCTCAAGCTCTTC                   | Primer pair for qRT-PCR of <i>CrDHN2</i> in <i>C. rosea</i>                         |
| CrDHN2RTR   | CCTCGATCTTCTCCTTCAATCC                |                                                                                     |
| CrDHN3RTF   | GAGGAAGAAGAAAGGACTGAAGG               | Primer pair for qRT-PCR of <i>CrDHN3</i> in <i>C. rosea</i>                         |
| CrDHN3RTR   | GATGTAGTGGTGGTGGTTGTAG                |                                                                                     |
| CrDHN4RTF   | ACGATACCACTCCACCAATAC                 | Primer pair for qRT-PCR of <i>CrDHN4</i> in <i>C. rosea</i>                         |
| CrDHN4RTR   | TGAGGCTTCTCTTCTCCTTTC                 |                                                                                     |
| CrDHN5RTF   | TGGTTATGGTGCCACTGATTAT                | Primer pair for qRT-PCR of <i>CrDHN5</i> in <i>C. rosea</i>                         |
| CrDHN5RTR   | CGGTAGTTCCTGTTCCACTTC                 |                                                                                     |
| CrLEA4-1RTF | GGTGTGATAGGGTCCATGTTTAG               | Primer pair for qRT-PCR of <i>CrLEA4-1</i> in <i>C. rosea</i>                       |
| CrLEA4-1RTR | GGTCTTCTGGGTGGTGAATC                  |                                                                                     |
| CrLEA4-2RTF | GCTACTGATGCTGCTAAGAGAG                | Primer pair for qRT-PCR of <i>CrLEA4-2</i> in <i>C. rosea</i>                       |
| CrLEA4-2RTR | GCAGTCTCCGACGTTCTATTT                 |                                                                                     |

|                    |                                       |                                                            |
|--------------------|---------------------------------------|------------------------------------------------------------|
| CrEF- $\alpha$ RTF | GACCTTCTTCGTTTCTCGCA                  | Primer pair for qRT-PCR of reference gene                  |
| CrEF- $\alpha$ RTR | CGAACCTCTCAATCACACGC                  | <i>CrEF-<math>\alpha</math></i> in <i>C. rosea</i>         |
| CrASR1-BDF         | CATGGAGGCCGAATTCATGGCTGAAGAGAAACACCAC | Primer pair for construction of CrASR1-pGBKT7              |
| CrASR1-BDR         | GGATCCCCGGGAATTCTCAGCCAAACAGGTGGTGGTG | BD vector for transactivation activity assay               |
| CrASR2-BDF         | CATGGAGGCCGAATTCATGGCTGAGGAGAAACACC   | Primer pair for construction of                            |
| CrASR2-BDR         | GGATCCCCGGGAATTCTCAACCAAAAAGATGGTGATG | CrASR2-pGBKT7 BD vector for transactivation activity assay |
| CrASR3-BDF         | CATGGAGGCCGAATTCATGGCTGAGGAGAAGCACCAC | Primer pair for construction of CrASR3-pGBKT7              |
| CrASR3-BDR         | GGATCCCCGGGAATTCTCAGCCAAACAGATGATGGTG | BD vector for transactivation activity assay               |

**Table S2.** The sequence information of all 84 *CrLEA* and 3 *CrASR* genes.

| The sequence information of the CrLEA/CrASR superfamily |                                                                                                                                                                                                                                                                                                                                                                                                                                                                                                                                                                                                                                                                                                                                                                                                                                                                                                                                                                                                                                                                                                                                                                                                                                                                                                                                                                                                                                                                                                                                                                                                                                                                                                                                                                                                                                                                                                                                                                                                                                                                                                                                                                                                                                                                                                                                                                                                                                                                                                                                                                                                                                                                                                                                                                                                                                                                                                                                                                                                                                                                                                                                                                                                                                                                                                                                                                                                                                                                                                                                                                                                                                                                                                                                                                                                                                                                                                                                                                                                                          |
|---------------------------------------------------------|--------------------------------------------------------------------------------------------------------------------------------------------------------------------------------------------------------------------------------------------------------------------------------------------------------------------------------------------------------------------------------------------------------------------------------------------------------------------------------------------------------------------------------------------------------------------------------------------------------------------------------------------------------------------------------------------------------------------------------------------------------------------------------------------------------------------------------------------------------------------------------------------------------------------------------------------------------------------------------------------------------------------------------------------------------------------------------------------------------------------------------------------------------------------------------------------------------------------------------------------------------------------------------------------------------------------------------------------------------------------------------------------------------------------------------------------------------------------------------------------------------------------------------------------------------------------------------------------------------------------------------------------------------------------------------------------------------------------------------------------------------------------------------------------------------------------------------------------------------------------------------------------------------------------------------------------------------------------------------------------------------------------------------------------------------------------------------------------------------------------------------------------------------------------------------------------------------------------------------------------------------------------------------------------------------------------------------------------------------------------------------------------------------------------------------------------------------------------------------------------------------------------------------------------------------------------------------------------------------------------------------------------------------------------------------------------------------------------------------------------------------------------------------------------------------------------------------------------------------------------------------------------------------------------------------------------------------------------------------------------------------------------------------------------------------------------------------------------------------------------------------------------------------------------------------------------------------------------------------------------------------------------------------------------------------------------------------------------------------------------------------------------------------------------------------------------------------------------------------------------------------------------------------------------------------------------------------------------------------------------------------------------------------------------------------------------------------------------------------------------------------------------------------------------------------------------------------------------------------------------------------------------------------------------------------------------------------------------------------------------------------------------------|
| Protein                                                 |                                                                                                                                                                                                                                                                                                                                                                                                                                                                                                                                                                                                                                                                                                                                                                                                                                                                                                                                                                                                                                                                                                                                                                                                                                                                                                                                                                                                                                                                                                                                                                                                                                                                                                                                                                                                                                                                                                                                                                                                                                                                                                                                                                                                                                                                                                                                                                                                                                                                                                                                                                                                                                                                                                                                                                                                                                                                                                                                                                                                                                                                                                                                                                                                                                                                                                                                                                                                                                                                                                                                                                                                                                                                                                                                                                                                                                                                                                                                                                                                                          |
| CrLEA1-1                                                | MQGAKKAGESAKETVANLGASAKSGMEKTKATVQEKTERMRARDPLQKDLATQKKEEKINQAEIDKQAAAREHN<br>AAAKQSATAGHMQGGHHTTGTGTGTATYSTTGQHGQPMGAHQTSAMPGHGTGQPTGHVTEGVVGSHPIGTNRD<br>PDGTATAHNTRAGGNPNNDYGYGTGGTYT<br>MQAAKQAVENIKETAANIGASAKSGLEKTKASIQEKTEKMSAHDEIQKEIATRKKKEERINQAEIEKQQAAREYN<br>AAAKQSAMAGHMSQAHYTNSGPGTETATDLTIGSRPETDATYSTTGPGPEIPTTYSTTGPGIETAIFFPATGSG<br>PDTATHPIGEYAQPMGITPMGVVGSNPSGTNTGVDSTAPMSGHNF<br>CrLEA1-2<br>MQSSKEKLQNVAAAAKEHVDIYKAKIDEKAERATARTEEEKAIVHERAKAKEAKAKMELHEAKARHAAEKL<br>CrLEA1-3<br>KQSHYYGLHEHESPVVGAQQQPPLVGNQTYQQGHSLGAVPMSGTTYPSYPLGNPPSSKHI<br>MHAKTDSVETSLDASSTTRSPRAVYVYQSPSHDGEKTTSLHSTPVLSPMGSPPHSHSSSRFSGSRKMNH<br>RNNKTWKDIDVIEEGLQSEERDRTLRRFYFLAFVIAFFLLFSLSLILWGASRPMKPKIVIKSIKFDHLR<br>VQAGSDSTGVATDMITMNSTLKFYTRNTGTFFGVHVSTPLDLSYSEIVIATGNMKNFYQSRKSQRLVSVAVM<br>GNKIPLYGSGASLSSSTGMPTVPVPLKLSFVIRSRAYVLGRVLKPKYKRVDCSITLDPKKITLPLSLKKSCT<br>CrLEA2-1<br>YD<br>MADGPPATTAATKPRRPRPPSGRNLASCVVATIFLIFIIIVILIVYYTVFKPQDPKIAVSAVQLPSFSVNVG<br>CrLEA2-2<br>TVNFTFSQYASVRNPNRAAFSHYDSSLQLLYSGSQVGFMPFIPAGEIDAGRTQYMAATFVSQSFPLSAPARLGP<br>TLANGDGVGFNYGLRVEPTMEIESKLEAGRVRLHFFSHHVHAKAGCRVAIAVTDGSLVGFHC<br>MAQSPEQVKPLAPFISSNYLSRQEDQNISERKIIIRKFRVCCGCVTALVLIFFVLIILVLGFTVYNVKEPEVR<br>MNRVILLNRTLANGAINDVTLADISLKNNAFTFRFGYTNTTVYDGTIEIGETSPPGKAKARTIRFNVTM<br>EIMAKKLLAVPSESSEDIRDDQALNISSYTMVDGKVKIYNLFMKKVVVELNCTIQYNITTGLTSSNGGNCIGLV<br>CrLEA2-3<br>DL<br>MATNMPKFKRKLGMGADGRTNPIVWLIAICTIIAVAVVAGIAVFIGYIVIHPRVPIISVTD AHLDFLRNDY<br>AGRLQTQIRIVVTAKNGNAKAHATFSKMTFNISYQGGQDI AVLVDADPFEVPKNSSKELHYVVQSSSIPLNPDQM<br>CrLEA2-4<br>EEVTNAWKQNEIEFDFKGAARTQWRVGPLGSVKFLCHLDCDLKFRPLNGSYVPSHCTSKSK<br>MMSGRENVRVSEEGEATSRQQQLYYAATPPSSHSSTCKGCCCLFLLFSFLGLLVLAALLLIVLVKPRNPH<br>LDLSQVGFQYMAIRPNPNPDATASLYLIIRLVLSVVPNPNRVIRYGESRLSLMFRGVTLGRASVPAFFQRAHS<br>VTEVVATVAVDGVNLSEADAADFTRDALLNDRVELRVLGHVAAKIRLFNLYSPLQVSVNVCVIVISPRKQSLT<br>CrLEA2-5<br>YKQCGLEGLNV<br>MTEPSSKPNGAINGAATTTNGNPGPVKSQLYPNRQLYRPQSHYHRRQRSHRNLCSCCFCWTILTLAVAL<br>LAAIVGAALYVLYRPHRPEFSVTNLRIAKMNLTTSSDSPSHLTTLFNLTLISKPNPNHVVFFYDPFTVNVFSN<br>CrLEA2-6<br>SVPVGNGSLTAFTSDKNNQTSIRTVLSGSQDLDTESLTSLSRSLGKKKGFPVEIQMDTKVKMKMDWLKSKKVG<br>RVTCDGIKGTVPAGKTPAVASVINDCKVDLRIKIWKFSF<br>MEERVSSQLSPPPPVVQSPQDPSIQNHSSKALQLSPNLDPGTYVVRVPKDQVYRVPPEAEIAELHRSTPQ<br>CrLEA2-7<br>KNTKTRCWCVCVTCFIAVILIIIGGILGGLFSVVLKPKDPRFSIQHFNVLKGTPKPKYNITLQAHNPNSKV<br>GIWYKEGHHVSLSLRPKEIASGSYPSFHQTPHDSPTFGVTLKASKAGFPKEVEESITNHHKHVHVAFSLTIHV<br>PARMKMGLLRSGTMQFDVTCQVTLDSLAKTPRVLSSQCCQTKRH<br>MSQITIKSPKHCATKQGLKIERNYKKLFYVFSAFFTSILLIILILHPSKPKQFSLKQVDIYQLNLSGPNI<br>CrLEA2-8<br>NSSIQLTLLSKNPNQKVGIIYDEFQVYATYKQQITGDTVPVPFFYQGGQENNLTLASLVGNGLPVAPSLGYEV<br>GRDQTVGRLVLNVKVNGLRWKVATWVSGRYRNVNCSIIAFGPSAPLTSKQGARCSTTI<br>MKAGSGKGRKVCVTVTGVVIAIVMLMVILALTVEKAKHPVTTVDSVMLQDFHMSLDIAKLKVDLNVTLDVDVS<br>CrLEA2-9<br>VKNPNKVGFKYSDSTAHLNRYGQLIGEVPI SAGEISSGETKGFNLTITIMADRLISNAQLYSDFTSGTLP<br>FIRISGKVSILGFIKVHVVSSTSCDFAVNLNRTVGNQECQYKTKL<br>MILSTRLRPLISGNREVTCDTYHHVSAWDETTCGIRVWSRNLNLLNKAADFVSEKINNVAKPEASVTDVDFKRV<br>CrLEA2-10<br>RDSIEYLAKVSVRNPYSTPIPICEIKYSFKSASREIASGRMPDPGSLKAKDTTMEVEVPVKVPYSILMSLAKDI<br>GADWDIDYQLDLGLVIDLPAIGNFTIPLSHNGEVKLPTLSTMFA<br>MAEREQVRPLAPSIDRPSSDEDDTTLHRTSPARTKFIKWACPLAFLLLAIILVLIITVTVFHKDPDIRMNG<br>VKITKLELVNTLTPKPGANMSLIADSVKNPNVASFVRYNTTSLFYHGMVGEARGPPGRAKAKRTIRMNV<br>CrLEA2-11<br>IDVITDRIVSNPDFTDFVSGLLTMTSFSRVPGQVKILNLFKKHIVVMNCTTTFNISTQGIQEQSCKRKQKT<br>TCSTISPFGATNSLKVIIISYGTQDLRVI<br>MQIHDQEEPTQQHSQNPQHFRVKVPQQQHYNMDKGIIPRFPKNAPKREHCICITVFLLLGLIIILILWLAYH<br>CrLEA2-12<br>PSKPRFTVASAATYGVNNTSPPLMSITMQFNILIRNPNKRVSIYFDRLSAYVSVRNQPIPTPRVMLPPLFLEKH<br>SAVLSLPEIGGVVPVSEEVSNGLAMDES YGVVAVKLMFLGRLRWKTDGINS AHYGLYKCDVLMGLRKGFGV<br>QVPLLGAAPVCEVNT<br>MTDRVHPSANGGKTATFPATKSQLYGATRPSCYPQPYHQRRSSSRGWCCSLCLCLILILLFLLLLIGGAGTVA<br>CrLEA2-13<br>YFLYHPQRPSFVSLSLKLSTSSSTLNSKFEKLSATNPNNKIVFSYDPTSVSILSNEDIDIAHGTPSE<br>RHSQRNITILKVSIIASSEESVESDAAMRLKGIKMSNSGLALKVKLETKVQANMGVLHTPSVPVTAFCDGVAVT<br>LPDGDKPATASIANTECNVDVRFKIWKWTVG |

|           |                                                                                                                                                                                                                                                                                                                                                                                                                                                                                                  |
|-----------|--------------------------------------------------------------------------------------------------------------------------------------------------------------------------------------------------------------------------------------------------------------------------------------------------------------------------------------------------------------------------------------------------------------------------------------------------------------------------------------------------|
| CrLEA2-14 | MYEKQPQLNGAYYGPSIPPPKSYHRPGRGGGCDCCCGCIFSLIFKLILTVIIIVGIAVFLFWLIVRPNVVKVH<br>VTEATLTTEFNNTGNTLYDLALNMTIRNPNKRLGIYYDRIEARAIFQDARLDSKFLEPFYMGHKTTKLLNPAF<br>KGHQVVLNTDQTAELKKENSTGIYEIDVKLYLRVRFKLGVFVKTKTLKPKVTCDLRVPTSPNGPSPALGAFO<br>TTKCDWDR<br>MADKQPQLNGAFYGPAPPPAQQPRYHRHHRGRSCCCCLFGIFWKILVALIVLAGLAGLIFYLVVQPRSFKFY<br>VTEANLNQFEYHSNNNTLNYDMVNLFTARNPNKKLSIYDKVEALTFFYEGARFSNYDVITHFNSFRQYKSSS<br>PMSGVFKGNRVVVLNDNDQSELNRDQNERVYDIYVRLYFRIRFRLGDVISRDFKPKVKCHLKVPLASTTTTLE<br>QPTKCDVDF |
| CrLEA2-15 | MSVKECDHHKGGKKHIFRRIFWGIVIFVFIVLVTLIIWAILKPTKPTFILQDVTVYAFNASIPNLLTSNFOV<br>TLSSRNPNDKIGIYYDRLNTYVTYRNQQVTYRTSIPPSYQGHKEEDVWSPFVYGTNVPVAPYNFAGLSQDQSN<br>GNVLVIVKIDGKVRWKVGAFIGSHYNYLRCPAFITFGPRSNGLAIGDNAVYQQLVQRCTVGV<br>MEKDKISGSPKRAVCTCITIFLLLVAILLLVLVLYRPHKPRFVVGAAYGLNTTTPPLMSATMQLTVLIRN<br>PNRRVSVYYDRFSAFVSYRNQAITPQVALPPLHQDKHSTVSLSPVIGGTAVPVSVEVSNGLMVDEAYGVGLK<br>LTFQGRVRWKAGAIKTAHYGLYVNCNLMGLKKGFGVGPVPLLGAQPCDVL                                                              |
| CrLEA2-16 | MDVSASNSDCFWWKEHLPFGFSFKKCCFLLIFLLITCMVVGLATFFVILIVRPHKPVFSVREVQINFYKIDDR<br>SNLTLVSSVISLTLNAENHNKFGIGFSPSRFLVYQEGHLHIGTIRVPWFQPPHTENVTPSRVLLQCVNLSK<br>IVANTSLQEMSKONTAPIKITGDARVHVWVLHLIKLFEIKIALDCGMNFNIREFAFTNEAFGAKISKSDLGSVL<br>SDSKGISMKCASSVYI                                                                                                                                                                                                                                           |
| CrLEA2-17 | MSALAPKQEIMTEAQNNEDQEQVVVISQKKLKRKVCVITTGTVLVLVLVLIIVGLVLVLNLLKPKDPRADLV<br>SATLEGIAPRVTLPAIDIQINVTLDLKIQVENRNHVSFKHQGGKSVLLYGGKEVGETQLYPGVIPSQGSTILF<br>CRLTLQAEKLASNFSGLVEDLMGGQISMGAVTRIPGRVTFGLGFIKKHIIAKSNCOFTVSVSDFKIIISQACKNK<br>AKL                                                                                                                                                                                                                                                      |
| CrLEA2-18 | MIEKYGHRKKSNNMCLVVTICIAVIAILAVATILVSTMLKPRQPITKVEGIRLDDMMNMNMFMKMRMDINVTLKV<br>DMSEVENTNKFVYNDLSLAQLNYGGELIGEAPINGEILSEETKGMNLTITIMADRMFNSQAFAKDVTTGSLF<br>LNTIVKLSGQVILGLINFHVGSTLSCDFNLVSNRTIDHKECHHDTKI<br>MRVGLGVKVSGLGIVGSLILAAFKMSELLDKAKNYVSEKVANMPKPEAAVADVDFKRVSRREGVEYLAKVSVSN<br>PYPSPICEIKYSLKSAGREIASGTIPDPGSLKAKDITMLDVPVKVPHSILLSLARDIGRDWDIDYQLDLVL<br>IIDLPVVGNFISPLSQQGEIKLPTISDMFT                                                                                            |
| CrLEA2-19 | MCKTVGRLLALLLVIIPVTVTVAFLFCLIVRPNVVKFHVTDATLAQFSYTNNTLYYDLTLIVEVRNPNTKIR<br>IHYNYMEEVVLYQNVKFCSLILGTIYIQPHKNTAMLTVPVFKGQVMSLNKDHILETYNNEKRSIGIYHIDFKLYL<br>KVKFDLGVYKTNMNMKSTVTCNLQLPLQSYNGTSTAGRFLTRCNFDYKHILFIF<br>MADYKQPQLNGAYYGPSIPPAEPFRQRAHRGRRCCLFSPFFWKFLLAIAVLIGLAILFVLLVQPRAFKLHV<br>TEASLTQFNYTSNTLQYNLVLNFTARNPNKKLNIYYDKVEGHVFYDSVRFASDVTITWQNSFRQYTKSTNRMS<br>GVFSGQRVIVLDHNRASDLEEDKRSIGIFHIDVRLYFTIRFRLGDFIWNNDIKPKAKCGLKIPFSSNGTTVNEF<br>RPTKCDVDF                             |
| CrLEA2-20 | MSVKECDLHKGKKRKFIFLRFWGIIVFLFIVLVTLIIWAILRPSKPSFILQDVTVYAFNATVPNLLTSNFOV<br>TLSSRNPNDHIGVYDRDLTYVTYQSQQITYRTAIPPSYQGHKEIDVWSPFVYGTNVPVAPFNYAGLSQDQSN<br>GNILVTIKIDGRVWRWKVGAFIGSYHLYVRCPAFINFGTRNNGISVGENGAIKYQLVQSCSVSV<br>MADHQRQRIHPMEVGAPPPPTIPLVPPGSSRSEKGNPLHRPQLHARPAIYPSPKKGNCFCKICWTLCIVFL<br>LLIILAATVGILYLVFKPKLPNYSVETLRIISDLRLNFDLSLYAKFDVKITANNPNKKIGIYYEEGKLSVWYR<br>KTRLCEGSLPKFYQGHQNTVLNVSLTGQVQSGSTLMTALQQQQQTGRIPDLKLVHAPVAIKLGRFKLRKVRV<br>LGECLLVVDSLSSNNLITIKASNCKFSMKL   |
| CrLEA2-21 | MRSNDHIPVHHVAGPNPKPMKRHTARYVYVHRVHESLTRVSKIICATFLGLLAIVGLITFILWLSLRPHRPR<br>FHIHEFNMPGLTQQSGFENARITFNVTARNSNQINGVYVESMDGAVYYRDQKIGSTSLNPFYQEPKNTTEVD<br>GDLGATLTIVSSQHWAEFQSDRADGSVVRLEVTSVIRFKISTWDSKRHTMHANCVDGVGPDGSLLSNYKDKR<br>CPVYFS                                                                                                                                                                                                                                                       |
| CrLEA2-22 | MKPNHNITMLAKTDSEVSSLSQSSPARSPRAVYVYQSPSRDSSNDGEKTTNSFQSSPLQSPGLSPPHSHSNS<br>SLGPHRESASTRESGSRKTNESENKGPWRPWKDQFHAIEEGLLDAHDAAQHGFPRCYFLAFVVGFFVLFS<br>VFSLLWLGASRPQKPAITLKSITFDQFVIQAGADVSGVATSLVSMNSSVKLTFRNTATFFGVHVTSTPLNLNY<br>YQLTLATGSMKPKFYQSRKSQRSVRVMVKGSHIPLYGGGANLNSVNGAPVEAVPLKLSVMVRSRAYVLGKLVKE<br>KFYKKIDCSVVMMDPKMKGPISLMTKCTYQ                                                                                                                                                  |
| CrLEA2-23 | MTRNGGERMTTGNQPOPHPHQPQPQPQPNGERRQRPAPASAPETPAQYSASSNGNGYRQYNPTTF<br>SRSSSSASFKGCCCLFLLFSLALLVLAVVLVILAVKPKKPQFDLQQVGVQYMGITPNPPSTASLSLTI<br>LFTAVNPNKVGIKYQSSFTVMYRGIPLGKASVPGFYQDSHVSQVATIAVDRVNLQADAADLIRDASLND<br>RVDLRLVLDVGAKIRVMNFDSPGVQVSDCAIVISPRKQSLTYKQCGFDGLSV                                                                                                                                                                                                                       |
| CrLEA2-24 | MAHPPPQSQPQAGKPNRSILLRYIAMILLFIILVGLAVLIILVLKPKRLEYVEDAAIHKFNLTANHLYA<br>NFDFTIRAYNPNRSVSLYDSVEVAVRYEDQTLATNAVKKFFQSHKNVTRLHVGLTAQTVALYDSVPKDLRLE<br>RSSGDIELDVLLRARIRFKVGVWKSXHRIMTIFCSPVFLTFSKAKSFQRTPEVQL                                                                                                                                                                                                                                                                                     |
| CrLEA2-25 | MPSLSPSPLEKLGIPKQPRNQHFRELEAPNSLNTLVILGQPHLQRTKPIIWCAAVLCLIFSLVLIFFGIATL<br>ILYLAMKPRNPTFDIPNASLNVYFDSQYLNGEFTLLANFNSPNRRFHVRFESLKVLEFSDRLISTQSIKF<br>FTQRPKETRLQPVNFISSLVFLPDQVGVKLQRQVQNNRVNYNARGTFKVRVNMGLIHLSYWLHSICQIEMTSF<br>PTGILVARQCITNR                                                                                                                                                                                                                                                |
| CrLEA2-26 | MSTSDKPEIVERGSKDEKHKEGEKEEGKGGFIEKVKDFIHDIGEKEIEGAIGFGKPTADVTAIHIPSINLHKAD<br>LVVDVLIKNPNPVIPLIDIDYLIIESDGRKLVSGLIPDAGTIAHGEETVNIPTVLIYDDIKQTYNDIQPGSI<br>IPYRVKVDLIFDVPILGRFTLPLEKTGEIPIPKPDIDLEKIHFERFSFEETIATLHLKLENKNDFDLGLNAL<br>DYEUVFGDVSIGGAELTKSAKIEKSGISYIDIPITFRPKDFGSVAVWDMIRGKTGYTMKGNIDVDTPFGPMKL                                                                                                                                                                                  |
| CrLEA2-27 | PISREGGTRLKKKKEDRDYDDDDDDDED<br>MADRHPQDSPPVSGESQTTSSQPAIVQNPAPQPLSEKVPVPPPGTYVIRIPKDQVYRVPVPPENARRQDQFIR<br>RKHRRSRCCCCFCWLIGFIFILVLLGIAAGVLYLVFRPEAPKYTIDGAIARGMNVTS PSSAAAVSPEFDVTV<br>KADNPNDKIGIRYETDSSAEIFYNDVRLCNGALPAFYQPSNNVTVFKTVLRNGIKLRSGRSALLEAQTKRK<br>VPLTVSLRAPVKIKVGSVQTKITVKVDCDVTVMELTAQAKIVHSKHCYNVDLV                                                                                                                                                                       |
| CrLEA2-28 | MADPQRIHPVHDVEAPNHPTAPLVRPSVSKSDAGDPENNVHHPPTSLPSQPVMSHSPKPKRRSCLLCLW<br>FISILLILIVAIGITIGILFLVFRPKLPKYSVDELRTVQFDLADNNSLVTFNLTIIARNPNKKIGIDYRGGG<br>HISAWYMDTKLCEGSLPKFYQGHNRNITVLSIPLIGHTQDASGLQSTIQQLQQTGNVPLNLKVKQPVRIKLGK<br>LKLFKIKFRVRCRLVVDNLNANNSIRIRSSSCKFRFRL                                                                                                                                                                                                                         |
| CrLEA2-29 |                                                                                                                                                                                                                                                                                                                                                                                                                                                                                                  |
| CrLEA2-30 |                                                                                                                                                                                                                                                                                                                                                                                                                                                                                                  |
| CrLEA2-31 |                                                                                                                                                                                                                                                                                                                                                                                                                                                                                                  |
| CrLEA2-32 |                                                                                                                                                                                                                                                                                                                                                                                                                                                                                                  |
| CrLEA2-33 |                                                                                                                                                                                                                                                                                                                                                                                                                                                                                                  |
| CrLEA2-34 | MNCRPRCSFCCICCIYTTIYVLMFILMLLLIIFWIVISPSVVKFHVTDATLTQFNLTNTNLHYNLKVNITVR                                                                                                                                                                                                                                                                                                                                                                                                                         |

|           |                                                                                                                                                                                                                                                                                                                                                                                                                                                                                                                                                                                                                                                                                                                                                                                                                                                                                                                               |
|-----------|-------------------------------------------------------------------------------------------------------------------------------------------------------------------------------------------------------------------------------------------------------------------------------------------------------------------------------------------------------------------------------------------------------------------------------------------------------------------------------------------------------------------------------------------------------------------------------------------------------------------------------------------------------------------------------------------------------------------------------------------------------------------------------------------------------------------------------------------------------------------------------------------------------------------------------|
| CrLEA2-35 | NPNNNVKVYYRAITAIAWYKDNDIGLVSLTPFDQGHKNTTFLQAVFIGQSVIKLQAKQLDEYKEETSVGIYND<br>LAVDLDLTIRAKFGRFRSSHYNPPIVQCRRLLKVPLISNAKTTTPFSVTKCSTGYFFKDRDADAEG<br>MCKCPRSTFCCIYCTFYTLMIIFFLSVIIFWIIISPSNVKFHITBASLTQFNLTNNNTLYNLKVNITVRNPN<br>NNIIVYYRIKAIAWYKDNDGFWVSLTPFDQGHKNTTFLQVEFKGQSVIKLKAQQLGEYKEETSVGIYNDLAV<br>DLDLRIRAKYGRFKSSRFNPPVQCRRLLKVPLISNGKTPFPFSVTKCKSGSFFVDLISPSVVKFHVTDASLTQ<br>FNLTNNTNNTLYNLKVNITVRNPNNNIIVYYRGITAIAWYKDNDGFWVSLTPFDQGHKNTTFLQAVFKGQSVIK<br>LKTQQLGEYKEETSVGIYNDLAVDLDLRIRSKYGRSGFSFCCFFCIYNTFYTFIFLFTLSLIIFWIIISPSV<br>KFHVTDASLTQFNLTNNNTLYNLKVNITVRNPNKKSIVYYSCTAIAWYKDNDGFWVSLTPFDQGHKNTTFL<br>QAVFKGQSVFKLAKQLGEYTEETSARIYNDLAVDLDLRIRFKEGRFKSSRFNPPVQCVA<br>MTGKDEFLSYSPLPSNPYPYNNPNPNPNPNPHYPQNVVVLPSYRSPSLRRRRRCILYSAALFIFFLLVAA<br>VFIFYPSPDPEIRLVRIRLNHIGIRTSPRPILDLSFSITVKVRNRDFLSLSYDSLSVSVGYRGRQLGFTVSSAA<br>GRIRARSSSYVDATLTVNGFEVIYDAFYLLQDIARGVIPFDTDTRVEGNLGLLFFNIPLKATVSCVYVYNINQ |
| CrLEA2-36 | QTIVRQNCYPESIGDPLDQSTYIGVADT<br>MHAKTDSVDTSCDPSSPRSPKRAVYVYQSPSRSHDGDKSSSMHATPACNSPMESPSHSHSGHHSRASSSSRV<br>SGSYNSSWGRKGRKRNNDKEWPECKVIEEGNGDIFYPDNKGFSRRTQIFIAMIGFVLIFGVFCLIIWASRP<br>KFQLSVKSLTVHNIFYEGEGDMDTGVP TKMLTVNCSMRMMVHNPATFFGIHVNKAVSLMYSEITVATGELKN<br>HYQQRKSRTTVFVNLQGSKVPLYGAGASLAGLVDKGKIPMTLVFEVKSQGNVVGKLVRSKHRQHVSCSVAIDS<br>HNNKPIKLNKNACTYD                                                                                                                                                                                                                                                                                                                                                                                                                                                                                                                                                             |
| CrLEA2-37 | MKQNTIGSKIFLCTPALVFPPKQDFKGNPNCSYYPEPETMAKRNLIKICISVSAVFFIIVITVFTLILITIFKP<br>KNPDI FLHPVDLKNFQLLSSNSTNAPLGMVVTIVPNYGSFRYINSTGYLEYRNTTVAKVPLETKVSPARTRT<br>NVSTSAGIMTEKLIDDPKFWEIEGGTFNLTAKATLPKGVSMFNI FKLKATVHISCDISINIIAIDSGSTCVA<br>KLKL                                                                                                                                                                                                                                                                                                                                                                                                                                                                                                                                                                                                                                                                                  |
| CrLEA2-39 | MSSKDCGHHEERRQLLRIRVGAIVAFIVLILLIIFLIWIILRPTKPRFIIQDATLYTFNFSSTSPSVTSPTF<br>NILTLTMQVTLAAHNPNHRIIGIYYHNLAYASYRNQQISLATSIPNTYQGHKDFI IWSPIYGNAPVPSFLL<br>SALQLDQSTGTVLNVKVNGRVKWVGVTWISGRYHIYVNCPAYIRFAGDRSNAIGGVTPAVKQQLQSCSVDV<br>MLSNILTWGTGPMGDPEGLWPREVTSIALWRGASLRSQAISVLIFGLNVSHLFLNIPQLIHSFLILQVAMGKKV<br>KWSWSSAFVGAASAVAATAILSAKPKDPTFHLISINFSTSLKLNPLLLDAELLLTVHVTPNPIAPIHYSSTMS<br>IFYEGSFLGSAQVQAGSQPPRSCQLLRPARLHALQLAHHATRFVHDVARREMLDAAVDIAGTAKVLWWDHN<br>FKVHVDSRVTVDPVFLDVIDQESTSELEVFTAA                                                                                                                                                                                                                                                                                                                                                                                                                    |
| CrLEA2-40 | MGGRMHTKSDSEVTSNSIDHSSSSPPRSPRRPLYYVQSPSNHDVEKMSYSGSSPLGSPHHIHYLSSPIHHS<br>RESSTSRFSASLKNRPFSSSWKKLHPHPHHGVDDDEDDDDDLHDSSRNRLRYLCFFLLFVLLFTLFLSLILW<br>ATSKTYKPLAIAKSI VFENLNVQSGNDGTGVPTDMLSLNSTVRILYRNPGTFFGVHVTSTPLQLTYYQLALAS<br>GQMOKFYQSRKSQRKVVVVVLGHQIPLYGGVSGLLGNYKEHIDSVALPLNLTFAVRSRAFILGRLVKSKFYRR<br>IRCSVTLHGNKLGKPLNLKDCSVYK                                                                                                                                                                                                                                                                                                                                                                                                                                                                                                                                                                                   |
| CrLEA2-41 | MSSDPYAHQRYVSLQNGYVSGPPPYGYGRKPPRYHHHSGSGCLCGCLKFFCCCFYSCCRCCICAFFIFILIL<br>VIIIMVLYLLKPDIPSYNIQGIDINTFDLKI DNKLFNSIIVVKADNPNEGILNYLDNEVRLLYSGSQLCS<br>GAFPPFLQPERNVTTFNVTLKGESEFGPEMQQHLMQEQDKGTIHLIIAVRLPIRLVDDLIHLRKFVFNINCS<br>MIIDHLEQNKKPNILRKDFIYGIEF                                                                                                                                                                                                                                                                                                                                                                                                                                                                                                                                                                                                                                                                  |
| CrLEA2-42 | MVSRGGKICIGVSLILVIAIGTVIATLSLTI FKIRDPVISIHPVGLENLKFSLNFSSNVSLGMLTGMGNPNYA<br>SEEFKNSISHVNFHKNVADVPIQGEVVPARGTINVTT SADLMVRKLIIDPKFWSIDILGGHLNLTSTATLPGV<br>AHVLNFIKFKATAYSSCTISLEIRTKNISSNCISKIKL                                                                                                                                                                                                                                                                                                                                                                                                                                                                                                                                                                                                                                                                                                                            |
| CrLEA2-43 | MATRSVKICLSVSLFLIIVTIVITVTLF LTFKPKDPNITVHPLGLENLQFSLLPNLTNLVSLGMLITIGNPN<br>YGSFEYKNSTGYIKFHDTVVAQVPMEAELVPARSTINVTADFMVGKMINDPNFWTDVLTGTNLMTSTSTLP<br>GEARMLKIIKFKATAYSSCDISFNITSKHVDTKCISKFKL                                                                                                                                                                                                                                                                                                                                                                                                                                                                                                                                                                                                                                                                                                                              |
| CrLEA2-44 | MTKDCGHHDEERQQLLRIFAAILGFIIILLVIFLIWIILRPTKPRFILEDATVYAFNLSSTGDI PSPTAPT<br>PNTLTLTMQVTLTALNPNSRIGIYYHNLHVYASYRGQQVSLATELPPTYQGHRTDTVWSPFLYGNAPVPSYV<br>LEVLEQDKTSGGVLVNVKVNGRVKWVGTVWVSGRYHIYANCPAYIRLAGDRDTGIGVAAPAVKFQLFQNCVVD<br>V                                                                                                                                                                                                                                                                                                                                                                                                                                                                                                                                                                                                                                                                                        |
| CrLEA2-45 | MTDRVYPSAKPAANGNGAAANPSFPATKAQLYGATRPTYRPQPHHRRSRRRCCCTFCFWLILILLILLFLLG<br>VAGTVFYLLYRPHRPSFTVTS LKLSYLNLTSSSSLSRFDLNVSATNPKNKILFAYDITSISLSGDVDVGD<br>GTIPAFQHGKKNNTLLKASISSSQALTSDDASRLKANMKS KSGLPLEVKLETKVKAKMGNLKTPKVGIRVFC<br>DGIRVTLPTGKKPATASTKNVKCDVNVREKIKWKTIV                                                                                                                                                                                                                                                                                                                                                                                                                                                                                                                                                                                                                                                     |
| CrLEA2-46 | MLSAKSESDITSLAPSSPSRSPKRPVYVYQSPSRDSDHDGDKSSSMQATPISNSPMESPSHPSFGRHSRNSSAS<br>RFGSIFRSSSGRKGSRKRNKDGWPECDVILEEGSYHEFQDKAFTRRFQALIAVTFVVFVTFVCLIIWASRP<br>YKTEVTVKSFTHNLVYGEGLDFTGVPTKMLTVNGTLRMSIYNPATFFGIHVHSTPINLIFSDITVATGKLKK<br>YYQPRKSHRIVSVNVEGNKVPLYGAGSTITVSQTGEVPLTLNFEIRSRGNVVGKLVRSKHHKEITCPLVINS<br>SGSKPIKFKNACTYE                                                                                                                                                                                                                                                                                                                                                                                                                                                                                                                                                                                              |
| CrLEA2-47 | MMCWIIYVPSSTFINCNSKNTESVQRKAMKISKAAAYDLLLRKPHQHNDIVYSRRCVLTLTCTGLVLVLLTTIY<br>AFWPSDPDLKIVGFRLKRVKLHLPVPVTVDISMLITLVRVHNTDMSYSLDFGAVNVIVAYRGVRLGHVTSSGHV<br>RARGSSYVDADVEFGSISVLPQMVWLLLEDVVGKIVPFDTVS QVRGQLGLLFFHFPMKSRLSCEVVVSIQNQTI<br>VRQHCHRG                                                                                                                                                                                                                                                                                                                                                                                                                                                                                                                                                                                                                                                                           |
| CrLEA2-48 | MCESKSFYKWLMOFICLLGLLVLCWLWSLRPKSPSYISVICISIEQASNSNQNGTISYQLQIENPNKESSIIYHD<br>DIILSFLYGQMEDEVGEDITIGSFHQETGNTRDKIGTVNAKPRPFKPLLNAINATAELTVALKTKFRYKTWGI<br>KSKSHGLHLKGILPIDSNKGKLSRNKKKYPLSPNSQKIGRYKIKH                                                                                                                                                                                                                                                                                                                                                                                                                                                                                                                                                                                                                                                                                                                     |
| CrLEA2-49 | MRCCKGLKICCAVSAILLIILVVVLVILFFT VFKPKDPDII LQSVKLERIEIGFPSPEINVSGLVVTVENPN<br>HGSFTYQNSTAYLNYRGNIVAEAPIHEDTIPARGDHNISTSLDIFADIRKFKDLPSDFLRGVINFTSTTTLQG<br>KVILHLFKFKATSYSTCDLSLLVHDKSINSTCNTKIKL                                                                                                                                                                                                                                                                                                                                                                                                                                                                                                                                                                                                                                                                                                                             |
| CrLEA2-50 | MTKPKQSRTNLASCFTVATIFLIFLVIVVFVYFTVFKPQDPKISVS AVQLPSFSVTNGTVNFTFSQYASVRNPN<br>RGTFSHYDSSLQLLYYGRQVGFMFIPAGKIDAGRTQYMAATFTVQAFPLGFGPTFINGPINVGPTMEIESRIS<br>MAGRVRVLHLFSSHVEAKALCRVPIAVPDGTVLGFHC                                                                                                                                                                                                                                                                                                                                                                                                                                                                                                                                                                                                                                                                                                                             |
| CrLEA2-51 | MSETVTESRSSPERGGIYTHTTSEKLIAMFPIRKEEEKSSKCVVYALVTIATLLGVVCFSSIFLVVRDPKIEL<br>ISARLVDNINHTVISASSPFNLMSIGRVSLWNPNFGRFYDNTTVSVMYGDFSIGASELGAILBAREIKEFN<br>SIVNMRFSEELVNLNDISSCMLKLRSHSDLSGIGYVLKFIKKRKTIQMDCTMNLDLTSSSLRLLQC                                                                                                                                                                                                                                                                                                                                                                                                                                                                                                                                                                                                                                                                                                    |
| CrLEA2-52 | MEMATKHSSSRHHTIHQETAIYKPIHQERSKKWFVFLFSAFVILCAVLLVFASVLRVRSPEVKLR SATLKQIN<br>YRASPAFSFNATLITFLRIRPNPYGAFSYENSTVTVLYAGENIDKGIGSDRVSYRETKQMNVTVNVRSKLP<br>VTGNLSGAINSGMLNLTGYVKFSGTVHLLKIINSRKTIIQIAC TMNLNLTS HAIKGIQC                                                                                                                                                                                                                                                                                                                                                                                                                                                                                                                                                                                                                                                                                                        |
| CrLEA2-53 |                                                                                                                                                                                                                                                                                                                                                                                                                                                                                                                                                                                                                                                                                                                                                                                                                                                                                                                               |



|  |                                                                                                                                                                                                                                                                                                                                                                                                                                                                                                                                                                                                                                                                                                                                                                                                                                                                                                                                                                                                                                                                                                                                                                                                                                                                                                                                                                                                                                                                                                                                                                         |
|--|-------------------------------------------------------------------------------------------------------------------------------------------------------------------------------------------------------------------------------------------------------------------------------------------------------------------------------------------------------------------------------------------------------------------------------------------------------------------------------------------------------------------------------------------------------------------------------------------------------------------------------------------------------------------------------------------------------------------------------------------------------------------------------------------------------------------------------------------------------------------------------------------------------------------------------------------------------------------------------------------------------------------------------------------------------------------------------------------------------------------------------------------------------------------------------------------------------------------------------------------------------------------------------------------------------------------------------------------------------------------------------------------------------------------------------------------------------------------------------------------------------------------------------------------------------------------------|
|  | <p>TLEKLHRSNSSSSSSSDEEEEGEGGEKKKKKKKKGLKEKIGGDDHKEQD TAVPVEKVEVDSEHPDTEEEKK<br/> GFLDKIKEKLPQGHKKAEEVSP TSSSEYVA AHTAETHEGEAKDKEKKGLLDKIKEKLPGYHSPKPNEDKEKETDT<br/> H</p> <p>MASYQSQYGDQGRKTDQYGNPVTQT DQYGNPVRQTGETGKQYGT TGYGANTAD TSGSHRS GTTGGYGT RTEGV<br/> GAGYGT TGGTTTGYGATDYGNTGGTTTGYGGTDYGT TGGTGGTGYGSGTGT TGGTGYGSGTGYGINTGGAHTD<br/> AGYGREHRHGHQSHGGYDASGEQHEKKGIMDKIKEKLPGTGGHNEK</p> <p>MQSAAVNTDAGIVGRQDISDVAREQGVSVSQTKVGNRVITESVGGQVVGQFVEPDPMNSPGMALEPDAIT<br/> IGEALASAVAGAGDKPVDQSDAAAIQAAEMRATGKNETEPGGLGARAQSAATHNTRTPSYFHKTTLSHV LAD</p> <p>CrDHN5</p> <p>CrSMP1</p> <p>CrSMP2</p> <p>CrSMP3</p> <p>CrSMP4</p> <p>CrASR1</p> <p>CrASR2</p> <p>CrASR3</p>                                                                                                                                                                                                                                                                                                                                                                                                                                                                                                                                                                                                                                                                                                                                                                                                                                                                                      |
|  | <p>AEKELPTDKHVTREDAEGVIAELRNKPD MKTTPAGVAASVAAAAAINQNAYLTII L<br/> MSQE QPRREEAIKYGDVFNVERELGSKAVAPVDAAMMQAETAMIGKTEKGAAATMQAAALKNERDGVVGHN<br/> DITEVVAQSGVSVTESDLPGRQVISESVGGQVVHTLEEKERNICKLVEVVEQFGQKVASNTTMPSSLAQDLGS<br/> RVGGGITIGEAL EATVLTAGKKAWEVS DAAAIQAAEV RATGR TNIVPGVAAAAQSAATLNARLTNKDEDKTKL<br/> ADVLS DATSKLPSDRPATRRDAEGVTGAEMRNDPNLTTHPGVSASVAAAAARLNQTNNN<br/> MSQE QPRHPQPAQDP I KYGDVFDVSGDLAKKPVAPEDAAMMQSAETRVLGQTQAGGAASAMQSAATRNEQAGV<br/> VGHRDVT DVTGDRGVTVSETQVPGRRIT ES VGGQVVGQYVEPTPVQAGRAGAVRDSA ITIGEAL EATAQTAG<br/> EKVPDKSDASAIQAAEV RATGSNVI TPGGLASMAQSAAFNAECKRDQEKVKLADVL TGATAKL PADKAATIE<br/> DAEGVACAEVRNPN DATATPGGVAASVAAAAARLNENNVN<br/> MFTTTIWKFLTISFRSETMSHGQPKRPQAE DSFHCEPIKYGDVFKVTGELASKPISPQEAAMKAAEAGVLGQ<br/> PQKGS PAVVMQAAAAINQACGAVDGNVAIKKEDVSVTETTTAGNRIIT ES VGGQVLGRKVDTHAPVVP TDLG<br/> SAVIGDPI TIGEAL EAVAI AVGDKPVNQDAAAI SAAEIRATGEKNVRAGGVGASQA SAATLNSHVMRVQDM<br/> TKLS DILT DATDKLAMD KAVTQEDAEAVYTAEMRFPWRGDATDVISEPGGVAASMATAAKLNEEK<br/> MAEEKHHHHHHLFHHNKDEDKPIETESGYNKTSKYTSNEPSVGYDSGYNKPSYESSGDAYETGYNKTSYDTS<br/> GAYETGYNKTSYDSSGGTYETGYNKTAYSTDEPSAGYGGGRYS DTTGGAYTKKTGEY AAGGGYGDSDRRDDV<br/> DYKKEEKKHHKLEHLGELGAAAAGAYALHEKHKSEKDPEHGRHRKIEEEVAAAAAVGAGGF AFHEHHEKKEAK<br/> EQDEEAHGKKHHHLFG<br/> MAEEKHHHHHHLFHHHKNEEQPVETTVYSETTFDVAGNVDDYKKEEKKHHKLEHLGELGAAAAGAYALHEKHK<br/> AGKDP EHAHRHKIEEEIAA VAVGAGGF AFHEHHEKKEAKKQYEETHEKHHHHHLFG<br/> MAEEKHHHLFHHHKDEDKPGYVDV DYKKEEKKHHKLEHLGELGAAAAGAYALHEKHKAKKEPEHAHKHKIEE<br/> EIAAATAV GAGGFVFEHHEKKEAKKDEEAHGKKHHHLFG</p> |
|  | <p><b>CDS</b></p> <p>ATGCAGGGAGCAAAGAAAGCAGGAGAATCCGCTAAGGAAACTGTTGCCAACTTGGGTGCTTCTGCCAAGTC<br/> TGGCATGGAGAAGACCAAGGCCACCGTCCAGGAGAAGACAGAGAGGATGAGGGCAGCTGATCCTTTGCAAA<br/> AGGATTTGGCAACTCAGAAGAAAGAGGAGAAGATCAACCAGGCGGAGCTGGACAAACAGGCCGCGCGTGAG<br/> CACAAACGCGCGCGCAAAGCAGTCAGCCACGCGCGGCACATGGGACAGGGCCACCACACCACCGGAACTGG<br/> GACCGGAACCGCCACGTACTCCACCACAGGACAACACGGGCAGCCCATGGGGGCCCATCAGACGCTCAGCGA<br/> TGCCCTGGCCATGGACTGGGCAGCCACGCGGCATGTTACTGAAGGAGTCGAGGCTCACACCCCATGGG<br/> ACCAATAGAGACCCGGATGGGACTGCTACGGCCCATATAACCCGGCGGGGGGAATCCAATGACTATGG<br/> GTATGGGACTGGGGGTACTTACACTTAA</p> <p>CrLEA1-1</p> <p>CrLEA1-2</p> <p>CrLEA1-3</p> <p>CrLEA2-1</p> <p>CrLEA2-2</p> <p>CrLEA2-3</p>                                                                                                                                                                                                                                                                                                                                                                                                                                                                                                                                                                                                                                                                                                                                                                                                                                                             |

|          |                                                                                                                                                                                                                                                                                                                                                                                                                                                                                                                                                                                                                                                                                                                                                                                                                                                                                                                                                                                                                                                                                                                                                                                                                                                                                                                                                                                                                                                                                                                                                                                                                                                                                                                                                                                                                                                                                                                                                                                                                                                                                                                                                                                                                                                                                                                                                                                                                                                                                                                                                                                                                                                                                                                                                                                                                                                                                                                                                                                                                                                                                                                                                                                                                                                                                                                                                                                                                                                                                                                                                                                                                                                                                                                                                                                |
|----------|--------------------------------------------------------------------------------------------------------------------------------------------------------------------------------------------------------------------------------------------------------------------------------------------------------------------------------------------------------------------------------------------------------------------------------------------------------------------------------------------------------------------------------------------------------------------------------------------------------------------------------------------------------------------------------------------------------------------------------------------------------------------------------------------------------------------------------------------------------------------------------------------------------------------------------------------------------------------------------------------------------------------------------------------------------------------------------------------------------------------------------------------------------------------------------------------------------------------------------------------------------------------------------------------------------------------------------------------------------------------------------------------------------------------------------------------------------------------------------------------------------------------------------------------------------------------------------------------------------------------------------------------------------------------------------------------------------------------------------------------------------------------------------------------------------------------------------------------------------------------------------------------------------------------------------------------------------------------------------------------------------------------------------------------------------------------------------------------------------------------------------------------------------------------------------------------------------------------------------------------------------------------------------------------------------------------------------------------------------------------------------------------------------------------------------------------------------------------------------------------------------------------------------------------------------------------------------------------------------------------------------------------------------------------------------------------------------------------------------------------------------------------------------------------------------------------------------------------------------------------------------------------------------------------------------------------------------------------------------------------------------------------------------------------------------------------------------------------------------------------------------------------------------------------------------------------------------------------------------------------------------------------------------------------------------------------------------------------------------------------------------------------------------------------------------------------------------------------------------------------------------------------------------------------------------------------------------------------------------------------------------------------------------------------------------------------------------------------------------------------------------------------------------|
| CrLEA2-4 | AGATCAAAACATCTCCGAAAGAAAAATCATTCGCATAAGAAAGTTTCGTCCGTTGCTGCGGCTGTGTCAGTG<br>CCCTTGTGTTTGTATATTTGTAGTCAATATTTAGTCTTGGGCTTCACAGTTTACAATGTGAAAGAACCTGAA<br>GTAAGGATGAACAGGGTTATCCTTCTCAATAGAACTTTAGCTAACGGTGCTATCAATGACCTTACACTTCT<br>TGCTGATATCTCTTTGAAGAATTCAAACGCTTTCACCTTCAGGTTTGGATACACCAACACCACTGTTTACT<br>ATGATGGCAGCGAAATAGGTGAGGGAACATCTCCACCGGTAAGGCCAAGCAAGAAGGACAATAAGGTTTC<br>AACGTGACGATGGAATTTATGGCAAAGAAGCTTTTGGCTGTCCCAAGCTCGGAGAGTGACATCAGAGATGA<br>TCAAGCTTTGAATATCAGCAGCTATACCATGGTAGATGGTAAGGTCAAAATATACAATCTGTTTATGAAGA<br>AGGTTGTGGTTGAATTGAATTGTACAATTCAATACAACATCACCCTGGTTTGACCTCCTCAACCGGTGGC<br>AATTGCCCTCGGACTCGTTGATCTTTAG<br>ATGGCCACCAATATGCCTAAATTCAAGCGAAAACCTGGGAATGGGTGCAGATGGCCGCACCAACCCCATAGT<br>CTGGCTAATAGCCATTATCTGCACCATCATAGCCGTAGCAGTGGTAGTTGCAGGCATTGCAGTGTATATAG<br>GTTACATAGTGATCCACCCAGGGTTCCTATCATCAGTGTACAGATGCTCATTTAGATTCTTGAGAAAT<br>GATTATGCTGGTCGACTCCAAACCCAAATCAGAATTGTTGTGACTGCAAAGAATGGGAATGCCAAGGCTCA<br>TGCAACATTTTCTAAGATGACTTTCAACATTAGCTACCAAGGCCAAGATATAGCTGTGCTTGTGACAGACC<br>CATTGAGGTGCCAAGAACAGTTCCAAAGAGCTCCATTATGTTGTACAATCATCTCTCCATACCATTAAAT<br>CCTGATCAGATGGAGGAAGTGACTAATGCATGGAAACAGAATGAGATTGAGTTTGATTTCAAAGGAGCTGC<br>AAGGACACAGTGGAGGGTAGGGCCTTTAGGCTCTGTTAAATTCTTGTGTCATCTGGATTGTGACCTCAAGT<br>TTCGCCCCCTGAATGGGTCTTACGTACCCTCGCATTCACCTCCAAATCAAAATGA<br>ATGATGAGTGGAAAGAGAAACGTAGTTAGAGTTTCAGAGGAGGGTGAAGCAACAAGTAGGCAGCAGCAACT<br>GTATCAGCGGCAACGCCACCATCGTCTCATTCCTCCACCTGTAAAGGGTCTCGCTGCTCTTCTCTCC<br>TCTTCTCTTCTCGGTCTCTTAGTCTTAGCAGCACTGCTACTCATCGTGTGCTGTTAAGCCAGGAAC<br>CCTCACTTGGACCTTTCCCAAGTGGGCTTCCAGTATATGGCCATCAGGCCCAACCCCAACGATCCAGCAAC<br>AGCCAGTCTCTACCTTATCATCAGTGTGGTGTGTCGGTGGTGAATCCCAACAGGGTTAGGATCAGGTACG<br>GGGAGTCCAGGTTAAGCCTCATGTTCCGCGGTGTGACGTTGGGGCGGGCCTCGGTGCCAGCTTTCTCCAG<br>CGTGCTCACAGCGTGACGGAGGTGGTGGCCACCGTCGCCGTGATGGGGTCAACTTATCTGAGGCTGATGC<br>TGCTGACTTCACCAAGAGACGCTTTGTTGAATGACCGGGTGCAGCTTCGGGTCTTGGGCCATGTTGCGGCCA<br>AGATTGCGCTCTTCAACCTCTATTCTCTCTCTTTCAGGTGTGCGTGAATTGTGTTATAGTGATAAGTCCA<br>AGAAAGCAATCTCTTACTTATAAGCAGTGTGGATTGGAGGGATTGAATGTTTGA<br>ATGACCGAACCATCATCAAACCCAAACGGAAACGGCGCAATTAACGGTGTGCCACCACTACTAACGGCAA<br>CCCTGGTCCCGTTAAGTCCCAACTCTACAACCCAAACCGTCAACTTTACCAGCCACAATCCCACTACCACC<br>GTCGTCAACGCTCTCACCGAAACCTCTGCTGCTGCTGCTGCTTCTGGACCATCTCACCCCTCTCGCCGTC<br>GCTCTCTCGCCGCAATTGTGCGGCCCGCACTGTACGTACTGTACCGCCCTCAGGATCCCGAATCTCCGT<br>CACAAACCTCCGATTCGGAAGATGAACCTCACAACTCGAGCGACTCACCTCCCACTCACACGCTCT<br>TCAACCTCACTCATCTCCAAGAATCCGAACAACCACTCGTCTCTTCTACGATCCCTTCACCGTCAAC<br>GTCTTCTCTAACTCCGTCGCCGTCGGAAACGGTTCCCTAACGGCGTTTACTTCGGACAAGAACAACGAGC<br>TAGTATTTCGCACGTGCTGTGCGAGCTATCGCCGCGCCACCAAGATCTGGACACGGAGTGTGATCAATCT<br>TGAAGAAGAAGGGTTTCCCGTGGAGATTGATGGACACTAAGGTGAAGATGAAGATGGATTGGCTCAAG<br>AGCAAGAAGGTGCGGATTAGAGTCACTGTGATGGAATCAAAGGCAACCGTTCCCGCGGTGAAGACGCCGGC<br>GGTTGCTTCCGTTATCAACTCTGACTGTAAGGTGATCTTCGAATCAAGATCTGGAAGTTCTCTTTCTAG<br>ATGGAGGAGCGGGTGTCTGCGAGCTATCGCCGCGCCACCAAGTAGTACAATCTCCTCAAGACCCCATC<br>TATACAGAACCATAGTAGCAAAGCACTCCAATTATCCCCGAATTGGACCCCGGCACATACGTTGTCGGG<br>TTCCAAAGGACCAAGTCTACCGTGTTCACCGCCGGAATGCGGAAATCGCGGAGCTCCATCGGAGCACT<br>CCCCAAAAGAATACAAGAGGACGCGTGTGCTGGTGTGTCACGTGTTTCATTGCTGTTATAATTGTCAATTT<br>GATCATAATTGGAGGCATTTTGGGTGGGCTTTTCTCTGTTGTACTTAAACCAAGACCCCTGAGATTTCGA<br>TCCAACACTTTAATGTCTTAAAGGCACTCCCAAAACCCAAATACAACATCACTTTACAAGCCACAATCCA<br>AATTCTAAAGTAGGCATTTTGGTACAAGAAGGAGGCCACGTTTCATTGTCTTTAAGGCCGAAGAGATTGC<br>TTCAGGATCCTACCAAGTTTTCATCAAACCCCTCATGATTCAACACCCCTTTGGCGTTACTTTAAAGCCT<br>CAAAAGCTGTTTTCCTAAGGAGGTGGAGGAAAGCATCAAAATCATAAACCAAAAGTGCAATGTCGCAATC<br>TCATTAACCATTCACGTCCAGCACGAATGAAATGGGATTGTTGCGTAGTGGGACAATGCAATTCGACGT<br>TACGTGTCAGGTGACGTTGGATTCTTGGCCAAAACCCCTCGTGTACTTTCTCAACATGTCAAACATAAC<br>GACACTAG |
|          | ATGTCTCAAATCACAATAAAATCTCCAAAACACTGTGCTACCAAGCAAGGACTGAAAATTTAGAGGAACTA<br>CAAGAAACTCTTCTATGTTTTTTCAGCATTTTTTACCTCAATCCTATTGTTAATACTTCTTATCTGGCTCA<br>TCCTTCACCCTTCCAAGCCTCAATTCTCCCTCAAACAAGTTGACATCTACAGCTGAAGTTGTACAGGACCA<br>AACCTCAACTCCTCCATCCAACCTCACTCTCTATCCAAGAATCCAACCAGAAAGTTGGTATTTACTATGA<br>TGAATTTCAAGTTTATGCAACCTATAAGGGTCAGCAGATAACTGGTGACACCCCTGTGCTCCCTTTTACC<br>AAGGACAAGAAGAGAATAATCTCTTAAACAGCCTCTTTGGTAGGAAATGGGTTACCAGTGGCTCCTTCTCTT<br>GGTTATGAAGTGGGTGCTGATCAAACCTGTTGGAAGACTAGTTTGAATGTCAAAGTTAATGGAAAGCTTCG<br>TTGGAAGGTGGCAACTTGGGTCTCTGGACGTTACAGGTTCAATGTTAATTGTGTTCAATCATTGCCTTTG<br>GACCTTCAGCTCCTCTCACTTCAAAGCAGGGAGCTCGGTGTTCTACCACAATTTAA<br>ATGAAAGCAGGATCTGGTAAAGGGAGAAAAGTTTGCCTGACAGTGACAGGTGTTGTGATTGCAATTGTAAT<br>GCTAATGGTGATACGATGACGTTGACGGTGTCAAAGCCAAGCATCCTGTTACCACAGTGGACTCAGTGATGC<br>TGCAGGACTTCCACATGAGCTTGGATATAGCAAACTAAAGGTAGATTGAAATGTGACCTGGACGTGGAT<br>GTCTCTGTGAAGAACCCAAATAAGGTGGGATTCAAGTACTCAGACAGCACCGCCACCTCAATTACAGAGG<br>GCAGCTGATAGGTGAAGTCCCAATCTCAGCTGGAGAGATTCTTCTGTTGAGACCAAGGATTCAACCTCA<br>CCCTCACCAATTATGGCCAGCGTTTGATCTCCAATGCCAGCTTTACTCTGATTTTCAATCTGGTACATTG<br>CCCCTAAACACTTTTCAATTAGGATTTCTGGCAAAGTCAGCATCTTAGGCTTTATCAAAGTCCATGTGGTTTC<br>CTCCACATCTGTGATTTTGCGGTTAATCTTTCCAATAGAACAGTTGGAAACCAAGAGTGCCAATACAAGA<br>CGAAACTTTGA                                                                                                                                                                                                                                                                                                                                                                                                                                                                                                                                                                                                                                                                                                                                                                                                                                                                                                                                                                                                                                                                                                                                                                                                                                                                                                                                                                                                                                                                                                                                                                                                                                                                                                                                                                                                                                                                                                                                                                                                                                                                                                                                                                                                                                                                                                                                                                                                                                                              |
|          | ATGATCTTATCGACACGTTTGTAGACGTTGATTAGTGGCAACAGAGAGGTACGTCGACACGATCATCA<br>CGTGTGCGGATGGGACGAGACGTGTGGTATACGTGCTGAGGACGAGAACCTCTGTGTAATAAGCCAAGG<br>ACTTCGTGTCCGAGAAGATCAACAACGTGGCCAGCCTGAGGCGAGTGTACCCGAGCTCGACTTCAAGCGC<br>GTGAGCAGAGATAGCATCGAATACTTGGCCAAAGTCTCTGTTCGCAATCCTTATTCAACTCCAATACCAAT<br>CTGTGAGATCAAGTACTCTTTCAAAGCGCGTCAAGGGAGATAGCATCAGGCAGAATGCCAGACCCAGGAT<br>CGCTGAAGGCAAGGATACGACAATGGTGGAGGTACCAAGTGAAGTGCCATATAGCATATTAATGAGTTTA<br>GCTAAGGATATTGGAGCTGATTGGGATATTGACTACCAACTGGATCTGGGTCTCGTTATTGACCTTCTGTC                                                                                                                                                                                                                                                                                                                                                                                                                                                                                                                                                                                                                                                                                                                                                                                                                                                                                                                                                                                                                                                                                                                                                                                                                                                                                                                                                                                                                                                                                                                                                                                                                                                                                                                                                                                                                                                                                                                                                                                                                                                                                                                                                                                                                                                                                                                                                                                                                                                                                                                                                                                                                                                                                                                                                                                                                                                                                                                                                                                                                                                                                                                                                                                                                                              |
|          | CrLEA2-5                                                                                                                                                                                                                                                                                                                                                                                                                                                                                                                                                                                                                                                                                                                                                                                                                                                                                                                                                                                                                                                                                                                                                                                                                                                                                                                                                                                                                                                                                                                                                                                                                                                                                                                                                                                                                                                                                                                                                                                                                                                                                                                                                                                                                                                                                                                                                                                                                                                                                                                                                                                                                                                                                                                                                                                                                                                                                                                                                                                                                                                                                                                                                                                                                                                                                                                                                                                                                                                                                                                                                                                                                                                                                                                                                                       |
|          | CrLEA2-6                                                                                                                                                                                                                                                                                                                                                                                                                                                                                                                                                                                                                                                                                                                                                                                                                                                                                                                                                                                                                                                                                                                                                                                                                                                                                                                                                                                                                                                                                                                                                                                                                                                                                                                                                                                                                                                                                                                                                                                                                                                                                                                                                                                                                                                                                                                                                                                                                                                                                                                                                                                                                                                                                                                                                                                                                                                                                                                                                                                                                                                                                                                                                                                                                                                                                                                                                                                                                                                                                                                                                                                                                                                                                                                                                                       |
|          | CrLEA2-7                                                                                                                                                                                                                                                                                                                                                                                                                                                                                                                                                                                                                                                                                                                                                                                                                                                                                                                                                                                                                                                                                                                                                                                                                                                                                                                                                                                                                                                                                                                                                                                                                                                                                                                                                                                                                                                                                                                                                                                                                                                                                                                                                                                                                                                                                                                                                                                                                                                                                                                                                                                                                                                                                                                                                                                                                                                                                                                                                                                                                                                                                                                                                                                                                                                                                                                                                                                                                                                                                                                                                                                                                                                                                                                                                                       |
|          | CrLEA2-8                                                                                                                                                                                                                                                                                                                                                                                                                                                                                                                                                                                                                                                                                                                                                                                                                                                                                                                                                                                                                                                                                                                                                                                                                                                                                                                                                                                                                                                                                                                                                                                                                                                                                                                                                                                                                                                                                                                                                                                                                                                                                                                                                                                                                                                                                                                                                                                                                                                                                                                                                                                                                                                                                                                                                                                                                                                                                                                                                                                                                                                                                                                                                                                                                                                                                                                                                                                                                                                                                                                                                                                                                                                                                                                                                                       |
|          | CrLEA2-9                                                                                                                                                                                                                                                                                                                                                                                                                                                                                                                                                                                                                                                                                                                                                                                                                                                                                                                                                                                                                                                                                                                                                                                                                                                                                                                                                                                                                                                                                                                                                                                                                                                                                                                                                                                                                                                                                                                                                                                                                                                                                                                                                                                                                                                                                                                                                                                                                                                                                                                                                                                                                                                                                                                                                                                                                                                                                                                                                                                                                                                                                                                                                                                                                                                                                                                                                                                                                                                                                                                                                                                                                                                                                                                                                                       |
|          | CrLEA2-10                                                                                                                                                                                                                                                                                                                                                                                                                                                                                                                                                                                                                                                                                                                                                                                                                                                                                                                                                                                                                                                                                                                                                                                                                                                                                                                                                                                                                                                                                                                                                                                                                                                                                                                                                                                                                                                                                                                                                                                                                                                                                                                                                                                                                                                                                                                                                                                                                                                                                                                                                                                                                                                                                                                                                                                                                                                                                                                                                                                                                                                                                                                                                                                                                                                                                                                                                                                                                                                                                                                                                                                                                                                                                                                                                                      |
|          | GCTAAGGATATTGGAGCTGATTGGGATATTGACTACCAACTGGATCTGGGTCTCGTTATTGACCTTCTGTC                                                                                                                                                                                                                                                                                                                                                                                                                                                                                                                                                                                                                                                                                                                                                                                                                                                                                                                                                                                                                                                                                                                                                                                                                                                                                                                                                                                                                                                                                                                                                                                                                                                                                                                                                                                                                                                                                                                                                                                                                                                                                                                                                                                                                                                                                                                                                                                                                                                                                                                                                                                                                                                                                                                                                                                                                                                                                                                                                                                                                                                                                                                                                                                                                                                                                                                                                                                                                                                                                                                                                                                                                                                                                                        |



|           |                                                                            |
|-----------|----------------------------------------------------------------------------|
| CrLEA2-11 | CATTGGCAATTTACCATTCCTCTCTCTCACACGGAGAGGTCAAGCTACCAACCTCTCTACTATGTTCTGCTTAG |
|           | ATGGCAGAGAGAGAGCAGGTTAGACCCCTTAGCTCCATCCATAGATCGTCCAAGCAGCGACGAGGACGACAC   |
|           | CACCTCTACACCGCACATCACCCTGCTCGTACAAAATTCATCAAATGGTGGGCTTGTCATTAGCTTTCTTAC   |
|           | TTCTTCTAGCAATTATAATCATAGTTTTAATATTACCGTGTTCATGTCAAGGACCTGATATCAGAATG       |
|           | AACGGTGTCAAAATCACAAAGCTAGAACTTGTCAACACCTTAACCCCTAAACCTGGGGCTAACATGTCCTT    |
|           | AATTGCAGATGTATCGGTGAAAAACCTAACGTTGCATCCTTTAGGTATAGTAACACCACCACAAGTTTGT     |
|           | TCTATCATGGCATCATGGTGGGAGAGGCTAGAGGACCCCCAGGGAGGGCCAAGGCTAAACGAACAATTAGG    |
|           | ATGAATGTTTCAATTGATGTCATCAGGATCGTATTGTGTCTAATCCTGATTTTAGGACAGATTTCTGTTT     |
|           | AGGGTTGTTGACTATGACCAGCTTCTCCAGAGTTCAGGGCAGGTTAAGATCTTGAACCTTGTTCAGAAAC     |
|           | AATTGTGGTCAAAATGAATTGTACCACCACTTTCAATATTTCTACACAGGGAATTCAAGAACAGAGTTGT     |
| CrLEA2-12 | AAGCGCAAGCAAAAGACAACCTTGCTCTACAATCTCTCCATTTGGGGCTACCAATTTCTTGAAAGTTATTAT   |
|           | TTCATATGGCACTAAGCAAGATTTGCGTGAATCTGA                                       |
|           | ATGCAAAATACACGATCAAGAAGAACCAACCAACACTCACAAAACCAACCTCATATTTCCGTGTCAA        |
|           | AGTGCCCTCAACAACAACACTACAACATGGACAAAGGTATCCCTCCTCGCTTCAAAACCAATGCCCCAAAAC   |
|           | GTGAACACTGCATTTGCATCAGTTTTTCTCCTTCTACTTGGCATCATTTACTCCTCTGGCTCGCT          |
|           | TACCACCTTCCAAGCCACGCTTACGGTGGCCAGCGCCGCCATCTATGGCGTCAACACCACATCACCGCC      |
|           | ACTCATGTCCATCACAATGCAATTCAATATCCTCATTAGGAACCCAAACAGCGTGTCTCAATCTACTTTG     |
|           | ACAGACTCTCTGCTTACGTGTCTTACAGAAACCAACCAATCAGCCACGTGTCTGCTGCCACCACTCTTC      |
|           | CTCGAGAAACACAGCGCCGTGTCGCTGTGCGGGAGATCGGAGGCGTGCCGGTGGCGGTGTCGGAGGAGGT     |
|           | CTCAAAATGGATTGGCAATGGATGAGAGTTATGGGGTGGTGGCTGTGAAGCTTATGTTTCTTGGAAGGTTAA   |
| CrLEA2-13 | GGTGGAAAACCTGGTGACATAAACTCTGCACATTATGGATTGTATGTCAAATGTGACGTGTTAATGGGTTTG   |
|           | AGGAAAGGTTTTGTGGGTGAGGTTCCCTCTTCTCGGAGCTCCGGTTTTGTGAAGTGAATACTTGA          |
|           | ATGACTGATAGAGTCCATCCCTCCGCCAACGGCGGAAAAACCGCCACATTTCCCGCCACAAAATCTCAACT    |
|           | TTACGGGCCACCCGTCCCTCCTACTGCCCAACCGTATCACCAACGCGTAGCAGCAGTCGGGATGGT         |
|           | GTTGCAGCCTCTGCCTCTGCCTCATCTCCTCCTCTCTCCTCCTCCTCATCGGCGCGCCGCCACG           |
|           | GTCGCGTACTTCTCTACCAACCTCAACGACCTTCTTCTCCGTACCTCTCTGAACTCTCGTACCTGAA        |
|           | ACTCACCTTCTCCTCGACTCTTAATTCCAAAGTTTGAGCTCAAACCTCTCAGCCACAACCCCTAACACAACAA  |
|           | TTGTCTTCTCCTACGACCCACATCCGTCTCCATCTCTCCAACGAAGACATCGACATCGCACACGGCACC      |
|           | ATTCCTCCTTCCGCCACTCCCAGAGGAACATCACGATCCTCAAAGTTTCCATTGCGAGCAGCGAGGAAAG     |
|           | CGTGGAGAGCGACGCCGCGATGCGGCTGAAGGGGATCATGAAGAGCAATAGCGGGTTGGCGCTGAAGGTGA    |
| CrLEA2-14 | AAATTGGAGACGAAGGTGCAGGCCAATATGGGTGTGCTTTCACACCCCAAGTGTCCCGTTACTGCTTCTGT    |
|           | GATGGCGTCGCCGTACACTTCCCAGCGGAGATAAACCGGCGACGGCGTCCATCGCGAACACGGAGTGCAA     |
|           | CGTGGATGTGAGGTTCAAGATATGAAATGGACCGTTGGATGA                                 |
|           | ATGTATGAGAAACAACCCCAATTGAACGGAGCCTACTATGGCCCTTCAATTCGCCACCAAAAATCTTACCA    |
|           | TCGCCAGGGCGCGCGGCTGCGACTGCTGCTGTGGTGTATCTTCAGCCTGATCTTCAAACCTGATCC         |
|           | TGACGGTGATCATCATCGTTGGAATCGCCGTCTTCTGTTCTGGCTCATCGTTCGACCCAACGTGGTGAAG     |
|           | GTTACCGTGACGGAGGCGACCCCTGACGGAATTCAACTACACGGGGAACACCCCTATACTATGACTTGGCTCT  |
|           | GAACATGACAATTTCGCAACCCCAACAAGAGGCTGGGTATCTACTATGATCGCATCGAAGCCCGTGAATTT    |
|           | TCCAGGATGCAAGGTTGGCACTCCAATTCCTGGAGCCCTTCTATATGGGCCACAAGACCAACCAAGCTTTTG   |
|           | AATCTGCGTTCAAGGGTACCAGGTGGTTCCTCAACACTGACCAAACTGCGGAATTGAAGAAGGAGAA        |
| CrLEA2-15 | CAGCACCGGATTTACGAGATTGATGTGAAGCTGTACCTCAGGGTGAGATTCAAAGTTGGGAGTGTTCAAGA    |
|           | CCAAGACGCTCAAGCCTAAGGTTACCTGTGACTTACGCGTGCCTTTCACCTTACCTAATGGACCCCTGCCA    |
|           | GCGCTCGGTGCTTTCCAGACTACCAAGTGCATTTGGGATCGTTGA                              |
|           | ATGGCCGATAAGCAACCTCAGCTGAACGGTGCCTTTTACGGTCTGCCATTCCCCCACCAGCGCAGCAACC     |
|           | ACGCTACCATCGCCACCACCGGGCCGAAGCTGCTGTGTGCTGCTCTTCGGAATCTTCTGGAAGATTCTGG     |
|           | TTGCGCTCATTTGCTTGGCAGGCTTGGCAGGCCTCATCTTCTACCTGGTGGTTCAACCCCGCTCCTTCAAG    |
|           | TTCTACGTACGGAAGCCAACTTAACTTCAATTCGAATACACAGCAACAACAACCCCTAACTACGCAAT       |
|           | GGTACTCAACTTCACTGCCCGCAACCCCAACAAAAGCTGAGCATCTACTACGACAAAGTGGAGGCTTTAA     |
|           | CATTCTACGAAGGAGCCAGGTTTCAAGCAATTACGATGTATCACGCACTTCAACTCATTCGGCAGTATAAG    |
|           | AAGAGCAGCAGCCCCATGAGCGGCTTTTCAAAGGGAACAGAGTGGTGGTGTGGAACAATGACGAGCTTTC     |
| CrLEA2-16 | TGAGTTAAACAGAGACAGAAATGAAAGGGTTTATGATATCTATGTGAGGCTGTACTTCAAGTACTAGGTTCA   |
|           | GACTCGGTGACGTATATCCAGGGACTTCAAGCCCAAGGTCAAATGTACCTCAAAGTTCCTTAGCTTCT       |
|           | ACCACCACAACTCTGTTTACGCCCAACAGTGCAGCTCGATTTCTAG                             |
|           | ATGTCGGTGAAGGAGTGTGACCACCACAAGGGGAAGAAGCACAAAATCTTCCGGCGCATCTTCTGGGGCAT    |
|           | AGTGATCTTCGTGTTTATCGTGTGTTAACAATTTGATAATATGGGCAATCCTTAAAGCCTACGAAGCCAA     |
|           | CCTTCATCTTCCAAGACGTACCCGTTTACGCCCTTCAACGCAAGCATCCCCAACCTCCTCACTCCAATTTT    |
|           | CAGGTGACACTCTCCTCTCGTAATCCCAACGACAAAATCGGCATCTACTATGACCGTCTCAATACATATGT    |
|           | CACTTACCGGAACAGCAGGTACCTACCCGCACTTCCATTCCTCCTCTTACCAAGGTACAAGGAAGAGG       |
|           | ACGTCTGGTCACCGTTTGTTCAGGTACTAATGTCCCCGTGCTCCCTATAAATTTGCTGCGCTCAGTCAA      |
|           | GACCAAGTCTAACGGTAACGTCTCGTTATCGTTAAAAATTGACGGCAAGGTCCGTTGGAAGGTGCGTGCCTT   |
| CrLEA2-17 | TATCTCCGGCCATTACAACCTCTATGTACGCTGCCCTGCTTTCATCACATTTGGCCCTCGGAGTAACGGAA    |
|           | TTGCCATTGGCGATAACGCTGTTAAGTATCAATTGGTTTACGCTTGCACCGTTGGCGTTTGA             |
|           | ATGGAAAAGGACAAAATTTCCGGTTACCCAAACGTGCAGTGTGCACATGCATCAAAATCTTCTTCTGTT      |
|           | AGTCGCCATCACTCTCCTCGTCTCTGGCTCGTCTACCGTCCCCACAAGCCTCGCTTCGTGGTGGTGGCGG     |
|           | CCGCCATCTACGGCCTCAACACAACCAACCCCTCCCTCATGTCTGCCACCATGCAGCTCACCCTCCTCATT    |
|           | AGGAACCCAAACAGGCGCGTCTCCGTTTACTATGACAGATTCTCCGCCTTCGTTTCTACAGGAACCAAGC     |
|           | CATAACGCCCTCAGGTTGCGTGCACCCGCTGCACACGACAAGCAGCAGCAGGTCACACTTCGCGGCTGA      |
|           | TCGGAGGCACGGCGGTTCCGGTGTGCGTGGAGGTGTCAAAATGGGTTGATGGTGGACGAGGCTTATGGGGTG   |
|           | GTGGGTCTGAAGCTGACTTTTCAGGGAAGGGTGAGGTGGAAGGCTGGAGCCATCAAACTGCACACTACGG     |
|           | ACTGTATGTCAACTGCAACTTATTGATGGGTTTGAAGAAAGGTTTTGTTGGTCCAGTTCCTCTCCTCGGAG    |
| CrLEA2-18 | CTCAACCTTGCATGTCGATTATGA                                                   |
|           | ATGGATGTTTCCGCTTCTAATTCCGATTGCTTCTGGTGGAAAGAACTTCATCCCGGATTTTCTTTTAAAAA    |
|           | ATGCTGCTTCTTTCTGCTTATCTTCTTTTATCATCATGCATGGTGGTGGATTAGCCACTTTTTTTGTGA      |
|           | TCCTCATCGTTAGCCCCACAACCGGTTTTCTCTGTTAGAGAGGTTCAAATAAATTTTTACAAGATTGAT      |
|           | GATCGTTCTAATCTGACACTGTTGGTTTTCTCTGTAATCTCCTTAACCTCAATGCAGAAAATCATAATAA     |
|           |                                                                            |

|           |                                                                                                                                                                                                                                                                                                                                                                                                                                                                                                                                                                                                                                                                                                                                                                                                                                                                                                                                                                                                                                                                                                                                                                                   |
|-----------|-----------------------------------------------------------------------------------------------------------------------------------------------------------------------------------------------------------------------------------------------------------------------------------------------------------------------------------------------------------------------------------------------------------------------------------------------------------------------------------------------------------------------------------------------------------------------------------------------------------------------------------------------------------------------------------------------------------------------------------------------------------------------------------------------------------------------------------------------------------------------------------------------------------------------------------------------------------------------------------------------------------------------------------------------------------------------------------------------------------------------------------------------------------------------------------|
| CrLEA2-19 | GTTTGGTATAGGTTTTAGTCCATCAAGGTTCCCTTGTATTATCAAGAAGGCTTGCATATAGGAAGTATTCGAG<br>TTCCATGGTTTTTTCAACCTCCTCACACTGAAATGTGACCGTACCATCTCGTGTCTTATGCAATGTGTT<br>AATCTCAGCAAAATGTGCGCAACACATCCTTACAAGAAATGTCAAAGCAAAACGCGCGCATCAAGAT<br>CACAGGGGATGCCAGAGTCCACGTGTGGGTACTTTCATATAAACTTTTTGAGATTAAGATTGCACATGATT<br>GTGGTATGAATTTAATATAAGAGAGTTTGCTTTTCAAAATGAAGCGTTTGGTGCCAAAATTAGCAAGAGT<br>GACTTGGGTTTCAAGTCTCAGTGATTCAAAAGGCATCTCTATGAAATGTGCTTCATCTGTCTACATATAA<br>ATGCTGTCATTAGCACCACAAACAGAAATCATGACAGAGCACAATAATGAGGATCAAGAGCAAGTGGT<br>GGTGATTTTCAAAAAAAGCTCAAGAGAAAGAAAGTGTGTGTAATTACCACAGGAGTAGTGTGTGTTACTTC<br>TTGTGGTGTCAATCATAGTGGGGCTTGTCTTGTGTTTGAAGTGTCTCAAGCTTAAAGATCAAGGGCAGAC<br>CTTGTCTTCTGCCACTTTGGAGGGTATAGCACCTCGTGTACACTTCTGCTATTGACATACAAATCAATGT<br>TACTCTTGATCTCAAGATTCAAGTTGAGAACAGAAACCATGTTAGTTTCAAGCATCAAGGAGGGAAGAGTG<br>TTTTGTTTATATGGAGGAAAAGAGGTTGGAGAGACTCAGTTATACCTGGTGTGATTCCTTCAAAGGTTCT<br>ACTATACTTCCCTGTAGACTCACCTTCAGGCAGAGAACTTGTCTCCAATTTTTCTGGTTTGGTTGAGGA<br>CTTGATGGGAGGACAAATCTCCATGGGAGCTGTTACTAGGATTCTCGGAGAGTTACCTTCTTGGATTCA<br>TAAAAAACATATTATTGCTAAGTCCAATTGCCAATTCACCTGTTAGTGTCTGACTTCAAGATCATTAGC<br>CAAGCTTGCAAGAAATAAGGCCAACTATGA |
|           | ATGATAGAAAAATATGGGCACCGCAAAAAGAGTAACATGTGCCTGGTGGTAACATGTATTGCAGTGATAGC<br>AATCTGCGGTAGCAACGATCTTAGTATCAACGATGTTAAACCAAGGCAACCTATAACCAAGTGGAAG<br>GCATAAGGCTTGATGACATGAATATGAACATGAATATGTTTAAAAATGAGGATGGATATTAACGTGACATTG<br>AAAGTGATATGTGCGTGGAGAACACAAATAAGTTGGATTGTGTACAATGAATGATTCCTTCAAAGGTTCT<br>CTATGGAGGGGAATTAATTGGGGAAGCCCCAATACCCAATGGAGAGATATTATCTGAGGAACTAAAGGAA<br>TGAACCTGACACTAACCATATGGCTGATCGCATGTTCTCCAATTCTCAAGCTTTCAAAGATGTTACAACG<br>GGTTCATTGCCCTCAACACTATTGTTAACTTTCTGGCCAAGTCATCATCTTGGGCTCATCAATTTTCA<br>TGTGGGTTCCACCTTATCTGTGATTTCAACCTCAATGTTTCCAATAGAACCATTGACCACAAAGAGTGTC<br>ACCATGACACAAAGATTGA                                                                                                                                                                                                                                                                                                                                                                                                                                                                                                                                                 |
| CrLEA2-20 | ATGAGAGTGGGTTTTGGGTGTGAAGGTGTGCTTGGGTGTGATCGGTGTGAGTCTGATATTGGCAGCGTTTTAA<br>AATGTCGGAGTTGTTGGACAAAGCCAAAACCTATGTTTCAGAGAAAGTGCCCAACATGCCCAAACCTGAGG<br>CCGCTGTGCTGACGTGGATTTCAAGCGCGTGAGTCGAGAGGGCGTCGAGTAGTTCGGCAAGGTCCTGTGT<br>TCCAATCCTTATCCCTCTCCCATTTCAATCTGTGAGATCAAGTACTCCCTCAAAGTGTCTGGCAGGGAGAT<br>AGCATCAGGACAAATACCAGATCCAGGGTGTGTAAGGCAAAAAGACACAACATGCTAGATGTGCCAGTGA<br>AGGTGCCTCATAGCATATTGTTAAGCTTGGCAAGGGACATTGGTAGAGATTGGGACATAGACTATCAATTG<br>GATCTTGTCTTAATTATTGACCTTCTGTGTTGGCAACTTCAGTATTCTCTTTCTCAGCAGGGAGAGAT<br>CAAACCTCCCCACCATCTCTGATATGTTTACCTAA                                                                                                                                                                                                                                                                                                                                                                                                                                                                                                                                                                                                     |
|           | ATGTGCAAAACCGTAGGCAGATTATTGGCCTTACTCTTGGTCATTATCCCCGTAACGGTGACCGTTACGGC<br>CTTTCTTTTTTGTCTCATTTGTGCGACCCAACGTCGTTAAATTTACAGTGACCGATGCTACCCTCGCCCAAT<br>TCAGTTACACTAATAACACCCCTTTACTACGATCTCACCCCTCATCGTGAAGTTTCGCAACCCCAACACAAAG<br>ATCAGAATCCACTATAACTACATGGAAGAAGTTGTGTTATACCAAAATGTGAAGTCTGTTCGCTGATCTT<br>AGGAACCTACATTAGCCACACAAGAACACTGCCATGTTGACTCCTGTTTTTAAAGGTCAACAAGTCATGT<br>CCCTCAACAAAGACCACATTTTGGAGACTTACAATAATGAGAAGCGTTCTGGGATTTACCACATCGATTTT<br>AAACTTTACTTTGAAGTTAAGTTTCGATTTTGGGTGTGTACAAAACCTAACAAATGAAATGCCAGGTGACTTG<br>TAACCTACAACCTCCCTCTTCAATCTTACAATGGAACCTCAACCGTGGTAGGTTTCAACTTACCCGCTGCA<br>ACTTCGATTACAAACATATTTTGTATTATTTCTGA                                                                                                                                                                                                                                                                                                                                                                                                                                                                                                                    |
| CrLEA2-21 | ATGGCTGATTATAAGCAACCCCACTAAACGGTGCATATTATGGCCCTTCCATTCTCTCAGCGGAGCCACC<br>ACGCCAACGCGCTCACCGCGGAGAAAGATGCTGTTGCTGCTCTTTCAGCTTCTTCTGGAAGTTTCTCCTCG<br>CAATCGCTGTCTCATTTGGCCTCGCCATCTCATCTTCTGGCTCTTAGTTCAACCACGCGCTTCAAGTTG<br>CACGTGACGGAAGCGAGTCTCACTCAATTCAACTACACCTCCAACACTCTCCAGTACAATCTCGTCTCAA<br>CTTCACGCGCCGAAACCTTAACAAAAAATCAACATCTACTATGACAAAGTGAGGGTTCAGTGTCTTACG<br>ACAGCGTACGTTTTGCTTCAACGGGATTTATCAGTGGCAAAACCTCGTTCCGTTGCAAGTACAGCAACG<br>AACCAGTATGAGCGGCGTGTCTCGGGGCAACGCGTGATTGTGCTTGATCATAATCGGGCTCAGATTTGGA<br>AGAAGATAAGAGAAGTGGGATTTTTACATTGATGTGAGGCTCTACTTCAACATTAGGTTGAGGCTTGGTG<br>ACTTCATATGGAATAGTGATATCAAGCCCAAGCAAGTGTGGGCTTAAGATTCTCTTTCAGTTTCAATGGG<br>ACTACGGTGAATGAGTTTTCGGCCCAACCAAGTGCATGTTGATTCTGA                                                                                                                                                                                                                                                                                                                                                                                                                                          |
|           | ATGTGCGGTGAAGGAGTGCGATCTTCAAGGGGAAGAAGAGGAAGATCTTCTGCGAATATTCTGGGGAAT<br>AATTGTCTTCTTTTCATCGTGCTGTTACAATCCTTATAATTTGGGCAATTCTAAGACCTCAAAACCTT<br>CCTTCATTCTCCAAGACGTCACCGTTTATGCCTTCAACGCCACCGTTCCCAATCTGTTAACTCAAAATTC<br>CAAGTCACACTGTCTCACGGAACCAACGATCACAATAGGCGTCTATTACGATCTTGGATGATATTATGT<br>CACTTACCAGAGCCAGCAAAATTACTTACCGCACCGCAATTCTCTCCTCTATCAAGGCCACAAAGAGATCG<br>ACGTTTGGTCGCGCTTTGTTTACGGCACCAACGTCCTCGTGCCTTTCAATTACGCGGCTCTTAGTCAG<br>GATCAGTCCAACGGTAACATCTCGTCAACATTAAAAATTGACGGCAGAGTTGCTTGAAGGTTGGCGCCTT<br>CATCTCTGGCGGTTACCACTCTACGTCCGGTGCCTGCTTTCATCAATTTTGGGACCCGGAATAACGGAA<br>TTTTCCGTTGGTGAACCGCGCATTAAGTACCAGCTTGTTCAGTCATGCTCCGTTAGCGTTTGA                                                                                                                                                                                                                                                                                                                                                                                                                                                                                                         |
| CrLEA2-22 | ATGGCAGATCATCAGAGACAAAGGATCCACCTATGGAGGTAGGAGCACCACCACCAACCATCCCAT<br>GGTACCTCCAGGTTTCTCAAGATCAGAAAAGGGTAACCCCTTACACCGTCCACCACAACCTACATGCTAGGC<br>CAGCAATATACCTTACCAAAAAAAGGAACTGCTTTTGCAAGTGCATATGTTGACTCTATGCTGGTT<br>TTCCTCCTGCTCATTATCTTGGCAGCAACTGTTGGAATCCTTTACCTAGTTTTCAAAACAAAACCTTCCCAA<br>TTACTCAGTTGAAACACTGAGGATAAGTGATCTTAGGCTCAACTTGAATTGAGTCTGTATGCAAAAGTTG<br>ATGTGAAGATCACAGCAAAATAACCAAAATAAAAGATTGGTATTTACTATGAGGAAGGTGGGAAATTGAGT<br>GTGTGTACAGAAAGCAAGACTTTGTGAAGGGTCAATACCAAGTTCTACAGGTCATCAGAACAAAC<br>AGTGCTGAATGTGTCTTGTGACTGGTCAAGTGCAATCTGGAAGCACCTTAATGACGGCATCGACGCAAC<br>AGCAACAGGACGCATTCCATTGGATCTCAAAGTGCATGACCAGTTGCCATCAACTTGGGAGGTTCAAG<br>CTGAGGAAGGTGAGAGTCTTGGGTGAATGCTGTGTTGGTTGGATAGCTTATCATCTAATAATCTCATAAC<br>CATCAAGGCTAGCAACTGCAATTTCAATGAACTTTAA                                                                                                                                                                                                                                                                                                                                                                                    |
|           | ATGCGCAGCAATGACCACATACCCGTTTCATCATGTGCGGGACCGAACCCGAAACCCATGAAACGACACCG<br>TACCGCTCGGTACTACGTTTCATCGGGTCCATGAAAGCCTCACAACCCGCTGTCCAAGATAATCTGCGCCA<br>CTTTCTTGGGCTTACTTGCCATTGTGGGCTCATCACCTTCATCTCTGGCTCAGCTCCGGCCCCACCGG<br>CCCAGGTTTCATATCCATGAATTCAACATGCCGGGCTGACCCAACAATCCGGGTTGAAATGCCCGGAT                                                                                                                                                                                                                                                                                                                                                                                                                                                                                                                                                                                                                                                                                                                                                                                                                                                                                |
| CrLEA2-23 | ATGATAGAAAAATATGGGCACCGCAAAAAGAGTAACATGTGCCTGGTGGTAACATGTATTGCAGTGATAGC<br>AATCTGCGGTAGCAACGATCTTAGTATCAACGATGTTAAACCAAGGCAACCTATAACCAAGTGGAAG<br>GCATAAGGCTTGATGACATGAATATGAACATGAATATGTTTAAAAATGAGGATGGATATTAACGTGACATTG<br>AAAGTGATATGTGCGTGGAGAACACAAATAAGTTGGATTGTGTACAATGAATGATTCCTTCAAAGGTTCT<br>CTATGGAGGGGAATTAATTGGGGAAGCCCCAATACCCAATGGAGAGATATTATCTGAGGAACTAAAGGAA<br>TGAACCTGACACTAACCATATGGCTGATCGCATGTTCTCCAATTCTCAAGCTTTCAAAGATGTTACAACG<br>GGTTCATTGCCCTCAACACTATTGTTAACTTTCTGGCCAAGTCATCATCTTGGGCTCATCAATTTTCA<br>TGTGGGTTCCACCTTATCTGTGATTTCAACCTCAATGTTTCCAATAGAACCATTGACCACAAAGAGTGTC<br>ACCATGACACAAAGATTGA                                                                                                                                                                                                                                                                                                                                                                                                                                                                                                                                                 |
|           | ATGAGAGTGGGTTTTGGGTGTGAAGGTGTGCTTGGGTGTGATCGGTGTGAGTCTGATATTGGCAGCGTTTTAA<br>AATGTCGGAGTTGTTGGACAAAGCCAAAACCTATGTTTCAGAGAAAGTGCCCAACATGCCCAAACCTGAGG<br>CCGCTGTGCTGACGTGGATTTCAAGCGCGTGAGTCGAGAGGGCGTCGAGTAGTTCGGCAAGGTCCTGTGT<br>TCCAATCCTTATCCCTCTCCCATTTCAATCTGTGAGATCAAGTACTCCCTCAAAGTGTCTGGCAGGGAGAT<br>AGCATCAGGACAAATACCAGATCCAGGGTGTGTAAGGCAAAAAGACACAACATGCTAGATGTGCCAGTGA<br>AGGTGCCTCATAGCATATTGTTAAGCTTGGCAAGGGACATTGGTAGAGATTGGGACATAGACTATCAATTG<br>GATCTTGTCTTAATTATTGACCTTCTGTGTTGGCAACTTCAGTATTCTCTTTCTCAGCAGGGAGAGAT<br>CAAACCTCCCCACCATCTCTGATATGTTTACCTAA                                                                                                                                                                                                                                                                                                                                                                                                                                                                                                                                                                                                     |
| CrLEA2-24 | ATGTGCAAAACCGTAGGCAGATTATTGGCCTTACTCTTGGTCATTATCCCCGTAACGGTGACCGTTACGGC<br>CTTTCTTTTTTGTCTCATTTGTGCGACCCAACGTCGTTAAATTTACAGTGACCGATGCTACCCTCGCCCAAT<br>TCAGTTACACTAATAACACCCCTTTACTACGATCTCACCCCTCATCGTGAAGTTTCGCAACCCCAACACAAAG<br>ATCAGAATCCACTATAACTACATGGAAGAAGTTGTGTTATACCAAAATGTGAAGTCTGTTCGCTGATCTT<br>AGGAACCTACATTAGCCACACAAGAACACTGCCATGTTGACTCCTGTTTTTAAAGGTCAACAAGTCATGT<br>CCCTCAACAAAGACCACATTTTGGAGACTTACAATAATGAGAAGCGTTCTGGGATTTACCACATCGATTTT<br>AAACTTTACTTTGAAGTTAAGTTTCGATTTTGGGTGTGTACAAAACCTAACAAATGAAATGCCAGGTGACTTG<br>TAACCTACAACCTCCCTCTTCAATCTTACAATGGAACCTCAACCGTGGTAGGTTTCAACTTACCCGCTGCA<br>ACTTCGATTACAAACATATTTTGTATTATTTCTGA                                                                                                                                                                                                                                                                                                                                                                                                                                                                                                                    |
|           | ATGGCTGATTATAAGCAACCCCACTAAACGGTGCATATTATGGCCCTTCCATTCTCTCAGCGGAGCCACC<br>ACGCCAACGCGCTCACCGCGGAGAAAGATGCTGTTGCTGCTCTTTCAGCTTCTTCTGGAAGTTTCTCCTCG<br>CAATCGCTGTCTCATTTGGCCTCGCCATCTCATCTTCTGGCTCTTAGTTCAACCACGCGCTTCAAGTTG<br>CACGTGACGGAAGCGAGTCTCACTCAATTCAACTACACCTCCAACACTCTCCAGTACAATCTCGTCTCAA<br>CTTCACGCGCCGAAACCTTAACAAAAAATCAACATCTACTATGACAAAGTGAGGGTTCAGTGTCTTACG<br>ACAGCGTACGTTTTGCTTCAACGGGATTTATCAGTGGCAAAACCTCGTTCCGTTGCAAGTACAGCAACG<br>AACCAGTATGAGCGGCGTGTCTCGGGGCAACGCGTGATTGTGCTTGATCATAATCGGGCTCAGATTTGGA<br>AGAAGATAAGAGAAGTGGGATTTTTACATTGATGTGAGGCTCTACTTCAACATTAGGTTGAGGCTTGGTG<br>ACTTCATATGGAATAGTGATATCAAGCCCAAGCAAGTGTGGGCTTAAGATTCTCTTTCAGTTTCAATGGG<br>ACTACGGTGAATGAGTTTTCGGCCCAACCAAGTGCATGTTGATTCTGA                                                                                                                                                                                                                                                                                                                                                                                                                                          |
| CrLEA2-25 | ATGTGCGGTGAAGGAGTGCGATCTTCAAGGGGAAGAAGAGGAAGATCTTCTGCGAATATTCTGGGGAAT<br>AATTGTCTTCTTTTCATCGTGCTGTTACAATCCTTATAATTTGGGCAATTCTAAGACCTCAAAACCTT<br>CCTTCATTCTCCAAGACGTCACCGTTTATGCCTTCAACGCCACCGTTCCCAATCTGTTAACTCAAAATTC<br>CAAGTCACACTGTCTCACGGAACCAACGATCACAATAGGCGTCTATTACGATCTTGGATGATATTATGT<br>CACTTACCAGAGCCAGCAAAATTACTTACCGCACCGCAATTCTCTCCTCTATCAAGGCCACAAAGAGATCG<br>ACGTTTGGTCGCGCTTTGTTTACGGCACCAACGTCCTCGTGCCTTTCAATTACGCGGCTCTTAGTCAG<br>GATCAGTCCAACGGTAACATCTCGTCAACATTAAAAATTGACGGCAGAGTTGCTTGAAGGTTGGCGCCTT<br>CATCTCTGGCGGTTACCACTCTACGTCCGGTGCCTGCTTTCATCAATTTTGGGACCCGGAATAACGGAA<br>TTTTCCGTTGGTGAACCGCGCATTAAGTACCAGCTTGTTCAGTCATGCTCCGTTAGCGTTTGA                                                                                                                                                                                                                                                                                                                                                                                                                                                                                                         |
|           | ATGGCAGATCATCAGAGACAAAGGATCCACCTATGGAGGTAGGAGCACCACCACCAACCATCCCAT<br>GGTACCTCCAGGTTTCTCAAGATCAGAAAAGGGTAACCCCTTACACCGTCCACCACAACCTACATGCTAGGC<br>CAGCAATATACCTTACCAAAAAAAGGAACTGCTTTTGCAAGTGCATATGTTGACTCTATGCTGGTT<br>TTCCTCCTGCTCATTATCTTGGCAGCAACTGTTGGAATCCTTTACCTAGTTTTCAAAACAAAACCTTCCCAA<br>TTACTCAGTTGAAACACTGAGGATAAGTGATCTTAGGCTCAACTTGAATTGAGTCTGTATGCAAAAGTTG<br>ATGTGAAGATCACAGCAAAATAACCAAAATAAAAGATTGGTATTTACTATGAGGAAGGTGGGAAATTGAGT<br>GTGTGTACAGAAAGCAAGACTTTGTGAAGGGTCAATACCAAGTTCTACAGGTCATCAGAACAAAC<br>AGTGCTGAATGTGTCTTGTGACTGGTCAAGTGCAATCTGGAAGCACCTTAATGACGGCATCGACGCAAC<br>AGCAACAGGACGCATTCCATTGGATCTCAAAGTGCATGACCAGTTGCCATCAACTTGGGAGGTTCAAG<br>CTGAGGAAGGTGAGAGTCTTGGGTGAATGCTGTGTTGGTTGGATAGCTTATCATCTAATAATCTCATAAC<br>CATCAAGGCTAGCAACTGCAATTTCAATGAACTTTAA                                                                                                                                                                                                                                                                                                                                                                                    |
| CrLEA2-26 | ATGCGCAGCAATGACCACATACCCGTTTCATCATGTGCGGGACCGAACCCGAAACCCATGAAACGACACCG<br>TACCGCTCGGTACTACGTTTCATCGGGTCCATGAAAGCCTCACAACCCGCTGTCCAAGATAATCTGCGCCA<br>CTTTCTTGGGCTTACTTGCCATTGTGGGCTCATCACCTTCATCTCTGGCTCAGCTCCGGCCCCACCGG<br>CCCAGGTTTCATATCCATGAATTCAACATGCCGGGCTGACCCAACAATCCGGGTTGAAATGCCCGGAT                                                                                                                                                                                                                                                                                                                                                                                                                                                                                                                                                                                                                                                                                                                                                                                                                                                                                |
|           | ATGATAGAAAAATATGGGCACCGCAAAAAGAGTAACATGTGCCTGGTGGTAACATGTATTGCAGTGATAGC<br>AATCTGCGGTAGCAACGATCTTAGTATCAACGATGTTAAACCAAGGCAACCTATAACCAAGTGGAAG<br>GCATAAGGCTTGATGACATGAATATGAACATGAATATGTTTAAAAATGAGGATGGATATTAACGTGACATTG<br>AAAGTGATATGTGCGTGGAGAACACAAATAAGTTGGATTGTGTACAATGAATGATTCCTTCAAAGGTTCT<br>CTATGGAGGGGAATTAATTGGGGAAGCCCCAATACCCAATGGAGAGATATTATCTGAGGAACTAAAGGAA<br>TGAACCTGACACTAACCATATGGCTGATCGCATGTTCTCCAATTCTCAAGCTTTCAAAGATGTTACAACG<br>GGTTCATTGCCCTCAACACTATTGTTAACTTTCTGGCCAAGTCATCATCTTGGGCTCATCAATTTTCA<br>TGTGGGTTCCACCTTATCTGTGATTTCAACCTCAATGTTTCCAATAGAACCATTGACCACAAAGAGTGTC<br>ACCATGACACAAAGATTGA                                                                                                                                                                                                                                                                                                                                                                                                                                                                                                                                                 |

|           |                                                                                                                                                                                                                                                                                                                                                                                                                                                                                                                                                                                                                                                                                                                                                                                                                                                                                                                                                                                                                                                      |
|-----------|------------------------------------------------------------------------------------------------------------------------------------------------------------------------------------------------------------------------------------------------------------------------------------------------------------------------------------------------------------------------------------------------------------------------------------------------------------------------------------------------------------------------------------------------------------------------------------------------------------------------------------------------------------------------------------------------------------------------------------------------------------------------------------------------------------------------------------------------------------------------------------------------------------------------------------------------------------------------------------------------------------------------------------------------------|
| CrLEA2-27 | AACCTTCAATGTAACGTGCCCGAAACTCCAACCAGAACATCGGGGTTTACTACGAGTCCATGGATGGAGCGG<br>TTTTATTACGGGACCAGAAAATCGGGTCGACATCGTTACTTAATCCGTTTTATCAAGAGCCCAAGAACACG<br>ACGGAGGTGGACGGTGATCTCAGTGGTGCCACGTTGACCGTTAGTAGTCAACATTTGGGCAGAAATCCAAAG<br>CGATAGGGGTGATGGTAGCGTGGTGTCCGCTTGGAAAGTGACGCTGTGTATCAGATTCAAGATATCAACGT<br>GGGACAGCAAGCGCCACACGATGCACGCTAACTGTGATGTGGCGTGGGACCCGATGGTTCCCTCTGTGCC<br>AATTACAAAGACAAGAGGTGCCCGTTTATTTCTCTTGA                                                                                                                                                                                                                                                                                                                                                                                                                                                                                                                                                                                                                       |
|           | ATGAAACCCCAATCACAACATAACAATGCTCGCCAAGACCGATTCCGAGGTTAGTAGCCTCAGTCAGTCGTC<br>CCCCGCGAGGTCTCCCCGACGGGCGCTACTATGTGCAAAGCCCATCACGTGACTCCTCCAACGACGGCG<br>AGAAGACAACCAATTTCATTCCAGTCCAGCCCGCTGCAAAGCCCATTGGGCTCCCCCTCCCACTCCCACTCC<br>AATTCATCTTTAGGCCCCGATTCTCGCGAATCTGCCTCCACCCGCTTCTCGGGCTCCCGAAAGACCAACGA<br>GTCCAACCGCAAGGGCCCATGGAGGCCCTGGAAGGATCAGTTCACGCCATCGAAGAGGAAGGCCCTCTCTCG<br>ATGCCCATGACGCTGCACAACATGGCTTCCTCGTCTGCTATTTTCTCGCATTTGTGTGGGCTTTGTA<br>GTGCTCTTCTCTGTTTTCTCCCTCATTCTGTGGGCGCAAGCCGCCCCCAGAAACCCGCCATTACGCTTAA<br>GAGTATTACCTTTGATCAATTTGTGATTCAAGCGGGTGCGGATGTGTGAGAGTGCCACAGCTTGGTAT<br>CCATGAATTCCTCAGTGAACCTAACCTTCGTAACACGGCTACATTTTTCGGAGTCCATGTGACATCAACT<br>CCTCTAAATCTCAATTATTTATCAGCTTACTGTGGCCACCGGAAGTATGCCAAAGTTTATCAATTAGGAA<br>AAGCCAGAGATCTGTTAGGGTGATGGTGAAAGGGAGTCATATTCGCTGTACGGAGGGGGAGCCAACCTGA<br>ACAGCGTGATGGTGCGCCAGTTGAAGCGGTACCATTTGAAATTGAGCGTGATGGTAAGGTCAAGAGCTTAT<br>GTTTTGGGGAAATTGGTGAAGCCCAAGTTCTACAAGAAGATAGATTGCTCCGTCTGTTATGGATCCGAAGAA<br>GATGGGCAACCCATTTTCGCTGATGACCAAGTGCACTTATCAGTAA |
|           | ATGACCAATAGAGGGGGAGAGAGAGAGAGAATGACCACAACAGGTAACCAACCACAACCACACCCACATCC<br>ACAGCCACAGCCACAGCCACAGCCACAGCCACAGCCAAACCGGTGAGCGAAGACAAAGGCCAGCACCAGCAT<br>CAGCACCAGAAACACCGGCACAATATTCGGCTTCTTCAAATGGAATGGTTACAGGCAGTACAACCCACG<br>ACGCGTCTCGTTTCGTCTCGTCTCGGCGTCGTTTAAAGGGTGTGTGTGCTGTCTGCTGTTCTCGTT<br>GCTGGCACTGTTGGTGTTAGCGGTGGTGTGTTAATAATCCTAGCGGTGAAGCCGAAGAAGCCACAGTTCG<br>ATCTTCAGCAAGTTGGGGTGACGTACATGGGCATAACACCCAATCCTCCCTCCACGCGCTCCCTCTCCCTC<br>ACCATACGCTCTCTCTTACCGCCGTTAACCCAAACAAGTCCGGCATCAAGTACGGCCAGTCTAGCTTCAC<br>CGTCATGTACCGCGGCATCCCCCTCGGCAAGCCCTCCGTTCCCGGCTTCTACCAAGACTCTCACAGCGCTC<br>GACAAGTCGTCGCCACCATCGCCGTCGATCGGGTCAATTTGCTTCAGGCCGATGCCGCGGATTTGATCCGA<br>GACGCTTCCCTCAATGACCGCGTCGACCTTCGTGTCTCGCGCATGTTGGTGCCAAGATCCGTGTGATGAA<br>CTTCGATTCTCCTGGTGTTCAGGTCTCCGTGGATTGTGCTATAGTGATCAGTCCAAGAAAGCAATCTCTGA<br>CTTACAAGCAGTGTGGATTTCGATGGATTGAGTGTTAA                                                                                                                                                               |
|           | ATGGCTCATCCTCCACCACAATCACAGCCTCAAGCAGGGAAGCCAAACCGCTCAATCCTGCTCCGTTACAT<br>TGCAATGATAATTTTCTTAAATATCCTTGTGGGTATAGCTGTGCTCATAATTTGGCTGGTTTTGAAGC<br>CGAAACGGTTGGAGTACAGTGTGGAAGATGCTGCAATCCACAATTCACCTAACCGGATGCAATCACTTG<br>TATGCGAATTTTGATTTTACCATAAGAGCATAACAATCCCAATTCAAGAGTTTCTCTGTACTTGACTCTGT<br>GGAGGTGGCAGTGCCTTATGAGGATCAAACATTAGCCACCAATGCGGTAAAGCCATTCTTCCAGTCACATA<br>AAAAATGTGACTAGGCTGCATGTGGGACTCACTGCTCAAACCGTGGCTTTGTATGATTCTGTGCTTAAGGAC<br>CTTAGACTTGAGAGGTCTCAGGGGATATTGAGTTAGATGTGTTGTTGAGGGCAAGGATACGCTTCAAGGT<br>TGCGCTCTGGAAGTCAAAGCATCGAATTATGACCATTTTTTGTCTCCTGTGTTCCCTCACATTTTCCAAAG<br>CCAAGAGTTTCCAAAGGACACCTTGTGAAGTACAACCTCTGA                                                                                                                                                                                                                                                                                                                                                                                        |
|           | ATGCCATCCCTCTCACCTCTCCTCTTGA AAAA ACTTGGCATAACCAAAACAACCAAGGAATCAACATTTCCG<br>GGAATTAGAAGCACCAAATTCCTTAGTAACACTCTGGTAATACTTGGGCAACCTCACCTTCAAAGGACCA<br>AACCAATTATATGTTGTGCTCGAGTGTGTTTAAATATTCAGCCTTGACTATTTCTTCTTGTGAAATGCA<br>ACATTGATTTTGTACCTTGCTATGAAACCACGAAACCCAAACATTTGACATTCCCAACGCAAGCCTCAATGT<br>AGTGATTTTGTACTCACCACAGTACCTCAATGGTGAATTCACCTCTCTTGCAAATTTTCTAATCCTAACA<br>GAAGATTTACGTTGAGATTTGAGTCTTAAAGTCGAGCTTTTCTCTCGGACAGGCTCATATCAACACAG<br>TCAATCAAGCCTTTTACTCAGAGGCCAAAGGAAACAAGGTTGCAACCGGTGATCTCATATCCAGCTTGGT<br>GTTTCTGCTCAAGATGTTGGGGTGAAGCTTCAAAGGCAGGTGCAGAACAACAGGGTCAATTACAATGCAA<br>GGGTACTTTTAAAGGTGAGGGTCAACATGGGCCTAATCCATTTATCTTACTGGCTCCATAGCATATGCCAG<br>ATAGAAATGACTAGTCCACCAACAGGAATCTTGTAGCTAGACAATGCATAACAACCCGATGA                                                                                                                                                                                                                                                                                         |
|           | ATGTCGACATCTGATAAAACAGAAATAGTGGAAAGGGTTCTAAGGATGAAAAGCAAGGAGGGTGAGAA<br>AGAGGAAGGCAAGGGTGGATTTATTGAGAAGGTGAAGGATTTCAATCATGACATTTGGTGAGAAGATCGAGG<br>GAGCTATCGGGTTTGGGAAGCCAAACCGCTGATGTTACTGCGATACACATTCATCAATCAATCTTACAAG<br>GCAGATCTTGTGTTGATGTGCTCATAAAAAACCCAAATCCAGTGCCAATCCCTCTGATTGACATAGATTA<br>CTTGATTGAGAGTGATGGAAGGAACTGGTTTCAGGATTGATACTGATGCTGGTACTATCCATCGGCACG<br>GAGAGGAGACTGTCAATATTCCTGTTACCTTGATTATGATGACATCAAGCAAACATATAATGATATTCAA<br>CCCCGAAGCATCATTCCTTATAGGGTGAAGGTTGATCTCATTTTTTGATGTTCTATCTTGGGAAGGTTTAC<br>ACTACCTTTGGAGAAAACCTGGAGAAATTCCCATACCATAACAAGCCTGATATTGATCTGGAGAAGATTCAAT<br>TTGAAAGGTTCTCTTTTGGAGAGACAATTGCAACTCTTCAATTTGAAATTGGAAAACAAGAATGATTTTGAC<br>CTGGGCTCAATGCGCTTGATTATGAGGTCTGGTTTGGTGATGTTAGCATTGGAGGTGCAGAACTCACCAA<br>ATCTGCAAAAATTGAAAAAGTGGAAATTAGTTACATTGATATTCTATTACCTTACAGGCCAAAGGATTTTG<br>GTTCTGCTGTCTGGGACATGATTAGAGGAAAGGGAACCGGTTACACCATGAAAGGAAATATTGATGTTGAC<br>ACTCCCTTTGGGCTATGAAATTGCCATCAGCAGAGAAGGTGGTACTACCCGCTTAAAGAAAAAGAAAGGA<br>AGATCGTGATTTATGATGATGATGATGATGATGAGGATTAA   |
|           | ATGGCCGACCGAGTTCACCTCAAGACTCGCTCCTGTTTCCGGAGAGTCGCAAACGACGTCGTCTCAGCA<br>GCCTGCCATCGTTTCAGAATCCGGGCGCCGAACCACTGTGCGAGAAGCCTGTTCTCCGCGGGGAACCTACG<br>TCATCAGGATTTCCCAAGGACCAAGTCTACCGCGTCCCTCCGCGGAGAACGCGCGCTCAAGACCAATT<br>ATTCGCGGAAACACCGTCGAGCCGATGCTGCTGCTGCTTCTGCTGGCTCATCGGATTTTATCTTCTTCT<br>CATCGTGCTCCTCGAATCGCCGCGGAGTTCTCTACCTAGTTTTTCCGTCCGGAGGCGCCGAAATACACCA<br>TCGACGGCATCGCTATCAGAGGAATGAATGTCACGTCGCCATCTTCTGCGCGGCGAGTTTCGCGCGGAGTTC<br>GACGTACCGTCAAGGCCGACAAACCCCAACGAAAATTGGAATTGCTTACGAGATGATAGCTACGCGCGCA<br>AATCTTCTATAACGACGTGAGGCTGTGTAACGGCGCTCTTCCGGCGTTTTTACCAGCCTTCAAATAACGTAA<br>CGGTGTTTAAAGACGGTGTTAAGGGGAAACGGAATCAAGCTGAGGAGCGGAGACCGAAGCGCGTTGCTGGAG<br>GCCAGACCAAACGGAAGTGCCGTTGACCGTTAGTCTTAGGGCGCGCGTGAAAAATAAGTGGGGTCCGT<br>TCAGACGTGGAAGATTACCGTTAAGGTGGACTGTGATGTAACGGTGAATGAGCTAACGGCGCAGGCCAAGA                                                                                                                                                                                                         |
|           |                                                                                                                                                                                                                                                                                                                                                                                                                                                                                                                                                                                                                                                                                                                                                                                                                                                                                                                                                                                                                                                      |
|           |                                                                                                                                                                                                                                                                                                                                                                                                                                                                                                                                                                                                                                                                                                                                                                                                                                                                                                                                                                                                                                                      |
|           |                                                                                                                                                                                                                                                                                                                                                                                                                                                                                                                                                                                                                                                                                                                                                                                                                                                                                                                                                                                                                                                      |
| CrLEA2-28 |                                                                                                                                                                                                                                                                                                                                                                                                                                                                                                                                                                                                                                                                                                                                                                                                                                                                                                                                                                                                                                                      |
| CrLEA2-29 |                                                                                                                                                                                                                                                                                                                                                                                                                                                                                                                                                                                                                                                                                                                                                                                                                                                                                                                                                                                                                                                      |
| CrLEA2-30 |                                                                                                                                                                                                                                                                                                                                                                                                                                                                                                                                                                                                                                                                                                                                                                                                                                                                                                                                                                                                                                                      |
| CrLEA2-31 |                                                                                                                                                                                                                                                                                                                                                                                                                                                                                                                                                                                                                                                                                                                                                                                                                                                                                                                                                                                                                                                      |
| CrLEA2-32 |                                                                                                                                                                                                                                                                                                                                                                                                                                                                                                                                                                                                                                                                                                                                                                                                                                                                                                                                                                                                                                                      |

|           |                                                                                                                                                                                                                                                                                                                                                                                                                                                                                                                                                                                                                                                                                                                                                                                                                                                                                                                                                                                                                                                                                                                                                                                                                                                                                                                                                                                                                                                                                                                                                                                                                                                                                                                                                                                                                                                                                                                                                                                                                                                                                                                                                                                                                                                                                                                                                                                   |
|-----------|-----------------------------------------------------------------------------------------------------------------------------------------------------------------------------------------------------------------------------------------------------------------------------------------------------------------------------------------------------------------------------------------------------------------------------------------------------------------------------------------------------------------------------------------------------------------------------------------------------------------------------------------------------------------------------------------------------------------------------------------------------------------------------------------------------------------------------------------------------------------------------------------------------------------------------------------------------------------------------------------------------------------------------------------------------------------------------------------------------------------------------------------------------------------------------------------------------------------------------------------------------------------------------------------------------------------------------------------------------------------------------------------------------------------------------------------------------------------------------------------------------------------------------------------------------------------------------------------------------------------------------------------------------------------------------------------------------------------------------------------------------------------------------------------------------------------------------------------------------------------------------------------------------------------------------------------------------------------------------------------------------------------------------------------------------------------------------------------------------------------------------------------------------------------------------------------------------------------------------------------------------------------------------------------------------------------------------------------------------------------------------------|
|           | TTGTTTCGAAGCATTGTAATTATAACGTGGATCTTTGGTGA                                                                                                                                                                                                                                                                                                                                                                                                                                                                                                                                                                                                                                                                                                                                                                                                                                                                                                                                                                                                                                                                                                                                                                                                                                                                                                                                                                                                                                                                                                                                                                                                                                                                                                                                                                                                                                                                                                                                                                                                                                                                                                                                                                                                                                                                                                                                         |
| CrLEA2-33 | <p>ATGGCAGATCCTCAGAGAATTCACCTGTCCATGATGTGGAGGCCACCAACCACCTACAGCACCATTGGT<br/> TCCTAGAAGCGTGTCTAAATCTGATGCAGGTGATCCAGAGAATGTGGTGACCACCTCCCTCCTCTACTT<br/> CTCTTCCTTCACAACCTGTGATGCATTCAAAGCCACCAAGAAAAGAAGTGTGTGCTGCAGGTTTCTG<br/> TGTTGGTTTATAAGCATATTGCTGATTCTGATTGTGGCTATTGGCATTACCATTTGGGATACCTGTTCTTGT<br/> GTTTAGACCAAAGCTTCCAAAATACTCAGTTGATGAACCTTAGAGTCACACAGTTTGATCTTGCTGACAACA<br/> ATAGCCTATCAGTTACTTTCAACTTGACAATAATTGCTAGAAACCCAAACAAGAAGATTGGAATAGACTAT<br/> AGAGGTGGAAGTCACATAAGTGCTTGGTATATGGACACAAAACCTATGTGAAGGGTCTTTGCCAAAATTCTA<br/> TCAGGGTCACCGCAACATCACAGTGCTTAGTATCCCTCTTATAGGCCATACACAGGATGCTAGTGGCTTGC<br/> AAAGTACCATTACAGCAGCTGCAACAACCGGTAATGTTCCCTCAATTTGAAGGTCAAACAGCCTGTG<br/> AGGATTAAGCTTGGCAAGTTGAAGCTGTTCAAATCAAGTTCAGGGTCAGGTGCAGGCTTGTGGTGGACAA<br/> CCTTAATGCTAATAATTCTATTAGAATTCGGAGCAGTAGTTGTAAATTCAGGTTTAGGCTGTGA</p>                                                                                                                                                                                                                                                                                                                                                                                                                                                                                                                                                                                                                                                                                                                                                                                                                                                                                                                                                                                                                                                                                                                                                                                                                                                                                                                                                                                                                                                                                                                   |
| CrLEA2-34 | <p>ATGAATTGTAGACCTCGTTGCAGCTTCTGTGTCATCTGTTGCATCTACACCACAATCTACGTCCTTATGTT<br/> CATCTTAATGCTTCTTCTCATCTCTTCTGGATAGTAATCTCACCTCAAGTGTCAAATTCATGTAACGTG<br/> ACGCCACCTTCACACAATTCAACCTTCACAACCAACACCTTACATTACAACCTTGAAGGTCAACATCACA<br/> GTCAGAAACCCCAACAACAGCTGAAAGTATATTATAGAGCTATCACAGCAATAGCTTGGTACAAAGATAA<br/> TGACATTGGTTTGGTGAGTTGACACCTTTGACCAAGGCCACAAGAACAACCACTTCCCTCAAGCAGGTG<br/> TTATAGGACAAAGTGTGATTAAGCTCCAAGCTAAACAACCTTGATGAGTATAAGGAAGAAACAAGTGTGGA<br/> ATCTACAATGATTTGGCTGTGGATTGGATCTTACAATCAGAGCTAAGTTTGAAGGTTCAGAAGCAGTCA<br/> TTATAATCCACCAATTGTGCAGTGTCGCTGCTTGAAGTTCCCTTTGATTTCCAATGCTAAAAACAACCTC<br/> CTTTCAGTGTCAAAAATGCAGCTTCTGTTTAAAGTTCTTAAAGATCGTGATGCTGAGCAAGGCTGA<br/> ATGTGTTGCAAAACCCCGCAGCACCTTCTGCTGCATCTACTGCACCTTCTACACTCTCATGATCATCTTTT<br/> CCTTCTGTGCATCATCTTCTGGATAATCATCTCACCTCAATGTCAAGTTCACATAACTGAGGCTCCC<br/> TCACACAATTCACCTCACAAACAACAACCTTATATTACAACCTGAAGGTCAACATCAGATTAGAAAC<br/> CCCAACAACAACATCATAGTATACTATAGGAGAATCAAAGCAATAGCTTGGTATACAGCAATGATCTTGG<br/> TTGGGTAAGTTTAAACACCTTTGATCAAGGTCACAAAAATACCACCTTCCCTCAAGTAGAGTTTAAAGGGC<br/> AAAGTGTGATTAAGCTCAAAGCTCAACAACCTTGGTGAGTACAAAGAAGAAACAAGTGTGGGATTTACAAT<br/> GATTTGGCTGTGGATTGGACCTTAGAATCAGAGCTAAGTATGGAAGGTTCAAAGTAGTCGTTTCAATCC<br/> ACCAATTGTGCAGTGTCGCTGTTTGAAGTTCCTCTGATTTCTAATGGTAAACACCACTCCCTTAGTG<br/> TTACCAAATGTAAAAGTGGTTCTTCTTTGTGGACCTAATCTCACCTCAAGTGTCAAGTTCATGTAACCT<br/> GATGCCTCCCTCACACAATCAACCTCACAAACAACAACCTTATATTACAACCTGAAAGTCAACATCAC<br/> AGTTAGAAACCCCAACAATAACATCATAGTGACTACAGGGGTATCACAGCAATAGCTTGGTACAAAGATA<br/> ATGACTTTGGTTGGGTGAGTTTAAACACCTTTGACCAAGGCCACAAAATACAACCTTCCCTCAAGCAGTG<br/> TTTAAAGGCCAAAGTGTGATTAAGCTTAAACAACAACCTTGGTGAGTACAAAGAAGAGACAAGTGTGG<br/> GATTTACAATGATTTGGCTGTGGATTGGACCTTAGAATAAGATCTAAGTATGGAAGATCGGGCTTTAGCT<br/> TCTGTGCTTTTTCTGCATCTACAACACATTCTACACCTTATATTCCCTCTTCAACACTTTCCCTCATCATC<br/> TTTTGGATAATAATCTCACCTCAAGTGTCAAGTTCATGTAACCTGATGCTCCCTCCCTCACACAATCAACCT<br/> CACAAATAACAACACCTTATATTACAACCTGAAGGTCAACATCACAGTTAGAAACCCCAACAAGAAGAGCA<br/> TAGTGACTACAGTTGTATCACAGCAATAGCTTGGTACAAAGATAATGACTTTGGTCTTGTGAGTTTAAACA<br/> CCCTTTGACCAAGGCCACAAGAATACAACCTTCCCTCAAGCAGTGTTTAAAGGGCAAAGTGTGTTTAAAGCT<br/> CAAAGCTAAACAACCTTGGTGAGTACACAGAAGAAACAAGTGTAGGATTTACAATGATTTGGCTGTGGATT<br/> TGGATCTTTAGAATCAGGTTTAAAGGAAGGAAGGTTCAAAGTAGTCGTTTCAATCCACCAATTGTGCAGTGC<br/> GTCGCTTGA</p> |
| CrLEA2-35 | <p>ATGACTGGGAAGGACGAGTTTCTCTCGTACTCGCCCCCTCCCTCCAATCCAATCCATATTCTAATAACCC<br/> TAATCCTAACCCTAACCCTAACCCTTACCATTACCCCCAAAACGTGCTGCTTCTCCTTCCCTATCGGT<br/> CACCTTCCCTCCGTCGCGCTCGTCTGCTGCATCCTCTACTCCGCTGCGCTCTTCATCTTCTTCTCCGTC<br/> GCCGCCGTCTTCATCTTCTACCCATCCGACCCGGAGATCCGCTCGTCCGATCCGACTCAACCACATTGG<br/> AATCCGAACCTCTCCGAGGCCATCTCGACCTCTCTTCTCCATCACCGTCAAGGTTCCGAACAGAGACT<br/> TCCCTCCCTATCCTACGATTCCCTCTCCGTCTCCGTGCTTACCCTGGCCGCGCAGTATGGTTTCGTCAAC<br/> TCCTCCGCGCGCCGCGCATTAGGGCGCGTAGCTCCTCCTACGTTGACGCCAGCTCACCTCAATGGATT<br/> CGAGGTTATCTACGATGCTTCTACTTGTGCAAGACATCGCCAGAGGTGTTATCCCGTTTCGATACCGATA<br/> CTCGAGTTGAAGGGAATTTGGGGCTTTTATCTTCAATATTCCTTGAAGGCTACTGTGTCATGTGAAGTG<br/> TATGTCAATATAAACCAGCAGACAAATGTACGTCAAAACCTGCTACCCTGAGTCACTGGGTGATCCGCTGGA<br/> TCAGAGCACAATATTGGAGTTGCGAGATCATGA</p>                                                                                                                                                                                                                                                                                                                                                                                                                                                                                                                                                                                                                                                                                                                                                                                                                                                                                                                                                                                                                                                                                                                                                                                                                                                                                                                                                                                                                                                                                                                                                         |
| CrLEA2-36 | <p>ATGCACGCCAAGACCGATTCTGATGTCACGAGTTGTGATCCATCATCGCCAAGATCTCCAAAACGCGCCGT<br/> TTACTATGTGCAGAGTCCCTCGAGAGAGTCTCATGATGGTGATAAATCTTCTCTATGCATGCCACTCCAG<br/> CATGTAATAGCCCCATGGAGTCACTTTCACACCACTCGTATGGTCACCATTTCAAGGCTTCCCTTCCAGC<br/> AGGGTCTCCGGTTCTTCAACTCTTCTTGGGGAAGGAAAGGGGACCGTAACCGAATGATAAAGAGTGGCC<br/> TGAATGCAAGGTGATAGAGGAAGAGGGTGGTAATGGTGATTTTACCCTGATAATAAAGGCTTCTCAAGGA<br/> GGACTCAGATCTTCAATTGCTATGATTGGTTTTGTCTTGATTTTCGGTGTGTTCTGTTTGATCATTTGGGGT<br/> GCTAGCAGGCCTTACAAACCTCAACTCAGTGTCAAGAGTTTGACAGTACACAACCTTCTACTTTGGAGAAGG<br/> GACAGACATGACAGGAGTTCCAACCTAAGATGCTGACAGTGAATTGCTCAATGAGAATGATGGTGATAACC<br/> CTGCAACCTTTTTTGGCATTCTATGTCAACTCCAAGGCAGTGAGTCTTATGTATTCGAGATCACAGTTGCA<br/> ACTGGTGAGCTGAAGAATCATTATCAGCAGAGAAAGAGTGCAGGACAGTGTGTTGTAACCTGCAAGGAAG<br/> CAAGGTTCCATTATATGGTGCTGGTGCAAGCTTAGCTGGTTTGGTGGACAAAGGAAAAATACCAATGACGC<br/> TTGCTTTTGAAGTAAAGTACAAAGGGAATGTTGTTGGGAAGTTGGTGAGGTGCAAAACATGACAGCATGTT<br/> TCTTGCTCAGTGGCTATTGATTCCCAACAACAACCCATCAAACCTCAAAAACAATGCATGTACATACGA<br/> TTGA</p>                                                                                                                                                                                                                                                                                                                                                                                                                                                                                                                                                                                                                                                                                                                                                                                                                                                                                                                                                                                                                                                                                                                                                                                                                                                                                                                                    |
| CrLEA2-37 | <p>ATGAAAACAGAATACAATAGGATCCAAAATTTTCTTGTGTACACCTGCATTGGTTTTTCCCAAAAAACAAGA<br/> TTTTAAAGGTAATCCCAATTGTTCTTATTACCCGGAACCAGAACTATGGCTAAAAGAAACCTCAAAATCT<br/> GCATTTCTGTGTCTGCAGTTTCTTTATAATTGTTCATCACTGTGTTTCTGACCTTAATTTTGACCATATTT<br/> AAACCCAAAAACCCAGATATATTTCTCCACCCTGTGACCTCAAAAACCTTTCAGTTATTGTCATCCAATTC<br/> AACTAATGCACCACTAGGCATGGTGGTCACAATAGTGAATCCAACTATGGAAGCTTCAGGTACATAAATTT<br/> CCACTGGTTATCTTGAATATCGTAATACTACAGTAGCCAAAGTTCCCTTGGAGACAAAATCTGTTCTGCG<br/> CGTACCAGGACCAATGTGAGCACTTCTGCAGGTATTATGACAGAAAAATTTGATTGATGATCCAAAATTTTG<br/> GTCAGAAATTGAAGGTGGGACCTTCAATTTGACAGCAAAGGCCACATTGCCTGGGAAAGTGAATGATTTCA</p>                                                                                                                                                                                                                                                                                                                                                                                                                                                                                                                                                                                                                                                                                                                                                                                                                                                                                                                                                                                                                                                                                                                                                                                                                                                                                                                                                                                                                                                                                                                                                                                                                                                                                                                                         |
| CrLEA2-38 |                                                                                                                                                                                                                                                                                                                                                                                                                                                                                                                                                                                                                                                                                                                                                                                                                                                                                                                                                                                                                                                                                                                                                                                                                                                                                                                                                                                                                                                                                                                                                                                                                                                                                                                                                                                                                                                                                                                                                                                                                                                                                                                                                                                                                                                                                                                                                                                   |

|           |                                                                                                                                                                                                                                                                                                                                                                                                                                                                                                                                                                                                                                                                                                                                                                                                                                                                                                                                                                                                             |
|-----------|-------------------------------------------------------------------------------------------------------------------------------------------------------------------------------------------------------------------------------------------------------------------------------------------------------------------------------------------------------------------------------------------------------------------------------------------------------------------------------------------------------------------------------------------------------------------------------------------------------------------------------------------------------------------------------------------------------------------------------------------------------------------------------------------------------------------------------------------------------------------------------------------------------------------------------------------------------------------------------------------------------------|
| CrLEA2-39 | ATATTTTCAAGCTTAAGGCCACGGTTCATATTTTCATGTGATATCTCTATTAAACATAATTGCTATTGATTCT<br>GGTTCACCTGCGTGGCCAAACTCAAGTTATGA                                                                                                                                                                                                                                                                                                                                                                                                                                                                                                                                                                                                                                                                                                                                                                                                                                                                                               |
|           | ATGTCATAGCAAGGACTGCGCCACCACGAAGAGGCGCGGCAGCTTCTCGCCGCATAGTTGGTGCCAT<br>CGTAGCCTTCATAGTCTTAATCCTCCTCATAATCTTCTTAATCTGGATCATCCTCGACCCACAAAACCCC<br>GATTCATTATCCAAGACGCCACCTCTACACCTTCAACTTCTCATCCACCTCACCTCTGTAACTTCCCCC<br>ACACCCAAACATCCTCACCTCACAATGCAAGTCACGCTTGCCGCACACAACCCCAACCACCGCATCGGCAT<br>TTACTACCACAATCTCTATGCCTATGCCTCTTATCGTAACCAACAGATCTCCCTCGCCACTTCCATTCCCA<br>ACACCTATCAAGGCCACAAGGACTTCATATTTGGTCTCCGTTTCATCTACGGTAACGCCGTTCCGGTTTCG<br>CCGTTTCTGTTGAGTGCTCTGCAGCTCGACCAGAGTACCGGTACCGTTTGGTCAACGTCAGGTCAATGG<br>AAGAGTCAAGTGGAGGTTGGGACTTGGATCTCCGGGAGGTACCATATTTATGTCAACTGTCTGCGTATA<br>TTAGGTTCCGGGAGATCGGAGTAATGCCATCGGCGGGGTGACTCCGGCGGTGAAGTTTTCAGCTTTTGCAG<br>AGTTGTAGTGTGATGTTTAG                                                                                                                                                                                                                                                                                                |
| CrLEA2-40 | ATGTTGAGCAACATACTTACCTGGACGGGGCCAATGGGTGATCCAGAAGGCCATGGCCTAGGGAAGTAAC<br>CTCCATTGCACTTTTGGAGGGGTGCTTCTCTAAGGTCTGCTCAAATCTCCGTGCTGATCTTTGGTCTCAATG<br>TCTCTCATCTCTTCTGAATATCCCCAACTCATTACAGCTTCTTGATTCTCCAAGTGGCGATGGGCAAA<br>AAGGTAATAATGGAGTTGGAGCTCGCGCTTTTGGGAGCAGCCTCAGCGGTGACCAACGACGCACTTACTC<br>AGCGAAACCCAAGGACCCAACTTTTACCTCATATCAATCAATTTCACTTCCCTCAAGCTCAACCTCCCC<br>TCCTCGACGCAGAGCTCCTCCTCACCGTCCACGTACCAATCCCAACATCGCTCCGATTCACTACTCCTCC<br>ACCACCATGTCTATTTTTTACGAGGGTTCCTTCTCGGCTCGGCTCAGGTTCAAGCCGGCTCACAGCCTCC<br>GCGTTCTTGCCAGCTCCTCCGCTCCCGCTCGCCTCCATGCGCTGCAACTCGCTCACACGCACTCGCT<br>TTGTTACGACGTTGCGCGCCGCGAGATGGTCTTGACGCGCTGTTGATATTGCCGGCACCGCCAAGGTT<br>CTTTGGTGGGACCACAACCTCAAGGTCCACGTGGATAGCCGCGTACCCTCGATCCCGTCTTTCTTGACGT<br>CATTGATCAGGAAAGTACCTCGGAACCTGAAGTCTTACCAGCAGCGTAA                                                                                                                                                                                             |
|           | ATGGGAGGAAGAATGCACACTAAGTCCGACTCAGAGGTACCGAGCAACAGCATCGACCACTCATCTCGTC<br>GCCGCGCGTTCCTCCCGCCGCGCCACTCTATTACGTCCAAAGCCCTTCAAATCATGACGTTGAGAAGA<br>TGCTTTACGTTTCAAGCCCCCTCGGTTCCCTCACCACCATATCCATTACTACCTCTTCCCCCATTCAC<br>CATTCGCCGAATCTTCCACCTCTCGTTTCTCTGCTTCTCTCAAAAACCTCGCCCTTCTCTCTCTCTG<br>GAAGAACTCCACCTCACCCTCACCCTCACCACGCGCTGACGACGACGAGACGACGACGACGACGACG<br>ATTCTCCGCAACCTGCGCTTGACCTCTGCTTCTTCTGCTTTTCTGCTTTTCCCTTATCTCTCT<br>CTCATCTCTGGGCTACCAAGACCTACAAGCCTCAACTCGCTATCAAGAGCATAGTGTTCGAGAAGT<br>GAACGTACAATCGGGAACGATGGAAGTGGGGTGCCAACAGATATGTTATCGTTGAAGTCAACGGTCAGAA<br>TTTTGTACAGAAATCCTGGCACTTTCTTCGGTGTTACGTCACCTCCACAGCTCTTCAGTTACCTATTAC<br>CAGCTTGCACTAGCCTCGGGTCAGATGCAGAAGTCTATCAGTCAAGGAAGAGTCAGCGGAAGGTAGTGGT<br>GGTGGTGTAGGACACCAGATTCCGCTCTATGGTGGAGTGCTGCTGCTTCTTGGAATATATAAGAGCATA<br>TCGACAGTGTGCAATTGCCACTGAACCTGACATTTGCAGTGAGATCAAGGGCTTTTCATCTTGGAAGATTG<br>GTTAAGTCTAAATTCTATCGAAGAAATCAGATGTTCTGTCACTTTGATGCGCAACAAACCTTGGAAGCTCT<br>TAATTTGAAGGATTCGTGTGCTACAAGTGA |
| CrLEA2-41 | ATGTCATCTGATCCTTATGCCCATCAAAGATATGTCTCCCTGCAGAACCAAGGCTATGTATCAGGGCCTCC<br>TCCTTATGGGTATGGCCGTAAAGCTCCACGTTACCATCACCACAGTGGTTCTGGTTGTTTATGTGGATGCC<br>TAAAGTTCTTCTGTGTGCTGCTTCTATAGTTGCTGCGGTTGCTGATTTTGGCGCTTCTTATCTTCAATCTC<br>ATTTTGGTGATCATTATTATGGTTTTATATTATCTTCTTAAGCCTGACATACCTTCTTACAATATTCAAGG<br>AATTGATATCAACACTTTTGATTTAAAAATTGATAATAAGCTCTTTTCTAATATTTCATTTGTTGAAAG<br>CGGATAATCCAAATGAAGGATTTGGGTGAATATTATAGATAATGAAGTTAGGTTATTGTATTACGGGTCC<br>CAACTTTGCTCTGGGCGTTCCCTCCTTCTTGCAACCAGAGAGGAACGTAACACAGTTCAATGTAACATT<br>GAAGGGGAGAGTGAGTTTGGCCCTGAAATGCAACAGCACTTAATGCAAGAACAGGATAAAGGGACAATTC<br>ATTTGTTAATAGCAGTGAGGCTTCCCATAAAGGCTTGTTGGTTGATGACCTTATTCATCTGAGGAAGTTCGTG<br>GTTAATATAAATTGTTCAATGATTATTGATCACTTGAACAAAACAAAAGCCTAATATTTTGAGGAAAGA<br>CTTCATCTACGGAATCGAGTTTGA                                                                                                                                                                                                            |
|           | ATGGTTTCTAGAGGGCGCAAAATTTGCATCGGCGTGCTCTAATATTGGTTATCGCTATTGGCACTGTGAT<br>TGCGACATTGTCACTGACAATCTTTAAGATCAGAGATCCTGTGATCAGTATCCACCCAGTTGGTCTCGAAA<br>ACTTAAAGTTTTCTCTTAATTTTTTCGTGCAATGTGAGTCTAGGCATGATTCTCACTATGGGGAATCCAAAC<br>TATGCAAGCTTCGAATTCAAAATTGATCAGTCAATTTTATAGAAAGCTTGATAGCTGATGTTTCC<br>AATTACAGGAGAGGTAGTTCCAGCGCGTGGTACCATTAAATGTGACCACTTCCGCGGATTTGATGGTAAGAA<br>AGTTAATACCTTGATCCCAATTTTGGTCAGATATTTTAGTGGCCATTTGAATTTGACATCAACAGCTACA<br>CTGCTCGGGTAGCGCATGTCTTAACCTTATCAAATTGAAGGCCACGGCTTATAGCTCATGTACCATCTC<br>TTTTGAAATACGTACTAAGAAATTTCTTCTTCAATTGCATATCCAAAATCAAGCTTTGA                                                                                                                                                                                                                                                                                                                                                                                                            |
| CrLEA2-42 | ATGGCTACTAGAAGCGTCAAAATTTGCTTGTCTGTCTCTACTTTTCTTGATCATTGTTACCATTGTGAT<br>TGTGACATTGTTTCTGACTCTCTTTAAACCCAAGGATCCTAACATCACTGTCCACCTCTTGGCCTTGAAA<br>ACCTTCAATTTTCCCTTTTACCCTAATTGACACTAAATGTGTCTCTAGGTATGTTGATCACCATAGGGAAT<br>CCTAACTATGGAAGCTTCGAGTACAAAACCTCCACTGGTTATATCAAATTTTCATGACACTGTTGTAGCCCA<br>AGTTCCAATGGAGGAGAGTTAGTCCCAGCGCGTAGCACCATTAAATGTGAACACTACAGCAGATTTTATGG<br>TTGGAAGATGATAAATGATCTAATTTTTTGGACTGATGTTTAACTGGGACTTTGAATATGACATCAACA<br>TCTACACTTCCCTGGGGAAGCGCGTATGCTCAAGATTATCAAATTCAGGCCACGGCTTATAGCTCATGTGA<br>CATCTCTTTTAAATAAACCTTCAAGCATGTTGATACCAAATGCATATCCAAATCAAGCTTTGA                                                                                                                                                                                                                                                                                                                                                                                                    |
|           | ATGACAAAGGACTGCGGCCACCATGATGAGGAGCGGCAACAACTCCTCGCGGCATATTCCGCGCCATCCT<br>TGGTTTCATTATCCTCATACTCCTCGTAATCTTCTAATCTGGATCATCTCCGACCCACCAAACCCCGTT<br>TCATTCTTGAAGACGCCACCGTCTACGCCCTTCAACCTCTCCTCCACCGGCGACATACCTTCAACCCCGC<br>CCACACCCAACACTCTCACTCTCACAATGCAAGTTACTTACCCTCTCAATCCCAATTTCTCGCATCGG<br>CATTTATTACCAACCTCCACGTCTACGCTCCTACCGCGGCCAGCAAGTTTCCCTCGCCACCGGACTGC<br>CACCGACCTACCAGGGCCACCGTGACACCACCGTGTGGTGCCTGCTGATCGGAAACGCGGTGCGCGTT<br>TCCCCCTACGTGTTGGAGGTGCTGGAGCAGGACAAAACCTCAGGGGGAGTGTTGGTCAACGTCAGGTCAA<br>CGGTAGAGTAAAATGGAAGGTGGGACTTGGGTTTCTGGAAGGTACCATATCTGCAACTGCCCCGCGT<br>ATATTAGGCTCGCCGAGATCGGGATACCGGCATCGGAGTTGCGGCGCGCGGTTAAGTTTCAGCTTTTC<br>CAAAATTGCGTTGTTGATGTTTAG                                                                                                                                                                                                                                                                                                      |
| CrLEA2-43 | ATGACTGACAGAGTCTACCTTCTGCCAAGCCCGCCGCAACGGAACGGCGCGCGCTAATCCATCTTT<br>CCCGCGACAAAGGCTCAACTCTATGGCGCCACCCGCCCTACCTACCGTCCCCAACCTCACCACCGCGCC                                                                                                                                                                                                                                                                                                                                                                                                                                                                                                                                                                                                                                                                                                                                                                                                                                                                 |
|           | ATGACTGACAGAGTCTACCTTCTGCCAAGCCCGCCGCAACGGAACGGCGCGCGCTAATCCATCTTT<br>CCCGCGACAAAGGCTCAACTCTATGGCGCCACCCGCCCTACCTACCGTCCCCAACCTCACCACCGCGCC                                                                                                                                                                                                                                                                                                                                                                                                                                                                                                                                                                                                                                                                                                                                                                                                                                                                 |
| CrLEA2-44 | ATGACTGACAGAGTCTACCTTCTGCCAAGCCCGCCGCAACGGAACGGCGCGCGCTAATCCATCTTT<br>CCCGCGACAAAGGCTCAACTCTATGGCGCCACCCGCCCTACCTACCGTCCCCAACCTCACCACCGCGCC                                                                                                                                                                                                                                                                                                                                                                                                                                                                                                                                                                                                                                                                                                                                                                                                                                                                 |
| CrLEA2-45 | ATGACTGACAGAGTCTACCTTCTGCCAAGCCCGCCGCAACGGAACGGCGCGCGCTAATCCATCTTT<br>CCCGCGACAAAGGCTCAACTCTATGGCGCCACCCGCCCTACCTACCGTCCCCAACCTCACCACCGCGCC                                                                                                                                                                                                                                                                                                                                                                                                                                                                                                                                                                                                                                                                                                                                                                                                                                                                 |
| CrLEA2-46 | ATGACTGACAGAGTCTACCTTCTGCCAAGCCCGCCGCAACGGAACGGCGCGCGCTAATCCATCTTT<br>CCCGCGACAAAGGCTCAACTCTATGGCGCCACCCGCCCTACCTACCGTCCCCAACCTCACCACCGCGCC                                                                                                                                                                                                                                                                                                                                                                                                                                                                                                                                                                                                                                                                                                                                                                                                                                                                 |

|           |                                                                                                                                                                                                                                                                                                                                                                                                                                                                                                                                                                                                                                                                                                                                                                                                                                                            |
|-----------|------------------------------------------------------------------------------------------------------------------------------------------------------------------------------------------------------------------------------------------------------------------------------------------------------------------------------------------------------------------------------------------------------------------------------------------------------------------------------------------------------------------------------------------------------------------------------------------------------------------------------------------------------------------------------------------------------------------------------------------------------------------------------------------------------------------------------------------------------------|
| CrLEA2-47 | GTAGCCGACGCCGATGCTGCTGCACGTTCTGCTTCTGGCTCATCCTCATCCTCCTAATCCTCCTCTCTCTCCTCCTCGGCGTCGCCGACCGTCTTCTACCTCCTATACCGCCCCACCGTCTTCTTCCACCGTCACATCGCTGAACTGTCTGTAACCTGAACCTCACCAGTCTCCTCCTCCTCAGTCCAGATTCACGCTCAACGTCAGCGCCACCAACCTAACAAGAAATCCTCTTCGCCTACGACATCACCTCCATCTCCATTCTGTCCGGCGATGTGACGTCGGGACGCGACCATTCGGCGTTCAGACGCGAAAGAACAACGACGCTGCTAAAGGCTTCAATCTCAAGCAGTGGACAGGCACTGACGAGTGACGATGCGTCGCGGTTGAAGGCAAACATGAAGAGCAAGAGTGATTGCCATTGGAAGTGAATTTGGAGACAAAGGTGAAGGCAAAGATGGGAACTTGAAGACTCCAAAGGTA                                                                                                                                                                                                                                                                                                                                                        |
|           | GGAATCAGAGTGTTTTGCGACGGAATAAGAGTCACTCTTCCACCGGTAAGAAGCCTGCAACAGCGCTCCACAAAAATGTTAAGTGCACGTCAATGTTGATTCAAGATCTGGAAGTGGACCGTTTTGAATGCTGTCTGCAAAATCTGAATCAGATATTACTAGCTTAGCTCCATCTTACCTTCAAGATCTCCAAAGCGGCCGTGTACTATGTGCAAAAGTCTTCAAGAGATTCACATGATGGAGACAAGTCACTTCAATGCAGGCTACTCCAATATCAAAACAGTCCATAGGAGTCTCCTTCTCACCCTTCTTTTGGGCGTCATCTAGAAACTCTTCTGCTAGCAGGTTTTCAGGGATTTTTCAGGTCATCTTCTGGAAGGAAAGGTAGTAGGAAGAGGAATGATAAGGGGTGGCCTGAGTGTGATGTGATTCTAGAAGAAGGCTCTTATCATGAATTTTCAAGACAGGCTTTTACTAGGCGTTTCAAGCCTTGATTGCTGTGTTTACTTTTGTGGTGTCTTCAACCGTGTTTGCTTGATCATTTTGGGTTGCTAGCAGGCTTACAAACTGAGGTACTGTTAAGAGCTTCACAGTACATATCTATGTGTTGGAGGGTTTTAGACTTCACAGGTGTCCCAACAAAAATGCTGACAGTGAATGGCACTTTACGCATGAGCATCTACAACCCTGTACATTTTTTGGCATCCACGTGCATTCCACACCCATCAATCTTATCTTCTCAGACATCACCGTTGCAACTGGCAAGCTAAAGAAATCTATCAACCCAGAAAAAGTACCGTATTGTATCAGTGAATGTAGAAGGTAA |
| CrLEA2-48 | CAAGGTTCCCTGTATGGGGCAGGATCCACATAACAGTATCAACAACTGGTGTGAAGTCCATCACATTAACCTTTGAAATCCGTTCCCGTGGAAATGTAGTAGGTAAGCTGGTAAGGTCAAAGCATCATAAGGAAATCACTGTCCATTGGTCATCAACTCTTCTGGATCAAAACCTATCAAGTTCAAAGGAATGCATGCACATATGATGA                                                                                                                                                                                                                                                                                                                                                                                                                                                                                                                                                                                                                                          |
|           | ATGATGTGTGGATATACGTACCATCTTCGACGTTTCAATAACTGCAATAGCAAAAATACAGAGAGCGTCCAAGGAAAGCCATGAAAATCTCAAAAGCTGCTTACGACCTTCTCCTACGGAACCTCATCAGCATCAAAACGACATCGTTTTATTACGCCGTTGTGTACTGACGCTCACCTGCACGCTGGGTCTGGTCTCCTCCTCACCACCATCTACGCTTTCTGGCCGTGAGATCCTGATCTGAAGATCGTAGGGTTCAAGCTGAAGCGGGTCAAGCTGCA                                                                                                                                                                                                                                                                                                                                                                                                                                                                                                                                                                  |
| CrLEA2-49 | CCCCTTGGCTCCCGTAACCGTGGACATATCCATGCTCATCAGCTGAGAGTGACACAACTGATATGTACTCCTTGGAATTTGGAGCCGTTAACGTGATCGTTGCCTACAGGGGGTGAGGCTCGGGCACGTGACATCCAGCATGGGCACGTGAGAGCCAGGGGATCTTCTACGTGGATGCTGACGTGGAATTTTTCTGGAATCAGTGTGCTTCCGCAGATGGTATGGTGTCTGGAGGACGTTGTTAAGGGTATCGTACCCTTTGATACTGTTAGCCAGGTTAGGGCCAATGGGGCTTCTCTTCTTCACTTCCCTATGAAGTCAAGGCTATCGTGTGAGGTGTGGTGAGTATACAAAACAGACGATTGTTCCGCAACATTGTCCCGCGGGAGATGA                                                                                                                                                                                                                                                                                                                                                                                                                                                  |
|           | ATGTTGTGAGAGCAAGAGTTTCTACAAATGGCTCATGCAATTCAATATGCCTTTTAGGCCTCCTTGTCTGTGCTTATGGCTGTCTTACGACCCAAGAGCCCTCCTACTCCATTGTATGCATCTCCATAGAACAAAGCCTCGA                                                                                                                                                                                                                                                                                                                                                                                                                                                                                                                                                                                                                                                                                                             |
| CrLEA2-50 | ACTCGAATCAAAACGGCACCATCTTACCAACTTCAAAATGAAAACCCAAACAAGGAATCAAGCATTTTACCATGATGATATAATATTAAGTTTCTTATATGGGCAGATGGAGGATGAGGTGGGGGAGGATACCATAGGCTCATTTCCATCAAGAACTGGTAACACCCGAGATAAAATTTGGTACTGTCAACGCCAAACCTCGACCATTCAAACCTCTCTTGAACGCCATCTCAAAATGCAACCCGAGAGTTAACAGTTGCTTTGAAGACAAAATTTTCGATACAAGACATGGGGAATTAAGAGCAAGTCCCATGGTTTACACCTCAAAGGTATTCTACCAATTTGATCCCAATGGGAAGCTTTACGTAAACAAGAAAGTACCCACTTAGTCCCAATTTCCAAAAAATAGGAAGGTACAAAATAAAGC                                                                                                                                                                                                                                                                                                                                                                                                                |
|           | ACTGAATGAGGTGTTCCAAAGGGTTGAAAATCTGCTGTGCTGTCTCTGCCATTCTTCTAATTATATTGGTGTGGTACTTGTGATCTTGTCTTCTCACGGTTTTCAAGCCCCAAGACCCCGATATTATCCTACAGTCAGTTAAGCTTGAAGGATCGAAATTTGGCTTCCCAAGTCCAGAAATAAATGTGTCAATTAGGCCTAGTGGTCACGGTTGAAAAC                                                                                                                                                                                                                                                                                                                                                                                                                                                                                                                                                                                                                                |
| CrLEA2-51 | CCCATCATGGAAGCTTTACTTACCAAAACAGCACTGCTTATCTTAATTATCGAGGGAATATTGTGGCTGAGGCTCCTATACATGAGGACAAATTCCTGCTCGTGGAGATCATACATAAGCACATCTTTGGATATTTTTGCAGATACGAAAAATTTAAGGATTACCGAGTGATTTTTTAAGGGGCGTTATACCAATTTGATCCCAATGGGAACCTTACAGGCAAAGTCAAAATATTGCACCTCTTCAAGTTCAAGGCCACTAGTTACTCCACCTGTGATCTCTCTTACTCGTACATGACAAAAGCATCAATTCTACCTGCAACACAAAAATCAAAATTATAA                                                                                                                                                                                                                                                                                                                                                                                                                                                                                                      |
|           | ATGACCAAGCCACAGAGCCGCACCAACCTAGCTTCATGTTTCGTGCGCACAAATCTTTTGTATTTTCTTGTAAATCGTCTTCTGTCGTTACTTTTACGGTTTTCAAGCCCCAGGATCCCAAAATTCCTCGTCAGCGCGGTTCAAGCTCCCTTCCCTTTCCGTCACTAACGGCACCGTCAATTTACCTTTTCCCAATACGCTTCCGTTAGGAAC                                                                                                                                                                                                                                                                                                                                                                                                                                                                                                                                                                                                                                      |
| CrLEA2-52 | CCTAATCGAGGCACCTTCTCGCACTATGACAGCTCACTCCAGCTTCTCTACTATGGCAGACAGGTGCGGTTTATGTTTATTTCCCGCGGCAAGATCGACGCCGCGAGAAGTCAAGTACATGGCGGCCACGTTTACCGTTCAAGCATTTCCCGTTGGGCTTTGGGCCACCTTTTATTAACGGGCCATTAAATGTGGGGCCACGATGGAGAGTCGAGTCGAGAATATCGATGGCGGGACGAGTGAGAGTGTTGCACCTCTTCAGTCAACGTTGAGGCCAAAGCTCTATGCAGGGTCCCCATCGCCGTTCCCGATGGAACCGTCTTAGGTTTTCACTGCTAA                                                                                                                                                                                                                                                                                                                                                                                                                                                                                                        |
|           | ATGTCAGAAAACAGTGACCGAGTCCCGGTCAAGTCCAGAACGAGGAGGTATATATACACACACACATCAGAGAAATTAATCGCCATGTTTCCCAATACGCAAGAAGAAAGAAAAAGCAGCAAAATGTGTGTACGCTTTGGTTACCATTGCTACCTTATTGGGGTTGTATGTTTCTCATCTATCTTTTGGTGGTGCGAGATCCAAAAATGAATTGATATCAGCTAGGTTGGTGGACAATATTAATCATACCGTTATTTTCAAGCATCATCTCTTTTAATTTGAGCATGATTGGGCGTGTGAGCCTGTGGAACCCAACTTTGGTTCGCTTCTATTACGACAACACTACAGTGTGTGATGATGGGGATTTTAGTATTGGTCTTCCGAATTGGGAGGTGCGATTCTGGAGGCTAGAGAAAT                                                                                                                                                                                                                                                                                                                                                                                                                          |
| CrLEA2-53 | AAAGAATTCAATTCCATCGTAAATATGAGGTTCAAGTGAAGGAATTTGGTGAATCTTACCAATGATATCAGTTTATGCTGCTCAAACCTCAGAAAGCCACTCGGATTTAAGTGGTATAGGGTACGTGCTCAAGTTTATAAGAAGA                                                                                                                                                                                                                                                                                                                                                                                                                                                                                                                                                                                                                                                                                                          |
|           | GGAAGACCATACAAAATGGACTGCACTATGAATCTTGACTTAACCTCTTCTTCACTTCGCTACTCCAATGTAAATGGAATGGCGACAAAACATTCTTCGTCAAGACATCACACAATTCAACCAAGAGACAGCCATTTACAAACCATACACCAAGAACGAAGCAGCAAAATGGTTCGTGTCTTTTTTCTGCTTTGTATCTTATGTGAGTTCTATGGTCTTTGCAATCCGTTGCGCGTGTGCGCGTGCAGGAGTCCAGAGGTCAAACCTAAGATCAGTCACTTGAACAAATCAATATAGAGCTTCGCCAGCACTTCTTCAACGCCACTCTGATCACTTCTCAGAAATTAGGAACCCAAATTACGGTGCCTTCAGTTATGAGAAATAGCACGGTGACTGTGCTGATGCGGGTGAAAAATTGGTGATAAGGGAATCGGCAGTGACAGAGTTAGTTACAGAGAAACCAACAAATGAATGTTACCGTGAATGTGAGGTCTCTAAGCTACCCGTTACTGGGAATCTTTCGGGTGCCATTAATTCAGGAATGTTGAATCTCACCGGTTATGTCAAATTTAGTGGCACGGTTCATCTTCTCAAGATAATCAACAGCAGAAAGACCATACAAAATGCTTGCACATA                                                                                                                                                                                               |

|           |                                                                                                                                                                                                                                                                                                                                                                                                                                                                                                                                                                                                                                                                                                                                                                                                                                                                                                                                                                                                                                                                                                                                                                                                                                                                                                                                                                                                                                                                                                                                                                                                                                                                                                                                                                                                                                                                                                                                                                                                                                                                                                                                                                                                                                                                                                                                                                                                                                                                                                                                                                                                                                                                                                                                                                                                                                                                                                                                                                                                                                                                                                                                                                                                                                                                                                                                                                                                                                                                                                                                                                                                                                                                                                                                                                                                                                                                                                                                                                                                                                                                                                                                                                                                                                                                                                                                                                                                                                                                                                                                                                                                                                                                                                                                                                                                                                                                                                                                                                                                                                                                                                                                                                                                                                                                                                                                                                                                                                                                                                                                                                                                                                                                                                                  |
|-----------|------------------------------------------------------------------------------------------------------------------------------------------------------------------------------------------------------------------------------------------------------------------------------------------------------------------------------------------------------------------------------------------------------------------------------------------------------------------------------------------------------------------------------------------------------------------------------------------------------------------------------------------------------------------------------------------------------------------------------------------------------------------------------------------------------------------------------------------------------------------------------------------------------------------------------------------------------------------------------------------------------------------------------------------------------------------------------------------------------------------------------------------------------------------------------------------------------------------------------------------------------------------------------------------------------------------------------------------------------------------------------------------------------------------------------------------------------------------------------------------------------------------------------------------------------------------------------------------------------------------------------------------------------------------------------------------------------------------------------------------------------------------------------------------------------------------------------------------------------------------------------------------------------------------------------------------------------------------------------------------------------------------------------------------------------------------------------------------------------------------------------------------------------------------------------------------------------------------------------------------------------------------------------------------------------------------------------------------------------------------------------------------------------------------------------------------------------------------------------------------------------------------------------------------------------------------------------------------------------------------------------------------------------------------------------------------------------------------------------------------------------------------------------------------------------------------------------------------------------------------------------------------------------------------------------------------------------------------------------------------------------------------------------------------------------------------------------------------------------------------------------------------------------------------------------------------------------------------------------------------------------------------------------------------------------------------------------------------------------------------------------------------------------------------------------------------------------------------------------------------------------------------------------------------------------------------------------------------------------------------------------------------------------------------------------------------------------------------------------------------------------------------------------------------------------------------------------------------------------------------------------------------------------------------------------------------------------------------------------------------------------------------------------------------------------------------------------------------------------------------------------------------------------------------------------------------------------------------------------------------------------------------------------------------------------------------------------------------------------------------------------------------------------------------------------------------------------------------------------------------------------------------------------------------------------------------------------------------------------------------------------------------------------------------------------------------------------------------------------------------------------------------------------------------------------------------------------------------------------------------------------------------------------------------------------------------------------------------------------------------------------------------------------------------------------------------------------------------------------------------------------------------------------------------------------------------------------------------------------------------------------------------------------------------------------------------------------------------------------------------------------------------------------------------------------------------------------------------------------------------------------------------------------------------------------------------------------------------------------------------------------------------------------------------------------------------------------------------|
|           | <p>TGAATCTCAACTTGACCTCCCACGCAATTAAGGGTATCCAATGCTAA</p> <p>ATGCCGTCCCATCATGACCATGGCCATGTGGCTGAGCATCATCATCATCATCGAAGCCCAATACCCAG<br/>AAGACTAAATACTCCTCACAATGATAGCACCCTCCCTTAATCTGGCTAGCAGCCATTCTCTGCACAATCA<br/>TAGCCATAGGTGTTGTAATTGCAGGCATAGTAGTTTTTCATTGGTTATATGGTGATCCACCAAGAATCCCC<br/>ATCATAAGCATCACCATGCTCATCTGACCTTCTCAGAAACGACTATGCTGGTCTTCTACAAACCAACT<br/>TCGCATCATTTGGTGGCACAGAATGGAATGCTAAGGCTCATGCAACTTTTTCTGACATAAAGTTCAATG<br/>TTAGCTACCAAGGGCAAGGCATAGCAGTGATGGTTGCTGACCCTTTTGATGTTCCAAAGAACAAATTCAAAG<br/>ACACTCCCCTTATGTGGTTCAATCTGCTCCTATACCCTTAACCCCTGATCAGATGGAGGAAGTGGATGTTTC<br/>TTGGAACGAGATATCATTGGATTTGACATTAAGGGTAGCGCAAGAACACGGTGGAGAGTAGGACCTTTAG<br/>GTTCTGTTAGATTCTGGTGCACCTTTGGAGTGTCAACTCAAGTTTCACCCTTCCAATGGTAGTTACATTCCC<br/>AAACGCTGCACCTCTGAATCAAAATGA</p> <p>ATGTCAACATCTGATAAACCCAGAAGTAGTGAAAGGGGAAAGTAAGGATGGAAAACAAAAGGAAGATAATGA<br/>TGAGAAGGGTGGATTCTTTGATTTCAGTGAAGGGTTTCATTCAAGACATTTGGTGAGAAAGTAGGAGAACTA<br/>TAGGATTTGGGAAGCCAACTGCAGATGTTACAGGAATACACATTTCCATCAATCAATCTTGAGAAGGTAGAA<br/>CTTGTTGTTGATGTTCTCATAAAGAACCCGAATCCTGTGCCGATTCCCCTAATTGACATAAACTACTTTGGT<br/>TGAGAGTGATGGGAGGAACTAGTTTCAGGATTGATACCGGATTGAGGTACAATCCATGCACATGGAGAGG<br/>AGACAGTGAAAATTCCTCTTACTTTGGTTTATGATGACATAAAGAATACATATAATGATATTAACCTTGA<br/>AGCATAATTCCTTATAAGGTGAAGGTTGATCTCATTTGTTGATGTTCTGTCTTTGGAAGGCTCAGCTTACC<br/>TTTTGAGAAAACCTGGAGAAATTCCTGTTCCATACAGCCCTGATGTTGATCTTGAGAAAATTCAGTTTGAGA<br/>GGTTCTCTTTTGAAGAGACTGTTGCAATTCCTCATTTGAAGTTGGATAACAAGAATGACTTTGATCTTGGT<br/>CTCAACTCGCTCATTTAGAGGTGGGTTGTTGATGTTAGCATTGGAGGTGCAAGTTACCAACTCTGC<br/>AAAGATTGTGAAAACCTGGGATCACTGACATTGATGTTCCAATTACCTTCAGACCTAAGGATTTTGGTTCTG<br/>CACTTTGGGACATGATTAGAGGAAGGGGTACAGGATACAGTATTAAGGACATATGATGTTGACACTCCT<br/>TTTGGAGCAATGAAATTGCCCATTACCAAGAAGGTGGTACTACCCGTCTCAAGAAGAAAAGGAAGATGG<br/>TGAAGATGATGGAGGAGCTGATTGGAATTCAGTTTATGATCTTGTGTTGGCAGAAATTCATATCGAC<br/>ATAGTGGAGATGCTCAGAAACAAGGATGCTTCTCAAACTCACTCTTGAACAGTCTCCTTTAACTTGATT<br/>AGAGTAGTGTTTTTGGTATATCCTAAGGGATTGAAGAAGAAATGCGAGCCAGTTATAGTATCTGTTCTTTT<br/>ATTCACAGCTTA</p> <p>ATGCTTGCACCTCCACCACCCCCACCACCACCACCATCACTACCATCACCACCATCCCTAGCCATAAGGCA<br/>AACCAAGCAAGTTTCTCCTGGCCAAATTTGTCAAATCAAAACAGCCCATAGACAAAATTTCTCAAGAATTAG<br/>AAGCACCAGATTATACTACAACAAAGTCAATTAGGCCACTACCAAGATTAAAGGCAACCTCCATTTCAAAGG<br/>ACCAACCCAAATAATATGGTTTGGTGCAGTGTTGTGCCTCATTTTCAGCCTTGTGCTCATCTTCTTTGGAGT<br/>TGCAACTTTGATCATCTTCTCCTGGCATCAAAACGAAGAAATCCAACCTTTTGACATCCAAATGCAAACTCA<br/>ATGGATTGTATTTTGAATCACCAGAATACTTCAATGGTGACTTCACTCTCCTTGTAAATATTACCAATCCC<br/>AACAGGAAATGGATGTGAGGTTTGAAGTCTTTGGATGTTGATCTTTCTTCTCAGATAGGATCATATCAAC<br/>ACAGTCAATTCAGCCCTTTACTCAAAGGAGAAAGGAAAGCAGGTTGGAATCATTTGCACCTTCATATCCAGTT<br/>TGGTGTGTTTGGCTGAGGATCTTGGTGTAATCTTAAAGCAGGTTGCAAGGTAAACAGGTTAACTACAT<br/>GTGAGGGGAACCTTTTAAATGAGATAACTATGGGCTTCTTCCATTTATCTTATTTGGCTGCATAGCAGATG<br/>CCAGATAGAGATGACTAGTCCACCAACTGGGGTCTTGATAGCTAGGAACTGCATCACAAGAGATGA<br/>ATGTGAGATCATCAAGAATTCATCCTGTTTCATGATGTGGAGGCACACACAGACCCCTTGGTGCCAAAGTAA<br/>CATTTGGTAAATCAGATAAAGATGTTCAACCTCTTCTCAACGCACCATTCCTGTGATGCATTCAAAGCCAC<br/>CAAAAGAAAAGAACTGTTGCTGCAGGGTTCTATGTTGGACATTAAGCGTATTTGGTGATCTTATAATTTGCT<br/>CTTGCCATCACCATTGGGATACTATTCCTTGTGTTTAGGCCAAAGCTTCCCAATACTCAGTGGACCAACT<br/>GAGAATAAGCCAATTCAATGTTTCTGACAAACAATAGCCTTTATGTACCTTCAATGTGACAACTCACTGCAA<br/>GAAATCCAAACAAGAAAATGGGATATACTATGAGGGTGAAGCCACATAAGTCTGTTGATATAGGACACA<br/>CAACTATGTGAAGGGTCTTTGCCAAAGTTTCAACAGGTACAGGAACATCAGAGTGGTAACTCTGTTTCTT<br/>GACTGGTCAAGCACAGGATGCAACTGGCTTACAAAGTAGAATTACAGGAGCAGCTGCAGCAGACAAATAATA<br/>TTCCCTTTAATCTTAAGGTTAATCTGCCTGTGAGGGTTAAGCTTGGTAAATTTGAAGCTCTTCAAAGTCAAA<br/>TTCAGAGTTAGGTGCAGGCTTGTGGTGGATAATATTGGTGCTAATAATGATATTAATAATTTCAAGTAGTAG<br/>GTGTAAGTTCAAGGCTTAGGCTATGA</p> <p>ATGACCGATCCAGTTCATCTGAAAAACTCGCCCCACAATCCAACGACGCACAAACGTCGCCGCCTCATGA<br/>AGCTGCCGTACCTCAAATTCCTCCTCTCTGGCGGCAACCTACGTCATCCGTATCCCCAAGGACCAAGTCT<br/>ACCGCGTTCTCTCCGCCGAAAGTGCTCTTCGCTACGCCAACTACAGCCGCCGGAATAATCGTCGATCCCGG<br/>TGCTGCTGTGCGCTCTGCTGTTTCATCTCCATCGTCTTCTCCCTCGTCGTTCTCCTCGCCATTCGCCCTCGG<br/>CGTCTTCTACTTCGTTTTCGACCAAAAGGCGCCGACTATGCAATCGAGCGCGTGCCCGTGAAGGGAATGA<br/>ACCTCACGTCGCCGTGCTTCACAGCGGCATTATCACCAGGAGTTTACGCTCACTGTTTCGGGCAGACACGAT<br/>AATAGCAAGATCGGAATCTACTACGAGGATGGAAGTTCCCTTGAAATGTTCTACAATGACGCTAGGCTCTG<br/>TGATGGTGCATTGCCGGCGTTTTATCAGCCGTCAAACAACGTGACGGTGTTCGATACGCTTTTGAGGGGTA<br/>ACGGCATCGCACTCAGACATCGGACCAGACAGCATTTGGTGAATGATGTTGCCAAACAGAGCGTGCCGTTA<br/>ACGTTGAAGCTGAGGGCACCAGGTGAAAATTAAGTGGGATCTGTTAAGACGTGGAAGATCACCCTTAAAAAT<br/>TACCTGTAATGTGACGGTAGATCAGTTAACGATGAAGGCTAGGATTGTTAACAAGGACTGTAGATACCGGT<br/>TGGCTCTTTGGTGA</p> <p>ATGACTGATCCAGTTCATCTGAAAAACTCGCCCCACAATCCAACGACGCACAAACGTCGCCGCCTCATGA<br/>AGCTGCCGTACCTCAAATTCCTCCTCTCTGGCGGCAACCTACGTCATCCGTATCCCCAAGGACCAAGTCT<br/>ACCGCGTTCTCTCCGCCGAAAGTGCTCTTCGCTACGCCAACTACAGCCGCCGGAATAATCGTCGATCCCGG<br/>TGCTGCTGTGCGCTCTGCTGTTTCATCTCCATCGTCTTCTCCCTCGTCGTTCTCCTCGCCATTCGCCCTCGG<br/>CGTCTTCTACTTCGTTTTCGACCAAAAGGCGCCGACTATGCAATCGAGCGCGTGCCCGTGAAGGGAATGA<br/>ACCTCACGTCGCCGTGCTTCACAGCGGCATTATCACCAGGAGTTTACGCTCACTGTTTCGGGCAGACACGAT<br/>AATAGCAAGATCGGAATCTACTACGAGGATGGAAGTTCCCTTGAAATGTTCTACAATGACGCTAGGCTCTG<br/>TGATGGTGCATTGCCGGCGTTTTATCAGCCGTCAAACAACGTGACGGTGTTCGATACGCTTTTGAGGGGTA<br/>ACGGCATCGCACTCAGACATCGGACCAGACAGCATTTGGTGAATGATGTTGCCAAACAGAGCGTGCCGTTA<br/>ACGTTGAAGCTGAGGGCACCAGGTGAAAATTAAGTGGGATCTGTTAAGACGTGGAAGATCACCCTTAAAAAT<br/>TACCTGTGATGTGACGTGTAGATCAGTTAACGATGAAGGCTAGGATTGTTAACAAGGACTGTAGATACCTGT<br/>TGGCTCTTTGGTGA</p> <p>ATGGCCGACCGAGTTCATCCAAAAACTCGCCCCACAATCCAACGACGCACAAACGTCGCCGCCTCATGA<br/>AGCTGCCGTACCCAAAAACCTCGTCGCCGGCGGCAACCTACGTTATTCGTATCCCCAAGGACCAAGTCT</p> |
| CrLEA2-54 |                                                                                                                                                                                                                                                                                                                                                                                                                                                                                                                                                                                                                                                                                                                                                                                                                                                                                                                                                                                                                                                                                                                                                                                                                                                                                                                                                                                                                                                                                                                                                                                                                                                                                                                                                                                                                                                                                                                                                                                                                                                                                                                                                                                                                                                                                                                                                                                                                                                                                                                                                                                                                                                                                                                                                                                                                                                                                                                                                                                                                                                                                                                                                                                                                                                                                                                                                                                                                                                                                                                                                                                                                                                                                                                                                                                                                                                                                                                                                                                                                                                                                                                                                                                                                                                                                                                                                                                                                                                                                                                                                                                                                                                                                                                                                                                                                                                                                                                                                                                                                                                                                                                                                                                                                                                                                                                                                                                                                                                                                                                                                                                                                                                                                                                  |
| CrLEA2-55 |                                                                                                                                                                                                                                                                                                                                                                                                                                                                                                                                                                                                                                                                                                                                                                                                                                                                                                                                                                                                                                                                                                                                                                                                                                                                                                                                                                                                                                                                                                                                                                                                                                                                                                                                                                                                                                                                                                                                                                                                                                                                                                                                                                                                                                                                                                                                                                                                                                                                                                                                                                                                                                                                                                                                                                                                                                                                                                                                                                                                                                                                                                                                                                                                                                                                                                                                                                                                                                                                                                                                                                                                                                                                                                                                                                                                                                                                                                                                                                                                                                                                                                                                                                                                                                                                                                                                                                                                                                                                                                                                                                                                                                                                                                                                                                                                                                                                                                                                                                                                                                                                                                                                                                                                                                                                                                                                                                                                                                                                                                                                                                                                                                                                                                                  |
| CrLEA2-56 |                                                                                                                                                                                                                                                                                                                                                                                                                                                                                                                                                                                                                                                                                                                                                                                                                                                                                                                                                                                                                                                                                                                                                                                                                                                                                                                                                                                                                                                                                                                                                                                                                                                                                                                                                                                                                                                                                                                                                                                                                                                                                                                                                                                                                                                                                                                                                                                                                                                                                                                                                                                                                                                                                                                                                                                                                                                                                                                                                                                                                                                                                                                                                                                                                                                                                                                                                                                                                                                                                                                                                                                                                                                                                                                                                                                                                                                                                                                                                                                                                                                                                                                                                                                                                                                                                                                                                                                                                                                                                                                                                                                                                                                                                                                                                                                                                                                                                                                                                                                                                                                                                                                                                                                                                                                                                                                                                                                                                                                                                                                                                                                                                                                                                                                  |
| CrLEA2-57 |                                                                                                                                                                                                                                                                                                                                                                                                                                                                                                                                                                                                                                                                                                                                                                                                                                                                                                                                                                                                                                                                                                                                                                                                                                                                                                                                                                                                                                                                                                                                                                                                                                                                                                                                                                                                                                                                                                                                                                                                                                                                                                                                                                                                                                                                                                                                                                                                                                                                                                                                                                                                                                                                                                                                                                                                                                                                                                                                                                                                                                                                                                                                                                                                                                                                                                                                                                                                                                                                                                                                                                                                                                                                                                                                                                                                                                                                                                                                                                                                                                                                                                                                                                                                                                                                                                                                                                                                                                                                                                                                                                                                                                                                                                                                                                                                                                                                                                                                                                                                                                                                                                                                                                                                                                                                                                                                                                                                                                                                                                                                                                                                                                                                                                                  |
| CrLEA2-58 |                                                                                                                                                                                                                                                                                                                                                                                                                                                                                                                                                                                                                                                                                                                                                                                                                                                                                                                                                                                                                                                                                                                                                                                                                                                                                                                                                                                                                                                                                                                                                                                                                                                                                                                                                                                                                                                                                                                                                                                                                                                                                                                                                                                                                                                                                                                                                                                                                                                                                                                                                                                                                                                                                                                                                                                                                                                                                                                                                                                                                                                                                                                                                                                                                                                                                                                                                                                                                                                                                                                                                                                                                                                                                                                                                                                                                                                                                                                                                                                                                                                                                                                                                                                                                                                                                                                                                                                                                                                                                                                                                                                                                                                                                                                                                                                                                                                                                                                                                                                                                                                                                                                                                                                                                                                                                                                                                                                                                                                                                                                                                                                                                                                                                                                  |
| CrLEA2-59 |                                                                                                                                                                                                                                                                                                                                                                                                                                                                                                                                                                                                                                                                                                                                                                                                                                                                                                                                                                                                                                                                                                                                                                                                                                                                                                                                                                                                                                                                                                                                                                                                                                                                                                                                                                                                                                                                                                                                                                                                                                                                                                                                                                                                                                                                                                                                                                                                                                                                                                                                                                                                                                                                                                                                                                                                                                                                                                                                                                                                                                                                                                                                                                                                                                                                                                                                                                                                                                                                                                                                                                                                                                                                                                                                                                                                                                                                                                                                                                                                                                                                                                                                                                                                                                                                                                                                                                                                                                                                                                                                                                                                                                                                                                                                                                                                                                                                                                                                                                                                                                                                                                                                                                                                                                                                                                                                                                                                                                                                                                                                                                                                                                                                                                                  |
| CrLEA2-60 |                                                                                                                                                                                                                                                                                                                                                                                                                                                                                                                                                                                                                                                                                                                                                                                                                                                                                                                                                                                                                                                                                                                                                                                                                                                                                                                                                                                                                                                                                                                                                                                                                                                                                                                                                                                                                                                                                                                                                                                                                                                                                                                                                                                                                                                                                                                                                                                                                                                                                                                                                                                                                                                                                                                                                                                                                                                                                                                                                                                                                                                                                                                                                                                                                                                                                                                                                                                                                                                                                                                                                                                                                                                                                                                                                                                                                                                                                                                                                                                                                                                                                                                                                                                                                                                                                                                                                                                                                                                                                                                                                                                                                                                                                                                                                                                                                                                                                                                                                                                                                                                                                                                                                                                                                                                                                                                                                                                                                                                                                                                                                                                                                                                                                                                  |

|          |                                                                                                                                                                                                                                                                                                                                                                                                                                                                                                                                                                                                                                                                                                                                                                                                                                                                                                                                                                                                                                                                                                                                                                                                                                                                                                                                                                                                                                                                                                                                                                                                                                                                                                                                                                                                                                                                                                                                                                                                                                                                                                                                                                                                                                                                                                                                                                                                                                                                                                                                                                                                                                                                                                                                                                                                                                                                                                                                                                                                                                                                                                                                                                                                                                                                                                                                                                                                                                                                                                                                                                                                                                                                                                                                                                                                                                                                                                                                                                                                                                                                                                                                                                                                                                                                                                                                                                                                                                                                                                                                                                                                                                                                                                                                                                                                                                                                                                                                                                                                                                                                                                                                                                                                                                                                                                                                                                                          |
|----------|------------------------------------------------------------------------------------------------------------------------------------------------------------------------------------------------------------------------------------------------------------------------------------------------------------------------------------------------------------------------------------------------------------------------------------------------------------------------------------------------------------------------------------------------------------------------------------------------------------------------------------------------------------------------------------------------------------------------------------------------------------------------------------------------------------------------------------------------------------------------------------------------------------------------------------------------------------------------------------------------------------------------------------------------------------------------------------------------------------------------------------------------------------------------------------------------------------------------------------------------------------------------------------------------------------------------------------------------------------------------------------------------------------------------------------------------------------------------------------------------------------------------------------------------------------------------------------------------------------------------------------------------------------------------------------------------------------------------------------------------------------------------------------------------------------------------------------------------------------------------------------------------------------------------------------------------------------------------------------------------------------------------------------------------------------------------------------------------------------------------------------------------------------------------------------------------------------------------------------------------------------------------------------------------------------------------------------------------------------------------------------------------------------------------------------------------------------------------------------------------------------------------------------------------------------------------------------------------------------------------------------------------------------------------------------------------------------------------------------------------------------------------------------------------------------------------------------------------------------------------------------------------------------------------------------------------------------------------------------------------------------------------------------------------------------------------------------------------------------------------------------------------------------------------------------------------------------------------------------------------------------------------------------------------------------------------------------------------------------------------------------------------------------------------------------------------------------------------------------------------------------------------------------------------------------------------------------------------------------------------------------------------------------------------------------------------------------------------------------------------------------------------------------------------------------------------------------------------------------------------------------------------------------------------------------------------------------------------------------------------------------------------------------------------------------------------------------------------------------------------------------------------------------------------------------------------------------------------------------------------------------------------------------------------------------------------------------------------------------------------------------------------------------------------------------------------------------------------------------------------------------------------------------------------------------------------------------------------------------------------------------------------------------------------------------------------------------------------------------------------------------------------------------------------------------------------------------------------------------------------------------------------------------------------------------------------------------------------------------------------------------------------------------------------------------------------------------------------------------------------------------------------------------------------------------------------------------------------------------------------------------------------------------------------------------------------------------------------------------------------------------------|
|          | ACCGCGTTTCCTCCGCCGAAATGCTCATCTACTACGCCAACTACACCCGCCGAAATATCGTCGATCTCGG<br>TGCTGCTGTTGCCTCTGCTGGTTTCATCTCCATCGTCTTCTCCCTCGTCTCTCTCGCCATTGCCGCCGG<br>CGTCTTCTACTTCGTTTTCGACCAAGGCGCCGACTATACAATCGAGCGCTGCGCTGAAGGGAATGA<br>ACCTCACGTCGCGCTCGTTTACAGCGGCATTATCACCGGAGTTTGACGTCATGTTGCGGCGAGACACGGC<br>AATAGCAAGATCGGAATCTACTACAGGATGGAAGTTCCGTTGAAATGTTTACACACGCTAGGCTCTG<br>TGACGGCTCATTACCGCGCTTTTATCAGCCGTCAAACAACGTTACGATGTTTCGAGATGGTGTGAGGGGTA<br>ACGACATCGCACTCACGGCATCGGACCAGACGGCGCTGGTGAATGACGTTGCCAAACGGAGCGTGCCGTTA<br>ACATTGAAGCTGAGGGCACCGGTGAAATTAAGTGGGATCTGTTAAGACGTGGAAGATCATGTTAGTAT<br>TGACTGTGATGTGACGGTAGATCAGTTAACGGCGAAGGCTAGGGTTGTTAACAAGGATTGTAGATACCGAT<br>TGGCTCTTTGGTGA<br>ATGGCCCGCTCTCTCACAACCCAACCGTCTTGGTTTCATCGTTGCCCAATCTATCTCCCTAATACCTGT<br>TTATCGGCGAGGTTATTTCAGCCGCTCAGATGTTTTAGGAAGAGTTGGATTGGGTATTATTGCACGCAGGA<br>GTGGAATGGTGGGAAGGACAGAGGAGAAGCCTGTAACAAGAGATGGTTCGGAGGCCTACTCGGCTTGGGCC<br>CCTGACCCAGTAACGGGTTATTATCGGCCCATCAACCACACCCCTGAAATTGACGCGGTGGATCTTCGCCA<br>GATGCTTCTCAACCACAAGCTTAGATCACCCACTAG<br>ATGGCTAATTTCTTCTCAGGAAGCATGTTATGGTGTGTAGCGGAATGTTAAGGTTGGAGATGGAAAG<br>CACGATGGTGAAGCGAAAGCAGCATCCCCAATGGTAATCCAATAAAGATGAAATCTTTTGGATGAGAG<br>ATCCTAAGAGTGGAAATTTGATTCCAGAGAATCATTTTGGCGAAGTTGATGCTGCCGAGCTGAGGAACAAG<br>TTTCTGCCAAGACACAAAACTTCCAATCAACTTAAGTAA<br>ATGGCTCGCTCTTTCACTAACGCCAAGATTTCTCTGCTGCTGCTGATGGATTCCCTAGCGTTTTTCAC<br>CAGACGTGGGTACGCGGTAGCAACACAAAGCGCAACAAGGGGAGGAACGGCCTCTATAAGCGGCAAGGTGG<br>CACCCAAGGCTGTGGAAGACAAAGTGGCCTCCAACAACAAGGTTTCGTGGGTGCCAGATCCTGTTACTGGT<br>TACTACAAACCCGAGAACATCAACGAAATTGACGTTGCTGAATTGCGCCAGACCCCTTCTACGCAAAAAATT<br>CAACAACCTGA<br>ATGGCTCGCTCTTTCCGCCAACGCCAAGGTTCTCTGCGCTCGTAGCCGACGGATTCTCCAACACTCTTAC<br>CAGACGTGGTTACGCGGCGGCGACACAAAGCGCAACAAGGGGAGGAGCTGCCTCCATTAGCGGCAAGATAG<br>CCCCAAAATCAGGGGAAGACAAAGTGGCCGCTACTGAAAAGGTGTGCTGGGTCCCAGACCCCGTTACTGGG<br>TACTACAAACCCAGAGAACACCAAGAAATTGATGTGCTGAGCTGCGAGCAACGCTTCTCGGCCAAAAAATT<br>CAACCTCTAA<br>ATGGTTAGAAGCGGCATCACCAAGCAAACATGTTGCTTCTCCGGTCATGCGAGGGAACTGAGAGAGCAAA<br>GAGTGGACTGAGCAAGTTGTTACCTGCTGCTACAGAAAATCTGGAGGAATTTCAAAGAGTAGTGGGAAGA<br>TGGAAAATTCAGAAATTGTGGGTCCACATCCACGCACAGGAATTTATTTCCCAAAAGGGCATGAATGGGTG<br>ATGGATGATGTTCCAGAGGATGCAGCTCGTTTAAAGTCAGACTCACTGGTTCAGAAATATTGATGGTGTGGA<br>CAATCCCAATACCAAACTTGA<br>ATGGCATGCTCTTTCCGCACAAGCCAAACGCGTCTCTGCTCTTTCATCGGCGAGGGTATGCAGTGAT<br>GTCTGATGCTTCGGTGAGAGGGGGATTGGATAGGATTGGGAGTGGGAGTAGGAGTAGGATGGATCAACGG<br>TGGTGGGGAAGGTTGAAGAGAAGAGTGTGTCCAAAAGTGGTTCGGAGGGTTCTTCAGCTTGGGCCCCAGAC<br>CCAGTCACGGGTACTACAGGCCCATCAATCACACCAATGAGATTGACCCGGTGGAGCTCCGAGAGATGCT<br>TCTGAATCACAGAGTCAGATCTTCATCCCTTAA<br>ATGGCGTTCGAGGCAAGAATTCAAGGAAGACAGAGCGGAAGCAGCAGCAAGCTAGCTGCGAAAGACATTGG<br>CCATGTGAACAGAACAAACGAGCGTGAGGAAAGTTACACACTGCATTCCGATATTCACTTTAAGGAAGCAC<br>GAGCGGAGGCAGCAGCGAAGCTTGCTGCTAAGGATCTTGAAGACGTTAACAGAGCAAGAGAGAGTGCATTT<br>CGTGAAAAACAACGTTATTGTGATGAGCAGAAACCCGGTGTGATAGGGTCCATGTTTAGAGCCGCGAAAGA<br>AGCTGTGGTTGGCAAGCCTCACAGGGGTGTGGAAGTGAGGGATAGAGGTACCTCAGCTGGGTTTATGATT<br>ACACCACCCAGAAGACCACCGAAACAAAGGATGCAACGAAGCAAAAGGCTGGGGAATATGCAGATTATACG<br>TCTCAGAAAGCGAAAGAAGCAAAAGACAAAGCAGGGGAGTACAAGAACTATGCTGCAGATAAAATGAAGGA<br>AGCTGGAGATGCGACAATGAACAAAGCTAAGGAAGCTAAAGACGCGACGATGCAGAAGGCAGGTGAGTATA<br>AAGACTATACAGCTGAGAAGACAAAGGACGAGAGTGCAGCGGGGAAGCTGGGGAGCTGAAGGAT<br>TCTGCTGCTGATGCAGCCAAAAGGGCTATGGGTTTCTTCGCTGGCAAGAAAGAGGAAACAAAGGAAAAGCT<br>GAGCGGAACAGAGGAAGAAGCGATGAGGAAAATGGAACATGTGAAGGTGGAAGATAGGAAATATGGAGGAG<br>GAGGAGGAGGAAAGATGGAGATAAAAGTGAAGAGTCTCGGCCAGGGGCAATGGTGGATGTGCTACGGGCT<br>GCAGATAAGGCTCTGAACAATGTGGGACGTTGGATGAAGAAGGTGTGATTATGTTGGAGCGTGGTCTGTGA<br>GAAAATGTGA<br>ATGGCGTCAAGGCAACAACCCGAGGACAGAGCCGAGGCTGCAGCCAAAGTTGCTTCTAAAGAACTCGAGCA<br>AGTTAACAAGGCCAGAGACCATAATTTGGCTATCGAGGACCAACAACAACATGACCAAGAAAAGCGTGGTG<br>TAATTAGCTCCGTTCTAAGAGCAGTGCAAGGAACCTACGAGAACGCAAGGGAGCTGGTTGGCAAAAA<br>GACCTGCGGATCCCTATACCACAGAGGTAGTTTCATCATGTTAACGTTGAGGATGAAGATGCACGAACCGG<br>AGAAGTTAGAGACATATCGCCAAACAAAGCAGGTTCTAAAGTTGAGAGATATGCAGATTACGCATCTCAGA<br>AAGCCAAGGAAACAAAGGATGCAACGGCGCAAAAGGCGGGAGAGTACGCCGATTATGCATCTCAGAAGGCA<br>AAGGAAGCTAAGGATAAGACAATGGAGAAAGGTGGAGAATACAAAGACTATGCCGAGAGAAAGCGGAAGGA<br>AGCGAAAGATGCGACAATGAATAAGGCAGGGGAGTATAAGGATTACACCGCTGAGAAAACGAAAGAGGAA<br>AGGACACAACGATGGGGAAGCTTGGAGAGTTAAAGGACTCTGCTACTGATGCTGCTAAGAGAGCTGTGGAT<br>TACTTGAGCGGAAAGAAAGAGGAACAAAAGAGAAGGCTGCAGAACTGCAGAGGCGACCAAAAATAGAAC<br>GTCCGAGACTGCTGAGACGGCGAAGAAGAAAGCTACGGAGATGAAGATGCGGCAAGGAAAGGAAAGCTGCAG<br>AAACCACCGAGGCGACCAAAAATAGAACTTCCGAGACTGCTGAGACGGCAAGAAAGAGGAAAGCTGCGGAGATG<br>AAAGATGCGGCGAAGGACAAAGCTGCAGAAACACCGAGGCGACCAAAAATAAAACCTCCGAGACTGCTGA<br>GACGGCGAAGAAGAAAGCTACGGAGATGAAAGATGCGGCGAAGGCAAAAGCTGCAGAAATCCACCGAGGCAG<br>CTAAGCAGAAAATGCAGAGGCAAGGACAAGACGAAGGAAAATGTGAGTGGAGGGGAGGAAGATAGT<br>AGAAGGAAAATGGAAGAACTCAAGGTGCACGGGAAAGGATACGGTGAGGAACCTGAGCGCGTGGTGAGGA<br>TAAGGTGGTGTGAGAGTCAAGAAAGTCGACCGGGAGCGGTGGCGGAAACGCTGAAAGCCACGGATCAGA<br>TGACGGGGCAGACCTCAATGATGTGGGAAGGATGGATGATGAAGGGGTCAATGTTGGAGCGAGCTAAC<br>AAATAA<br>ATGGCATCAAAACAACAAAATCGACAAGAATTGACGAGAGGGCAAGCAAGGAGAACTGTAGTTCCCTGG<br>TGGCACTGGTGGCAAGAGCCTTGAAGCTCAACAACATCTTCTGTAAGGAAGGAGCAGAGGAGGGCAACAA<br>GGAAGGAGCAGCTGGGAACAGAAGGATACCAAGAGATGGGTGCGAAAGGTGGATTGAGTTCTATGGACAAA<br>TCAGGTGGAGAACGTGCTCAAGAAGAAGGCATTGACATTGATGAGTCTAAGTTCACTACTGCTTCTAGGAA |
| CrLEA3-1 |                                                                                                                                                                                                                                                                                                                                                                                                                                                                                                                                                                                                                                                                                                                                                                                                                                                                                                                                                                                                                                                                                                                                                                                                                                                                                                                                                                                                                                                                                                                                                                                                                                                                                                                                                                                                                                                                                                                                                                                                                                                                                                                                                                                                                                                                                                                                                                                                                                                                                                                                                                                                                                                                                                                                                                                                                                                                                                                                                                                                                                                                                                                                                                                                                                                                                                                                                                                                                                                                                                                                                                                                                                                                                                                                                                                                                                                                                                                                                                                                                                                                                                                                                                                                                                                                                                                                                                                                                                                                                                                                                                                                                                                                                                                                                                                                                                                                                                                                                                                                                                                                                                                                                                                                                                                                                                                                                                                          |
| CrLEA3-2 |                                                                                                                                                                                                                                                                                                                                                                                                                                                                                                                                                                                                                                                                                                                                                                                                                                                                                                                                                                                                                                                                                                                                                                                                                                                                                                                                                                                                                                                                                                                                                                                                                                                                                                                                                                                                                                                                                                                                                                                                                                                                                                                                                                                                                                                                                                                                                                                                                                                                                                                                                                                                                                                                                                                                                                                                                                                                                                                                                                                                                                                                                                                                                                                                                                                                                                                                                                                                                                                                                                                                                                                                                                                                                                                                                                                                                                                                                                                                                                                                                                                                                                                                                                                                                                                                                                                                                                                                                                                                                                                                                                                                                                                                                                                                                                                                                                                                                                                                                                                                                                                                                                                                                                                                                                                                                                                                                                                          |
| CrLEA3-3 |                                                                                                                                                                                                                                                                                                                                                                                                                                                                                                                                                                                                                                                                                                                                                                                                                                                                                                                                                                                                                                                                                                                                                                                                                                                                                                                                                                                                                                                                                                                                                                                                                                                                                                                                                                                                                                                                                                                                                                                                                                                                                                                                                                                                                                                                                                                                                                                                                                                                                                                                                                                                                                                                                                                                                                                                                                                                                                                                                                                                                                                                                                                                                                                                                                                                                                                                                                                                                                                                                                                                                                                                                                                                                                                                                                                                                                                                                                                                                                                                                                                                                                                                                                                                                                                                                                                                                                                                                                                                                                                                                                                                                                                                                                                                                                                                                                                                                                                                                                                                                                                                                                                                                                                                                                                                                                                                                                                          |
| CrLEA3-4 |                                                                                                                                                                                                                                                                                                                                                                                                                                                                                                                                                                                                                                                                                                                                                                                                                                                                                                                                                                                                                                                                                                                                                                                                                                                                                                                                                                                                                                                                                                                                                                                                                                                                                                                                                                                                                                                                                                                                                                                                                                                                                                                                                                                                                                                                                                                                                                                                                                                                                                                                                                                                                                                                                                                                                                                                                                                                                                                                                                                                                                                                                                                                                                                                                                                                                                                                                                                                                                                                                                                                                                                                                                                                                                                                                                                                                                                                                                                                                                                                                                                                                                                                                                                                                                                                                                                                                                                                                                                                                                                                                                                                                                                                                                                                                                                                                                                                                                                                                                                                                                                                                                                                                                                                                                                                                                                                                                                          |
| CrLEA3-5 |                                                                                                                                                                                                                                                                                                                                                                                                                                                                                                                                                                                                                                                                                                                                                                                                                                                                                                                                                                                                                                                                                                                                                                                                                                                                                                                                                                                                                                                                                                                                                                                                                                                                                                                                                                                                                                                                                                                                                                                                                                                                                                                                                                                                                                                                                                                                                                                                                                                                                                                                                                                                                                                                                                                                                                                                                                                                                                                                                                                                                                                                                                                                                                                                                                                                                                                                                                                                                                                                                                                                                                                                                                                                                                                                                                                                                                                                                                                                                                                                                                                                                                                                                                                                                                                                                                                                                                                                                                                                                                                                                                                                                                                                                                                                                                                                                                                                                                                                                                                                                                                                                                                                                                                                                                                                                                                                                                                          |
| CrLEA3-6 |                                                                                                                                                                                                                                                                                                                                                                                                                                                                                                                                                                                                                                                                                                                                                                                                                                                                                                                                                                                                                                                                                                                                                                                                                                                                                                                                                                                                                                                                                                                                                                                                                                                                                                                                                                                                                                                                                                                                                                                                                                                                                                                                                                                                                                                                                                                                                                                                                                                                                                                                                                                                                                                                                                                                                                                                                                                                                                                                                                                                                                                                                                                                                                                                                                                                                                                                                                                                                                                                                                                                                                                                                                                                                                                                                                                                                                                                                                                                                                                                                                                                                                                                                                                                                                                                                                                                                                                                                                                                                                                                                                                                                                                                                                                                                                                                                                                                                                                                                                                                                                                                                                                                                                                                                                                                                                                                                                                          |
| CrLEA4-1 |                                                                                                                                                                                                                                                                                                                                                                                                                                                                                                                                                                                                                                                                                                                                                                                                                                                                                                                                                                                                                                                                                                                                                                                                                                                                                                                                                                                                                                                                                                                                                                                                                                                                                                                                                                                                                                                                                                                                                                                                                                                                                                                                                                                                                                                                                                                                                                                                                                                                                                                                                                                                                                                                                                                                                                                                                                                                                                                                                                                                                                                                                                                                                                                                                                                                                                                                                                                                                                                                                                                                                                                                                                                                                                                                                                                                                                                                                                                                                                                                                                                                                                                                                                                                                                                                                                                                                                                                                                                                                                                                                                                                                                                                                                                                                                                                                                                                                                                                                                                                                                                                                                                                                                                                                                                                                                                                                                                          |
| CrLEA4-2 |                                                                                                                                                                                                                                                                                                                                                                                                                                                                                                                                                                                                                                                                                                                                                                                                                                                                                                                                                                                                                                                                                                                                                                                                                                                                                                                                                                                                                                                                                                                                                                                                                                                                                                                                                                                                                                                                                                                                                                                                                                                                                                                                                                                                                                                                                                                                                                                                                                                                                                                                                                                                                                                                                                                                                                                                                                                                                                                                                                                                                                                                                                                                                                                                                                                                                                                                                                                                                                                                                                                                                                                                                                                                                                                                                                                                                                                                                                                                                                                                                                                                                                                                                                                                                                                                                                                                                                                                                                                                                                                                                                                                                                                                                                                                                                                                                                                                                                                                                                                                                                                                                                                                                                                                                                                                                                                                                                                          |
| CrLEA5-1 |                                                                                                                                                                                                                                                                                                                                                                                                                                                                                                                                                                                                                                                                                                                                                                                                                                                                                                                                                                                                                                                                                                                                                                                                                                                                                                                                                                                                                                                                                                                                                                                                                                                                                                                                                                                                                                                                                                                                                                                                                                                                                                                                                                                                                                                                                                                                                                                                                                                                                                                                                                                                                                                                                                                                                                                                                                                                                                                                                                                                                                                                                                                                                                                                                                                                                                                                                                                                                                                                                                                                                                                                                                                                                                                                                                                                                                                                                                                                                                                                                                                                                                                                                                                                                                                                                                                                                                                                                                                                                                                                                                                                                                                                                                                                                                                                                                                                                                                                                                                                                                                                                                                                                                                                                                                                                                                                                                                          |



|          |                                                                                                                                                                                                                                                                                                                                                                                                                                                                                                                                                                                                                                                                                                                                                                                                                                                                                                                                                                                                                                                                                                                                                                                                                                                                                                                                                                                                                                                                                                                                                       |
|----------|-------------------------------------------------------------------------------------------------------------------------------------------------------------------------------------------------------------------------------------------------------------------------------------------------------------------------------------------------------------------------------------------------------------------------------------------------------------------------------------------------------------------------------------------------------------------------------------------------------------------------------------------------------------------------------------------------------------------------------------------------------------------------------------------------------------------------------------------------------------------------------------------------------------------------------------------------------------------------------------------------------------------------------------------------------------------------------------------------------------------------------------------------------------------------------------------------------------------------------------------------------------------------------------------------------------------------------------------------------------------------------------------------------------------------------------------------------------------------------------------------------------------------------------------------------|
|          | CTAG                                                                                                                                                                                                                                                                                                                                                                                                                                                                                                                                                                                                                                                                                                                                                                                                                                                                                                                                                                                                                                                                                                                                                                                                                                                                                                                                                                                                                                                                                                                                                  |
| CrLEA5-2 | <p>ATGAACCTTTCTTCTTTCACTTGTGTGAGCAATCATAAAGTTTTTCCCTTGGCTAACACTCGTAATTATCA<br/> TCCTCATTAGTTCCCTTGC AAAAGGCAAAAAGAGTCCTTAGAAGAAAAGTTTGTAGTGTGAATAACATGG<br/> CATCTCAGCAACAAAACCGTGAAGAGCTTGATGAGAAGGCAAGGCATGGTGAACCTGTGGTTCTTGGAGGC<br/> ACTGGTGGGAAGAGTCTAGAAAGCTCAAGAAAACCTTGCTGAAGGAAGGAGCGCTGGAGGGCAAAACAGGAA<br/> GCAGCAGCTAGGATCAGAAGGGTATCATGAGATAGGAACCAAAGGAGGGGCAACAAGGAAGGAACAGATGG<br/> GAACAGAAGGGTACAAAAGATGGGGCGCAAGGAGGGCTTAGCACTATGGACAAGTCTGGTGGAGAGCGT<br/> GCTGAAGAGGAAGGCATTGACATTGATGAGTCTAAGTTTAGGAATCACTAA</p>                                                                                                                                                                                                                                                                                                                                                                                                                                                                                                                                                                                                                                                                                                                                                                                                                                                                                                                                                                                                               |
| CrLEA6-1 | <p>ATGGCAAAACACGGGAAGCAAGTGAACACAAAACAGGAGAGTGCCCTAATCGCAAGAGAAAAGGAAAGAT<br/> AGAAATGTTGCCTTTGGAAATTAGTCCATGCGTTAAATACAATGATGTACAAAAGAATAACAATCGCAATG<br/> CTTATGACACACAACGCCATCTTCAGCCAAAACCAACCAAGCAGGTGGAACCACACACATTGCTCCTACT<br/> CCCTCAGATGCTCCATTGAAATTAACCACTAAATAG</p>                                                                                                                                                                                                                                                                                                                                                                                                                                                                                                                                                                                                                                                                                                                                                                                                                                                                                                                                                                                                                                                                                                                                                                                                                                                                      |
| CrLEA6-2 | <p>ATGGAGAATCAAACTGAGAAAAAGGCAGAGAGTGAATCAGGTAAAGAAGGACTTCCGATGAAGGATAGTCC<br/> TTACCTGCAATACAAGGATGTGGAGGACTATAAGCGTCAAGGTTATGGCACCCTATGGTCAATCAAGAACCAA<br/> ACCCAAATCAAGGAGCTGGTGCCACTGAGGCACCCACTCTCTCTGGTGCTGCTGTTTCCCTCTGAATCTGAA<br/> TTCAAAGCCACTGATGCCATTAATCGCAAGGGACCCGATGCATCTAAAGCTATGGTAGAGAGCAGCATCAA<br/> ACCAACCAACCCGTTCTTTTCGTTACATGGCGACAAAAGACGTGAAAGGAAAATGGAACAAAGCGGAAG<br/> AAGAAGAAGATGAGGAAGAGGAAGAAGCATTTGTCTCTTTGCGATCTTCCGATCAACCTGGAAGCCCCAACCG<br/> AGAAATCAAGAACACAAACATGTCAACGAAGCAACACAAGAAGAATTCAATTTCCGCTCTTGGAGTGGTTTT<br/> CTTTTCCAAAGAACCAGAAATGTGTGTGCGGATGAAGTTTTCTTTAAAGGTCAAATTTCTCCCAATGCGTCT<br/> TCTCGTTTACGACCCGAGGTGTTTATTAACACAGGATCTCAACATTATGCTAAGCGATTATGCAACGAG<br/> TCCTTGGATCATGCTTCTCTCGGTGATTTTCAAAGTAATAATAGCAGTAGAAGCAGTAGTGTAGAAAGTCA<br/> AAATTCGTCAAGTAGCACCAGCTCCACCACCACCACCACCACCTACAACAACAGCAGCAGCACCACCAC<br/> GATTTAAACCTAGCGTTAGAAACCAATTTACACGCGACCCCTAGTCCGAAACCTCAATTAAGAGTATCTGCT<br/> CCAAGACAATTAGTTATCAAGGTAGAAAATCATCATCAGCATGGGAAATTTCCGTTTGGGTGTGGTCCCT<br/> TGCTCCCGAAATAGGATTGCAAGACCTCAAGGTTTCGAGTAGCAACAGTGCGAACAGGAAGTGTGTGAGTC<br/> GCAATAGTAGTAGCAGTAGCAACAACAGTCTTCCAATAGTAATGCGAAAAGTGTGAAAACGAGTAAATGAT<br/> GGCAACAAGAGCAATCATGTTTTGAAACAGTTAATTGGCAAAAGCGGTGGTTTATTGAGTGGTTGTGATTG<br/> TTCTTTTGAACCGGTGCAATCGAACATGGTAATGATCAAAGGTGGTAAAGCACCACAAGCGCAGAAAGTA<br/> CAACGCACGCGGTGAAAGAAAAAGTGGTGAATTGAAGAAGCAGAAGCAGAGGCAAAAGCAGGGAAGAAAG<br/> GTTATGTCTCGTCTCGAACGTTTGAATGGTTAAAGGAGCTTCATGCAAGCCATGATCCTGATGATGAGAA<br/> GGCTTTGTTATCAAAACCATCATGA</p> |
| CrDHN1   | <p>ATGGCAAATTATCAGAACCAGTACGGTGCGGTTCTTACAAGCAAGGATCTGATTCAAGGAAATGGACAC<br/> CACCGGAGACACCCTGCGGTTGGCGGTGGCAGTGGCAGTACTAAAGTGGTAGGAGATGATTATGATAGAA<br/> GCAGCGCTGACACTACGGGTGTGAGCGAGCAGCATCACAAGAAAGGAATAATAGAGAAAAATAAAGAGAAG<br/> CTTCTGGAACACATCATCAACAACAGTAG</p>                                                                                                                                                                                                                                                                                                                                                                                                                                                                                                                                                                                                                                                                                                                                                                                                                                                                                                                                                                                                                                                                                                                                                                                                                                                                              |
| CrDHN2   | <p>ATGGCAGAGGAAATCAGAACAAAGTTGAGACCACTGAGAGCAGTGAAGGGGAGATCAAGGATCGTGGTCT<br/> TTTTGATTTCCTCGGTAAGAAAAAGGAAGAAAGAAAGCCTCAAGAGGAGGTCATCGTACCCGAGTTTGAGA<br/> AGGTACAGTGTGAGAAGAGAAAAAGAACGAAAGGAGAGAAGAACACAGTCTCTTAGAAAAGCTTCAC<br/> CGATCCGACAGCAGCTCAAGCTCTTCGAGCGAGGAGGAAGGAGAAGAAAGGGGAGAAGAAAGAAAGAAAA<br/> GAAGGAAAGAAGGGATTGAAGGAGAAGATCGAGGAGAAGATAGGGGATGATCACAAGCACGAGGACACAA<br/> GTGTTCAGTTGAGAAAGTTGAGGTGGAAAAAGTTGAGGTTGAAAAAGTTGAAGTTGATCCGACACACACT<br/> GAGGAAAGAAGGGTTTCTCTGACAAAATTAAGGAGAAGCTACCAGGTCAACAAGAAGACAGAGGAGGTTCC<br/> ACCACCACCACCGCCACCTGCTGCTGCATCATCAGAACATGGTGAGGGTGTCTATGAGAAGAAAGGTATTT<br/> TAGAGAAGATAAAAGAGAAGCTTCTTGGTTATCACCCCAAGACAGAGGAAGAGAAACAAAAGGAGAGTGCC<br/> GGTACTGA</p>                                                                                                                                                                                                                                                                                                                                                                                                                                                                                                                                                                                                                                                                                                                                                                                                                          |
| CrDHN3   | <p>ATGTCTGAAGCCCAACTACGAGACCAACATGGCAACCCTGTCCAATTCACCGATCAATACGGTAACCCGGT<br/> TACATTGACCGATGAGCATGGTCAACCCGTCCAGCTCAAGGGCGTGGCAACCCTGGTGGTGCAACCACGG<br/> GCACAGCAGGATCTGGATTGGAACATATGGTACTGGTGCATACGCGGTGGTGCAGCCACAGGCACAACC<br/> ACCGTCGCAGATCTGATAGCAACCGAGCGAGCTGAAATGCCAAGTCCGACGATCATCAGAGGGAGCC<br/> TGGAGAGCTTCGTCTCTCTAGTTCAAGCTCTAGCTCGTCTGAGGATGATGGCCATGGTGGGAGGAGGA<br/> AGAAGAAAGGACTGAAGGATAAAATAAAGAAAAGCTACCAGGGGTAGGAGGTGAACGAAAAGATCATGCA<br/> CACACACCTACAACCACCACCCTACATCCTTTGGTACTGGTGTACCCACCACCAGCCACCACCAGCCAC<br/> CCACCTCATCAGCATGAGAAGAGGGCATATGGAAAAGATTAAAGAAAATTTCCCTGGCCATCACACCA<br/> ACTGA</p>                                                                                                                                                                                                                                                                                                                                                                                                                                                                                                                                                                                                                                                                                                                                                                                                                                                                                                                  |
| CrDHN4   | <p>ATGGCAGAGGAGAAGCTGAACAAGAGTCATGAGTACGATACCACTTCCACCAATACTGAAACTGAGATCAA<br/> AGACCGTGGAGTTTTTTGATTTCTCGGTAAGAGAAAGGAAGAGAAGCCTCAGGAGGAGGTGCTAGCCA<br/> CAAAATTTTGACAATAAGGTCAAGCTTTCCAATGAACCCGAGACCAAGCTCCAAGAGCAAGGAAGGACAAG<br/> AAGCACACCTCTTAGAGAAGCTCCACCGATCCAACAGTAGCTCCAGCTCTTCCAGTGATGAGGAGGAGGA<br/> AGGAGAAGGTGGGGAGAAGAAAGAAAGAAAGAAAAGGAAAGAAAGGGCTGAAGGAAAAGATAGGAGGTG<br/> ATGATCACAAGGAACAGGACACTGCTGTTCCAGTTGAGAAAGTGGAGGTTGATTGAGAGCACCCTGACACT<br/> GAGGAAAAGAAGGGTTTCTTGACAAGATTAAAGGAGAAGCTGCCAGGTGACGACAAGAAGGCAGAGGAAGT<br/> GTCCCGACATCATCGGAATATGTTGCTGCACACACTGCTGAGACTCATGAAGGGGAGGCTAAGGACAAGG<br/> AGAAGAAGGGCCTTTTAGATAAGATCAAGGAGAAGCTTCCGGGTTATCACTCCAAGCCAAATGAAGACAAA<br/> GAAAAGGAGACCGATACTCATTGA</p>                                                                                                                                                                                                                                                                                                                                                                                                                                                                                                                                                                                                                                                                                                                                                                                                         |
| CrDHN5   | <p>ATGGCAAGTTATCAGAGTCAATACGGTGATCAAGGTGCTAAGACCGATCAGTATGGAACCCCTGTGACTCA<br/> AACTGACCAATACGGTAACCCCTGTGAGACAAACCGGTGAAACCGGTAAAGCAATATGGAACCCCGGTACG<br/> GAGTTAACTGCGGACACTGGCTCGGGTCATAGAAGTGAACCACTGGTGGCTATGGAACCTCGCACTGAG<br/> GGTGTAGGCGCGGGTTATGGAACCACTGGTGGCACCACCCTGGTTATGGTGCCACTGATTATGGAACAC<br/> CGGTGGCACCCTACTGGTTATGGTGGCACTGATTATGGCACCACCGGTGGCACCAGGTGGTACCGGTTATG<br/> GAAGTGAACAGGAACCTACCGGTGGCACTGGTTATGGAAGTGAACCGGTATGGAATCAACACTGGAGGT<br/> GCACATACTGATGCAAGGTATGGGAGGAGCATCGTCATGGACATGACCACTCTCATGGTGGGTATGATGC<br/> ATCGGGGGAGCAACATCATGAGAAGAAAGGGATAATGGATAAGATCAAGGAGAAGCTTCTTGAACCTGGAG<br/> GACACAACGAGAAGTAG</p>                                                                                                                                                                                                                                                                                                                                                                                                                                                                                                                                                                                                                                                                                                                                                                                                                                                                                             |
| CrSMP1   | <p>ATGCAATCTGCCCGCCGTC AACACCGACGCTGGCATCGTTGGCCGGCAAGACATATCGGACGTGGCTAG<br/> AGAGCAAGGCGTGAGCGTATCCCAAACAAAAGTGGGTGTGAACCGTGTGATCACAGAGTCCGTGGGAGGGC</p>                                                                                                                                                                                                                                                                                                                                                                                                                                                                                                                                                                                                                                                                                                                                                                                                                                                                                                                                                                                                                                                                                                                                                                                                                                                                                                                                                                                            |

|                    |                                                                                                                                                                                                                                                                                                                                                                                                                                                                                                                                                                                                                                                                                                                                                                                                                                                                                                                                                                                                                                                                                                                                                                                                                                                                                                                                                                                                                                                                                                                                                                                                                                                                                                                                                                                                                                                                                                                                                                                                                                                                                                                                                                                                                                                                                                                                                                                                                                                                                                                                                                                                                                                                                                                                                                                                                                                                                                                                                                                                                                                                                                                                                                                                                       |
|--------------------|-----------------------------------------------------------------------------------------------------------------------------------------------------------------------------------------------------------------------------------------------------------------------------------------------------------------------------------------------------------------------------------------------------------------------------------------------------------------------------------------------------------------------------------------------------------------------------------------------------------------------------------------------------------------------------------------------------------------------------------------------------------------------------------------------------------------------------------------------------------------------------------------------------------------------------------------------------------------------------------------------------------------------------------------------------------------------------------------------------------------------------------------------------------------------------------------------------------------------------------------------------------------------------------------------------------------------------------------------------------------------------------------------------------------------------------------------------------------------------------------------------------------------------------------------------------------------------------------------------------------------------------------------------------------------------------------------------------------------------------------------------------------------------------------------------------------------------------------------------------------------------------------------------------------------------------------------------------------------------------------------------------------------------------------------------------------------------------------------------------------------------------------------------------------------------------------------------------------------------------------------------------------------------------------------------------------------------------------------------------------------------------------------------------------------------------------------------------------------------------------------------------------------------------------------------------------------------------------------------------------------------------------------------------------------------------------------------------------------------------------------------------------------------------------------------------------------------------------------------------------------------------------------------------------------------------------------------------------------------------------------------------------------------------------------------------------------------------------------------------------------------------------------------------------------------------------------------------------------|
| CrSMP2             | AGGTGGTGGGGCAATTTCGTGGAACCTGATGTCCCTATGAATTCCTGGTATGGCTCTCGAACCCAGATGCC<br>ATAACCATGGAGAGGCACTGGAAGCGTTCGGCGGTGGCTGGAGCGGGTGATAAGCCTGTGGACCAAGCGA<br>CGCGCTGCTATACAAGCTGCTGAAATGAGAGCCACCGAAAGAATGAGACAGCCTGGTGGGTGGGTGGGTG<br>CGAGGGCCCAATCAGCTGCCACTCACAACACTCGCACTCCCTCTTACTTTTATAAAACCACTTTGTCTCAT<br>GTCTTGGCGGATGCTAAGGAGAAGTTGCCAACGGACAAGCATGTAACGCGTGAGGATGCAGAGGGTGTCTAT<br>TGCTGCCGAGCTTAGAAAACAAACCCGACATGAAAACCAACCCCTGCCGGGGTGTCTGCATCCGTAGCCGCTG<br>CCGCCCCATTAAATCAAAACGCGTACCTTACAATAATATTATAA<br>ATGAGTCAAGAGCAGCCTCGGAGAGAGGAAGCCATCAAATATGGAGATGTGTTCAATGTGAAAAGAGAGCT<br>TGGAAGCAAAGCAGTGGCACCCTGTCAGCAGCAGCATGATGCAGAAAGCAGAGACTGCTATGATTGGGAAGA<br>CCGAAAAGGGTGGTGTCTGTGCAACCATGCAAGCTGCGGCATTGAAAAATGAGAGAGATGGCGTTGTGGGA<br>CATAATGATATCACTGAAGTTGTTGCACAGAGTGGTGTCTAGTGTAACTGAATCTGATCTTCCAGGGAGGCA<br>AGTTATTTTCGGAGTCAGTTGGAGGACAGGTTGTTTACACACTAGAGGAAAAGGAACATTTGTAAAT<br>TAGTTGAGGTGGTGGAGCAATTTGGGCAAAAGGTTGCATCGAATACGACGATGCCATCTTCTCTTGTCTCAA<br>GACTTGGGCTCAAGAGTTGGTGGTGGGATCACCATAGGTGAAGCATTGGAGGCGACGGTTTTTGACGGCGGG<br>AAAGAAGGCGGTGGAATGGAGCGATGCGGCGGCGATTCAAGCAGCGGAAGTGAGAGCCACCGGACGTACCA<br>ACATTTGTTCCCGGAGGTGTTGCTGCGGCGGCACAATCAGCAGCCACCTGAATGCTCGAACTACAAAGGAC<br>GAGGACAAGACCAAACTCGCAGATGTTTTGTCTGGATGCGACTTCGAAATTACCATCAGACAGACCAGCGAC<br>GAGCGGAGATGCTGAAGGGGTAACGGGTGCAGAAATGAGAAATGATCCTAACCTCACTACTCATCCAGGGG<br>CGTGTCCGCATCCGTGCTGCTGCTAGGCTTAACCAAAACCAATAATAACTAA<br>ATGAGTCAAGAGCAGCAAGGCACCCCAACCCGCCCCAAGATCCCATCAAATACCGTGACGTTTTTCGATGT<br>CTCCGGCGACCTCGCAAAGAAGCCCGTTGCACCCGAAGACGCCGCCATGATGCAGAGCGCCGAGACCCGTG<br>TCCTCGGCCAGACCAAGCCGGGGGAGCAGCTTCCGCCATGCAATCCGCCGCCACTCGGAACGAGCAGGCC<br>GGCGTTGTCTCGGTACCCGAGATGTCAGTGTACCCGGCAGCCGTGGTGTACCCGTCTCGGAGACTCAAGT<br>TCCCGAAGACGCATAATTTACGGGAATCAGCTCGGTGGACAGGTTGTGGGACAGTGTGTCGCGCATCCGG<br>TTCAGGCGGGACGAGCCGGTGGGTCCGAGACAGTGCAGTAACCATAGGGGAGGCGCTGGAGGCGACGGCG<br>CAGACGGCGGGTGAGAAGCCGGTGGATAAAGAGTGACGCGTCCGGCATAACGGCGGGGAGGTGAGAGCGAC<br>GGGCAGTAATGTTATAACGCCGGGAGGGCTTGCTTCTATGGTCAATCGGCGGCGGCTTCAATGCTGAAT<br>GCAACCGTGACCAGGAGAAGGTCAAGCTCGCCGATGTATTGACGGGGGCCACCGCGAAGTTGCCCGGGAC<br>AAGGCGGCGACAATTGAAGATGCTGAAGGAGTGGCGTGTCTGAGGTGAGGAACAACCCAGATGCGACGGC<br>CACTCCTGTTGGCGTGGCAGCCTCTGTGGTGCAGCTGCTAGGCTCAATGAAATGTTAATGTGTGA<br>ATGTTTACAACCACTATTTTGAAGTTTCTTCAATCTCTTTTCGATCAGAAACAATGAGTCATGGCCAGCC<br>CAAGAGACCCCAAGCAGAGGATTTCTTCTACTGTGAACCCATCAAATACGGCGACGTTTTTCAAAGTTACCG<br>GCGAGTTGGCGTCCAAGCCGATTTTACCACAGGAAGCCGCCCATGAAAGCCGCCGAGGCTGGCGTCTTA<br>GGGCGCCCGCAGAAAGGAAGCCAGCCGTAGTCATGCAGGACGCTGCGGCAATCAACCAGGCGTGGCGTGC<br>CGTTGACGGCAACGGGGTCCCATCAAGAAGGAAGACGTTAGTGTAACTGAAACAACAACCGCTGGCAACC<br>GTATCATAACAGAAATCTGTGGTGCCAGGTCTCTCGGAAGCGTGTGGACACTCAGCGCCTGTGGTCTCCC<br>ACGGATTTGGGTTCTGCAAGTTATAGATGGCGACCCGATAACTATTGGAGAAGCTCTGGAAGCAGTGGCCAT<br>AGCGGTTGGGGATAAAACCGGTGAACCAAAACGACGCCGCTGCGATCAGTGCCGCGGAGATTAGGGCGACCG<br>GCGAGAAGAACGTAAGGGCCGGTGGAGTGGGGGCATCGGCACAATCGGCAGCCACTCTCAACAGCCACGTC<br>ATGCGAGTCCAAGATATAGCAAAACTTCTGTATATATTAACGGATGCGACGGATAGCTGGCCATGGATAAA<br>GGCGGTGACGCAAGAAGATGCTGAGGCGGTGTATACAGCGGAGATGCGGTTTCCATGGCGGGGGGATGCAA<br>CGGACGTGATTTCTGAACCCGGTGGAGTGGCCGCATCCATGGCCACTGCAGCAAAAGCTGAATGAAGAAAAA<br>TGA |
|                    | ATGGCTGAAGAGAAACACCACCACCACCACCCTCTTCCACCACAACAAGGACGAGGATAAGCCTATAGA<br>AACTGAGAGTGGTTACAACAAGACTTCAAATACACTAGTAATGAACCTTCCGTTGGCTATGACTCTGGTT<br>ACAACAAGCCATCGTATGAGTCTTCTGGTGTATGCCTATGAACTGGTTATTAACAAAACATCATATGACACT<br>TCTGGTGGTGCCTATGAAACTGGTTACAATAAAACATCATATGATTCTTCTGGTGGTACCTATGAAACTGG<br>TTACAACAAGAGCTTATTTCCACTGATGAGCCTTCTGCTGGCTATGGTGGTGGTAGATACCTCTGACACCA<br>CTGGTGGTGCCTACACCAAAAAAACCGGTGAATATGCTGCCGGTGGTGGCTATGGCGATGATAGTATCGA<br>CGTGATGATGTTGACTATAAGAAGGAGGAGAAGCACCACAGCATCTTGAACACCTTGGTGAATGAGTGC<br>TGCAGCAGCTGGTGTCTATGCCCTTCATGAGAAGCACAAGTCAGAGAAAGACCCAGAGCATGGTGCACAGGC<br>ACAAGATAGAAGAGGAGGTTGACGAGCAGCGCTGCAGTGGGAGCTGGTGGCTTTGCTTTTCTGATGACATCAT<br>GAGAAAAAGGAAGCAAGGAACAAGATGAGGAAGCAGATGGAAAGAGCACCACCACCTGTTTGGCTGA<br>ATGGCTGAGGAGAAACACCATCATCACCACCATCACTTTTACCATCACAAGAATGAAGAACAACTGTTGA<br>AACTACCGTCTACTCCGAAACCACATTTGATGTTGCTGGAATGTGGATGACTATAAAAAGGAAGAGAAGC<br>ACCACAAGATCTAGAACACCTTGGTGAATTTGGGAGCAGCTGCTGCTGGTCTTATGCTTTGATGAGAAG<br>CACAAGGCAGGTAAGATCCAGAGCATGCCATAGGCACAAGATAGAGGAGGAGATTGCAGCTGTAGCTGC<br>GGTTGGGGCTGGTGGGTTTGCAATTCATGAGCATCATGAGAAGAAAGAGCCAAAAACAATATGAGGAAA<br>CACATGAAAAGAAGCATCATCACCATCTTTTTGGTTGA<br>ATGGCTGAGGAGAAGCACCACCACCTCTTCCACCACCACAAGATGAGGATAAGCCTGGCTATGTTGATGA<br>GGTTGATTATAAAAAGGAAGAGAACACCACAAGCATCTTGAACCTTGGGGAAGTGGTGGCTGCAGCTG<br>CTGGTGTCTTATGCTTTGCAATGAGAAGCATAAGGCTAAGAAAGAGCCAGAACATGCTCACAAGCACAAGATA<br>GAAGAGGAGATTGCGGCAGCAACTGCTGTTGGAGCTGGTGGTTTTGTCTTCCATGAACACCATGAGAAAAA<br>AGAAGCTAAGAAGGAAGATGAGGAAGCTCATGGAAAGAAGCACCATCATCTGTTTGGCTGA                                                                                                                                                                                                                                                                                                                                                                                                                                                                                                                                                                                                                                                                                                                                                                                                                                                                                                                                                                                                                                                                                                                                                                                                                                                                                                                                                                                                                                                                                                                                                                                                                                              |
| <b>Genomic DNA</b> |                                                                                                                                                                                                                                                                                                                                                                                                                                                                                                                                                                                                                                                                                                                                                                                                                                                                                                                                                                                                                                                                                                                                                                                                                                                                                                                                                                                                                                                                                                                                                                                                                                                                                                                                                                                                                                                                                                                                                                                                                                                                                                                                                                                                                                                                                                                                                                                                                                                                                                                                                                                                                                                                                                                                                                                                                                                                                                                                                                                                                                                                                                                                                                                                                       |
| CrASR1             | ATGCAGGGAGCAAAGAAAGCAGGAGAATCCGCTAAGGAAACTGTTGCCAACTTGGGTGCTTCTGCCAAGTC<br>TGGCATGGAGAAGACCAAGGCCACCGTCCAGGAGAAGGTATACCTTATTATTCAAATTTTAAATATGTTCAA<br>AATTATTTTTTTAATGATATAATAATAAAATTTTAGTTTAAATATAGTTTTGTGTTGATTTTTTCATAATA<br>ATTTATTTTTGAAGTTATATTTGTTGATAGTATAAAAAATTAATTTATTATATTAATGACACACA<br>TTATATATTATTATGGTAAAATTAATAATAGAGTTTTTGAATGAACTTTTTTATTATCATTGTTTATAAAA<br>ATATCTTCAGGCAGCTAGTCTAGTGGGTTTATAATACATTTTATAATGAGAACAAAGCTATTTAACAC<br>CGAAACGTTGGTCAATGTCCATGATGCTAATTAGAGTAATTCAGTTATCAGCCTTTTCAATCAACACATATG<br>TCATCATATATATATATATATATATATATATATATATATATATATATTTATCAAAATTTAACGATGAAAGCTTTGGTT<br>TAGAAAAAGTTTTTGGAGGTGCAAGTGATGGGTACATCATTTGTGCTGTGAGTGTGTGTTGCTTACTCTG<br>ATTCTATGTATATAGCTAATAAATGTGTTTGGGTTTAAACAGACAGAGAGGATGAGGGCAGCTGATCCTTT                                                                                                                                                                                                                                                                                                                                                                                                                                                                                                                                                                                                                                                                                                                                                                                                                                                                                                                                                                                                                                                                                                                                                                                                                                                                                                                                                                                                                                                                                                                                                                                                                                                                                                                                                                                                                                                                                                                                                                                                                                                                                                                                                                                                                                                                                                                                                                                                                                             |
|                    |                                                                                                                                                                                                                                                                                                                                                                                                                                                                                                                                                                                                                                                                                                                                                                                                                                                                                                                                                                                                                                                                                                                                                                                                                                                                                                                                                                                                                                                                                                                                                                                                                                                                                                                                                                                                                                                                                                                                                                                                                                                                                                                                                                                                                                                                                                                                                                                                                                                                                                                                                                                                                                                                                                                                                                                                                                                                                                                                                                                                                                                                                                                                                                                                                       |
| CrASR2             |                                                                                                                                                                                                                                                                                                                                                                                                                                                                                                                                                                                                                                                                                                                                                                                                                                                                                                                                                                                                                                                                                                                                                                                                                                                                                                                                                                                                                                                                                                                                                                                                                                                                                                                                                                                                                                                                                                                                                                                                                                                                                                                                                                                                                                                                                                                                                                                                                                                                                                                                                                                                                                                                                                                                                                                                                                                                                                                                                                                                                                                                                                                                                                                                                       |
|                    |                                                                                                                                                                                                                                                                                                                                                                                                                                                                                                                                                                                                                                                                                                                                                                                                                                                                                                                                                                                                                                                                                                                                                                                                                                                                                                                                                                                                                                                                                                                                                                                                                                                                                                                                                                                                                                                                                                                                                                                                                                                                                                                                                                                                                                                                                                                                                                                                                                                                                                                                                                                                                                                                                                                                                                                                                                                                                                                                                                                                                                                                                                                                                                                                                       |
| CrASR3             |                                                                                                                                                                                                                                                                                                                                                                                                                                                                                                                                                                                                                                                                                                                                                                                                                                                                                                                                                                                                                                                                                                                                                                                                                                                                                                                                                                                                                                                                                                                                                                                                                                                                                                                                                                                                                                                                                                                                                                                                                                                                                                                                                                                                                                                                                                                                                                                                                                                                                                                                                                                                                                                                                                                                                                                                                                                                                                                                                                                                                                                                                                                                                                                                                       |
|                    |                                                                                                                                                                                                                                                                                                                                                                                                                                                                                                                                                                                                                                                                                                                                                                                                                                                                                                                                                                                                                                                                                                                                                                                                                                                                                                                                                                                                                                                                                                                                                                                                                                                                                                                                                                                                                                                                                                                                                                                                                                                                                                                                                                                                                                                                                                                                                                                                                                                                                                                                                                                                                                                                                                                                                                                                                                                                                                                                                                                                                                                                                                                                                                                                                       |
| CrLEA1-1           |                                                                                                                                                                                                                                                                                                                                                                                                                                                                                                                                                                                                                                                                                                                                                                                                                                                                                                                                                                                                                                                                                                                                                                                                                                                                                                                                                                                                                                                                                                                                                                                                                                                                                                                                                                                                                                                                                                                                                                                                                                                                                                                                                                                                                                                                                                                                                                                                                                                                                                                                                                                                                                                                                                                                                                                                                                                                                                                                                                                                                                                                                                                                                                                                                       |

|          |                                                                                                                                                                                                                                                                                                                                                                                                                                                                                                                                                                                                                                                                                                                                                                                                                                                                                                                                                                                                                                                                                                                                                                                                                                                                                                                                                                                                                                                                                                                                                                                                                                                                                                                                                                                                                                                                                                                                                                                                                                                                                                                                                                                                                                                                                                                                    |
|----------|------------------------------------------------------------------------------------------------------------------------------------------------------------------------------------------------------------------------------------------------------------------------------------------------------------------------------------------------------------------------------------------------------------------------------------------------------------------------------------------------------------------------------------------------------------------------------------------------------------------------------------------------------------------------------------------------------------------------------------------------------------------------------------------------------------------------------------------------------------------------------------------------------------------------------------------------------------------------------------------------------------------------------------------------------------------------------------------------------------------------------------------------------------------------------------------------------------------------------------------------------------------------------------------------------------------------------------------------------------------------------------------------------------------------------------------------------------------------------------------------------------------------------------------------------------------------------------------------------------------------------------------------------------------------------------------------------------------------------------------------------------------------------------------------------------------------------------------------------------------------------------------------------------------------------------------------------------------------------------------------------------------------------------------------------------------------------------------------------------------------------------------------------------------------------------------------------------------------------------------------------------------------------------------------------------------------------------|
| CrLEA1-2 | <p>GCAAAAGGATTTGGCAACTCAGAAGAAAGAGGAGAAGATCAACCAGGCGGAGCTGGACAAACAGGCCGCGC<br/>GTGAGCACAAACGCGCGCGCAAGCAGTCAAGCCAGGCGCGGCACATGGGACAGGGCCACCACACCCGGA<br/>ACTGGGACCGGAACCGCAGTACTCCACCACAGGACAACACGGGAGCCCATCAGACGTC<br/>AGCGATGCCTGGCCATGGAAGTGGGAGCCACAGGCCATGTTACTGAAGGAGTCGTGGGCTCACACCCCA<br/>TTGGAACCAATAGAGACCCGATGGGACTGCTACGGCCCATAAATACCCGGGCGGGGGGAATCCAAATGAC<br/>TATGGGTATGGGACTGGGGTACTTACACTTAA</p> <p>ATGCAAGCAGCGAAGCAAGCGGTTGAGAACATTAAGGAAACCGCAGCCAACATTGGCGCCTCTGCTAAGTC<br/>TGGCTTGGAGAAGACCAAGCCAGTATCCAAGAGAAGGTTTCCCTTCCCTTTTCATTTTCAAATTTAAA<br/>ATTATTCATATATTTTCTTTTCTTCTTCTGCTTAATTCATTTTGTCTTCTTATCAATTTCCATTTCATC<br/>AACATTGTTGTTTCATAGCCTTACTTAAAGTTGTTATTTTGTATATTTATAAGATCTATTGTCATAATATC<br/>ATATTATAGAAGAAATCGTTATAATATCATTGATGATTCTTAAATAGAACAATCATAGTTTCAATTAATTT<br/>TATATTAGAGATTAATTTGAATGCTAATAGGTCAATCAGTCTAATAAATTTGAAAGATTGATGACTTCTGTT<br/>CTTTGGGCGCCATTGATTACTGCAATATTTTGAAGTCAATGAATGTGATTGCAATTTGGGCTCAACAGAC<br/>TGAGAAGATGAGTGCCCATGATGAAATTCAAAAGGAGATCGCAACCCGAAAGAAAGAGAGGATCAACC<br/>AGGCTGAGATAGAGAAACAACAGGCAGTGAAGTACAACGCGCGCCCAACAATCTGCCATTGGCTGGGCAC<br/>ATGAGTCAGGCCCACTATACTAATCTGGGCGAGGACTGAAACTGCCACAGATCTCACAATTGGGTCAG<br/>GCCTGAGACTGATGCTACTTACTCCACTACTGGGCGCGGCTGAGATTCTACGACATATTTTACCCTG<br/>GGCTTGGAAATTGAGACCGCCATATTCCTGCCACTGGGTCGGGCGCTGACACTGCAACACACCCCATTTGGT<br/>GAGTATGCACAACCTATGGGGATAACACCTATGGGCGTGGTAGGATCAAAATCCGTCTGGGACTAACACTGG<br/>CGTAGATAGTACTGCTCCTATGAGTGGACATAATTTCAAGTTGA</p> <p>ATGCAATCTTCAAAGGAGAAGCTGCAAAACGTGGCCGCTGCTGCCAAGGAGCAGCTGCACATTTATAAAGC<br/>CAAAATAGACGAAAAGGTCGTCTTTTCATGAACCTATCCATCTCTATACGATTTTGAAGTCTCAAATTA<br/>TTTGATGTTTGTGTCATGAATTTGACGTGGTGGAGTTAAATCATTTTATCTTCAATTTATCGTAGGTAC<br/>TTTCTAAATGATTTCAAGAAATTTTGGCAATTCACCTTTGGATTAGTTCCGGTATAAATCTATCGGTT<br/>TTTTTTTTAGAAGATCGTTCAAACGCAAAAGTATTTGAAGTTGAAGAAATGTTACTAACAGATATTTTTTA<br/>AAACACGTTGTTGAATTCATTTTGTGATGATTAATTTTTTAAAGTAAATTTATTTAAAGTTAATAGTAGT<br/>CTTACTGGGTTAAATGCTGCGAGGACAGAGAGCAACGGCAAGAACCGAGGAGGAGAAAGCAATAGTCCATG<br/>AGCGTGCAAGGCAAGGAAGCTAAAGCAAGATGGAGCTGCATGAAGCTAAAGCCAGGCATGCCGCGCAA<br/>AAGCTAAGCAACAACAATCACATTATTTATGGTCTCCACGAGCAGGAGTCCCGTAGTTGGGGCTCAACA<br/>ACAACCACCCTTGGTAGGAAATCAGACTCAGTACCAGCAAGGGCACCCTCACTTGGAGCAGTTCCCATGT<br/>CTGGAACCACTTATCCATCTTATCCACTGGGAGGAAACCTTCCAGCAGTAAGCATATATGA</p> |
|          | <p>ATGCATGCTAAGACTGACTCAGAGGTGACAAGCTTGGATGCGTCTGCCACACACGTCCTCGGAGAGC<br/>GGTGTATTACGTTCAAAGTCCATCTCAGATGGGAGAAAACGACGACGTCGTTGCACTCTACTCCTGTGC<br/>TCAGCCCCATGGGATCCCCCTCCTCACTCTCACTCTCTTCAAGTCGATTTTCCGGTTCACGAAAGATGAAC<br/>CATCATCGCAACAACAAGACTTGGAAAGACATTGACGTCATCGAAGAAGAAGGCCCTTCTTCAATCCGAAGA<br/>ACGTGACCGTACTCTCTCTAGAAGATTCTATTTCTCGCTTTTGTATTGCTTCTCTCTCTCTCTCTCTCT<br/>TCTTTTCCCTTATACTATGGGGTGTAGCAGGCCCATGAAGCCAAAATAGTCATCAAGTACTTTAAACT<br/>TAATTTCACTTTCTATAAATCTTCCCTCTCCTTCAATTCATTCACAAATTTTCCATGTGCCTTTGCG<br/>CAGAGCATTAATTTGATCATCTCAGAGTTCAAGCTGGTCTGATTCCACCGGAGTCGCCACCGACATGAT<br/>CACCATGAATTTCCACCCTCAATTTCACTATCGCAACACCGGCACATTTCTTGGGTTCACTGTCACTTCAA<br/>CACCATTGGATCTCTCCTATTCAAGAAATCGTAATTTGCCACCGGCAATGTAAGATTCACTATATATATATA<br/>TATATATATATATATATATATATATATATATATATATATATATATATATATATATATATATATATATAT<br/>AGTTCTTGTCTCTTTATAAACAATAATGTGATGGCTGAATTTGATTATGCAGATGAACAAATTTTATCAGT<br/>CAAGGAAGAGTCAGAGATTGGTGAAGTGTGAGTGTGAGTGTGAGGAAACAAGATCCCGTTATGGAGTGGTGCT<br/>AGCTTGAGTAGTTTCAACAGGTATGCCAACAGTGCCTGTGCCTTTGAAATTTAGCTTTGTGATTGATCCAG<br/>AGCTTACGTGCTTGAAGATTTGGTGAAGCCAAAGTACTATAAGAGGGTTGACTGTTCCATCACTTTGGATC<br/>CGAAGAAGATCACTCTTCCACTTTCACTCAAGAAGTCTTGACATACGATTGA</p>                                                                                                                                                                                                                                                                                                                                                                                                                                                                                                                                                                                                                                                                                                                                                                                                                                                                                                                                                                                                                                                                                                   |
| CrLEA1-3 | <p>ATGGCGGATGGACCCCGGCGACACCGCGCCACGAAGCCAAAGGAGGCCACCGCTGACGCTGACGCTAC<br/>CAACCTGGCCTCCTGCGTGGTGGCCACCATCTTCTAATCTTCATCATCATCGTCATCTCTATTGCTACT<br/>ACACCGTCTTCAAGCCACAGGACCCCAAGATCGCGCTCAGCGCGTTCAGTCCCATCATTTCTCCGTCGTT<br/>AACGGCACCGTCAACTTCACTTCTCCAGTATGCTTCCGTCAAGAACCTTAACCGCGCGCTTTCTCTCA<br/>CTATGACAGCTCCCTCAGTCTCTACTCGGCGAGCCAGGTTCGGGTTCACTGTTCCGCGCGGAGAG<br/>TCGACGCGGTCGGGACAGTACATGGCTGCCACCTTCTCCGTTCAGTCTTCCCTGTGCGCGCCAGCC<br/>AGATTGGGGCCACACTGGCCAATGGCGATGGTGTGGGTTAACTATGGGCTTAGGGTGGAGCCACGAT<br/>GGAGATCGAGTCCAAGTTGGAGATGGCGGGGCGGTCAGGGTTTTCAGCTTCTTACGCCATCACGTTTACG<br/>CCAAAGCCGTTGCGAGGTTGCAATTTGCCGTTACCAGATGATGTTGTTGTTTATGTTTCAATGTTGCTAA</p> <p>ATGGCTCAGAGTCCAGAGCAGGTTAAGCCCTTAGCTCCATTATATCATCAAATTTACCTCAGCAGACAAGA<br/>AGATCAAAACATCTCCGAAAGAAAATCATTCGCATAAGAAAGTTCGTCCGTTGCTGCGGCTGTGTCACTG<br/>CCCTTGTGTTTGTATTTGTAGTCATAATATTAGTCTTGGGCTTCAGGTTTCAATGTGAAAGAACCTGAA<br/>GTAAGGATGAACAGGGTTATCCTTCTCAATAGAACTTTAGCTAACGGTGCATCAATGACGTTACACTTCT<br/>TGCTGATATCTCTTTGAAGAATTCAAACGCTTTCACCTTCAGGTTTGGATACACCAACACCACTGTTTACT<br/>ATGATGGCACGGAATAGGTGAGGGAACATCTCCACCGGTAAGGCCAAGGCAAGGAAGACAATAAGGTTTC<br/>AACGTGACGATGGAATTTATGGCAAGAAGCTTTTGGCTGTCCCAAGCTCGGAGAGTGACATCAGAGATGA<br/>TCAAGCTTTGAATATCAGCAGCTATACCATGGTAGATGGTAAGGTCAAAATATACAATCTGTTTATGAAGA<br/>AGGTTGTGGTTGAATTTGAATTTGATCAATTTCAATACAACATCACCACTGGTTTACCTCCTCAAACGGTGGC<br/>AATTGCCCTCGGACTCGTTGATCTTTAG</p>                                                                                                                                                                                                                                                                                                                                                                                                                                                                                                                                                                                                                                                                                                                                                                                                                                                                                                   |
|          | <p>ATGGCCACCAATATGCCTAAATTCAGCGAAAACCTGGGAATGGGTGCAGATGGCCGACCAACCCCATAGT<br/>CTGGCTAATAGCATTATTCGACCATCATAGCCGTAGCAGTGGTAGTTGCAAGGATTCAGTGTGTTATAG<br/>GTTACATAGTGATCCACCCAGGGTTCCTATCATCAGTGTACAGATGCTCATTTAGATTTTCTGAGAAAT<br/>GATTATGCTGGTCGACTCCAACCCAAATCAGAATTGTTGTGACTGCAAGAATGGGAATGCCAAGGCTCA<br/>TGCAACATTTTCTAAGATGACTTTCAACATTAGCTACCAAGGCCAAGATATAGCTGTGCTGTTGTCAGACC<br/>CATTTGAGGTGCCCAAGAACAGTTCCAAAGAGCTCCATTATGTTGTACAAATCACTCCATACCAATTAAT<br/>CCTGATCAGATGGAGGAAGTGAATAATGATGGAACAGAAATGAGATTGAGTTTGAATTTCAAAGGAGGCTGC<br/>AAGGACACAGTGGAGGGTAGGGCTTTAGGCTCTGTTAAATCTTGTGTCATCTGGATTGTGACCTCAAGT<br/>TTCGCCCCCTGAATGGGTCTTACGTACCCTGCGATTGCACCTCCAAATCAAATGA</p>                                                                                                                                                                                                                                                                                                                                                                                                                                                                                                                                                                                                                                                                                                                                                                                                                                                                                                                                                                                                                                                                                                                                                                                                                                                                                                                                                                                                                                                                                                                                                                                                                                              |
| CrLEA2-1 | <p>ATGATGAGTGGAGAGAGAAGCTAGTTAGAGTTTTCAGAGGAGGGTGAAGCAACAAGTAGGCAGCAGCAACT</p>                                                                                                                                                                                                                                                                                                                                                                                                                                                                                                                                                                                                                                                                                                                                                                                                                                                                                                                                                                                                                                                                                                                                                                                                                                                                                                                                                                                                                                                                                                                                                                                                                                                                                                                                                                                                                                                                                                                                                                                                                                                                                                                                                                                                                                                     |
| CrLEA2-2 |                                                                                                                                                                                                                                                                                                                                                                                                                                                                                                                                                                                                                                                                                                                                                                                                                                                                                                                                                                                                                                                                                                                                                                                                                                                                                                                                                                                                                                                                                                                                                                                                                                                                                                                                                                                                                                                                                                                                                                                                                                                                                                                                                                                                                                                                                                                                    |
| CrLEA2-3 |                                                                                                                                                                                                                                                                                                                                                                                                                                                                                                                                                                                                                                                                                                                                                                                                                                                                                                                                                                                                                                                                                                                                                                                                                                                                                                                                                                                                                                                                                                                                                                                                                                                                                                                                                                                                                                                                                                                                                                                                                                                                                                                                                                                                                                                                                                                                    |
| CrLEA2-4 |                                                                                                                                                                                                                                                                                                                                                                                                                                                                                                                                                                                                                                                                                                                                                                                                                                                                                                                                                                                                                                                                                                                                                                                                                                                                                                                                                                                                                                                                                                                                                                                                                                                                                                                                                                                                                                                                                                                                                                                                                                                                                                                                                                                                                                                                                                                                    |
| CrLEA2-5 |                                                                                                                                                                                                                                                                                                                                                                                                                                                                                                                                                                                                                                                                                                                                                                                                                                                                                                                                                                                                                                                                                                                                                                                                                                                                                                                                                                                                                                                                                                                                                                                                                                                                                                                                                                                                                                                                                                                                                                                                                                                                                                                                                                                                                                                                                                                                    |

GTACTACGCGGCAACGCCACCATCGTCTCATTCTCTCACCTGTAAAGGGTGTCTGCTGCTGCCTCTTCTCTC  
TCTTCTCTTTCTCTCGGTCTCTTAGTCTCTAGCAGCATGCTACTCATCGTGTGGTTCGTTAAGCCAGGAAC  
CCTCACTTGGACCTTTCCCAAGTGGGCTTCAGTATATGCCATCAGGCCCAACCCCAACGATCCAGCAAC  
AGCCAGTCTCTACCTTATCATCAGGTTGGTGTGTCTGGCTGGTGAATCCCAACAGGGTTAGGATCAGTACG  
GGGAGTCCAGGTTAAGCCTCATGTTCCGCGGTGTGACGTTGGGGCGGGCCTCGGTGCCAGCTTTCTTCCAG  
CGTGCTCACAGCGTGACGGAGGTGGTGGCCACCGTCCGCCGTGATGGGGTCAACTTATCTGAGGCTGATGC  
TGCTGACTTCCACGAGACGCTTTGTGTAATGACCGGCTGAGCTTGGGCTTGTGGCCATGTTGCCGCCA  
AGATTCGCCCTCTTCAACCTCTATTCTCTCTCTTCCAGTAATCAACTTCTCTCTCTCTCTCTTCTGAATTG  
TTTTCATTTTTGTCCACTTTCGCCCTTACCTTTTTATTTTTCTCAATGGATAAATTATCTACTCTAACAAAT  
TTACAATTTAAAACCTTCATGACAAAAAAATATATAAGAAATACCATTTACATTTTAAATTAGGTTTAA  
TTATTTATAGACTTTAAAAATTTGTTTGGTTCAGCTTATGTTAAATTTTTTGAGATGATTTTAAAAATAAAC  
GGTTATTTTTTCAAATTAATTTGTTACTATAAATCTGAACCTTAATCGATTAAAGTCAAAACAGGTGCGGATGTT  
AACACGAACATCGGATACAACACGAAAATGATTATTCTAACATGGTTAAATGTTTGAATATAGAATATCGA  
AACACCATATATAGCCTTATAAAAAATATTATTAAGTTATATTTATTTTATTACATAAACATTTGATTTTTT  
TTTTATATAAAAAATCCGAAAAATGAAGTATATCTTAAAAAAAGTGATTTTATCTTCTTAACTAACAT  
GTTAAGTTTTTACTTTTTTATGATAATGAGTTTTTTTTAAATAGAGATATCTTTTTTAAATTTTTCTATATA  
ATTTTAAAGTTAACTTTTCTAACAAATTTAAAAAGTAAATATTTTAACTATATTAATATATATTCTATTIA  
TAATAATGTCAATTTTAAATATCTAACTATATATAGAGGTGTGAACCTTAAGTATTTAAATTAATAAAAAAA  
AATTTATATTTGAACATGTAGTTAAAAAAGTGTCTAAAAATATATAAAACAATAATATATAAAACAACA  
TACTTTAAAAATAAAGAGTATATAAAGAAGCTATGAACATGCAACCATGCAAGTGTAGACATTCCTTT  
CCGTGGACCAGCATATGAACCTTCTCACCTTAAATACAGAGTCTCCCTTAACTTTTACTTCTTCTCAGTG  
TCTTAATTTTAAAAAAAATATATATTTTATATCTCGTTTTATTTAAAAAATATTTCTTCAAGTTTCTTC  
AATTTTATATTTCAATTTTTTGTAAATAGTTTATGTAATTTTTAATTTCTCATTTTGTATTCAATTTTTAA  
TTTTAATCTTACCATATTTTTTTTATAATTTTGATCTTAGTTTTTAACTTTTTCTATCAAAATTTTTCTATA  
TTTAGTCTTAAAAAATGTAGTTTTAAACAGTTTGTATTTCTGAATTTTATTTATTTTATACTCTGCACC  
TTTAGAAGATCTTTTAGTTTTTAAAAAATGTTGACTTATATATTTTGATATATCTTAATATGTTAATTTTA  
TTTTATATATTTTTTTCATGTTTTTATGAAAAAATACTAAAAATATAATTAATCTTAATTAATTAATATA  
FACTAACATCTTTTAAAAATAAAAAATATAGTAAATGTAATTTTAAAGATTAATATATATTTATTTTAAAT  
AACATCATTATTTAATAAAAAAATTAACTCTAAAGTTTAAATTAATAACTTTTATAAAATAAAAAAATTT  
TAAAAAATGAACGAGACTAAATCTAGAATTAAGTAAAAATTAAGGATTAAATTTATTAACCTCTTA  
GTACATTAATTTGTGATGTTACGTGCATGATTAACTCTCCGCCCTTTCAAAACATAACCGTCCACCTTA  
ATTTCTCAATTCGATGGGATGCACATTTCTTCTTAAATAAATAAAAAATAAATCAAGCTTCTGCTGT  
ACTGCATCACCTGATCAGTCACATACATACACGTTCTCAGATTTCGGTTGGGTGCCCTTTCCACTTTTGTGTT  
TTTGGTTTGGTTGTCTAATTTATGGGCAGTTTGGTAGAAAGTTGAGAAGAATGATTTAATTAATTAAT  
TTTGATAGAATAAATGTGGTAAAAATGATTTTTTGTGTTTGATCAAAATTTATCTTCCAATTTCCCAAGTAA  
AATGCAATATACAAGATGATCAATTTTACAAATCTAGTTTTGAAATCTGACCTCCATTTCTATTATTA  
AGTTGAATTTTATCTCAAAAAACAAATAAAAAATACAAACGAAGTTTGGGACAGCAAAACCAAGGTTACAGG  
TTTTTAACAGTATAACAAACCTCTAAATCTTAAACCCCATAGATATAAGAAATGGGGTTTTTTTATTTAAG  
GAAACATTTGTTTACACATTTTCATTTAGGATATATTTGGATAGGATGAAAGAGAAAGATAAGATATGGCATA  
TAATTTGATAGAAAGAAAAAGATAAAAAAATACAAATATAGTATGATACAAATATTTATATATGTATGAA  
TATCATTTACTCTTTATCTTATTTCCCATTTATTTACCTTTTTATAGATTTTATTTTCTCACTCATATTGAGGT  
ATATAGTTTTAAGTCATATATTTTGAATTTAAAGTTATAAAGTTGTATTTTTATCAAACCTGCATGGG  
AGAGATCACTACTTTTCATCATACTATTTTAGTATTTCACTTTAATCATTAAGATTTTGAAGAGCTCAGTCTCA  
GAATCATATTTCTACAAAGCTTTTCGTTTACGCTCTTTATGCGTTTTCTCTATAATACCGTGTGAA  
TCTTCAAAATTTCTATTTAGCCTCACTTTTATGTACAAGATTTATTTTTTATTTTACCTATTTTGTAGTACT  
TCTCATTTTTTGGTCATTTCTATTTTCTTTAATGAAATCTTTAATTTTAGCAATGATTAATAAAAAAATAT  
TTACGTTCCAGCTATATTTGAAGGTAAAGTTGTTAAATTTTATTTAATAGATCCAACTACTTTTGTATACGA  
AACTCAATTTTTTTAAATTTTTTAAATTTTATATATCCCGTGTGTTTTTAAAAAATGTAATAATTTAA  
CTAATAGGCGGAGGAAAGTGAGAAAGATTCGGGCAAAATGACTAGAGAGGGTCTACTAGTATTTCTTTT  
TCCCATGTACGTTCCAGGAATGCAATTTTTTGGTATTCTGTTTTTTCAGGCAAGGTGGTGCAATATGTGTGTT  
ATGTGTTATAGATAAGGGTAGGTTTATTTTGAAGTGAAGCTCACAAATGTGCCAACACTGCTGCCATTA  
CAGGTGTCGGTGAATTTGTTTATAGTGATAAGTCCAAGAAAGCAATCTCTACTTATAAGCAGTGTGGATT  
GGAGGGATTGAATGTTTGA

ATGACCGAACCATCATCCAAACCCAAACGGAACCGGCGCAATTAACGGTGCTGCCACCACTACTAACGGCAA  
CCCTGGTCCCGTAAAGTCCCAACTCTACAACCCAAACCGTCAACTTTACCGACCACAATCCCACTACCACC  
GTCGTCACAACGCTCTCAACGAAACCTCTGCTGCTGCTGCTGCTTCTGGACCAATTTCTACCCCTCTCGCCGCT  
GCTCTCTCTCGCCGCAATTTGTCGGCGCGCGCACTGTAGCTACTGACCGCCCTACCGTCCCGAATTTCTCCGT  
CACAACCTCCGCATTGCGAAGATGAACCTCACAACCTCGAGCGACTCACCTCCCACTCAACACGCTCT  
TCAACCTCACACTCATCTCCAAGAATCCGAACAACCACTCGTCTTCTTCTACGATCCCTTACCGTCAAC  
GTCTTCTCTAACTCCGTCCCGCTCGGAACCGGTTCCTCAACGGCGGTTTACTTCTGGGAAGAACAACAGAC  
TAGTATTCCGACGGTGCTGTCGGGCTCCCAAGATCTGGACACGGAGTCTTGTACCAACGCTGAGATCGGGTC  
TGAAGAAGAAGGGTTTTCCCGTGGAGATTAGATGGACACTAAGTGAAGATGAAGATGGATTGGCTCAAG  
AGCAAGAAGGTCCGGATTAGAGTCACTGTGATGGAATCAAAGGCACCGTTCCCGCCGGTAAGACGCCGGC  
GGTTGCTTCCGTATCAACTCTGACTGTAAGTGCATCTTCAATCAAGATCTGGAAGTTCTCTTTCTAG  
ATGGAGAGCGGGTGTCGTCGCAGCTATCGCCGCCGCCACCAAGTAGATACTCTCTCTCAAGACCCATC  
TATACAGAACCATAGTAGCAAAGCATCCAATTATCCCGCAACTTGGACCCCGGCACATACGTTGTCCGG  
TTCCAAGGACCAAGTCTACCGTGTTCCACCGCGGAAAAATGCCAAATCGCGAGGCTCCATCGGAGCACT  
CCCCAAAAGAATACAAAGAGGACGCGTTGCTGGTGTGTACAGTGTTTTATTGCTGTTATAATTGTCATTTT  
GATCATTAATTGGAGGCATTTTGGTGGGCTTTTCTCTGTTGTACTTAAACCAAAAGACCCAAGGTTTTCGA  
TCCAACACTTTTAATGCTCTTAAGGGCACTCCCAACCCAAATACAACATCACTTTACAAGCCCAACATCCA  
AATTCATAAGTAGGCATTTGGTATCAAAGAAGAGGCCAGTTTCACTGTGCTTTAAGCGCGAAAGATATGC  
TTCAGGATCCTACCCAAGTTTTCTCATCAAACCCCTCATGATTCAACACCCCTTTGGCGTTACTTTAAAAGCCT  
CAAAAGCTGGTTTCCCTAAGGAGGTGGAGGAAAGCATCACAATCATAAACAAAGTGCATGTGCGATTCT  
TCATTAACCATTCACGTCCACGACGAAATGAAATGGGATTGTTCGCTAGTGGGACAAATGCAATTCGACGT  
TACGTGTACAGGTGACGTTGGATTCTTGGCCAAAACCCCTCGTGACTTTCTCAACAATGTCAAACATAAC  
GACACTGAC

|           |                                                                                                                                                                                                                                                                                                                                                                                                                                                                                                                                                                                                                                                                                                                                                                                                                                                                                                                                                                                                                                                                                                                                                                                                                                                                                               |
|-----------|-----------------------------------------------------------------------------------------------------------------------------------------------------------------------------------------------------------------------------------------------------------------------------------------------------------------------------------------------------------------------------------------------------------------------------------------------------------------------------------------------------------------------------------------------------------------------------------------------------------------------------------------------------------------------------------------------------------------------------------------------------------------------------------------------------------------------------------------------------------------------------------------------------------------------------------------------------------------------------------------------------------------------------------------------------------------------------------------------------------------------------------------------------------------------------------------------------------------------------------------------------------------------------------------------|
| CrLEA2-8  | ATGTCTCAAATCACAATAAAATCTCCAAAACACTGTGCTACCAAGCAAGGACTGAAAATTGAGAGGAACTA<br>CAAGAAACTCTTCTATGTTTTTTCAGCATTTTTTCACCTCAATCCTATTGTTAATACTTCTTATCTGGCTCA<br>TCCTTCAACCTTCCAAGCCTCAATTCTCCCTCAAACAAGTTGACATCTACCACTGAACTTGTCTAGGACCA<br>AACCTCAACTCCTCCATCCAACTCACTCTTCTATCCAAAGATCCAAACCAGAAAGTTGGTATTTTACTATGA<br>TGAATTTCAAGTTTATGCAACCTATAAGGGTCAGCAGATAACTGGTGACACCCCTGTGCCTCCCTTTTACC<br>AAGGACAAGAAGAGAATAATCTCTTAACAGCCTCTTTGGTAGGAAATGGGTTACCACTGGGCTCCTTCTCTT<br>GGTTATGAAGTGGGTCGTGATCAAAGTGTGGAAGACTAGTTTGAATGTCAAAGTTAATGGAAAGCTTCG<br>TTGGAAGGTGGCAACTTGGGTCTCTGGACGTTACAGGTTCAATGTTAATTGTGTTTCAATCATTGCTTTG<br>GACCTTCAGCTCCTCTCACTTCAAAGCAGGGAGCTCGGTGTTCTACCACAATTTAA<br>ATGAAAGCAGGATCTGGTAAAGGGAGAAAAGTTTGCCTGACAGTGACAGGTGTTGTGATTGCAATTGTAAT<br>GCTAATGGTGATAGTACATGACGGTGTCAAAGCCAAGCATCCTGTTACCACAGTGGACTCAGTGATGC<br>TGCAGGACTTCCACATGAGCTTGGATATAGCAAAACTAAAGGTAGATTTGAATGTGACCTGGACCTGGAT<br>GTCTCTGTGAAGAACCCAAATAAGGTGGGATTCAAGTACTCAGACAGCACCGCCACCTCAATTACAGAGG<br>GCAGCTGATAGGTGAAGTCCCAATCTCAGCTGGAGAGATTCTTCTGGTGAGACCAAGGATTCAACCTCA<br>CCCTCACCATTATGGCCGACCGTTTGATCTCCAATGCCAGCTTTACTCTGATTTACATCTGGTACATTG<br>CCCTTAAACACTTTTCAATAGGATTTCTGGCAAAGTCAGCATCTTAGGCTTTTATAGCTCATGTTGCTTTC<br>CTCCACATCTGTGATTTTGCGGTTAATCTTTCCAATAGAACAGTTGGAACCAAGAGTGCCAATACAAGA |
|           | CGAACTTTGA                                                                                                                                                                                                                                                                                                                                                                                                                                                                                                                                                                                                                                                                                                                                                                                                                                                                                                                                                                                                                                                                                                                                                                                                                                                                                    |
| CrLEA2-9  | ATGATCTTATCGACACGTTTGGAGCCGTTGATTAGTGGCAACAGAGAGGTACAGTGCGACACGTATCATCA<br>CGTGTGCGCATGGGACGAGACGTGTGGTATACGTGTCTGGAGCAGGAACCTCGTATGGACATAGTAGGACA<br>GTGTTTGGTTTCCCTCTTGCTATAAATGTTGTGACTTTCGCAATGGCAGCGATAAGTGTATCGATAATT<br>TGAGATTGAAAAATGTCACAGTTGCTGAATAAAGCCAAGGACTTCGTGTCCGAGAGAATCAACAACGTGGC<br>CAAGCCTGAGGCGAGTGTCAACGACGTGACTTCAAGCGCGTGAGCAGAGATAGCATCGAATACTTGGCCA<br>AGGTCTCTGTTCGCAATCCTTATTCAACTCCAATACCAATCTGTGAGATCAAGTACTCTTCAAAGCGCG<br>TCAAGGTACTCTCCACTCAATTTCTTCAATTAATCTGATTATTAATAAATGAAAAATGTTTCTTGAATAA<br>CAAATTATTTTCTTTTTTATCTTGTATCTATTTTTTAGAGGTCTGTGTACGAATAAGATAAAAAATAAT<br>TTTATGTAATATCATATTATATGGTGTGCTAGTTTGTGTTCTCTAATGAATATTAAAAAAGCTACGAA<br>AAAAATAGGCCAAAATTAAGAGATACTGAATTTTTATATTAATCAAGCAACGTATAGATACATAAAATAA<br>AATAATAATATATACTTGTCTAATCACATCTATATATTTAAAAATTTAATTTAATCTACTGTTGCTATAA<br>AAATTTTAATCACATAAAATAATAATCTGTTTAAAGAAATGTTTGTGTAATATTCTTTGGTTTAAATA<br>ACTCAATACATTTTCAAAATTTGATGTTATTTGTGTTTGGTAGGGAGATAGCATCAGGCAGAATGCCAGAC<br>CCAGGATCGCTGAAGGCAAGGATACGACAATGGTGGAGGTACCACTGAAGGTGCCATATAGCATATTAAT<br>GAGTTTAGCTAAGGATATTGGAGCTGATTGGGATATTGACTACCAACTGGATCTGGGTCTCGTTATTGACC<br>TTCTTGCCATTGGCAATTTCAACATTCCTCTCTCTCACAACGGAGAGGTCAAGCTACCAACCCCTCTCTACT<br>ATGTTTCGCTTAG                                                 |
|           | ATGGCAGAGAGAGAGCAGGTTAGACCCCTTAGCTCCATCCATAGATCGTCCAAGCAGCGACGAGGACGACAC<br>CACTCTACACCGCACATCACCTGCTCGTACAAAATTCATCAAATGGTGGGCTTGTCCATTAGCTTTCTTAC<br>TTCTTCTAGCAATTATAATCATAGTTTTAATATTACCGTGTTCATGTCAAGGACCCCTGATATCAGAATG<br>AACGGTGTCAAATCACAAGCTAGAACTTGTCAACACCTTAACCCCTAAACCTGGGGCTAACATGTCCTT<br>AATTGCAGATGTATCGGTGAAAAACCCCTAACGTTGCATCCTTTAGGTATAGTAACACCAACAGTTTGT<br>TCTATCATGGCATCATGGTGGGAGAGGCTAGAGGACCCCCAGGGAGGGCCAAGGCTAAACGAACAATTAGG<br>ATGAATGTTTCAATTGATGTATCATACGGATCGTATTGTGTCTAATCCTGATTTTAGGACAGATTTCTGTTT<br>AGGGTTGTTGACTATGACCAGCTTCTCCAGAGTTCAGGGCAGGTTAAGATCTTGAACCTGTTCAAGAAAC<br>ATATTGTGGTCAAAATGAATTGTACCAACCACTTTCAATATTCTTACACAGGGAATTCAGAGACAGAGTTGT<br>AAGCGCAAGGTTAAAAATTAATCATCCATGTATAATTAGTATTAGTATTAGTATTAGTATTAGTTTCTTTTT<br>TACTGATTATTGTATAATTCTTGTATAAAAAATAATGAAAAATTTCTTTGTTTTTATGTTTTTATGTTATG<br>GGAAAAGGAGTGATTATGGGAGAAATTTTTGGGCTTGTGAGTGTCTTTTCTTTTTTAAAGCAAAAGACAAC<br>TTGCTCTACAATCTCTCAATTTGGGCTACCAATTCCTTTGAAAGTTATTATTTCATATGGCACTAAGCAAG<br>ATTTGCGTGAATCTGA                                                                                                                                                                                                                                                                 |
| CrLEA2-10 | ATGCAAAATACACGATCAAGAAGAACCAACCCAACAACACTCACAAAACCAACCTCATCATTTCCGCTGTCAA<br>AGTGCCCTCAACAACAACACTACAACATGGACAAAGGTATCCCTCCTCGCTTCAAACCCCAATGCCCAAAAC<br>GTGAACACTGCATTTTGCATCAGTTTTTCTCCTTCTACTTGGCATCATTTTCTCCTCTGGCTCGCT<br>TACCACCCCTTCCAAGCCACGCTTACGGTGGCCAGCGCGCCATCTATGGCGTCAACACCACATCACCGCC<br>ACTCATGTCCATCACAATGCAATTAATATCCTCATTAGGAACCCAACAAGCGTGTCTCAATCTACTTTG<br>ACAGACTCTCTGCTTACGTGTCCTACAGAAACCAACCAATCACGCCACGTGTCTGCTGCCACACTCTTC<br>CTCGAGAAACACAGCGCGCTCTCGCTGTGCGCGGAGATCGGAGGCTGCGGCTGCGGCTGCGGAGGAGGT<br>CTCAAAATGGATTGGCAATGGATGAGAGTTATGGGGTGGTGGCTGTGAAGCTTATGTTTCTTGGAAAGGTTAA<br>GGTGGAAAACCTGGTGACATAAACTCTGCACATTATGGATTGTATGTCAAATGTGACGTGTTAATGGGTTT<br>AGGAAAGGTTTTGTGGGTGAGGTTCTCTCTCGGAGCTCCGGTTTGTGAAGTGAATACTTGA                                                                                                                                                                                                                                                                                                                                                                                                                                                                                                                                     |
|           | ATGACTGATAGAGTCCATCCCTCCGCCAACGGCGGAAAAACCGCCACATTTCCCGCCACAAAATCTCAACT<br>TTACGGCGCCACCCGTCCCTCCTACTGCCCAACCGTATCACCAACGCGGTAGCAGCAGTCGGGGATGGT<br>GTTGCAGCCTCTGCCTCTGCCTCATCCTCATCCTCCTCTTCTCCTCCTCCTCATCGGCGCGCCGGCAGC<br>GTCGCGTACTTCTCTACCAACCTCAACGACCTTCTTCTCCGTACCTCTCTGAAACTCTCGTACCTGAA<br>ACTACCTCTTCTCGACTCTTAATTTCAAGTTTGAAGTCAAACTCTCAGCCACAACCTTAACAACAAAA<br>TTGTCTTCTCCTACGACCCACATCCGTCTCCATCCTCTCCAACGAAGACATCGACATCGCACACGGCACC<br>ATTCCCTCCTTCCGCCACTCCCAGAGGAACATCACGATCCTCAAAGTTTCCATTGCGAGCAGCGAGGAAAG<br>CGTGAGAGCGACGCGCGATGCGGCTGAAGGGATCATGAAGAGCAATAGCGGGTTGGCGCTGAAGGTGA<br>AATTGGAGACGAAGGTGCAGGCCAATATGGGTGTGCTTCAACCCCAAGTGTCCCGGTTACTGCTTCTGT<br>GATGGCGTCGCCGTCACTTCCCAGCGAGATAAACCGCGCAGCGCTCCATCGCGAACCGGAGTGCAAA<br>CGTGGATGTGAGGTTCAAGATATGGAATGGACCGTTGGATGA                                                                                                                                                                                                                                                                                                                                                                                                                                                                                          |
| CrLEA2-11 | ATGATGATGAGAAACAACCCCAATTGAACGGAGCCTACTATGGCCCTTCAATTCCGCCACCAAAATCTTACCA<br>TCGCCACGGCGCGCGGCTGCGACTGCTGTGGTGTATCTTCAGCTGTATCTTCAGCTGTATCTTCAACTGATCC<br>TGACGGTGATCATCATCGTTGGAATCGCGCTCTTCTGTGCTCATCGTTCGACCAACCGTGGTGAAG<br>GTTACGTTGACGGAGGCGACCTTGACGGAATCAACTACACGGGGAACACCTTATACTATGACTTTGGCTCT<br>GAACATGACAATTGCAACCCCAACAAGAGGCTGGGTATCTACTATGATCGCATCGAAGCCCGTGAATTT<br>TCCAGGATGCAAGGTTGGACTCCAAATTCCTGGAGCCCTTCTATATGGGCCACAAGACCACCAAGCTTTTG                                                                                                                                                                                                                                                                                                                                                                                                                                                                                                                                                                                                                                                                                                                                                                                                                                   |
|           |                                                                                                                                                                                                                                                                                                                                                                                                                                                                                                                                                                                                                                                                                                                                                                                                                                                                                                                                                                                                                                                                                                                                                                                                                                                                                               |
| CrLEA2-12 | ATGATGATGAGAAACAACCCCAATTGAACGGAGCCTACTATGGCCCTTCAATTCCGCCACCAAAATCTTACCA<br>TCGCCACGGCGCGGCTGCGACTGCTGTGGTGTATCTTCAGCTGTATCTTCAGCTGTATCTTCAACTGATCC<br>TGACGGTGATCATCATCGTTGGAATCGCGCTCTTCTGTGCTCATCGTTCGACCAACCGTGGTGAAG<br>GTTACGTTGACGGAGGCGACCTTGACGGAATCAACTACACGGGGAACACCTTATACTATGACTTTGGCTCT<br>GAACATGACAATTGCAACCCCAACAAGAGGCTGGGTATCTACTATGATCGCATCGAAGCCCGTGAATTT<br>TCCAGGATGCAAGGTTGGACTCCAAATTCCTGGAGCCCTTCTATATGGGCCACAAGACCACCAAGCTTTTG                                                                                                                                                                                                                                                                                                                                                                                                                                                                                                                                                                                                                                                                                                                                                                                                                                     |
|           |                                                                                                                                                                                                                                                                                                                                                                                                                                                                                                                                                                                                                                                                                                                                                                                                                                                                                                                                                                                                                                                                                                                                                                                                                                                                                               |
| CrLEA2-13 | ATGATGATGAGAAACAACCCCAATTGAACGGAGCCTACTATGGCCCTTCAATTCCGCCACCAAAATCTTACCA<br>TCGCCACGGCGCGGCTGCGACTGCTGTGGTGTATCTTCAGCTGTATCTTCAGCTGTATCTTCAACTGATCC<br>TGACGGTGATCATCATCGTTGGAATCGCGCTCTTCTGTGCTCATCGTTCGACCAACCGTGGTGAAG<br>GTTACGTTGACGGAGGCGACCTTGACGGAATCAACTACACGGGGAACACCTTATACTATGACTTTGGCTCT<br>GAACATGACAATTGCAACCCCAACAAGAGGCTGGGTATCTACTATGATCGCATCGAAGCCCGTGAATTT<br>TCCAGGATGCAAGGTTGGACTCCAAATTCCTGGAGCCCTTCTATATGGGCCACAAGACCACCAAGCTTTTG                                                                                                                                                                                                                                                                                                                                                                                                                                                                                                                                                                                                                                                                                                                                                                                                                                     |
|           |                                                                                                                                                                                                                                                                                                                                                                                                                                                                                                                                                                                                                                                                                                                                                                                                                                                                                                                                                                                                                                                                                                                                                                                                                                                                                               |
| CrLEA2-14 | ATGATGATGAGAAACAACCCCAATTGAACGGAGCCTACTATGGCCCTTCAATTCCGCCACCAAAATCTTACCA<br>TCGCCACGGCGCGGCTGCGACTGCTGTGGTGTATCTTCAGCTGTATCTTCAGCTGTATCTTCAACTGATCC<br>TGACGGTGATCATCATCGTTGGAATCGCGCTCTTCTGTGCTCATCGTTCGACCAACCGTGGTGAAG<br>GTTACGTTGACGGAGGCGACCTTGACGGAATCAACTACACGGGGAACACCTTATACTATGACTTTGGCTCT<br>GAACATGACAATTGCAACCCCAACAAGAGGCTGGGTATCTACTATGATCGCATCGAAGCCCGTGAATTT<br>TCCAGGATGCAAGGTTGGACTCCAAATTCCTGGAGCCCTTCTATATGGGCCACAAGACCACCAAGCTTTTG                                                                                                                                                                                                                                                                                                                                                                                                                                                                                                                                                                                                                                                                                                                                                                                                                                     |
|           |                                                                                                                                                                                                                                                                                                                                                                                                                                                                                                                                                                                                                                                                                                                                                                                                                                                                                                                                                                                                                                                                                                                                                                                                                                                                                               |

|           |                                                                                                                                                                                                                                                                                                                                                                                                                                                                                                                                                                                                                                                                                                                                                                                                                                                                                                                                                                                                                                                                                                                                                                                                                                                                                                                                       |
|-----------|---------------------------------------------------------------------------------------------------------------------------------------------------------------------------------------------------------------------------------------------------------------------------------------------------------------------------------------------------------------------------------------------------------------------------------------------------------------------------------------------------------------------------------------------------------------------------------------------------------------------------------------------------------------------------------------------------------------------------------------------------------------------------------------------------------------------------------------------------------------------------------------------------------------------------------------------------------------------------------------------------------------------------------------------------------------------------------------------------------------------------------------------------------------------------------------------------------------------------------------------------------------------------------------------------------------------------------------|
| CrLEA2-15 | AATCCTGCGTTCAAGGGTCACCAGGTGGTTCCACTCAACACTGACCAAACCTGCGGAATTGAAGAAGGAGAA<br>CAGACACGGGATTTACGAGATTGATGTGAAGCTGTACCTCAGGGTGAGATTCAAGTTGGGAGTGTTCAAGA<br>CCAAGACGCTCAAGCCTAAGGTTACCTGTGACTTACGCGTGCCCTTTCACCTCACCTAATGGACCCCTCGCCA<br>GCGCTCGGTGCTTTCCAGACTACCAAGTGCATTGGGATCGTTGA<br>ATGGCCGATAAGCAACCTCAGCTGAACGGTGGCTTTTACGGTCCTGCCATTCCCCACCAGCGCAGCAACC<br>ACGCTACCATCGCCACCACCGGGCCGAAGCTGCTGTTGCTGCCTCTTCGGAATCTTCTGGAAGATTCTGG<br>TTGCGCTCATTTGCTGGCAGGCCCTGGCAGGCCTCATCTTCTACCTGGTGGTTCAACCCCGCTCCTTCAAG<br>TTCTACGTCACGGAAGCCAACCTTAACCAATTCTGAATACACAGCAACAACAACACCCCTTAACACGACAT<br>GGTACTCAACTTCACTGCCCCGAACCCCAACAAAAGCTGAGCATCTACTACGACAAAGTGAGGCTTTAA<br>CATTTCTACGAAGGAGCCAGGTTTACGCAATTACGATGTCTACGCACTTCAACTCATTCGGCAGTATAAG<br>AAGAGCAGCAGCCCATGAGCGGCTTTTCAAAGGGAACAGAGTGGTGGTCTGGACAATTGACAGCTTTT<br>TGAGTTAAACAGAGACAGAATGAAAGGGTTTATGATATCTATGTGAGGCTGTACTTCAGGATTAGGTTCA<br>GACTCGGTGACGTATATCCAGGGACTTCAAGCCCAAGGTCAAATGTCACCTCAAAGTTCCTTAGCTTCT<br>ACCACCACAACTCTGTTTCAGCCCAACAGTGCAGCTCGATTTCTAG                                                                                                                                                                                                                                                                                                            |
|           | ATGTCGGTGAAGGAGTGTGACCACCACAAGGGGAAGAAGCACAATACTTCCGGCGCATCTTCTGGGGCAT<br>AGTGATCTTCGTGTTTATCGTGGTGAACAATTCTGATAATATGGGCAATCCTTAAAGCCTACGAAGCCAA<br>CCTTCATCCTCCAAGACGTACCGTTTACGCCCTTCAACGCAAGCATCCCCAACCTCCTCACCTCCAATTTT<br>CAGGTGACACTCTCCTCTCGTAATCCCAACGACAAAATCGGCATCTACTATGACCGTCTCAATACATATGT<br>CACTTACCAGAACAGCAGGTACCTACCGCACTTCCATTCTCCTCCTTACCAAGGTACAAGGAAGAGG<br>ACGCTGGTCACCGTTTTCGTTCAGGTATTAATGTCCTCCCGTGTCTCCCTATAATTCGTAGGCTCAGTTCA<br>GACCAGTCTAACGGTAACGTCTCTCGTTATCGTTAAATTTGACGGCAAGGTCCGTTGGAAGGTCCGTGCTT<br>TATCTCCGGCCATTACAACCTCTATGTACGCTGCCCTGCTTTCATCACATTTGGCCCTCGGAGTAACGGAA                                                                                                                                                                                                                                                                                                                                                                                                                                                                                                                                                                                                                                                                                                                        |
|           | TTGCCATTGGCGATAACGCTGTTAAGTATCAATTGGTTCAGCGTTGCACCGTTGGCGTTTGA<br>ATGGAAAAGGACAAAATTTCCGGTTCAACCAACAGTGCAGTGTGCACATGCATCAATCTTCTTCTGTT<br>AGTCGCCATCACTCTCCTCGTCTCTGGCTCGTCTACCGTCCCCACAAGCCTCGCTTCGTGGTGGTGGCG<br>CCGCCATCTACGGCCTCAACACAACCACCCCTCCCTCATGTCTGCCACCATGACGCTACCGTCTCTCATT<br>AGGAACCCAAACAGGCGGCTCTCCGTTTACTATGACAGATTCTCCGCTTCGTTTCTACAGGAACCAAGC<br>CATAACGCCCTCAGGTTGCGTGGCCACCGCTGCACAGGACAAGCAGCAGCGGTGCACATTCGCCCGGTGA<br>TCGGAGGCACGGCGGTTCCGGTGTGGTGGAGGTGTCAAATGGGTTGATGGTGGACGAGGCTTATGGGGTG<br>GTGGGTCTGAAGCTGACTTTTCAGGGAAGGGTGAGGTGGAAGGCTGGAGCCATCAAACCTGCACACTACGG<br>ACTGTATGTCAACTGCAACTTATTGATGGGTTTGAAGAAAGGTTTTGTTGGTCCAGTTCTCTCTCGGAG<br>CTCAACCTTGCGATGTCGATTATGA                                                                                                                                                                                                                                                                                                                                                                                                                                                                                                                                                                                                                               |
|           | ATGGATGTTTCCGCTTCTAATTCCGATTGCTTCTGGTGGAAAGAACTTCATCCCGGATTTTCTTTTAAAAA<br>ATGCTGCTTCTTTCTGCTTATCTTCTTTTGATCATATGCATGGTGGTTGGATTAGCCACTTTTTTGTGTA<br>TCCTCATCGTTAGACCCCAAAACCGGTTTTCTCTGTTAGAGAGGTTCAAATAAATTTTACAAGATTGAT<br>GATCGTTCTAATCTGACACTGTGGTTTTCATCTGTAATCTCCTTAACCTCAATGGAGAAAATCATATAA<br>GTTTGGTATAGGTTTTAGTCCATCAAGGTTCTCTGTTTATCAAGAAGGCTTGCATATAGGAATATTCGAG<br>TTCCATGGTTTTTTCAACCTCCTCAGACTGAAAATGTGACCGTACCATCTCGTGTCTATTGCAATGTGTT<br>AATCTCAGCAAAATTGTGCGCAACACATCCTTACAAGAAATGTCAAAGCAAAACACGGCGCGCATCAAGAT<br>CACAGGGGATGCCAGAGTCCACGTGTGGTCACTTATATAAACTTTTGGAGATTAAAGTTAGCTCTGCAA<br>TTCTTCTTTTTTCTTTCTCTCCAATTTTTAGACTCAACTATATTTTGGAGTACAATACTTAATTTCTACT<br>AAAAAACACTACTATATCTTTTTCATTGAAATTTAAACCTATACATCTAACTCCTAAAGGAATACTTATTG<br>CTTAATCAACTAAGTGTGATCCATTGGTTTGGTCTCGCTGTTAGTTAGCACAATAATTGAAGCTAGAAAAA<br>TCGAAATGAAATGAAAAAAATTACAAAAATAAGGTACCAAGAAAGTTCTCTTATTGACTTTTTTTTGTG<br>TTGTATTGATTTATTGTACGCATTAAATTTAGTATTATCATTATTTAAATATCCACCGGCATCAATCATA<br>GACCTATATATACATAAAGGTGAGGGAATATTATTGCTGATTGTATTTTGCAGATTGCACTAGATTGTG<br>GTATGAATTTTAAATAAAGAGGTTTGGTTTTCACAAATGAAGCGTTTGGTGCCAAAATTAGCAAGAGTGAC<br>TTGGTATTGACTATTAATTTGTGAACTTGTTCGTTTATGCTTTATTTGGTAGGCTTAGTAAGTATGATT<br>GAAAGCCTTATATACCTATAAAGTTTTGTTTCAGGGTTTCAAGTTCTCAGTGATTCAAAGGCATCTCTATGA<br>AATGTGCTTCATCTGTCTACATATAA |
|           | ATGTCCTGCATTAGCACCAAAAACAAGAAATCATGACAGAAGCACAAAATAATGAGGATCAAGAGCAAGTGGT<br>GGTGATTTTCAAAAAAAGCTCAAGAGAAAGAAAAGTGTGTGAATTACCACAGGAGTAGTGTGTTACTTTC<br>TTGTGGTGCATAATCATAGTGGGGCTTGTCTTGTGTTTGAACCTTGCTCAAGCCTAAAGATCCAAGGGCAGAC<br>CTTGTCTTCTGCCACTTTGGAGGGTATAGCACTCGTGTGCACACTTCTGCTATTGACATACAAATCAATGT<br>TACTCTTGATCTCAAGATTCAAGTTGAGAACAGAAACCATGTTAGTTTCAAGCATCAAGAGGGAAGAGTG<br>TTTTGTTATATGGAGGAAAAGAGGTTGGAGAGACTCAGTTATACCTCGGTGATTTCTTCAAGGGTTCT<br>ACTATACTTCTTGTAGACTCACCTTTCAGGCAGAGAACTTGTCTCCAATTTTTCTGGTTTGGTTGAGGA<br>CTTGATGGGAGGACAAATCTCCATGGGAGCTGTTACTAGGATTCTTGGGAGAGTTACCTTCTTGGATTCA<br>TAAAAAACATATTTATTGCTAAGTCCAATTGCCAATTCACTGTTAGTGTTTCTGACTTCAAGATCATTAGC<br>CAAGCTTGCAAGAAATAAGGCCAAACTATGA                                                                                                                                                                                                                                                                                                                                                                                                                                                                                                                                                                                                        |
| CrLEA2-19 | ATGATAGAAAAATATGGGCACCGCAAAAAGAGTAACATGTGCCTGGTGGTAAACATGTATTGCAGTGATAGC<br>AATTCTGGCGGTAGCAACGATCTTAGTATCAACGATGTTAAACCAAGGCAACCTATAACCAAAGTGGAAG<br>GCATAAGGCTTGATGACATGAATATGAACATGAATATGTTTAAAAATGAGGATGGATATTAACGTGACATTG<br>AAAGTGGATATGTGCGTGGGAGAACACAAATAAGTTTGGATTGTGTACAATGATAGCCTTGTCTCACTCAA<br>CTATGGAGGGGAATTAATTGGGGAAGCCCCAATACCCAATGGAGAGATATTATCTGAGGAACTAAAGGAA<br>TGAACCTTGACACTAACCATTATGGCTGATCGCATGTTCTCCAATTCTCAAGCTTTCAAAGATGTTACAACG<br>GGTTCATTGCCCCCTCAACACTATTGTTAACTTTCTGGCCAAGTCATCATCTTGGGCCCTCATCAATTTTCA<br>TGTGGGTTCCACCTTATCTTGTGATTTCACCTCAATGTTTCCAATAGAACCATTTGACCACAAAGAGTGTC<br>ACCATGACACAAAGATTGA                                                                                                                                                                                                                                                                                                                                                                                                                                                                                                                                                                                                                                                                                         |
|           | ATGAGAGTGGGTTTGGGTGTGAAGTGTGCTTGGGTGTGATCGGTGTGAGTCTGATATTGGCAGCGTTTAA<br>AATGTCGGAGTTGTTGGACAAAGCCAAAACTATGTTTCAAGAAAGTGGCCAACATGCCAAACCTGAGG<br>CCGCTGTGCTGACGTGGATTTCAGCGCGTGAGTCGAGAGGGCGTCGAGTACTTGGCCAAGGCTCTGTGTT<br>TCCAATCCTTATCCCTCTCCCATTTCCAATCTGTGAGATCAAGTACTCCCTCAAAGTGCTGGCAGGTTTCG<br>ATTTCTATTTCTTTTTAATTTTTCTGTTCTTAAGCGAGGAAAACGGAAAGGTGAGAAAGTTTATTAATT<br>AAAGATATAAAGTAATATATCTTAGAAATTTAAACTAATTCAAATCAATAATATATCTTTCTTAGACCAA<br>ATCGGAATTTTTATTATTATTTGATGAATTGTTGGGATAATTGGATTGTTTTTCGATTGGTTTTGTGTTGGGT                                                                                                                                                                                                                                                                                                                                                                                                                                                                                                                                                                                                                                                                                                                                                                                                   |
|           |                                                                                                                                                                                                                                                                                                                                                                                                                                                                                                                                                                                                                                                                                                                                                                                                                                                                                                                                                                                                                                                                                                                                                                                                                                                                                                                                       |
|           |                                                                                                                                                                                                                                                                                                                                                                                                                                                                                                                                                                                                                                                                                                                                                                                                                                                                                                                                                                                                                                                                                                                                                                                                                                                                                                                                       |
|           |                                                                                                                                                                                                                                                                                                                                                                                                                                                                                                                                                                                                                                                                                                                                                                                                                                                                                                                                                                                                                                                                                                                                                                                                                                                                                                                                       |
| CrLEA2-21 |                                                                                                                                                                                                                                                                                                                                                                                                                                                                                                                                                                                                                                                                                                                                                                                                                                                                                                                                                                                                                                                                                                                                                                                                                                                                                                                                       |
|           |                                                                                                                                                                                                                                                                                                                                                                                                                                                                                                                                                                                                                                                                                                                                                                                                                                                                                                                                                                                                                                                                                                                                                                                                                                                                                                                                       |
|           |                                                                                                                                                                                                                                                                                                                                                                                                                                                                                                                                                                                                                                                                                                                                                                                                                                                                                                                                                                                                                                                                                                                                                                                                                                                                                                                                       |
|           |                                                                                                                                                                                                                                                                                                                                                                                                                                                                                                                                                                                                                                                                                                                                                                                                                                                                                                                                                                                                                                                                                                                                                                                                                                                                                                                                       |
|           |                                                                                                                                                                                                                                                                                                                                                                                                                                                                                                                                                                                                                                                                                                                                                                                                                                                                                                                                                                                                                                                                                                                                                                                                                                                                                                                                       |

|           |                                                                                                                                                                                                                                                                                                                                                                                                                                                                                                                                                                                                                                                                                                                                                                                                                                                                                                                                                                                                                                                                                                                                                                                                                                                                                                                                                                                                                                                                                                                                                                                                                                                                                                                                                                                                                                                                                                                                                                                                                                                                                                                                                                                                                                                                                                                                                                                                                                                                                                                                                                                                                                                                                                                                                                                                                                                                                                                                                                                                                                                                                                                                                                                                                                                                                                                                                                                                                                                                                                                                                                                                                                                                                                                                                                                                                                                                                                                                                                                                                                                                                                                                                                                                                                                                                                                                                                                                                                                                                                                                                                                                                                                                                                                                                                                                                                                                                                                                                                                                                                                                                                                                                                                                                                                                                                                                                                                                                                                                                                                                                                                                                                                                                                                                                                                                               |
|-----------|---------------------------------------------------------------------------------------------------------------------------------------------------------------------------------------------------------------------------------------------------------------------------------------------------------------------------------------------------------------------------------------------------------------------------------------------------------------------------------------------------------------------------------------------------------------------------------------------------------------------------------------------------------------------------------------------------------------------------------------------------------------------------------------------------------------------------------------------------------------------------------------------------------------------------------------------------------------------------------------------------------------------------------------------------------------------------------------------------------------------------------------------------------------------------------------------------------------------------------------------------------------------------------------------------------------------------------------------------------------------------------------------------------------------------------------------------------------------------------------------------------------------------------------------------------------------------------------------------------------------------------------------------------------------------------------------------------------------------------------------------------------------------------------------------------------------------------------------------------------------------------------------------------------------------------------------------------------------------------------------------------------------------------------------------------------------------------------------------------------------------------------------------------------------------------------------------------------------------------------------------------------------------------------------------------------------------------------------------------------------------------------------------------------------------------------------------------------------------------------------------------------------------------------------------------------------------------------------------------------------------------------------------------------------------------------------------------------------------------------------------------------------------------------------------------------------------------------------------------------------------------------------------------------------------------------------------------------------------------------------------------------------------------------------------------------------------------------------------------------------------------------------------------------------------------------------------------------------------------------------------------------------------------------------------------------------------------------------------------------------------------------------------------------------------------------------------------------------------------------------------------------------------------------------------------------------------------------------------------------------------------------------------------------------------------------------------------------------------------------------------------------------------------------------------------------------------------------------------------------------------------------------------------------------------------------------------------------------------------------------------------------------------------------------------------------------------------------------------------------------------------------------------------------------------------------------------------------------------------------------------------------------------------------------------------------------------------------------------------------------------------------------------------------------------------------------------------------------------------------------------------------------------------------------------------------------------------------------------------------------------------------------------------------------------------------------------------------------------------------------------------------------------------------------------------------------------------------------------------------------------------------------------------------------------------------------------------------------------------------------------------------------------------------------------------------------------------------------------------------------------------------------------------------------------------------------------------------------------------------------------------------------------------------------------------------------------------------------------------------------------------------------------------------------------------------------------------------------------------------------------------------------------------------------------------------------------------------------------------------------------------------------------------------------------------------------------------------------------------------------------------------------------------------------------------------|
| CrLEA2-22 | <p>GATGAAAGGGAGATAGCATCAGGGACAATACCAGATCCAGGGTCGTTGAAGGC AAAAGACACAACAATGCT<br/> AGATGTGCCAGTGAAGGTGCCTCATAGCATATTGTTAAAGCTTGGCAAGGGACATTGGTAGAGATTGGGACA<br/> TAGACTATCAATTGGATCTTGTCTTAATTATTGACCTTCTGTGGTTGGCAACTTCAGTATTCCTCTTTCT<br/> CAGCAGGGAGAGATCAAAC TCCCCACCATCTCTGATATGTTTACCTAA<br/> ATGTGCAAAACCGTAGGCAGATTATTGGCCTTACTCTTGGTCATTATCCCCGTAACGGTGACCGTTACGGC<br/> CTTTCTTTTTTGTCTCATTGTGCGACCCAAACGTCGTTAAATTTTCAGTGAACCGATGCTACCCCTCGCCCAAT<br/> TCAGTTACACTAATAACACCCTTTACTACGATCTCACCCCTCATCGTGAAGTTCGCAACCCCAACACAAAG<br/> ATCAGAATCCACTATAACTACATGGAAGTGTGTTATACCAAAATGTGAAGTTCGTTCGTCTGATCTT<br/> AGGAACCTACATTACGCCACACAAGAACACTGCCATGTTGACTCCTGTTTTTAAAGGTCAACAAGTCATGT<br/> CCCTCAACAAAGACCACATTTTGGAGACTTACAATAATGAGAAGCGTTCCTGGGATTACCACATCGATTTT<br/> AACTTTACTTGAAGTTAAGTTCGATTTGGGTGTGTACAAAATAACAATATGAAGTCCACGGTGACTTG<br/> TAACCTACAACCTCCCTCTTCAATCTTACAATGGAACCTCAACCGCTGGTAGGTTTCAACTTACCCGCTGCA<br/> ACTTCGATTACAAACATATTTTGTATTATTTCTGA<br/> ATGGCTGATTATAAGCAACCCCACTAAACGGTGCGTATTATGGCCCTTCCATTCTCCAGCGGAGCCACC<br/> ACGCCAACGCGCTCACCGCGGGAGAAAGATGCTGTTGCTGCCTCTTCAGCTTCTCTGGAAGTTTCTCCTCG<br/> CAATCGCTGTCTCATTTGGCCTCGCCATCTCATCTTCTGGCTCTTAGTTCAACCCAGCGCTTCAAGTTG<br/> CACGTGACGGAAGCGAGTCTCACTCAATTCACCTACACCTCCAACACTCTCCAGTACAATCTCGTCTCAA<br/> CTTCACGGCCCCGAAACCCTAACAAAAAACAACATCTACTATGACAAAGTGGAGGGTCAGTGTTCACG<br/> ACAGCGTCAGGTTTCGCTTCAACGGACGTTATCACAGGGAAAAACTCGTTCGTCATACAGGAAGAGCACG<br/> AACCGCATGAGCGCGGTTTTCTCGGGGAAACATGTGGTTGTCTTGATGCCTCTGATTTGAAGGATGATAA<br/> GAGGAAAGGGGTTTTGACATTGATGTGAAGCTCTATTTTACCATTAGGTTACGGCTCGGTGACTTCATAG<br/> GTGGTGACACCATGGCCAAGGCTAAATGTGAGCTTGAGGTTCCCTTCAGGTC TAAGGGGACTGAGGTTACT<br/> CGGTTTCAACCCACCGAGTGTGATGTGATTTTGGGGTCCCTATTTACGCTCTTCCCTCTAATTTAA<br/> TTTTCTCATTCCTTCGATCTTGGTTGCTATTTTCTACTTGCATTTTCTAGGTTTGTGTAATTTGAATTTT<br/> GTAAAAAAGAAAAAGAAAGTATATGGTCTGTCTATTTTCTTTGCCCGTAGCTTTTTCTTTTATGTGG<br/> AATCTTGTTTATTGAATACATATTATAACAGTAGATATTTTCATCTTAAATATTTATTTTATTTTATTT<br/> TTATATTTATAAATATTTAATTTAGAGAATGTATATTGAATAATGGGTATTTTTATTTGGTTTAAATACA<br/> TTTTTAGTTTTTATAAAGTGGACTACTTTTTTAGTTAATTTTTTAAATTAATTAATCTTATTTTAAAG<br/> TTTAGTAAATTTAGTTTTTGTAGATTTTATTTTACTTTAATTTTTTAAATTTCTTTATTTTATCTAAATTT<br/> TTCAAATTTATAATGAAATTTGAAATAAAAAATAAAAAATTTAGTGATAATCTAATAAAATTTAAATAAATTT<br/> GTAAATATGATATTAGAGTTTGAAGTTGGTAATATGATATTTTGGATACAAGTTTCATATTTAATTTGGTA<br/> AATTTGAAAAAAGACAGTAAATTTAATTTAATAAATAAAAAATTTTAAATAAATAATAGAATTAAAGA<br/> ATTTTAAATAGAAAAATGGTATAAAGAATTTAAATTTAAATATGTTTGTAAATAATTTAAAGAAATTA<br/> ACATATAATTAATTTTTATTTTAAAAAGATAACGCTGAAAGGATGGTATAAAGAAATAGTGTGTGGAT<br/> ATCATATTTTTGACTTTTATATATGTACAAAAATGTATGCATGTGCATTAATAAATATTATAAATTTGATA<br/> ATAAAGTGATTTGGTGAAGTCAAAATGAAATTTGAAACAACCTGCCACCACATGGTTTGGATATTTTCCCAACA<br/> CTCAAGAAAAATTTAAATTTCCAACTTAACTCAATAAAAAATTAATAAAAAAACCTTTTACTTTAAGTC<br/> AACCAGATTTTCAGATAAATGTTTTTCAAGCAAAAGATAAAATTTTATATCATACTTAAATATCACAAAT<br/> ATAACAATTAAGAATTGATGTAGTAAAAATAAATAAATCTTTTTTTTAGGTAAATTACATTTTCATTGA<br/> AACCCAAAAATAGATCAATTAAAAAAGAACGCTGGACCATTTATCCAGCACATGAAGATGAATTTGCTTAT<br/> CCTTTTAGTTTTTTATTTTAAAAATTTATTTGTAATAAAGTTTAAAAACTGTTTTTTTAAAGAAAGTGA<br/> AAGAGAGTAAGTAAAAAATAAATAGAAATATAAACTAACAAAAATAAATAAATACTGAAACAGTTGGA<br/> TTTTTAATTTTTTAAAAAATAAATTTATCAAAATTTTTTATTTATAAATAAAAAATATTAAAAAAGAA<br/> AAATTAACAGTTCTAAGTGATCTAGTCTCCTTTCCCAATCAATGGTATGGGCTTGAATTTTCCGCCCA<br/> TAGTGTCCAATAATACTCATACAATTGAAATGTCTACTAAATTTCCCAATGGCTCTATATTGAGATGAA<br/> TATAAATATCTTTTAAAGTATTTTCAAGTATGAAGTTTTTCTTATCTTGAAGTAAATCGTTTCTCTTGAT<br/> ACATACAAAGACATTTTATAGGGATAAATATTTTTACATGAAACAATCATAGGTACTCGAGTTAAAAAT<br/> ATTTTTCGTTCTTTTATTTTATTTTAAAAATTTTATATACTATATTAAAAATTTTATTTTATTTATTT<br/> TAAGTTAAATTTATACATAATTTTATTTATATTCTTAATGTTTCATCATTTAGTTTATTTATGTTCAATTA<br/> TATTTCTCATACAAGATAAAAGGTATAATGAAATAAAAGATAAATAAATAAATAAATAATATTTTTTAAA<br/> TATTGAAAGCTGAAGTTAAAAAATAGAAGTAATTATAAGACTCATATAATAGGATAAAGACCCTTTTCAA<br/> TTATTTTTTCTCCATTGAAGAATTGTACATAGTTGTTGAATAAAAAATTAACAAATTTTAAATTTTAAAT<br/> TTTTATAAATAAATAAAAAATTAATCTAAATTTATCCAATCTATATTTAACAACGTGATTTTAAAACTGCAC<br/> GTTCTATGATTTTCTTAGCTAAAAAATATGATGGCCCATCTTGTTAAGTGAGTAAAAAATCTTAGGTA<br/> TCAATTTCCCACAATACTTCTATTGATAATGGATATGTATAAAAAATAAGTGGGACGTAGACATGCTAGTG<br/> GAATTTTCTTTAGTTCTACGGTCTTGGACAACCTAATTGAAATGTCCAATAATCTCATCAATTAATTTGA<br/> TGTCAACTAAATCCTAAATGTCCTCATCACTCTAAATTTGAGATATATACAAATATTTATAAGTATTTATTA<br/> AAAAGTTTGATTTTTTTCTTATCTTGAAGTGAATCATTCTTCTCATATATGTAATACATTTATTTAGGG<br/> ATAATCTTTTTTTAATGAGACAATCATATATTTGTATGAAAAAATCACTTATTTTATTTCTTTTTAT<br/> TTAATATTTAAAAATATTTTATACATATAAAAAAAGTAATATTTTTTAAATTTAAATTTATATATAATTTATTA<br/> ATTTATTTTTCAATCTCTCATCGTTAATTTCTCTCTCTTCAATCTCTCAATAATTTCTCCACCCTTAAAGACT<br/> GCTCCATTAAAGCCGTCACCGTGGTTGTTTTGACTGGAACCCACAGAATTATGTCAAAATGTCAACACATA<br/> ACTCGACATGAAGCAGCAATCAAGCATAAAAAAGTCAAAGCCGCGTTAGTTTCTGTTATATCAAGAAATAA<br/> AGATTTGTTCAAAACGCATCTTTATCTTCTATATATATACAGTGACCTCTCTTAGCCTCAAAACAGAAAG<br/> CATTTAACTACACAACCGTCGCAATTGACTCACAAACATGACCGACAAACAAACGCAATTGATGAACATTGG<br/> AAACAACGACCCCTCAGTTCCGCCAACGGAGCAATCACGGCACCTTGGCAGAAGATGCTGTTACTGCCTCT<br/> TCCGAACCTTCTGGGTCAATCTCGTCTCCATCATCATCTCATTTGCCTCATAAATCCTCGTGTGTCATCAT<br/> ATCATCCAACCCCGTTCTTCAAGTTCCAGTGACGGAAGCAAGTCACCCGTTCAATTTACACCGCTAA<br/> CACCCCTCCGTACAACTCTTGTCTCAACTTCACTGCCGAAACCCAAACAAAAAGCTCAACATCTACTACG<br/> ACGAAGTGGAGGGTCACGTGCTCTATCACGGCGTCAGGTTTGCTTCAACGGACGTTATCACGTGGCAAAAC<br/> TCGTTCCGTCATACACGAAGAGCAGAACCCGATGAGCGCGGTGTTCTCGGGGCAACGCGTGATTTGTGCT<br/> TGATCAATAATCGGGCTCAGATTTGGAAGAAGATAAGAGAAGTGGGATTTTTCACATTTGATGTGAGGCTCT<br/> ACTTCACCATTAGGTTACAGCTTGGTGACTTCATATGGAATAGTGATATCAAGCCCAAGCAAGTGTGGG<br/> CTTAAGATTCTTTTCAAGTTCAATGGGACTACGGTGAATGAGTTTTCGGCCCAACAGTGCATGTTGATTT<br/> CTGA</p> |
| CrLEA2-23 |                                                                                                                                                                                                                                                                                                                                                                                                                                                                                                                                                                                                                                                                                                                                                                                                                                                                                                                                                                                                                                                                                                                                                                                                                                                                                                                                                                                                                                                                                                                                                                                                                                                                                                                                                                                                                                                                                                                                                                                                                                                                                                                                                                                                                                                                                                                                                                                                                                                                                                                                                                                                                                                                                                                                                                                                                                                                                                                                                                                                                                                                                                                                                                                                                                                                                                                                                                                                                                                                                                                                                                                                                                                                                                                                                                                                                                                                                                                                                                                                                                                                                                                                                                                                                                                                                                                                                                                                                                                                                                                                                                                                                                                                                                                                                                                                                                                                                                                                                                                                                                                                                                                                                                                                                                                                                                                                                                                                                                                                                                                                                                                                                                                                                                                                                                                                               |
| CrLEA2-24 | <p>ATGTTCGGTGAAGGAGTGCGATCTTCAACAGGGGAAGAAGGGAAGATCTTCTGCGAATATTTCTGGGGAAT</p>                                                                                                                                                                                                                                                                                                                                                                                                                                                                                                                                                                                                                                                                                                                                                                                                                                                                                                                                                                                                                                                                                                                                                                                                                                                                                                                                                                                                                                                                                                                                                                                                                                                                                                                                                                                                                                                                                                                                                                                                                                                                                                                                                                                                                                                                                                                                                                                                                                                                                                                                                                                                                                                                                                                                                                                                                                                                                                                                                                                                                                                                                                                                                                                                                                                                                                                                                                                                                                                                                                                                                                                                                                                                                                                                                                                                                                                                                                                                                                                                                                                                                                                                                                                                                                                                                                                                                                                                                                                                                                                                                                                                                                                                                                                                                                                                                                                                                                                                                                                                                                                                                                                                                                                                                                                                                                                                                                                                                                                                                                                                                                                                                                                                                                                                |

|           |                                                                                                                                                                                                                                                                                                                                                                                                                                                                                                                                                                                                                                                                                                                                                                                                                                                                                                                                                                                                                                                                                                                                                                                                                                                                                                                                                                                                                                                                                                                                                                                                                                                                                                                                                                                                                                                                                                                                                                                                                                                                                                                                                                                                                                                                               |
|-----------|-------------------------------------------------------------------------------------------------------------------------------------------------------------------------------------------------------------------------------------------------------------------------------------------------------------------------------------------------------------------------------------------------------------------------------------------------------------------------------------------------------------------------------------------------------------------------------------------------------------------------------------------------------------------------------------------------------------------------------------------------------------------------------------------------------------------------------------------------------------------------------------------------------------------------------------------------------------------------------------------------------------------------------------------------------------------------------------------------------------------------------------------------------------------------------------------------------------------------------------------------------------------------------------------------------------------------------------------------------------------------------------------------------------------------------------------------------------------------------------------------------------------------------------------------------------------------------------------------------------------------------------------------------------------------------------------------------------------------------------------------------------------------------------------------------------------------------------------------------------------------------------------------------------------------------------------------------------------------------------------------------------------------------------------------------------------------------------------------------------------------------------------------------------------------------------------------------------------------------------------------------------------------------|
| CrLEA2-25 | AATTGTCCTTCTTTTCATCGTGCTCGTTACAATCCTTATAATTTGGGCAATTCTAAGACCCTCAAAACCTT<br>CCTTCATTCTCCAAGACGTACCGTTTATGCCCTCAACGCCACCGTTCCCAATCTGTAAACCTCAAAATTC<br>CAAGTCACACTGTCTTACGGAACCCAAACGATCACATAGGCGTCTATTACGACCGTTTGGATACCTATGATG<br>CACTTACCAGAGCCAGCAAATTACTTACCGCACCGCAATTCTCCCTCCTATCAAGGCCACAAAGAGATCG<br>ACGTTTGGTCGCGCTTGTGTACCGCACCAACGTCCCCGTGCGCGCTTTCAATTAGCCCGTCTTAGTCAG<br>GATCAGTCCAACGGTAACATCCTCGTCACCATTAATAATTGACGGCAGAGTTTCGTTGGAAGGTTGGCGCCTT<br>CATCTCTGGCCGTTACCACCTCTACGTCCGGTGCCCTGCTTTCATCAATTTGGGACCCGGAATAACGGAA<br>TTTCCGTTGGTGAAACCGGCGCCATTAAGTACAGCTTGTTCAGTCATGCTCCGTTAGCGTTTGA<br>ATGGCAGATCATCAGAGACAAAGGATCCACCTATGGAGGTAGGAGCACCACCACCAACCATCCCATTT<br>GGTACCTCCAGGTTCTCAAGATCAGAAAAGGGTAACCTTTACACCGTCCACCACAACATACATGCTAGGC<br>CAGCAATATACCTTCAACAAAAAGGAACTGCTTTTGCAAGTGCATATGTTGGACTCTATGCTTGGTT<br>TTCCCTCGTCTATTATCTTGGCAGCAACTGTTGGAATCCTTTACCTAGTTTTCAAACCAAACCTTCCCAA<br>TTACTCAGTTGAAACACTGAGGATAAGTGATCTTAGGCTCAACTTTGATTTGAGTCTGTATGCAAAGTTTG<br>ATGTGAAGATCAGACAAATAACCCAAATAAAAGATTGGTATTTACTATGAGGAAGGTGGGAAATTGAGT<br>GTGTGGTACAGAAAGACAAGACTTTGTGAAGGGTCATTACCAAAGTCTTACCAGGGTCATCAGAACAAAA<br>AGTGCTGAATGTGCTTGTGACTGGTCAAGTGCAATCTGGAAGCACCTTAATGACGGCAGCAGCAACAAC<br>AGCAAACAGGACGCATTCCATTGGATCTCAAAGTGCATGCACCAGTTGCCATCAAACCTGGGAGGTTCAAG<br>CTGAGGAAGGTGAGAGTCTTGGGTGAATGCTTGTGGTTGTGGATAGCTTATCATCTAATAATCTCATAAC<br>CATCAAGGCTAGCAACTGCAAAATCTCAATGAAACTTTAA                                                                                                                                                                                                                                                                                                                                                                                                                                                                                                                                                                                                                                                                                                                                                                                                                                                        |
|           | ATGCGCAGCAATGACCACATACCCGTTTCATCATGTGCGGGGACCGAACCCGAAACCCATGAAACGACACCG<br>TACCGCTCGGTACTACGTTTCATCGGGTCCATGAAAGCCTCACAACCCGCGTGTCCAAGATAATCTGCGCCA<br>CTTTCTTGGGCTTACTTGCCATTGTGGGCTCATACCTTCATCCTCTGGGTGAGCTCCGGCCCCACCGG<br>CCCAGGTTTCATATCCATGAATTCACATGCCGGGCTGACCCAAACAATCCGGGTTGAAAATGCCCGGAT<br>AACCTTCAATGTAACGTCCCGAACTCCAACAGAACATCGGGGTTACTAGCTGAGTGGAGCGG<br>TTTATTACCGGGACAGAAAATCGGGTCGACATCGTTACTTAATCCGTTTATCAAGAGCCCAAGAACAG<br>ACGGAGGTGACCGGTGATCTCAGTGGTGCCACGTTGACCGTAGTAGTCAACATTGGGCAGAAATCCAAAG<br>CGATAGGGCTGATGGTAGCGTGGTGTTCGCTTGGAGTGACGCTCTGTGATCAGATTCAAGATATCAACGT<br>GGGACAGCAAGCGCCACACGATGCACGCTAAGCTGTGATGTGGGCGTGGGACCCGATGGTTCCCTCTTGTCC<br>AATTACAAAGACAAGAGGTGCCCGTTTATTTCTCTTGA                                                                                                                                                                                                                                                                                                                                                                                                                                                                                                                                                                                                                                                                                                                                                                                                                                                                                                                                                                                                                                                                                                                                                                                                                                                                                                                                                                                                                                                                                                                                                     |
|           | ATGAAACCCCAATCACAACATAACAATGCTCGCCAAGACCGATTCCGAGGTTAGTAGCCTCAGTCAGTCGTC<br>CCCGGCGAGGTCTCCCCGACGGGCGCTCTACTATGTGCAAGCCCATCAGTGACTCTCCAACGACGGCG<br>AGAAGACAACCAATTCATTCCAGTCCAGCGCTGCAAAGCCCATGGGGTCCCCCTCCCCACTCCCACCTC<br>AATTCATCTTTAGGCGCGCATCTCGGCAATCTGCCTCCACCCGCTTCTCGGGCTCCCGAAAGACCAACGA<br>GTCCAACCGCAAGGGCCCATGGAGGCCCTGGAAGGATCAGTTCACGCCCATCGAAGAGGAAGGCCTCCTCG<br>ATGCCCATGACGCTGCACAACATGGCTTCCTCGTCGCTGCTATTTTCTCGCATTTGTTGTGGGCTTTGTA<br>GTGCTCTTCTGTGTTTCTCCCTCATTTCTGTGGGCGCAAGCCGCCCCAGAAACCCGCTTACGTTAA<br>GGTTCCATTCTCAACCAAACTTTGTAAAAATTAATTGATTTTATTTATTTATTTAAACATGTGTGTG<br>CTTTGACAGAGTATTACCTTTGATCAATTTGTGATTCAAGCGGGTGCGGATGTGTGAGGAGTGGCCACAAG<br>CTTGGTATCCATGAATTCCTCAGTGAACTAACCTTCCGTAACACGGCTACATTTTTCGGAGTCCATGTGA<br>CATCAACTCCTCTAAATCTCAATTTATTTATCAGCTTACTCTGCCACCGGAAGTGAGCTTATATGATGG<br>TTGTGACTCTTGAATAATTATAATTTTGGTTTATAATGTGAGATTTGATATGCAGATGCCAAAGTTTATC<br>AATCTAGGAAAAGCCAGAGATCTGTAGGGTGATGGTGAAGGGAGTCATATTCCGCTGTACGGAGGGGGA<br>GCCAACCTGAACAGCGTGAATGGTGCGCCAGTTGAAGCGGTACCATTTGAAATTGAGCGTGATGGTAAGGT<br>AAGAGCTTATGTTTTGGGGAATTTGGTGAAGGCCAAGTTCTACAAGAAGATAGATTGCTCCGTCGTTATGG<br>ATCCGAAGAAGATGGGCAAAACCCATTTCGCTGATGACCAAGTGCATTTATCAGTAA                                                                                                                                                                                                                                                                                                                                                                                                                                                                                                                                                                                                                                                                                                                                                                                                                                                                                                                                                                                                                                                                     |
| CrLEA2-26 | ATGACCAATAGAGGGGGAGAGAGAGAGAGATGACCACAACAGGTAAACCAACCACACCCACATCC<br>ACAGCCACAGCCACAGCCACAGCCACAGCCACAGCCAAACCGTGAGCGAAGACAAAGGCCAGCACCAGCAT<br>CAGACCAAGAAACACCGGCACAAATTTACCGCTTCTTCAAAATGGAATGGTTACAGGCAGTACCAACCAAG<br>ACGCGCTCTCGTTCGTCGCTCGGCGTCTTAAAGGGTGTGTTGCTGTCTGTCTCTGCTGTTCTCGTT<br>GCTGGCACTGTTGGTGTAGCGGTGGTGTGGTAATAATCCTAGCGGTGAAGCCGAGAAGCCACAGTTCCG<br>ATCTTCAGCAAGTTGGGGTGAGTACATGGGCATAACACCCAATCCTCCCTCCACCGCTCCCTCTCCCTC<br>ACCATAGCCTCCTCTTACCGCGCTTAAACCAACAGGTGCGCATCAAGTACGGCCAGTCTAGCTTAC<br>CGTCATGTACCGCGGCATCCCCCTCGGCAAGCCTCCGTTCCCGGCTTCTACCAAGACTCTCACAGCGTCC<br>GACAGTTCGTCGCCACCATCGCGCTCGATCGGGTCAATTTGCTTCAGGCCGATGCCGCCGATTTGATCCGA<br>GACGCTTCCCTCAATGACCGCGTCGACCTTCGTGTCTCGCGATGTTGGTGCCAAGATCCCGTGTGATGAA<br>CTTCGATTTCTGGTGTTCAGGACTCTTACCTTTTCTTCAAAATACATCTTCCCTCTCCCGGAAT<br>CTCCACATTTCTTCCAACAACAATTTCCCAATTCATCTCACATTTCCCTTTTCTTTATTAATCAATTA<br>AACTAATTAATTCAACTTAAAGTGATTTTGATATCTCTTACGCTTTTCTTCTACTCTCTCTCTCTCTC<br>CTGTAACCTGCGAATTCACCTACCCGTGTGTGCGACTCTGCTTTTCTTTACTACTCTCTTTCTTTCTTTT<br>TCCCTCTCGCTAACGTGCGCCCCGAGGACACTGCTCTACTATTTCACTCCCTCTCCCTCTCTCTGTCA<br>TAACGTGCGCCGAAAGTTATTTGTTTTAATATAAAGGATATTATTGTTATTTATATTACTGATAGTGAT<br>GTTTTAAAAACTTTATTTGCTATTTTGTACCAAAATTTATCTTCAACATACTAACACTTACTCGTACACCTT<br>TCTTAACCTCCCATCTCCTAAGATTGATGCATTTTCTATTTTGGGCACATTTTTTCAGTTTCTGTGTCG<br>AGCAGCACCGCTGCATCGCATTCGCATATTTTGGGAGACATCTTTCGGGGGTGTAACCTTCCACTTTTGT<br>GTTTTGGCCTCTTTCTTATGGTTTTTGGTTATTTTATCCCCCTGTCTATGTGTGCGAATGCTGCCTC<br>TTTATGAAAGGAATTTTTTCCATCTCTGGCTACTATTTTGGCTCTCATCCCTATTTTTTCTTAACCTTT<br>ATAGTTTTTCTTTCGATAGTGCATGATAGTATAGTATACCTTTTATAAAAAATATGATATATTATTT<br>TTTTTCTCTGTTAGTTATAAAAAATATGAACATAGTTATAAAATCGAATCCTGGGGCTCTGTCTTTTT<br>TTTTTTGCCCTTAGTTATGTTTTGTTTTAAGTGCTTTTTTTTACGGTCTTTTATGCATTTGTCTGGATA<br>GCATGTTGAGACATTTCAAATAGGTTTCGGTGTGTGTGCTTGTAGAATATTTTTTTTACACCTTGATTTGGG<br>GACTTCTCACTTTTTTTGGGAGGAGGGGGATAACTATAGAAATCCTTAATTTTCAGGGGTCGCATATTGT<br>TTTTAAAAAATGTACTCCTTAAATAGGGGTGAAATGGGAATTTGGAATAAAAAATAAACGGTGGAATTTGG<br>GGGTTAGGGCTCAACTTTAGCCAATACCGAATGATTAGAATGAGCGAAGAAAATGATAAAATGTTAGGTC<br>CCACCAGAGTTACGCTGGGTCCAGGACGCTGGATTTCGTAGTCCAGAGTACCAACCACTACACTATGGTGT<br>CAACACCCCTTTACTATACTGGCTGAAGCTCAATAATGTTTCAATTTTGGTGTGTGCTTAAATGCCCTTTTAT |
|           | ATGAAACCCCAATCACAACATAACAATGCTCGCCAAGACCGATTCCGAGGTTAGTAGCCTCAGTCAGTCGTC<br>CCCGGCGAGGTCTCCCCGACGGGCGCTCTACTATGTGCAAGCCCATCAGTGACTCTCCAACGACGGCG<br>AGAAGACAACCAATTCATTCCAGTCCAGCGCTGCAAAGCCCATGGGGTCCCCCTCCCCACTCCCACCTC<br>AATTCATCTTTAGGCGCGCATCTCGGCAATCTGCCTCCACCCGCTTCTCGGGCTCCCGAAAGACCAACGA<br>GTCCAACCGCAAGGGCCCATGGAGGCCCTGGAAGGATCAGTTCACGCCCATCGAAGAGGAAGGCCTCCTCG<br>ATGCCCATGACGCTGCACAACATGGCTTCCTCGTCGCTGCTATTTTCTCGCATTTGTTGTGGGCTTTGTA<br>GTGCTCTTCTGTGTTTCTCCCTCATTTCTGTGGGCGCAAGCCGCCCCAGAAACCCGCTTACGTTAA<br>GGTTCCATTCTCAACCAAACTTTGTAAAAATTAATTGATTTTATTTATTTATTTAAACATGTGTGTG<br>CTTTGACAGAGTATTACCTTTGATCAATTTGTGATTCAAGCGGGTGCGGATGTGTGAGGAGTGGCCACAAG<br>CTTGGTATCCATGAATTCCTCAGTGAACTAACCTTCCGTAACACGGCTACATTTTTCGGAGTCCATGTGA<br>CATCAACTCCTCTAAATCTCAATTTATTTATCAGCTTACTCTGCCACCGGAAGTGAGCTTATATGATGG<br>TTGTGACTCTTGAATAATTATAATTTTGGTTTATAATGTGAGATTTGATATGCAGATGCCAAAGTTTATC<br>AATCTAGGAAAAGCCAGAGATCTGTAGGGTGATGGTGAAGGGAGTCATATTCCGCTGTACGGAGGGGGA<br>GCCAACCTGAACAGCGTGAATGGTGCGCCAGTTGAAGCGGTACCATTTGAAATTGAGCGTGATGGTAAGGT<br>AAGAGCTTATGTTTTGGGGAATTTGGTGAAGGCCAAGTTCTACAAGAAGATAGATTGCTCCGTCGTTATGG<br>ATCCGAAGAAGATGGGCAAAACCCATTTCGCTGATGACCAAGTGCATTTATCAGTAA                                                                                                                                                                                                                                                                                                                                                                                                                                                                                                                                                                                                                                                                                                                                                                                                                                                                                                                                                                                                                                                                     |
|           | ATGACCAATAGAGGGGGAGAGAGAGAGAGATGACCACAACAGGTAAACCAACCACACCCACATCC<br>ACAGCCACAGCCACAGCCACAGCCACAGCCACAGCCAAACCGTGAGCGAAGACAAAGGCCAGCACCAGCAT<br>CAGACCAAGAAACACCGGCACAAATTTACCGCTTCTTCAAAATGGAATGGTTACAGGCAGTACCAACCAAG<br>ACGCGCTCTCGTTCGTCGCTCGGCGTCTTAAAGGGTGTGTTGCTGTCTGTCTCTGCTGTTCTCGTT<br>GCTGGCACTGTTGGTGTAGCGGTGGTGTGGTAATAATCCTAGCGGTGAAGCCGAGAAGCCACAGTTCCG<br>ATCTTCAGCAAGTTGGGGTGAGTACATGGGCATAACACCCAATCCTCCCTCCACCGCTCCCTCTCCCTC<br>ACCATAGCCTCCTCTTACCGCGCTTAAACCAACAGGTGCGCATCAAGTACGGCCAGTCTAGCTTAC<br>CGTCATGTACCGCGGCATCCCCCTCGGCAAGCCTCCGTTCCCGGCTTCTACCAAGACTCTCACAGCGTCC<br>GACAGTTCGTCGCCACCATCGCGCTCGATCGGGTCAATTTGCTTCAGGCCGATGCCGCCGATTTGATCCGA<br>GACGCTTCCCTCAATGACCGCGTCGACCTTCGTGTCTCGCGATGTTGGTGCCAAGATCCCGTGTGATGAA<br>CTTCGATTTCTGGTGTTCAGGACTCTTACCTTTTCTTCAAAATACATCTTCCCTCTCCCGGAAT<br>CTCCACATTTCTTCCAACAACAATTTCCCAATTCATCTCACATTTCCCTTTTCTTTATTAATCAATTA<br>AACTAATTAATTCAACTTAAAGTGATTTTGATATCTCTTACGCTTTTCTTCTACTCTCTCTCTCTCTC<br>CTGTAACCTGCGAATTCACCTACCCGTGTGTGCGACTCTGCTTTTCTTTACTACTCTCTTTCTTTCTTTT<br>TCCCTCTCGCTAACGTGCGCCCCGAGGACACTGCTCTACTATTTCACTCCCTCTCCCTCTCTCTGTCA<br>TAACGTGCGCCGAAAGTTATTTGTTTTAATATAAAGGATATTATTGTTATTTATATTACTGATAGTGAT<br>GTTTTAAAAACTTTATTTGCTATTTTGTACCAAAATTTATCTTCAACATACTAACACTTACTCGTACACCTT<br>TCTTAACCTCCCATCTCCTAAGATTGATGCATTTTCTATTTTGGGCACATTTTTTCAGTTTCTGTGTCG<br>AGCAGCACCGCTGCATCGCATTCGCATATTTTGGGAGACATCTTTCGGGGGTGTAACCTTCCACTTTTGT<br>GTTTTGGCCTCTTTCTTATGGTTTTTGGTTATTTTATCCCCCTGTCTATGTGTGCGAATGCTGCCTC<br>TTTATGAAAGGAATTTTTTCCATCTCTGGCTACTATTTTGGCTCTCATCCCTATTTTTTCTTAACCTTT<br>ATAGTTTTTCTTTCGATAGTGCATGATAGTATAGTATACCTTTTATAAAAAATATGATATATTATTT<br>TTTTTCTCTGTTAGTTATAAAAAATATGAACATAGTTATAAAATCGAATCCTGGGGCTCTGTCTTTTT<br>TTTTTTGCCCTTAGTTATGTTTTGTTTTAAGTGCTTTTTTTTACGGTCTTTTATGCATTTGTCTGGATA<br>GCATGTTGAGACATTTCAAATAGGTTTCGGTGTGTGTGCTTGTAGAATATTTTTTTTACACCTTGATTTGGG<br>GACTTCTCACTTTTTTTGGGAGGAGGGGGATAACTATAGAAATCCTTAATTTTCAGGGGTCGCATATTGT<br>TTTTAAAAAATGTACTCCTTAAATAGGGGTGAAATGGGAATTTGGAATAAAAAATAAACGGTGGAATTTGG<br>GGGTTAGGGCTCAACTTTAGCCAATACCGAATGATTAGAATGAGCGAAGAAAATGATAAAATGTTAGGTC<br>CCACCAGAGTTACGCTGGGTCCAGGACGCTGGATTTCGTAGTCCAGAGTACCAACCACTACACTATGGTGT<br>CAACACCCCTTTACTATACTGGCTGAAGCTCAATAATGTTTCAATTTTGGTGTGTGCTTAAATGCCCTTTTAT |
| CrLEA2-27 | ATGAAACCCCAATCACAACATAACAATGCTCGCCAAGACCGATTCCGAGGTTAGTAGCCTCAGTCAGTCGTC<br>CCCGGCGAGGTCTCCCCGACGGGCGCTCTACTATGTGCAAGCCCATCAGTGACTCTCCAACGACGGCG<br>AGAAGACAACCAATTCATTCCAGTCCAGCGCTGCAAAGCCCATGGGGTCCCCCTCCCCACTCCCACCTC<br>AATTCATCTTTAGGCGCGCATCTCGGCAATCTGCCTCCACCCGCTTCTCGGGCTCCCGAAAGACCAACGA<br>GTCCAACCGCAAGGGCCCATGGAGGCCCTGGAAGGATCAGTTCACGCCCATCGAAGAGGAAGGCCTCCTCG<br>ATGCCCATGACGCTGCACAACATGGCTTCCTCGTCGCTGCTATTTTCTCGCATTTGTTGTGGGCTTTGTA<br>GTGCTCTTCTGTGTTTCTCCCTCATTTCTGTGGGCGCAAGCCGCCCCAGAAACCCGCTTACGTTAA<br>GGTTCCATTCTCAACCAAACTTTGTAAAAATTAATTGATTTTATTTATTTATTTAAACATGTGTGTG<br>CTTTGACAGAGTATTACCTTTGATCAATTTGTGATTCAAGCGGGTGCGGATGTGTGAGGAGTGGCCACAAG<br>CTTGGTATCCATGAATTCCTCAGTGAACTAACCTTCCGTAACACGGCTACATTTTTCGGAGTCCATGTGA<br>CATCAACTCCTCTAAATCTCAATTTATTTATCAGCTTACTCTGCCACCGGAAGTGAGCTTATATGATGG<br>TTGTGACTCTTGAATAATTATAATTTTGGTTTATAATGTGAGATTTGATATGCAGATGCCAAAGTTTATC<br>AATCTAGGAAAAGCCAGAGATCTGTAGGGTGATGGTGAAGGGAGTCATATTCCGCTGTACGGAGGGGGA<br>GCCAACCTGAACAGCGTGAATGGTGCGCCAGTTGAAGCGGTACCATTTGAAATTGAGCGTGATGGTAAGGT<br>AAGAGCTTATGTTTTGGGGAATTTGGTGAAGGCCAAGTTCTACAAGAAGATAGATTGCTCCGTCGTTATGG<br>ATCCGAAGAAGATGGGCAAAACCCATTTCGCTGATGACCAAGTGCATTTATCAGTAA                                                                                                                                                                                                                                                                                                                                                                                                                                                                                                                                                                                                                                                                                                                                                                                                                                                                                                                                                                                                                                                                     |
| CrLEA2-28 | ATGACCAATAGAGGGGGAGAGAGAGAGAGATGACCACAACAGGTAAACCAACCACACCCACATCC<br>ACAGCCACAGCCACAGCCACAGCCACAGCCACAGCCAAACCGTGAGCGAAGACAAAGGCCAGCACCAGCAT<br>CAGACCAAGAAACACCGGCACAAATTTACCGCTTCTTCAAAATGGAATGGTTACAGGCAGTACCAACCAAG<br>ACGCGCTCTCGTTCGTCGCTCGGCGTCTTAAAGGGTGTGTTGCTGTCTGTCTCTGCTGTTCTCGTT<br>GCTGGCACTGTTGGTGTAGCGGTGGTGTGGTAATAATCCTAGCGGTGAAGCCGAGAAGCCACAGTTCCG<br>ATCTTCAGCAAGTTGGGGTGAGTACATGGGCATAACACCCAATCCTCCCTCCACCGCTCCCTCTCCCTC<br>ACCATAGCCTCCTCTTACCGCGCTTAAACCAACAGGTGCGCATCAAGTACGGCCAGTCTAGCTTAC<br>CGTCATGTACCGCGGCATCCCCCTCGGCAAGCCTCCGTTCCCGGCTTCTACCAAGACTCTCACAGCGTCC<br>GACAGTTCGTCGCCACCATCGCGCTCGATCGGGTCAATTTGCTTCAGGCCGATGCCGCCGATTTGATCCGA<br>GACGCTTCCCTCAATGACCGCGTCGACCTTCGTGTCTCGCGATGTTGGTGCCAAGATCCCGTGTGATGAA<br>CTTCGATTTCTGGTGTTCAGGACTCTTACCTTTTCTTCAAAATACATCTTCCCTCTCCCGGAAT<br>CTCCACATTTCTTCCAACAACAATTTCCCAATTCATCTCACATTTCCCTTTTCTTTATTAATCAATTA<br>AACTAATTAATTCAACTTAAAGTGATTTTGATATCTCTTACGCTTTTCTTCTACTCTCTCTCTCTCTC<br>CTGTAACCTGCGAATTCACCTACCCGTGTGTGCGACTCTGCTTTTCTTTACTACTCTCTTTCTTTCTTTT<br>TCCCTCTCGCTAACGTGCGCCCCGAGGACACTGCTCTACTATTTCACTCCCTCTCCCTCTCTCTGTCA<br>TAACGTGCGCCGAAAGTTATTTGTTTTAATATAAAGGATATTATTGTTATTTATATTACTGATAGTGAT<br>GTTTTAAAAACTTTATTTGCTATTTTGTACCAAAATTTATCTTCAACATACTAACACTTACTCGTACACCTT<br>TCTTAACCTCCCATCTCCTAAGATTGATGCATTTTCTATTTTGGGCACATTTTTTCAGTTTCTGTGTCG<br>AGCAGCACCGCTGCATCGCATTCGCATATTTTGGGAGACATCTTTCGGGGGTGTAACCTTCCACTTTTGT<br>GTTTTGGCCTCTTTCTTATGGTTTTTGGTTATTTTATCCCCCTGTCTATGTGTGCGAATGCTGCCTC<br>TTTATGAAAGGAATTTTTTCCATCTCTGGCTACTATTTTGGCTCTCATCCCTATTTTTTCTTAACCTTT<br>ATAGTTTTTCTTTCGATAGTGCATGATAGTATAGTATACCTTTTATAAAAAATATGATATATTATTT<br>TTTTTCTCTGTTAGTTATAAAAAATATGAACATAGTTATAAAATCGAATCCTGGGGCTCTGTCTTTTT<br>TTTTTTGCCCTTAGTTATGTTTTGTTTTAAGTGCTTTTTTTTACGGTCTTTTATGCATTTGTCTGGATA<br>GCATGTTGAGACATTTCAAATAGGTTTCGGTGTGTGTGCTTGTAGAATATTTTTTTTACACCTTGATTTGGG<br>GACTTCTCACTTTTTTTGGGAGGAGGGGGATAACTATAGAAATCCTTAATTTTCAGGGGTCGCATATTGT<br>TTTTAAAAAATGTACTCCTTAAATAGGGGTGAAATGGGAATTTGGAATAAAAAATAAACGGTGGAATTTGG<br>GGGTTAGGGCTCAACTTTAGCCAATACCGAATGATTAGAATGAGCGAAGAAAATGATAAAATGTTAGGTC<br>CCACCAGAGTTACGCTGGGTCCAGGACGCTGGATTTCGTAGTCCAGAGTACCAACCACTACACTATGGTGT<br>CAACACCCCTTTACTATACTGGCTGAAGCTCAATAATGTTTCAATTTTGGTGTGTGCTTAAATGCCCTTTTAT |
|           | ATGAAACCCCAATCACAACATAACAATGCTCGCCAAGACCGATTCCGAGGTTAGTAGCCTCAGTCAGTCGTC<br>CCCGGCGAGGTCTCCCCGACGGGCGCTCTACTATGTGCAAGCCCATCAGTGACTCTCCAACGACGGCG<br>AGAAGACAACCAATTCATTCCAGTCCAGCGCTGCAAAGCCCATGGGGTCCCCCTCCCCACTCCCACCTC<br>AATTCATCTTTAGGCGCGCATCTCGGCAATCTGCCTCCACCCGCTTCTCGGGCTCCCGAAAGACCAACGA<br>GTCCAACCGCAAGGGCCCATGGAGGCCCTGGAAGGATCAGTTCACGCCCATCGAAGAGGAAGGCCTCCTCG<br>ATGCCCATGACGCTGCACAACATGGCTTCCTCGTCGCTGCTATTTTCTCGCATTTGTTGTGGGCTTTGTA<br>GTGCTCTTCTGTGTTTCTCCCTCATTTCTGTGGGCGCAAGCCGCCCCAGAAACCCGCTTACGTTAA<br>GGTTCCATTCTCAACCAAACTTTGTAAAAATTAATTGATTTTATTTATTTATTTAAACATGTGTGTG<br>CTTTGACAGAGTATTACCTTTGATCAATTTGTGATTCAAGCGGGTGCGGATGTGTGAGGAGTGGCCACAAG<br>CTTGGTATCCATGAATTCCTCAGTGAACTAACCTTCCGTAACACGGCTACATTTTTCGGAGTCCATGTGA<br>CATCAACTCCTCTAAATCTCAATTTATTTATCAGCTTACTCTGCCACCGGAAGTGAGCTTATATGATGG<br>TTGTGACTCTTGAATAATTATAATTTTGGTTTATAATGTGAGATTTGATATGCAGATGCCAAAGTTTATC<br>AATCTAGGAAAAGCCAGAGATCTGTAGGGTGATGGTGAAGGGAGTCATATTCCGCTGTACGGAGGGGGA<br>GCCAACCTGAACAGCGTGAATGGTGCGCCAGTTGAAGCGGTACCATTTGAAATTGAGCGTGATGGTAAGGT<br>AAGAGCTTATGTTTTGGGGAATTTGGTGAAGGCCAAGTTCTACAAGAAGATAGATTGCTCCGTCGTTATGG<br>ATCCGAAGAAGATGGGCAAAACCCATTTCGCTGATGACCAAGTGCATTTATCAGTAA                                                                                                                                                                                                                                                                                                                                                                                                                                                                                                                                                                                                                                                                                                                                                                                                                                                                                                                                                                                                                                                                     |
|           | ATGACCAATAGAGGGGGAGAGAGAGAGAGATGACCACAACAGGTAAACCAACCACACCCACATCC<br>ACAGCCACAGCCACAGCCACAGCCACAGCCACAGCCAAACCGTGAGCGAAGACAAAGGCCAGCACCAGCAT<br>CAGACCAAGAAACACCGGCACAAATTTACCGCTTCTTCAAAATGGAATGGTTACAGGCAGTACCAACCAAG<br>ACGCGCTCTCGTTCGTCGCTCGGCGTCTTAAAGGGTGTGTTGCTGTCTGTCTCTGCTGTTCTCGTT<br>GCTGGCACTGTTGGTGTAGCGGTGGTGTGGTAATAATCCTAGCGGTGAAGCCGAGAAGCCACAGTTCCG<br>ATCTTCAGCAAGTTGGGGTGAGTACATGGGCATAACACCCAATCCTCCCTCCACCGCTCCCTCTCCCTC<br>ACCATAGCCTCCTCTTACCGCGCTTAAACCAACAGGTGCGCATCAAGTACGGCCAGTCTAGCTTAC<br>CGTCATGTACCGCGGCATCCCCCTCGGCAAGCCTCCGTTCCCGGCTTCTACCAAGACTCTCACAGCGTCC<br>GACAGTTCGTCGCCACCATCGCGCTCGATCGGGTCAATTTGCTTCAGGCCGATGCCGCCGATTTGATCCGA<br>GACGCTTCCCTCAATGACCGCGTCGACCTTCGTGTCTCGCGATGTTGGTGCCAAGATCCCGTGTGATGAA<br>CTTCGATTTCTGGTGTTCAGGACTCTTACCTTTTCTTCAAAATACATCTTCCCTCTCCCGGAAT<br>CTCCACATTTCTTCCAACAACAATTTCCCAATTCATCTCACATTTCCCTTTTCTTTATTAATCAATTA<br>AACTAATTAATTCAACTTAAAGTGATTTTGATATCTCTTACGCTTTTCTTCTACTCTCTCTCTCTCTC<br>CTGTAACCTGCGAATTCACCTACCCGTGTGTGCGACTCTGCTTTTCTTTACTACTCTCTTTCTTTCTTTT<br>TCCCTCTCGCTAACGTGCGCCCCGAGGACACTGCTCTACTATTTCACTCCCTCTCCCTCTCTCTGTCA<br>TAACGTGCGCCGAAAGTTATTTGTTTTAATATAAAGGATATTATTGTTATTTATATTACTGATAGTGAT<br>GTTTTAAAAACTTTATTTGCTATTTTGTACCAAAATTTATCTTCAACATACTAACACTTACTCGTACACCTT<br>TCTTAACCTCCCATCTCCTAAGATTGATGCATTTTCTATTTTGGGCACATTTTTTCAGTTTCTGTGTCG<br>AGCAGCACCGCTGCATCGCATTCGCATATTTTGGGAGACATCTTTCGGGGGTGTAACCTTCCACTTTTGT<br>GTTTTGGCCTCTTTCTTATGGTTTTTGGTTATTTTATCCCCCTGTCTATGTGTGCGAATGCTGCCTC<br>TTTATGAAAGGAATTTTTTCCATCTCTGGCTACTATTTTGGCTCTCATCCCTATTTTTTCTTAACCTTT<br>ATAGTTTTTCTTTCGATAGTGCATGATAGTATAGTATACCTTTTATAAAAAATATGATATATTATTT<br>TTTTTCTCTGTTAGTTATAAAAAATATGAACATAGTTATAAAATCGAATCCTGGGGCTCTGTCTTTTT<br>TTTTTTGCCCTTAGTTATGTTTTGTTTTAAGTGCTTTTTTTTACGGTCTTTTATGCATTTGTCTGGATA<br>GCATGTTGAGACATTTCAAATAGGTTTCGGTGTGTGTGCTTGTAGAATATTTTTTTTACACCTTGATTTGGG<br>GACTTCTCACTTTTTTTGGGAGGAGGGGGATAACTATAGAAATCCTTAATTTTCAGGGGTCGCATATTGT<br>TTTTAAAAAATGTACTCCTTAAATAGGGGTGAAATGGGAATTTGGAATAAAAAATAAACGGTGGAATTTGG<br>GGGTTAGGGCTCAACTTTAGCCAATACCGAATGATTAGAATGAGCGAAGAAAATGATAAAATGTTAGGTC<br>CCACCAGAGTTACGCTGGGTCCAGGACGCTGGATTTCGTAGTCCAGAGTACCAACCACTACACTATGGTGT<br>CAACACCCCTTTACTATACTGGCTGAAGCTCAATAATGTTTCAATTTTGGTGTGTGCTTAAATGCCCTTTTAT |





CATCTTAATGCTTCTCTCATCATCTTCTGGATAGTAATCTCACCTCAAGTGTCAAATTCATGTAAGTGC  
ACGCCACCCCTCACACAATTCACCTCACAAACCAACACACCTTACATTACAACTTGAAAGGTCAACATCACACA  
GTGAGAAACCCCAACAACAGCTGAAAGTATATTATAGAGCTATCAGCAATAGCTTGGTACAAAGATAA  
TGACATTGGTTTGGTGAGTTTGACACCCCTTTGACCAAGGCCACAAGAACACAACTTCTCTCAAGCAGTGT  
TTATAGGACAAAGTGTGATTAAAGCTCCAAGCTAAACAACCTTGATGAGTATAAGGAAGAAACAAGTGTGGGA  
ATCTACAATGATTTGGCTGTGGATTGGGATCTTACAATCAGAGCTAAGTTTGGGAAGGTTTCAAGAGCAGTCA  
TTATAATCCACCAATGTGTCAGTGTCTGCTGCTTGAAGTTCCTTTGATTTCCAATGCTAAACAACACCTC  
CTTTCAGTGTCACAAAATGCAGCACTGGTTATTTCTTTAAAGATCGTGATGCTGATGCAGAGGCTGA  
ATGTGTTGCAAAACCCCGCAGCACCTTCTGCTGCATCTACTGCACCTTCTACACTCTCATGATCATCTTTTT  
CCTTCTGTGTATCTTCTGGATAATCATCTCACCTCAAATGTCAAGTTCACATAAAGTGGGCTCCC  
TCACACAATTCACCTCACAAACAACACCTTATATTACAAGTGAAGGTCAACATCAGATTAGAAAC  
CCCAACAACAACATCATAGTATACTATAGGAGAATCAAAGCAATAGCTTGGTACAAAGACATGCTTTGG  
TTGGGTAAGTTTAAACACCTTTGATCAAGGTCACAAAAATACCACCTTCTTCAAGTAGAGTTTAAAGGGC  
AAAGTGTGATTAAAGCTCAAAGCTCAACAACCTTGGTGAGTACAAAGAGAAACAAGTGTGGGATTACAAT  
GATTTGGCTGTGGATTGGACCTTAGAATCAGAGCTAAGTATGGAAGGTTCAAAGTAGTCGTTTCAATCC  
ACCAATTGTGCAGTGTCTGCTTGTGAAAGTTCCTCTGATTTCTAATGGTAAACACCACTCTTTTAGTG  
TTACCAATGTAAAGTGGTCTTTCTTTTGGACCGTGATGCTAATGCAGGAAGAGCCTGATATACATTC  
CTCTATACTCTCTAAATCTTAGTTTACACAATCAATTTTAAACAATTTTTTTTCCATTACCTCAATTTAC  
ATAGTTGTATGAAGTGTACATGGATATAAATATATAAATAAACAACCTTAGATCATGTTATGTACCAC  
TTCTATTTGGTCTATTTCTTTTGGTGTATTAACTTCTGTTCTAGCTTAATCTAGCTTAATCTGATATGA  
TCAATATTATATATATAGTGCAGAGTTCATAAATGTGAATTCACACATACGCCGATTATATAGAATATATT  
CGATATTGATGGCGTCCCACTCAACCAAAAACCTAAAGTCTCAACCAGACATATAGGATGGTTTTCAAAG  
GGTATAAGAACTTTTTTTTTTAAAAAAAATTGACAATTTTAAACAACAATAATTTTTTTTTTAAATTATTA  
TTTTATTAAAAATTTATATTTCACCTTTTTTGTGATACAAAATTAATTATTTGAATGTGTAATAAAAAAT  
TGTATTTTTTATGGAGAATGAAACCAATACATTTAAACTTAATTTCTGTAATGTTATAAAGGTTAAAGA  
ATAAATTATTTAATAGATATTAATAGCTAATTAATAGAAATAGAAATAGAAAAACAACCTATAAATGAGG  
TTTGATATTATAAAAAATTTATTTATTTAATAATTAATAATTTTTATTTTAAAAATTAATAGTAAGTAA  
AAAAATTATGAGGTCTAGAACCCAGACTTCTCAGCTTGATAAAGAAATATTTGATGTTGACATGAATGATTT  
AAGAAGAAAAAATTACAACTGAATTTTTATGTAAACTAATCGTTTGAAGATGATATTGACTCATTTAC  
ACATCATTTTTTATTTTTATTTCTTAAGATGAGTTGATTTCAAGTTTATAAATTTATGTTGTCAGTTTGT  
AATAAAGCTAGAGAACCCCTCTATATGATAAGGATCAATATCATGCATTGGATTAGCATTCAATTACAAGA  
ACTAAACATTAATTTATATATAGGCTATATTGTTAATAATTTTAAAAATGAATCTAAACCCGCCACCC  
TTTTTGATAAATTTATCTGTATATATAAATAACTACTCAAGTTGTCTCATGTTTCAACTCTTTTTAGAAC  
AACCGAATGATATGATCTATTCTAAATATATATATATATATATATATATATATTTCAATTTGAAGATTCTG  
AATTGCTAATTTCTGTGGAATTTTTTTATAACTTGCTTGTGTTAACCGTTTTCAAATTAGAATGATTATC  
AAACAAAATTAACATTTAATAGATTTATTTTTTCAATTTTTAGGAATCAGTTTGAATCATTTATAAAAAAT  
ATACAAGCGCTAATAGGCAATGATTCATTATTTCAATGGACATTTAAATATATACCAGATGGGGTTGCC  
CTCCTCATTACGCGTAGGAAGAGACTAAAAATTTGTTTAAAGCAGATTCAATATCGTAAAAATAGATAAAAA  
GACCTAAAGTTCAAGGTAATTTTCCAAATATGCATATACTTTTAAACCAATTTATGCAATTTGGAATTTGC  
CAAAATATAAATTTAATATAATTTTACTATATTTTCTGCATATATATTTTAAATGTTTACTTGACTTAC  
TTTTAATGTTTAAATTTTTCTTTATTTCTTTCTTTTATTTCTATATTTTTCTCTTTTATATACCCA  
TTAAATTTTATATATATCTTTTATCTCTTTCTTTTCTCTAAATTAACCTTCTCCACGTTATAGAAAGATCCTA  
CTCCTTTATAATGATACCAAGACAAGTTAATCACTAGAAAAAGAAAAAGAGTTAACTAAGTATGCTGAGA  
TATGTTCTGCTATTTAAAGTCTTAGCATGCGGTGCTGATTTAATAAACCAATGATCAACCGTGCAAGT  
TTTTCAAACAGAAAAATGAAGAGAAAAATGCTCCCTAAACACACAAGCATATCCACACTTATTTTATGCCT  
ACTTGTCCATCCTATATAATATTACTAGGATATTAGGAAGCCAAGATGCAGAAAGTTCTCAACTTCTACAAT  
TATTAAGAATTGAATATCCAACCTTAAGCTTGACTAATTAATAATTAATAATATTTTTTTTATTTGAGA  
TTGAAGTGTGATGTGAAGTTTATTTCAATTAAAGTCCCATATTGAAAACTGAAAGAGAAAAAATATAA  
ATGCACCATTTGAGCCCAACCTTCTTAGATGCTGCCAACATATTTCTCCCAATTTGAGTAAAGCTTGA  
ACACAAGAAAGAGTGAATGAACACGAAATGATACCAACAATTTCTAATGCAATTTCAAATATATAATTTT  
TATAGTACTTTTATATCCTCAACGGAATTAAGGGTTCCATGTTAATCAAAGCTTTGAATAGTTCTCCAATC  
TTCATTACTCAGATTCAAACTCAAAAGTCAAGCTCTGCTACCTTGTATGTAAGCTTGTAAAGCAATCAACAA  
GAAAAAGCTAAGCAACAACATATACACCAAAACCATTAAACATCAACCATCAACCAATAACCCCTACAAAT  
ACCTATCAACATTTGACACATCAATCACATAAAGCTTCTCCTACCAATCATCACACACATCTATCCAT  
CACAAATCTCTCTCACCATGTGTTGCAGATCGGGCTTTAGCTTCTGTTGCTTTTGTGCTCATCTACAGCACA  
TTCTACATGTTTATGTTCTCTCACACTTCCCTCATCATCTTTTGGATAGTAATCTCACCTCAAGTGT  
CAAGTTCCATGTAACGTATGCTCCTCACACAATTCACCTCACAAACAACAACACCTTATATTACAACCT  
TGAAAGTCAACATCAGTTAGAAACCCCAACAATAACATCATAGTGTACTACAGGGGTATCACAGCAATA  
GCTTGGTACAAAGATAATGACTTTGGTTGGGTGAGTTTAAACACCTTTGACCAAGGCCACAAAAATACAAC  
CTTCCTTCAAGCAGTGTAAAAAGGCCAAAGTGTGATTAAGCTTAAAAACAACAACCTTGGTGAGTACAAAG  
AAGAGACAAGTGTGGGATTACAATGATTTGGCTGTGGATTGGACCTTAGAATAAGATCTAAGTATGGA  
AGGTTCAAAGTAGTCGTTTCAATCCACCTATTGTGCAGTGTCTGCTGCTGAGAGTTCCTTTGATTTCTAA  
TTCTAAAACAGCACCTCCTTTCAGTGTTACCAATGCAGCACTGGCTATTTCTTTGCGGATCGTGATGCAG  
GAGACTGATATAATCCTATATACCTTAAAGTCTATTGCAATCCATTTTTTTTATTATCTCAATCTGCAAA  
CTTGATATGGGTAGAATTTAATTTCAAGAGATCATTAAAGGTTATGGTTCTTCTTCAAGTTATATATATAT  
ATATATATATATATATATATATATATATATATATATATATATATATATATATATAGCCTCCTACCGCACTTTT  
TTTTCTTTTAAATTTTCAATCTTTCTTTTAAATTTTCAATCTGGGACCAACTAATAAATTTTGCGAGAAC  
GTATTTCTAAGTTATAGTAATAAATCTTAGTATCATAGTTTATTAATTTGATGAATATCTAATCACTAA  
TTTTTATACACTTCCACCGTACATCATTTCAACATCTTTTACTTTTCTTTTAAATCATAGAACATTT  
ATCTGTCACATCTATATATATATATATTTTTTAAATTTATAGGACGTATATACACCATTTGATACCCAATCC  
TTCTTAGATGCTGCCGTCCAGTTCTAAACATATTTCTCAATAGCGAGTAAAGCTTGAACACAAAAGAGG  
TGCTGAAGACGAAATGATACCAACAATTTCTAATACATATTTAATATAAATTTTATAGTACATTATATA  
TCCTCAACCAAAATTCATCAAGAGTTCTTGTAAATCAAAATATATATTTTATAGTGAAGAAATCACC  
GAAAAAGCTAAGCAACACACCATACACCAGAACCATTAAACCACGACCTTAACCCCTACAAATACCTGTA  
AACATTTGACACATCAATACATAAAGCTTCTCCTTCAATCATCACACACTACTATCTATCCATCACAAA  
TCACCTCACCATGTGTTGCAGATCGGGCTTTAGCTTCTGTTGCTTTTTCTGCATCTACAACACATTCTAC

|           |                                                                                                                                                                                                                                                                                                                                                                                                                                                                                                                                                                                                                                                                                                                                                                                                                                                                                                                                                                                                                                                                                                                                                                                                                                                                                                                                                                                                                                                                                                                                                                                                                                                                                                                                                                                                                                                                                                                                                                                                                                                                                                                                                                                                                                                                                                                                                                                                                                                                                                                                                                                                                                                                                                                                                                                                                                                                                                                                                                                                                                                                                                                                                                                                                                                                                                                                                                                                                                                                                                                                                                                                                                                                                                                                                                                                                                                                                                                                                                                                                                                                                                                                                                                                                                                                                                                                                                                                                                                                                                                                                                                                                                                                                                                                                                                                                                                                                                                                                                                                                                                                                                                                                                                                                                                                                                                                                                                                                                                                                                                                                                                                                                                                                                                                                                                                                                                                                                                                                                                            |
|-----------|--------------------------------------------------------------------------------------------------------------------------------------------------------------------------------------------------------------------------------------------------------------------------------------------------------------------------------------------------------------------------------------------------------------------------------------------------------------------------------------------------------------------------------------------------------------------------------------------------------------------------------------------------------------------------------------------------------------------------------------------------------------------------------------------------------------------------------------------------------------------------------------------------------------------------------------------------------------------------------------------------------------------------------------------------------------------------------------------------------------------------------------------------------------------------------------------------------------------------------------------------------------------------------------------------------------------------------------------------------------------------------------------------------------------------------------------------------------------------------------------------------------------------------------------------------------------------------------------------------------------------------------------------------------------------------------------------------------------------------------------------------------------------------------------------------------------------------------------------------------------------------------------------------------------------------------------------------------------------------------------------------------------------------------------------------------------------------------------------------------------------------------------------------------------------------------------------------------------------------------------------------------------------------------------------------------------------------------------------------------------------------------------------------------------------------------------------------------------------------------------------------------------------------------------------------------------------------------------------------------------------------------------------------------------------------------------------------------------------------------------------------------------------------------------------------------------------------------------------------------------------------------------------------------------------------------------------------------------------------------------------------------------------------------------------------------------------------------------------------------------------------------------------------------------------------------------------------------------------------------------------------------------------------------------------------------------------------------------------------------------------------------------------------------------------------------------------------------------------------------------------------------------------------------------------------------------------------------------------------------------------------------------------------------------------------------------------------------------------------------------------------------------------------------------------------------------------------------------------------------------------------------------------------------------------------------------------------------------------------------------------------------------------------------------------------------------------------------------------------------------------------------------------------------------------------------------------------------------------------------------------------------------------------------------------------------------------------------------------------------------------------------------------------------------------------------------------------------------------------------------------------------------------------------------------------------------------------------------------------------------------------------------------------------------------------------------------------------------------------------------------------------------------------------------------------------------------------------------------------------------------------------------------------------------------------------------------------------------------------------------------------------------------------------------------------------------------------------------------------------------------------------------------------------------------------------------------------------------------------------------------------------------------------------------------------------------------------------------------------------------------------------------------------------------------------------------------------------------------------------------------------------------------------------------------------------------------------------------------------------------------------------------------------------------------------------------------------------------------------------------------------------------------------------------------------------------------------------------------------------------------------------------------------------------------------------------------------------------------------------------|
| CrLEA2-36 | <p>ACCTTTATATTCCTCTTCACACTTTCCCTCATCATCTTTTGGATAATAATCTCACCCCTCAAGTGTCAAGTT<br/> CCATGTAACTGATGCCTCCCTCACACAATCAACCTCACAAATAACAACACCTTATATTACAACCTTGAAAGG<br/> TCAACATCACAGTTAGAAACCCCAACAAGAAGAGCATAGTGTACTACAGTTGTATACAGCAATAGCTTTGG<br/> TACAAAGATAATGACTTTGGTCTTTGTGAGTTTAAACACCCCTTTGACCAAGGCCACAAGAATAACACCTTCCT<br/> TCAAGCAGTGTTTAAAGGGCAAAGTGTGTTTAAAGCTCAAAGCTAAACAACCTTGGTGAGTACACAGAGAAA<br/> CAAGTGCTAGGATTTACAATGATTTGGCTGTGGATTTGGATCTTAGAATCAGGTTTAAAGGAAGGAAGGTTT<br/> AAAAGTAGTCGTTTCAATCCACCAATTGTGCAGTGCCTCGCTTGA<br/> ATGACTGGGAAGGACGAGTTTCTCTCGTACTCGCCCCCTCCCTCCAATCCAATCCATATTCTAATAACCC<br/> TAATCCTAACCTTAACCCTAACCTTACCATTACCCCCAAAACGTCGTCGTCTCTCTCTCTCTCTATCGGT<br/> CACCTTCCCTCCGTCGCGCTCGTCGCTGCATCCTCTACTCCGCTGCGCTCTTCATCTTCTCTCTCTCTGTC<br/> GCCGCGCTCTTCATCTTCTACCCATCCGACCCGGAGATCCGCTCGTCCGGATCCGACTCAACCACATTGG<br/> AATCCGAACCTCTCCGAGGCCAATTCTCGACCTCTCTTTCTCCATCACCCTCAAGGTTCCGCAACAGAGACT<br/> TCCTCTCCCTATCCTACGATTCCCTCTCCGCTCTCCGCTCGGTACCCTGGCCGCCAGCTAGGTTTCGTCACC<br/> TCCTCCGCCGCCGCCGCGCATTAGGGCGCGTAGCTCCTCTACGTTGACGCCACGCTCACCGTCAATGGATT<br/> CGAGGTTATCTACGATGCTTTCTACTTGTGCAAGACATCGCCAGAGGTGTTATCCCGTTTCGATACCGATA<br/> CTCGAGTTGAAGGGAATTTGGGGCTTTTATTTCTTCAATATTCCTTTGAAGGTGCCCTCATCTGTGAATTTCA<br/> GTTACAATTTATTTATTTTAAATTTCAATTTGATTTCTGAGTAGCTTGGGGTTTTTCCCTTGATTGTGTT<br/> CACATTTTCATAATTCGTTTGTAGATAGCTTGTGTTTATGATTTTAAATTCATTGACATGATTAATGTGAATG<br/> TTTTGTGATTTGATAGCTTTATATCTAAAAAGTGTATGCTCAATCCAGGCTACTGTGTCATGTGAAGTGT<br/> ATGTCATAATAAACAGCAGACAAATGTGACGTCAAAACTGCTACCCGTAGGTGAGGATTTTTGTGCTCTTC<br/> CATCATACCATAGTTTGGCTATTTCATTAACCATGCTCATGGACTCATCTTTTCATTTATGTATAGAAATTT<br/> AATCCTTTTGTGCTTTCATTTATTTGCTGAATTGCGCTACTTGTGTTTATGTGCAAAATGCAATGTACCCAT<br/> GTCCTTTGTATCTTCTGTGTAACATTTTCAATCTGTATTCAGTTTTATTTCTTTTACCATCAAAACAA<br/> TTACATCATGTTGGTTACGTCTGAACCTAAAAAACAATTTGTGATCTTTTGAAGCTATTGAAGGACACT<br/> AAAAGAATAAGTTATTATTTCTTCAAAATAAGCTAAGCCAAACATGCACTTGCCTTTGATAACCTTAGATG<br/> GTTACATTAGCCACCCCTAATTTGTAAAGAGAGTTAAACCTCAGGGCGAAGCCAATATGAAAAAAGATGGC<br/> CAATATTGAGCAGTCCTTTCTTTGTTAGGCTAGAAAACCTGCATTTTCGGGCATTTTATGCTATTGCTTGT<br/> TAGCTGGAACATAACAAAGAATTGAAGCGTTTAGTTTTACTTTAAATCATGTGCTTGCCTTCTTCCGTC<br/> ATGTTTTGAAGATACAAACAAGCAAAAGGTATAAAATGTTGCCATACTATATGTAGCAACTATGTATATTA<br/> ACACGAGCACTTATCTTACTTTCTTACCATAGAAATCTTGTGTTGCTTAGCTATAATGCATAACTTATGTT<br/> CTAATACCCAAATAAGAAAACAGAAATGTTTGAGAAACTGCTTAAATTAACCTTAAATTAATGCTTAA<br/> GATTCCTCTATATGCAAACTTGTGATCATTTGAGCGCATCATTTTCATTATATAGATTGAACACATTTGA<br/> TTCACACTTTGGTTGTAATTTGTAATTGGAAGTAGTATAGAATCCTTTTCTTTTCCCTTCTTTATATGC<br/> TATGATATTTTGTGCTGGCCATGTTTGTAGTTACTCTTTATTTCACTGGCTAATCTATTGCTTTTCTAGCTGCAT<br/> GCTTGAACCTAGAGATACATTTCTATAAACTGTTTTTCTATGGCTCTAAGAAATCCCGCATAACAGACT<br/> TAAACCTTAATGAATATATCGTGCCTTATTAGGTAGGAGCTTATTGGCTTAAATATGATCTTCTTTCTTA<br/> GAAATTAATCCTGGAATACTGTGTCGAGGGTTTGTGTTTTCATAGACCTCGGCACCATTTCATCTTCAT<br/> CTACAGTTGCTTTTATGAGGTGAGTTAAATTTATGCTATTAGCAGTTCGTTTCTCTACTTTCAAGTTTTG<br/> GAAATGCAGATCATCTGGCTATTAGGTTTTGTTTTATAATTTAACTATTTTATAATGCATGTTTTTCAAT<br/> TAATATATATAGAATTTGCTAATCATTATTCATCTGCTTCAGTCACTGGGTGATCCGCTGGATCAGAGCA<br/> CATATATTGGAGTTGCAGATACATGA<br/> ATGCACGCCAAGACCGATTCTGATGTCACGAGTTGTGATCCATCATCGCCAAGATCTCCAAAACGCGCCGT<br/> TTACTATGTGCAGAGTCCCTCGAGAGAGTCTCATGATGGTGATAAATCTTCTCTATGCATGCCACTCCAG<br/> CATGTAATAGCCCCATGAGTGCACCTTACACCACTCGTATGGTCAACCTTCAAGGCTTCTTCTCGAGC<br/> AGGGTCTCCGGTTCTTACAACCTCTTCTTGGGGAAGGAAAGGGGACCGTAAACGCAATGATAAAGAGTGGCC<br/> TGAATGCAAGGTGATAGAGGAAGAGGGTGTAAATGGTGATTTTACCCTGATAATAAAGGCTTCTCAAGGA<br/> GGACTCAGATCTTCATTGCTATGATTGGTTTTGTCTTGATTTTCGGTGTGTTCTGTTTGATCATTGGGGT<br/> GCTAGCAGGCCTTACAAACCTCAACTCAGTGTCAAGGTATAGTTAGATTTTCTGTTTTTCTGTTTTTATCAGG<br/> AATTTCCACTTGCTTTACATTATTATTTATTTTAAATAAACAATGGTTGACTTAGAAAGGTGTAGAA<br/> TAATATCTTGTCTTGTGATTGTTAATCGGAGAACAAAGCCTTTTATTTTAAATATAGTTAAAGAAA<br/> AAGATAGGGGATTGAGATGGGAAGACTATGAATCAGAACCTAATATGGTGTAATTTATAAAACAGGACTTG<br/> ATAGTTGAAGTCACTCTGGGTGACAGAAATTTGTAGTGAAGACTGAAGAGTCAACCAATCGATTTCATTC<br/> GGAATTCAGTGATTTGAAAGAAATGTGCGCTATAGATTTTCTGTTGTCATTTCAGTTTCAATGGTGACAC<br/> AACCATGCAACTTGTGACTCCTTATTGATTCTTCTATTTTATTTTAAAAAATTCCTCCATTTTCT<br/> ACCTGACAATTTAGAATTGCTTGTCTTCTCCCATCTATCTTCTATTGGCTATATGTTATCGATGCAAGGAGA<br/> AACAAGTTCTATTTTCTTTTGGAACTCAAACTATCATGCTTTTATTATTCATCTTGAATTTCTTTTACAT<br/> TATTAATGAACCTTTCCAGTGAGCCTGATGATTCACTTTTCCAGAGTTTGACAGTACACAACCTTCTACTTTG<br/> GAGAAGGGACAGACATGACAGGAGTTCCAATAAGATGCTGACAGTGAATTGCTCAATGAGAATGATGGTG<br/> CATAACCCCTGCAACCTTTTTTGGCATTCATGTCAACTCCAAGGCAGTGAGTCTTATGTATTCTGAGATCAG<br/> AGTTGCAACTGGTGAGGTAAAGAAATTAATCCCAATTTCTAACACTGACCCCTACTCTCATTTAGGCTTTGTT<br/> TTTTGTTTTATAGTTGGAGAATCAATTTCTATCACTTTTCAATAAAAAACACACATACAAATGAAAATATATT<br/> GTTAAGATTAAATTTATGCAAGCATTTCATCATATTTCAATGGTTCAAAATCAATTTCTACTCAACTTTAAA<br/> CCAAACAGGTACTTATTGTGCCTCTAATGTTGACAATGATCGTCACTCCTACTGTTAAATTCCATGTGCAG<br/> CTGAAGAATCATTATCAGCAGAGAAAGAGTGCAGGACAGTGTGTTGTGAACCTGCAAGGAAGCAAGGTTCC<br/> ATTATATGGTGCTGGTGCAAGCTTAGCTGGTTTGGTGGACAAAGGAAAAATACCAATGACGCTTGCTCTTG<br/> AAGTAAAGTCACAAGGGAATGTTGTTGGGAAGTTGGTGAGGTCCAAACATAGACAGCATGTTTCTTGCTCA<br/> GTGGCTATTGATTCCCAACAACAACCCATCAAACTCAAAAACAATGCATGTACATACGATTGA<br/> ATGAAACAGAATACAATAGGATCAAAAATTTCTTGTGTACACCTGCATTTGTTTTTCCCAAAAAACAAGA<br/> TTTTCAAAGGTAATCCCAATTTGTTCTTATTACCCGGAACCAAGAACTATGGCTAAAAAGAAACCTCAAAATCT<br/> GCATTTCTGTGCTGCGAGTTTCTTTATAATTGTGTCATCACTGTGTTCTGACCTTAATTTTGACCATATTT<br/> AAACCCAAAAACCCAGATATATTTCTCCACCCCTGTTGACCTCAAAAACCTTTCAGTTATTGTCATCCAAATTC<br/> AACTAATGCACCACTAGGCATGGGTGTCACAATAGTGAATCCAACTATGGAAGCTTCAGGTCAATAAAT<br/> CCACTGGTTATCTTGAATATCGTAATACTACAGTAGCCAAAGTTCCTTTGGAGACAAAATCTGTTCTCTGCG<br/> CGTACCAGGACCAATGTGAGCACTTCTGCAGGTATTATGACAGAAAAATGATTGATGATCCAAATTTTG<br/> GTCAGAAATTTGAAGTTGGGACCTTCAATTTGACAGCAAGGCCAATGCTGGGAAAGTGAGTATGTTCA<br/> ATATTTTCAAGCTTAAGGCCACGGTTCATATTTTCATGTGATATCTCTATTAACATAATTGCTATTGATTCT</p> |
| CrLEA2-37 |                                                                                                                                                                                                                                                                                                                                                                                                                                                                                                                                                                                                                                                                                                                                                                                                                                                                                                                                                                                                                                                                                                                                                                                                                                                                                                                                                                                                                                                                                                                                                                                                                                                                                                                                                                                                                                                                                                                                                                                                                                                                                                                                                                                                                                                                                                                                                                                                                                                                                                                                                                                                                                                                                                                                                                                                                                                                                                                                                                                                                                                                                                                                                                                                                                                                                                                                                                                                                                                                                                                                                                                                                                                                                                                                                                                                                                                                                                                                                                                                                                                                                                                                                                                                                                                                                                                                                                                                                                                                                                                                                                                                                                                                                                                                                                                                                                                                                                                                                                                                                                                                                                                                                                                                                                                                                                                                                                                                                                                                                                                                                                                                                                                                                                                                                                                                                                                                                                                                                                                            |
| CrLEA2-38 |                                                                                                                                                                                                                                                                                                                                                                                                                                                                                                                                                                                                                                                                                                                                                                                                                                                                                                                                                                                                                                                                                                                                                                                                                                                                                                                                                                                                                                                                                                                                                                                                                                                                                                                                                                                                                                                                                                                                                                                                                                                                                                                                                                                                                                                                                                                                                                                                                                                                                                                                                                                                                                                                                                                                                                                                                                                                                                                                                                                                                                                                                                                                                                                                                                                                                                                                                                                                                                                                                                                                                                                                                                                                                                                                                                                                                                                                                                                                                                                                                                                                                                                                                                                                                                                                                                                                                                                                                                                                                                                                                                                                                                                                                                                                                                                                                                                                                                                                                                                                                                                                                                                                                                                                                                                                                                                                                                                                                                                                                                                                                                                                                                                                                                                                                                                                                                                                                                                                                                                            |

|           |                                                                                                                                                                                                                                                                                                                                                                                                                                                                                                                                                                                                                                                                                                                                                                                                                                                                                                                                                                                                                                                                                                                                                                                                                                                                                                                                                                                                                                                                                                                                                                                                                                                                                                                                                                                                                                                                                                                                                                                                                                                                                                                                                                                                                                                                                                                                                                                                                                                                                                                                                                                                                                                                                                                                                                                                                                                                                                                                                                                                                                                                                      |
|-----------|--------------------------------------------------------------------------------------------------------------------------------------------------------------------------------------------------------------------------------------------------------------------------------------------------------------------------------------------------------------------------------------------------------------------------------------------------------------------------------------------------------------------------------------------------------------------------------------------------------------------------------------------------------------------------------------------------------------------------------------------------------------------------------------------------------------------------------------------------------------------------------------------------------------------------------------------------------------------------------------------------------------------------------------------------------------------------------------------------------------------------------------------------------------------------------------------------------------------------------------------------------------------------------------------------------------------------------------------------------------------------------------------------------------------------------------------------------------------------------------------------------------------------------------------------------------------------------------------------------------------------------------------------------------------------------------------------------------------------------------------------------------------------------------------------------------------------------------------------------------------------------------------------------------------------------------------------------------------------------------------------------------------------------------------------------------------------------------------------------------------------------------------------------------------------------------------------------------------------------------------------------------------------------------------------------------------------------------------------------------------------------------------------------------------------------------------------------------------------------------------------------------------------------------------------------------------------------------------------------------------------------------------------------------------------------------------------------------------------------------------------------------------------------------------------------------------------------------------------------------------------------------------------------------------------------------------------------------------------------------------------------------------------------------------------------------------------------------|
|           | GGTTCCACCTGCGTGGCCAACTCAAGTTATGA                                                                                                                                                                                                                                                                                                                                                                                                                                                                                                                                                                                                                                                                                                                                                                                                                                                                                                                                                                                                                                                                                                                                                                                                                                                                                                                                                                                                                                                                                                                                                                                                                                                                                                                                                                                                                                                                                                                                                                                                                                                                                                                                                                                                                                                                                                                                                                                                                                                                                                                                                                                                                                                                                                                                                                                                                                                                                                                                                                                                                                                     |
| CrLEA2-39 | <p>ATGTCTAGCAAGGACTGCGGCCACCACGAAGAGGAGCGCCGGCAGCTTCTCCGCCGCATAGTTGGTGCCAT<br/>CGTAGCCTTCATAGTCTTAATCCTCCTCATATCTTCTTAATCTGGATCATCCTCCGACCCACAAACCCCC<br/>GATTCATTATCCAAGACGCCACCCCTCTACACCTTCAACTTCTCATCCACCTCACCCCTCTGTAACCTTCCCCC<br/>ACACCCAACATCCTCACCCCTCACAATGCAAGTCAAGCTTGC CGCACACAACCCCAACCCGATCGGCAT<br/>TTACTACCACAATCTCTATGCCTATGCCTCTTATCGTAACCAACAGATCTCCCTCGCCACTTCCATTCCCA<br/>ACACCTATCAAGGCCACAAGGACTTCATCATTTGGTCTCCGTTTACCTACGGTAACGCCGTTCCGGTTTCG<br/>CCGTTTCTGTTGAGTGCTCTGCAGCTCGACCAGAGTACCGGTACCGTTTTGGTCAACGTCAAGGTCAATGG<br/>AAGAGTCAAGTGGAAGGTTGGGACTTGGATCTCCGGGAGGTACCATATTTATGTCAACTGTCTCGGTATA<br/>TTAGGTTCCGCCGAGATCGGAGTAATGCCATCGGCGGGGTGACTCCGGCGGTGAAGTTTCAGCTTTTGCAG<br/>AGTTGTAGTGTTGATGTTTAG</p> <p>ATGTTGAGCAACATACTTACCTGGACGGGGCCAATGGGTGATCCAGAAGGCCTATGGCCTAGGGAAGTAAC<br/>CTCCATTGCACCTTTGGAGGGGTGCTTCTCTAAGGTCTGCTCAAGTAGCAGAGCCTACGTCATAATTGTGG<br/>CAGTGGGGGCTGCGTTTCGCGCGGGCCCTACCTTGAAAGTTTAAAAATTTGTGTAATTTATTAGATGTGTT<br/>ATTAAGATATTTATTATGTTTAAATTAATGATTTATATGATTTTCAACTTTATTTTGTTCAAAGTACAAT<br/>AAGCAGCCTATTAACACTACTTCAACGTTTTCTTTTCTAAAACCTACTATAATTAACAAAAATTTAAT<br/>ATAATTTGATGTGGCAAAATATTTAAAAATTTGAAACTGAAATTTAATTTGACAGAAATACCTACTTT<br/>AATTTTGTGTGTTTTTAATTTTTTTTCTTCTAATAAATAATAAGAAATAAATCATTATCTGTATTTTT<br/>TTACACCCTTGGAAAGAAGACAACAGTTTGGGATGAGTTGCTTTCTTCACTTGAATGAACGTTGAAATTTG<br/>ACTCAGGAGCACGTGGTGTTGATAAAAGTGAGGGCGTTATCGTAAATGATAGATCTCCGTGTGATCTTT<br/>GGTCTCAATGTCTCTCATCTTCTGTAATATCCCCCACTCATTACAGCTTCTGATCTTCCAAGTCGGC<br/>GATGGGCAAAAAGGTAAATGGAGTTGGAGCTCGGCGTTTGTGGGAGCAGCCTCAGCGGTAGCAGCAACAG<br/>CGATACTATCAGCGAAACCAAGGACCAACTTTTCACTCATATCAATCAATTTCACTTCCCTCAAGCTC<br/>AACCTCCCCCTCCTCGACGAGAGCTCCTCCTCACCGTCCACGTACCAATCCCAACATCGCTCCGATTCA<br/>CTACTCCTCCACCACCATGTCTATTTTACGAGGGTTCTTCTCCTCGGCTCAGGTTCAAGCGCGCT<br/>CACAGCCTCCGCGTTCTTGGCAGCTCCTCCGCTCCCCGCTCGCCTCCATGCGCTGCAACTCGCTCACCAC<br/>GCCACTCGCTTTGTTACAGAGCTTGC CGCGCGGAGATGGTCCTTGACGCGCTGTTGATATTGCCGGCAC<br/>CGCCAAGGTTCTTTGGTGGGACCACAACCTCAAGGTCCACGTGGATAGCCGCTCACCCTCGATCCCGTCT<br/>TTCTTGACGTCAATTGATCAGGAAAGTACCTCGGAACCTTGAAGTCTTCAACCGCAGCGTAA</p>                                                                                                                                                                                                                                                                                                                                                                                                                                                                                                                                                                                                                                                                                                                                                                                                                                                                                                                                                          |
| CrLEA2-40 | <p>ATGGGAGGAAGAATGCACACTAAGTCCGACTCAGAGGTACCAGCAACAGCATCGACCCTCATCTCTGTC<br/>GCCGCCGCGTTCCCCCTCCCGCGCGGCCACTCTATTACGTCCAAAGCCCTTCAAATCATGAGGTTGAGAAGA<br/>TGTCTTACGGTTCAAGCCCCCTCGGTTCCCTCACCACCATATCCATTACTACCTCTCTTCCCCCATTCAC<br/>CATTCGCCGAATCTCCACCTCTCGTTTCTGCTTCTCTCAAAAACCTCGCCCTTTCTCTCTCTCTG<br/>GAAGAACTCCACCTCACCCTCACACGCGCTCGACGACGAGAAGACGACGACGACGACGACGACCTTCACG<br/>ATTCTCCCGCAACCTGCGCTTGTACCTCTGCTTCTTCTGCTTTTCTGCTTCTGCTTTTCACTCTATCTCT<br/>CTCATCTCTGGGCTACAGCAAGACCTACAAGCCTCAACTCGCTATCAAGGTAAACAACAATAACAAT<br/>AAATCAATATTTTTTCTTTCCCTTTGCTTCAATTGCTCTTTAATTAATGAATCATCTGTTGGTCTCCG<br/>ATAATACGATCATGATTAATTTCTAAGAATTGAATTAATATTTGTGGGGCCTCCTTGAACAAATAAATTT<br/>TTTTTGTACGGGAGAACAGAGCATAGTGTTCGAGAAGTTGAACGTACAATCGGGAACGATGGAACCTGGG<br/>GTGCCAACAGATATGTTATCGTTGAACCTCAACGGTCAGAAATTTGTACAGAAATCCTGGCACTTTCTTCGG<br/>TGTTACAGTCACTTCCACACCTCTTCAGCTTACCTATTACCAGCTTGCACTAGCCCGGGTCAGGTATATA<br/>TTTTCAATTAATTAATTTCTTATTCCTATAAAAATACATTTCATGCTTGTAGTGAGTCTCGGTTTCTGTA<br/>GAAAAAGTTATATAGTTTAAAGTGTGCTTGTTTTAAAGAAAAATGAAAGCAAAGAAATGAAGTGAGGATT<br/>GAAGGGTACTTATTGATGGTTTCGCAACGGCCAAAGGTGGGGACAAATAGGTGGGGACAAATTTATCGCATC<br/>GATAATCAGTCTGTGGGAGCATCCACAGGCTTACTGAACAACCTCAATTTTATTGGTCCCTCTTTATTGGAC<br/>TCTGTCTAAAAGCTGCCACCTGCTTCTCTTCTACATCTTCTTACGTGTGGGGACCCCACTAACACG<br/>CTTCACACTTCACACCATTTTTTTTAAATACAAATCTTTATGATTCTTTTCTTTTCTTTTCTTTTCTATCAAT<br/>TGCCATTTCCACACACACTTTATTGCATAGACATTATACAGCAGCTCGTGGTAACCTGGTAACCTGGTAAC<br/>GGCACCCTCAGCTGACTGACTTTACATTAATTATTGCATTACCATTAACCATTAACCTTAACGCGAATT<br/>TTCATGAGTTTATTGCCAATAAACAACCTGTTTAAATTTTTCAGTACTCTTTTTCATTTTAAACATCTATAAC<br/>CAATGTGGATAATCCCGTTACCCACCACACTCCACAGACATTCGAAGTCTCCGCTGCACCAACACGCTTC<br/>AACCGCGCTCCTCTACCTACTGCATTGTTTAACTGCTCGCTGTATCACAACTTATTGTTCTTCGAATAT<br/>TTTAAAAAAAATATATTTTTTAAATTTTTCTCCCATACATATCTAAAACCGTACATTTCAAATGAAGA<br/>CATACAGCTGTTATTTGATGTTTTCACAAACATGTTTCATATTACAAACTTCAATAACCAATCATGCTCA<br/>TTCATAGCGTAAGTGATAATAATTCCTTGAGCTTTCTAGATACGGCATAGGGGCATTCTTTTTCACAC<br/>TATTATATAGTCTTGAATTTAACAACCTTTTACGATTTTATTTACAGAAAAATTTATGATAATTTTTTT<br/>TTTTTGAATAATTTGCTTAGAAATATATTGATTATTAATTTCTTTTATATTCTCATTTTATTATGAAC<br/>TTATGTTAAGAAATATTTATCAACTTATGATATTATCAATTTAAATATTTATATTATGAAAAATTTAG<br/>AATAAAATTTGAATGTACAACATATTAATATTTTACTACTTTTCTCATACGCTTGATAAATAATTAGAG<br/>AGAACACAGAAGTAAGAGGATTAGGTGGAGAATATAGCATGTTTTGTTGGATATTTGGGATGAAGATCATT<br/>ATGCGTATGCATTGTTAGACACAGTAGAAGGGGTGTAGTGATCTCTGCAACAGTTGAAACGGTTGTGCT<br/>TGTTGAGGACAGTTATTCTGTATTATAATTAGTTTTTCTTATCTGGTAAGTTCCCTTTTGTCTCTCT<br/>TGCGTGTGCTCTCTCTTCTTGTGTACATAATACCTTCTGTATCTCACAAATAACATGAATGAAAGTTCA<br/>TTCTTCTTTCTCAGCTATGATATTATGCTAACAGGGGACACTCTGCATTTGCAACATGAACCTGTTGATG<br/>GTACTAATTTGACAAGATTTTATTTTCTACTGGCTAATAGATGCAGAAGTTCTATCAGTCAAGGAAGAGT<br/>CAGCGGAAGGTAGTGGTGGTGGTGGAGACACAGATTCCGCTCTATGGTGGAGTGTCTGGCTCTTCTGG<br/>AAATTATAAAGAGCATATCGACAGTGTGCACTGCCACTGAACCTGACATTTGCAGTGAGATCAAGGGCTT<br/>TCATCTTGGGAAGATTGGTTAAGTCTAAATTTCTATCGAAGAAATCAGATGTTCTGTCACTTTGCATGGCAAC<br/>AAACTTGGAAACCTCTTAATTTGAAGGATTTCGTGTGCTACAAGTGA</p> |
| CrLEA2-41 | <p>ATGTCATCTGATCCTTATGCCCCATCAAGATATGCTCCTCGCAGAACCAAGGCTATGTATCAGGGCCTCC<br/>TCCTTATGGGTATGGCCGTAAGCCTCCACGTTACCATCACCACAGTGGTTCTGGTTGTTTATGTGGATGCC<br/>TAAAGTTCTTCTGTTGCTGCTTCTATAGTTGCTGCGGTGCTGTATTTGCGCCTTCTTATCTTCTATCTC<br/>ATTTTGGTGATCATTATTAATGTTTATATATCTTCTTAAGCCTGACATACCTTCTCAATATTTCAAGG<br/>AATTGATATCAACACTTTTGATTTAAAAATTTGATAATAAGCTCTTTTCTAATATTTCCATTGTTGTGAAAG<br/>CGGATAATCCAAATGAAGGATTGGGTTGAATTTTAGATAATGAAGTTAGGTTATTGTATTCAGGGTCC<br/>CAACTTTGCTCTGGGGCGTTCCCTCCTTTCTTGCAACCAGAGAGGAACGTAACACGTTCAATGTAAACATT</p>                                                                                                                                                                                                                                                                                                                                                                                                                                                                                                                                                                                                                                                                                                                                                                                                                                                                                                                                                                                                                                                                                                                                                                                                                                                                                                                                                                                                                                                                                                                                                                                                                                                                                                                                                                                                                                                                                                                                                                                                                                                                                                                                                                                                                                                                                                                                                                                                                                                                                                                                       |
| CrLEA2-42 |                                                                                                                                                                                                                                                                                                                                                                                                                                                                                                                                                                                                                                                                                                                                                                                                                                                                                                                                                                                                                                                                                                                                                                                                                                                                                                                                                                                                                                                                                                                                                                                                                                                                                                                                                                                                                                                                                                                                                                                                                                                                                                                                                                                                                                                                                                                                                                                                                                                                                                                                                                                                                                                                                                                                                                                                                                                                                                                                                                                                                                                                                      |

CrLEA2-43

TTATGCAACAAATCTGTGTGTACCATTCTTTATCATCACAAATTTTGTGAAATTATAAAATTTTATAATACAA  
ATTATCACTTATTTATATCCTATCCAAAAATAAAATTTAAATATATTATATAAAAAATATAAGATTTTAAAAAT  
AAATTAATAATATTAATATTAGATATAAAAAATTTAAATTTATATATAACATTCTACCGTCCAATATTT  
TTAATATTATAAAAAATTTTATGTTTAAATCCTATGTCATCTTAAACTCATATACACATAAAGAATTAATAA  
TAATAATAATATTTTATTTAATTTATTAATTTTATACCTTTATGAATTTTGTCTTCATCGAAAAATTAA  
ACCTTTCCTAAAAATTTTAAATCTTTTTTTTTTAAATTTCTTTTCAAGTAAAAATAGTCAAAACTATTTTT  
TTCAAAATTTAATTTTAAATTTTAAAAAAATTTCTTTCAAATTTTAAATTTATTTTCTAAAAACAAA  
TTATATTTCTAAATTTTAAATTTTAAACAAAATTTTTCTAGGTTTTTCAAATAATTTCTAAACAAAATCA  
AATTAATAGAACTATGTTGAATCTTAAATTTCTATCAAATCAGAAAATATGTAAGAATGAAATAAAAATA  
AAAACAAAATTTTCAGCACTATTTATATATATATATATTATATATAAATAAATATATATTATAAATATTTA  
AGCGTTATATATAAATATTAAATTTTTTTTTTAACTACTCATTTAACATTAGATACCGTTCTTCCCTAAGA  
TGATGCATCTATTCTTCTTAAACAAACTTTCAACATGATTTAAGTTGCAATAAAAGAAAATACTTTTTGTAT  
TTTTTAAATAATTTTAAAGAAGATCAGCATACACTTTTGCACAAAATTATTTCAATAAATCTTTATATTTT  
AAAAAATATATAAATATAAATGTACAAATTTAATTAATTTTACTTGTATCATGCAAACTTAAAAATATATTT  
TTTTAATTTTTTTAAAAATAAGAATATTTTAAATTTTTTAAATGAAAGTTAAAAAATATAAAATGTACAC  
TAATAATATATAAATGGAAATAATTTATAATAAAAAATAAATAAATTTAACAACAAATATATCTATCTTT  
AAAAGGTTTAAATCGAACTTAAAAATAACTTAGGAGCATCCTTTAAAGATAAAATTTATATGTTTTTTTA  
TATTTGTTTTTATGCTATCTTTAAATTTATGAATGATATTATATAAAGGGATGAGAGGTTTATTCTAATGA  
AATTTATAAATTAATTTTAAATTTTAACTTTTTTTATATGAGACTTCTTTATTACTTTGTACATTGTT  
TTCATTTTTTATTTTAAACATATAGATAAAATTAATATTGACTGTTGATTGATTGATTGATTGATTGATTG  
TAAAAAATTAATAATTTTTTAAATAAAATTCATATCTAATATAACGTATAAAGATTGAAAAAATTTCTT  
TTCCAAATTTAACTTAATACCTACCGAGTAGTGTGAACCTTAAATGAGTAAAGTTGTAATTTTTTTTTTT  
CAAAAAATTTAATTTATTAATTTATATTTTAAAAAAATAAAATTAATAATTTATATAAATAAATACTAAT  
TAATAGGAGTAACATAATTTTTTTTTCTAAAAAAAGATGCTCATTTTATTTATTTATTTTCTTTAAAT  
ATTACTTATGTTTGTCTTTCACGGGTTTAATATTTGTTCCATAGCCATGCGCCTCTTAGATTCTGTTTTTT  
TTTTTTTTTTTCATTTTTACTTGATAACTAAAGTTTACAATTTATAGTATTTTTAGAATTAAGGGGAG  
GAGATTCGAATTTAAATCTTATGTAACCTGTATTAATCTTTAATTTTTTATTATAGAACAATTTTATTAAT  
CTTACGAATTACTGTTTAATATTACAAAAATAACAGCAAGAACTCAACATTTGACTTTTAAACATTTATCT  
GAATAAATAAATAAATATGTAATAATTTAGTATCTCATTTCAATAGACGAAAAAGAAAAGTAAAAATTTTA  
CTAAGAGTTACCACACTTTTCATCTATGGGTGCAATTTTATTTTACAAGTGACAGTTTTATAATTTCTAAG  
CTTTCCCAAATTTTGAAAAAGAAAAAGAAAAATCAACATCGTGGTGTTCATCATCCTGTGAGACTGAGGAT  
GTTTGGATGTGAATGTGCATGAATTAATAAACATTGATACAAGTCCTACTCTTGGAAGCATTAAAAA  
ACATGGATAGGATGAAAATGAATGCACCCGAATCCAAGTACACCATATAATAACAAAACGCAGTGGAAATTT  
CTTAATGATTTTTTTTTTATTTGTTTAGTTTGCTTTTTGTTGATGCTAACCTTGCAGAGAACAAACGTAGAA  
GTGTCAAAAATGATTTAATTTTATAAATAGGTTTGGTGTATATTTCTATAAATCTTTTGTGTCTTACAA  
AGTATGTATTAATTAATAAATATATGTAATTTTATTTTAAAAAATATGAAAAATATTTAATACTTTCTCTA  
TTTTAATAAATAAATAATGATTTTCAAACCTTAAGAAGAAGATATTTACAATAGAAGAACATTATCCACATA  
TTTTTAAATATATTTTAACTTTTTTCATAATTTGATGATTAGTTTTGTTTTAAAAAGTTAAATAAATTTTAA  
AAAGTTAATTAACATAATTAATTTATATTTAATTTTTTATCAAATTTATTTATTAATAAATAATTTATTA  
AATAAAGAATAAGTATGTTTATTAATATTTTTTTATATATTGCGAATTTCAAACCTTTACATTTGATGG  
TGCCACTTAACATTTTCGTTTGAATAATTTTTAATTTTAAAAAATTAATAAATTAATTTTGTCTTAAATTTT  
AATTTAAATTTTTTACAAAAAATAAATAATTTTATTTATTTATAGTTTTATATAAAGTATAAATAAATAAT  
TAATTAATAAATAAATAATTAATAAATAAATAAATTTTAAATTTTAAATATTAATAAATAAATAATTTATTT  
TATTTGCTATGATAAATAAATAAATAAATAAATAAATAAATAAATAAATAAATAAATAAATAAATAAATA  
ATAATATAAATAAATAATTTAATTTATATAAATTTATATTTTATATATTTTATATTTGATTATTAATATTTAAAT  
ATAAATTTTATGATGTTTATTATAATATTTTTATATTATTTATAATATTAATAAATAATTTATATAATATA  
AAATTATATTATAAATATTATAAATTTAAAAATAATTTATATTACTTATTTTTTAAATATATAAAAAACAGATAA  
ATAAAAAATAATTTTTTTTAAATAATAAATAAATAAATAAATAAATAAATAAATAAATAAATAAATAAATA  
TGATTATAATACAAATGATATTATTTATAAATTTTGTATTTTATATATTTTATAAATACATTTATAAAT  
ATATAATTTATATATATGTAATATTTATTTATATAAATAAATAAATAAATAAATAAATAAATAAATAAATA  
ACATAAAATTTATATTATTTATTTAATAATTAATAAATAAATTTTATATATTAATTAACATAATTCATTGATAA  
ATTTTTAAAGTAATAAATAATTTTATTTTAAAAATAAATAAATAAATAAATAAATAAATAAATAAATAAATA  
ATATTATAAATAATTTGATAATGATAAATAAATAAATAAATAAATAAATAAATAAATAAATAAATAAATAA  
TATAATATAAATAATTTATGTAATTTATACAAATTTTATTTATATATTTTAAAAATAAATAAATTTTATATT  
ATTTGATATTTTATTTATATAAATAAATAAATAAATAAATAAATAAATAAATAAATAAATAAATAAATAA  
TAATATAAATTTTATATTAAATATTAGTTTTTTTATTTATATAAATAAATAAATAAATAAATAAATAAATA  
ATTTATTTATTTTATTTATTTAATAAATGATGGTTAGTAATAAATAAGATTGGATAAATTTAAAGTAATAATA  
TTTTAAAAATAAAAATAGTATTTAATAAATTTTTATTTTTATGATTTAAATTAATAATTTTAAAAATAT  
GTTAGAAATTTATTTAAATTTATTTACCAATGTTTAAATTTAAAAATTAATAAATTTAAACTTACGATCAT  
TCAGGATTTACATAACTAATTTAATAATTTTACATATTACAATAGAAATGTCTTACGATTTATATAAAAA  
ATTTATTTTATATATGGAATTTTACACTTTAAAAATAAATAAACCAGCAACGCTTCTACTTTAATCTTTAT  
AAAATTAACAAAAAATTATCCCATCTAAAAAATTGCTTTGTCCTCGGAATTTTACCTTTTCTCAAAGTCA  
ACTTTGCTTGTAGTTAGGGATTAGAACTTGTATGTAAGGTAAAAAGCATCTTAGAAATTTCCAAATTA  
GCTGCAATGAAAAAATAAATAAAGGTTAACGTTGGTATCAAATTTATGTAATTAATAATCAAAATTTGTG  
GGTTAACATATAAATAAATAAATAAATAAATAAATAAATAAATAAATAAATAAATAAATAAATAAATAAATA  
ATTTTAAATTAACATTAATATAGTTTAAATTTAAATTTTACAATAAATTTGATATAATTTAAATTTAAAT  
TAATCTAAACGATAAGTTACATTTATCTAGATCTTATATTTTTTACTGTTGCATATATGCAAAATACAATA  
AGATAACATATTTCCCTTTGAACATATAAATACTGGCTCATAAATAAATAAATAAATAAATAAATAAATAA  
ATGACTGTTTAGTTTTGTAAATATAAAGATGTCCATGCTACAATCTTGCATTTTGTACTTCTAAACTAAAA  
ATCTTGAATAAATCTCCAATCCAATTTGAGCCTAATTGAGACAAGCCATTCTTAACTGGTCAAGTTCTT  
TTAATTAAACTCAGTTTCACTGCTCAAGCAAGTTAAAAAATACTGGATTCTCAATTTATACATTTTAC  
ATTAATAAATAAATAAAGAAAAATGATTCAAATTTAAAAACGTTAACAATAAATAAATAAATAAATAAATA  
TTTTTCATAAATAAATAAATAAATAAATAAATAAATAAATAAATAAATAAATAAATAAATAAATAAATAAATA  
TTATGTTATAAATTTAAGATATTTTTGGTGACACAACAAATTATGTAACTTTATGTCCCGTTATTTTA  
GAATTTTATTAATGATTTTTAAATATCTTATCATTTATGTTGATAAGCAGTTTTAATTTTTTTAATATTAT  
AAATATATTTGATAAAGTTAAAGTTTTATGAGAATATGTTAAATATGTGTAATTAATTTTTTTATCTTCA

|           |                                                                                                                                                                                                                                                                                                                                                                                                                                                                                                                                                                                                                                                                                                                                                                                                                                                                                                                                                                                                                                                                                                                                                                                                                                                                                                                                                                                                                                                                                                                                                                                                                                                                                                                                                                                                                                                                                                                                                                                                                                                                                                                                                                                                                                                                                                                                                                                                                                                                                                                                                                                                                                                                                                                                                                                                                                                                                                                                                                                                                                                                                                                                                                                                                                                                                                                                                                                                                                                                                                                                                                                                                                                                                                                                                                                                                                                                                                                                                                                                                                                                                                                                                                                                                                                                                                                                                                                                                                                                                                                                                                                                                                                                                                                                                                                                                                                                                                                                                                                                                                                                                                                                                                                                                                                                                                    |
|-----------|----------------------------------------------------------------------------------------------------------------------------------------------------------------------------------------------------------------------------------------------------------------------------------------------------------------------------------------------------------------------------------------------------------------------------------------------------------------------------------------------------------------------------------------------------------------------------------------------------------------------------------------------------------------------------------------------------------------------------------------------------------------------------------------------------------------------------------------------------------------------------------------------------------------------------------------------------------------------------------------------------------------------------------------------------------------------------------------------------------------------------------------------------------------------------------------------------------------------------------------------------------------------------------------------------------------------------------------------------------------------------------------------------------------------------------------------------------------------------------------------------------------------------------------------------------------------------------------------------------------------------------------------------------------------------------------------------------------------------------------------------------------------------------------------------------------------------------------------------------------------------------------------------------------------------------------------------------------------------------------------------------------------------------------------------------------------------------------------------------------------------------------------------------------------------------------------------------------------------------------------------------------------------------------------------------------------------------------------------------------------------------------------------------------------------------------------------------------------------------------------------------------------------------------------------------------------------------------------------------------------------------------------------------------------------------------------------------------------------------------------------------------------------------------------------------------------------------------------------------------------------------------------------------------------------------------------------------------------------------------------------------------------------------------------------------------------------------------------------------------------------------------------------------------------------------------------------------------------------------------------------------------------------------------------------------------------------------------------------------------------------------------------------------------------------------------------------------------------------------------------------------------------------------------------------------------------------------------------------------------------------------------------------------------------------------------------------------------------------------------------------------------------------------------------------------------------------------------------------------------------------------------------------------------------------------------------------------------------------------------------------------------------------------------------------------------------------------------------------------------------------------------------------------------------------------------------------------------------------------------------------------------------------------------------------------------------------------------------------------------------------------------------------------------------------------------------------------------------------------------------------------------------------------------------------------------------------------------------------------------------------------------------------------------------------------------------------------------------------------------------------------------------------------------------------------------------------------------------------------------------------------------------------------------------------------------------------------------------------------------------------------------------------------------------------------------------------------------------------------------------------------------------------------------------------------------------------------------------------------------------------------------------------------------------------|
| CrLEA2-44 | <p>TAATAATATTATATTTTCATCTTTTTTCATAAAAAATATTAGCAAACAATATAGTTAAAAAATTAACAATTTT<br/> TTTTTTAAAAAATCTGGGAATGTTTTTTTAAACATTTCCAACCAACTATAGAAAAATTAATATTTTAAATTAAG<br/> ATTGAAGTATAAAAGAATCTTCTACCAACATCTTCTACCAATCATCTTTTCATAAAAGTGGTATATCAT<br/> ATATTTTAAATTTTATCATTAACATAAAACCTAGTATATTATATGCGTTAATTTTCAACACAATATTAATA<br/> TAATTTTTTTTACACTATTAACATAAACCAAACTAAGATAAGTATGATTTTTTGGAAATAATTATTTTAAAAAT<br/> TATTTTTTAAATAATATTTTTTTTTTATGGATGATAATCTAAATTTTCTTTTTTACCAATATCATTGGATTA<br/> CAATTAATTTATTATTTTTTTTATTTGGATGATCATCAACTTAAGAATTTACTTAAAAAATATTTTCATTGGA<br/> TAACTTTTTGAAAGATATCAATTTTAGTAAATTTAACCGTTAAATAATAAATTTCTATATATAGATTAAGT<br/> TTACAAATTTTTTATAAAAAATAAAAAATAATTTGATAATCTATTAATAAATAATTTAATTTAATATATAATAT<br/> ATTTTAAAAATTAATTAATATCAATCATAAAAATATATATATAAATTTAATATGTTTGATTAACATATTA<br/> ACACCATATTATTCAATGATGAAACACATTAATTTGAATTTTATAAGAAAAATCCAGTGGATTATTTTTAT<br/> TTTTCCAAAAATATTCCTAATTTTTATTCTCGTCCAAATATATTAATATAAATTTTATATTTTATAATTAATC<br/> TATAACTATATAGAGCCGTAATTTTCATTATTTTAAACAGATTTTTAAGGTTAGGATTGTGGTTAAGGGAT<br/> TTTTAATTTTTTAAATAAATTTTTTAAATATATATATATATATAGTGTATCAATGTTTAAATTAATAAAT<br/> AATTAATATTATTAGCATGTTTGTAAATCAGCTCATTCAAAATATCATTTTTTTCATTATTTTATATACATT<br/> TAAACAATGGAAATAAAAGACCGCACCTTTATAAGAAAAATATTAGTAATTAAGAGTTGGATTGATAGTGA<br/> AAAAAGTTTTTTTAACCATAAAACTCATTAATGACATTTGGTTCATAAATTTTGTACAAATTTATTTAAAT<br/> TTTTGTATAATTAACCAATCCTATTAAATTACAAATTTATTCATTTATAATTTCTTTTAAAAATCTTAATATTT<br/> AATTTCTGATCATATTTCCGAACAAATCAACTATCTACTAATGAAAAACAAGAGAAAAACAACTAATATTAG<br/> TGATTTCCAACGTCGGATAACTATTAGTAAATTAATTAATAACCTAATGTAACCGTGTATTATTTATTTATTC<br/> CCAGTGCAAGTTTGTGAATTTTCTGGTTTTCTGGTGTTCGCTCCGCTGCCATTTATGGTTATGATAGTA<br/> TTAATTTGTACATAATTGTTTCTTGTGTTATACATAAATTTGTATGGTCAATGCAAGTAAGTACTAGGGCCA<br/> GATTAATGTAACTTGATGACTCATAATACGGAATTTTCATATAAGATAAATTAGACTAAACAAGGAAAAATAA<br/> TTTTTTTCATCTTTTTTATTTTTTATTAATTTTTTTTTTATTTTATTCATTTCATTCAAGCATACCAATAATC<br/> GATTAGATTAGGATATAAATAGTTGTGTCACCTTGCTGGATTATGTTTCATTCTTTATTTGGATGATATAAA<br/> AATAATGAAGAAAAATAAATAAATAAATAAATAAAGATAAAAAATAAATTTTAAATAAATAAATAAATAA<br/> AAAAATTTTAAATGAATAAATAAATAAATAAATAAATAAATAAATAAATAAATAAATAAATAAATAAATAA<br/> AAAAATAATTATAATTTATATTATTTTAAAAAATTTAAAAAATAAATTTTCTTCTTCAATTTTAAATAGCCCA<br/> TAATATAAAGATTAAAAATATATATGGTTCTTGAATAAATTTCTTCTATTCATATAAAATAAATTAATC<br/> TAAATAAAAAAATTCATTCTTTTCTTTTCTCTCTATTTTCTCTCTCTCTCTCTCTCTCTCTCTCTCTCTCT<br/> AACTCTCTCTCTCTCTTTTATTATGATAAAAAATAAGTTTTATTTTATTTATATATATATATATATATAT<br/> AAAAAGAAAAAATAAATTTTGAATATAAATTTCTTATATTAACTTAATGTAACCTAATAAATAAATAAATA<br/> TGTATACATAAAAAATTTTAAACACAATAAAAAATTATAATTTCTGTTAGTCACATAAACAATTTATTTTGAT<br/> AAATTTCTCAAAATAGTTGTTTGTGTATTTTTTTTAAATATAAATATAAATTTTAAAGTTATTTTATAATA<br/> TGTAATTATATATAATAGAATATTTATGATATATAATATAAATTTTATGAATTATAATTTATTTATAATAT<br/> ATAATATAGTATTATAATATATATAAATAATTAATTTATTTATCTTTTCATTAGTCAATAAACAATATACAA<br/> AATAAAAAATGGTGTATGCTTAATTTCTTAAACACTTGACGTGCGCAGTTCTACTTATCTTGTACTCGAA<br/> GTGCGTCAACGATCTATTTATGAACCGAAAAAATTACAGAATAACGTTGACTATGATATATAAATTTTAT<br/> GATGAAAAATAATTTATTTTGTCTATCATAGTAATAAATTTCTTTCTTCAATATACCTCTTACATATATG<br/> TTTTCAAGTTAAAAATGATTTTGTCTTCAAGCAATTAATTTTATACATATATATCAAAATTTGATTAAGTTGATTT<br/> TCCCAAAATCGCCGTTCAATTTGTTTTTTAATCTCCTGAATACCCAGAATCATAAACCATGGTTAATAGACG<br/> CGGCAAAAGTTGCATTTGGCGTGTCTCTACTGTTGGTGATGGTTATTGCCATCGTGATTTGTGCATTTGTTT<br/> TAACAATATTGAAGCCGAGGGAACCTGTGATCAGTGTCACCCCTGTTGGTCTCGAAGGCTTTAAACTTTCT<br/> CTTACTTTTTCTCAAAATGTGACGCTAGACATGTTGATCACCGTAGGGAATTCAAACTAATAAAGCTTTGA<br/> ATACAAAAATTCATCACTTATGTGAGTTTTCTGTGATACAGTTGTAGCTGATGTTTCAATCCAGGGAGAGT<br/> TTGTTCCAGCGCGTGGCGCCATTAATGTGACCACTTCCGCGAGTTTGTATGGAAGAAAGTTAATACCTTGAT<br/> CCCAAAATTTTGGTCAGATATTTTAGGTGGCCATTTGAATTTGACATCAACAGCTACACTGCCTGGGGTAGC<br/> GCATGTGCTTAACCTTATCAAAATGAAGGCCACGGCTTATAGCTCATGTACCATCTCTTTGGAATACGTA<br/> CTAAGAATATTTCTTCTAATTCATATCCAAAATCAAGCTTTGA<br/> ATGGCTACTAGAAGCGTCAAAATTTGCTTGTCTGTCTCTACTTTTCTTGATCATTTGTACCATTGTGAT<br/> TGTGACATTTGTTCTGACTCTCTTTAAACCAAGGATCTTAACATCACTGTCCACCCCTCTTGGCCTTGAAA<br/> ACCTTCAATTTTCCCTTTTACCAGTTTACACTAAATGTGTCTCTAGGTATGTTGATCACTTACAGGAAAT<br/> CCTAAGTATGGAAGCTTCGAGTACAAAACTCCACTGGTTATATCAAAATTTTATGACACTGTTGTAGCCCA<br/> AGTTTCAATGGAGGAGAGTTAGTCCCAGCGGTAGCACCATTAAATGTGAACACTACAGCAGATTTTATGG<br/> TTGGAAGATGATAAATGATCCTAATTTTGGAGCTGATGTTTAACTGGGACTTTGAATATGACATCAACA<br/> TCTACACTTCTTGGGAAGCGCGTATGCTCAAGATTATCAAAATTCAGGCCACGGCTTATAGCTCATGTGA<br/> CATCTCTTTTAAATAAACCTCCAAGCATGTTGATACCAAAATGCATATCCAAATTCAGCTTTGA<br/> ATGACAAAGGACTGCGGCCACCATGATGAGGAGCGGCAACAACCTCCTCCGCGCATATTCGCGGCCATCCT<br/> TGGTTTCATTATCCTCATCTCCTCGTAATCTTCTCAATCTGGATCATCTCCGACCCACCAACCCCGTT<br/> TCATTCTTTGAAGACGCCACCGTCTACGCCCTTCAACCTCTCCTCCACCGGCGACATACCTTACCCACCGCC<br/> CCCAACCCCAACCTCTCACTCTCACAATGCAAGTTACTCTTACCGCTCTCAATCCCAATTTCTCGCATCGG<br/> CATTTATTACCACAACCTCCACGCTACGCTCTTACCGCGGCCAGCAAGTTTCCCTCGCCACCGAGCTGC<br/> CACCAGCTTACCAGGCCACCGTGACACCACCGTGTGGTGCAGCTTCTGTACGGAACCGCGTGCAGGTT<br/> TCCCTTACGCTGTTGGAGGTGCTGGAGCAGGACAAAACCTCAGGGGAGTGTGGTCAACGCTCAAGGTCAA<br/> CGGTAGAGTAAAATGGAAGGTGGGGACTTGGGTTTCTGGAAGGTACCATATCTATGCCAACTGCCCGCGT<br/> ATATTAGGCTCGCCGAGATCGGGATACCGGCATCGGAGTTGCGGCGCCGCGGTTAAGTTTCAGCTTTTC<br/> CAAAATTCGCTTGTGTATGTTTATG</p> |
| CrLEA2-45 | <p>ATGACTGACAGAGTCTACCTTTCTGCCAAGCCCGCCGCAACGGAACCGGCGCGCGCTAATCCATCTTT<br/> CCCGCGCAAAAGGCTCAACTCTATGGCGCCACCGCCCTACCTACCGTCCCCAACCTCACCACCGCGCC<br/> GTAGCCGACGCCGATGCTGCTGCAGTTTCTGCTTCTGGCTCATCCTCATCTCTCTAATCCTCCTCTCTCTC<br/> CTCGCGTCGCGCGCACCGTCTTCTACCTCCTATACCGCCCCACCGTCTCTCTCACCCTCACATCTCGT<br/> GAAACTGTCTGACCTGAACCTCACCACCTCCTCCTCCTCAGTCCAGATCTGACCTCAACGCTGAGCG<br/> CCACCAACCTAACAAAGATCCTCTTCGCTACGACATCACCTCCATCTCCATCTGTCTCGCGCATGTG<br/> GACGTCGGCGACGGCACCATTCGGCGTTCAGCAGCGAAAGAAGAACACGACGCTGCTAAAGGCTTCAAT<br/> CTCAGCAGTGGACAGGCACTGACGAGTGACGATGCGTCGCGGTTGAAGGCAACATGAAGAGCAAGAGT<br/> GATTGCCATTGGAAGTGAATTTGGAGACAAAGGTGAAGGCAAGATGGGAACTTGAAGACTCCAAGGTA</p>                                                                                                                                                                                                                                                                                                                                                                                                                                                                                                                                                                                                                                                                                                                                                                                                                                                                                                                                                                                                                                                                                                                                                                                                                                                                                                                                                                                                                                                                                                                                                                                                                                                                                                                                                                                                                                                                                                                                                                                                                                                                                                                                                                                                                                                                                                                                                                                                                                                                                                                                                                                                                                                                                                                                                                                                                                                                                                                                                                                                                                                                                                                                                                                                                                                                                                                                                                                                                                                                                                                                                                                                                                                                                                                                                                                                                                                                                                                                                                                                                                                                                                                                                                                                                                                                                                                                                                                                                                                                                                                                                                                                      |
| CrLEA2-46 |                                                                                                                                                                                                                                                                                                                                                                                                                                                                                                                                                                                                                                                                                                                                                                                                                                                                                                                                                                                                                                                                                                                                                                                                                                                                                                                                                                                                                                                                                                                                                                                                                                                                                                                                                                                                                                                                                                                                                                                                                                                                                                                                                                                                                                                                                                                                                                                                                                                                                                                                                                                                                                                                                                                                                                                                                                                                                                                                                                                                                                                                                                                                                                                                                                                                                                                                                                                                                                                                                                                                                                                                                                                                                                                                                                                                                                                                                                                                                                                                                                                                                                                                                                                                                                                                                                                                                                                                                                                                                                                                                                                                                                                                                                                                                                                                                                                                                                                                                                                                                                                                                                                                                                                                                                                                                                    |

|           |                                                                                                                                                                                                                                                                                                                                                                                                                                                                                                                                                                                                                                                                                                                                                                                                                                                                                                                                                                                                                                                                                                                                                                                                                                                                                                                                                                                                                                                                                                                                                                                                                                                                                                                                                                                                                                                                                                                                                                                                                                                                                                                                                                                                                                                                                   |
|-----------|-----------------------------------------------------------------------------------------------------------------------------------------------------------------------------------------------------------------------------------------------------------------------------------------------------------------------------------------------------------------------------------------------------------------------------------------------------------------------------------------------------------------------------------------------------------------------------------------------------------------------------------------------------------------------------------------------------------------------------------------------------------------------------------------------------------------------------------------------------------------------------------------------------------------------------------------------------------------------------------------------------------------------------------------------------------------------------------------------------------------------------------------------------------------------------------------------------------------------------------------------------------------------------------------------------------------------------------------------------------------------------------------------------------------------------------------------------------------------------------------------------------------------------------------------------------------------------------------------------------------------------------------------------------------------------------------------------------------------------------------------------------------------------------------------------------------------------------------------------------------------------------------------------------------------------------------------------------------------------------------------------------------------------------------------------------------------------------------------------------------------------------------------------------------------------------------------------------------------------------------------------------------------------------|
| CrLEA2-47 | GGAAATCAGAGTGTGTTTGGCGACGGAATAAGAGTCACTCTTCCACCCGGTAAGAAGCCTGCAACAGCGTCCAC<br>CAAAAATGTTAAGTGCACGTCAATGTTTCGATTCAAGATCTGGAAGTGGACCGTTTGA<br>ATGCTGTCTGCAAAATCTGAATCAGATATTACTAGCTTAGCTCCATCTTCAAGATCTCCAAAGCG<br>GCCTGTGTACTATGTGCAAAAGTCCCTCAAGAGATTACATGATGGAGACAGTCACTTCAATGCAGGCTA<br>CTCCAATATCAAACAGTCCATGGAGTCTCCTTCTCACCCCTCTTTTGGGCGTCATTCTAGAAACTCTTCT<br>GCTAGCAGGTTTTTCAGGGATTTTCAGGTCATCTTCTGGAAGGAAAGGTAGTAGGAAGAGGAATGATAAGGG<br>GTGGCCTGAGTGTGATGTGATTCTAGAAGAAGGCTCTTATCATGAATTTTCAGGACAAGGCCTTTACTAGGC<br>GCTTCCAAGCCTTGATTGCTGTGTTTACTTTTGTGGTTGTCTTCACCGTGTTTTGGCTTGATCATTGGGGT<br>GCTAGCAGGCCTTACAAAAGTCTGAGTTACTGTTAAGGTAACATAATTTTCTTTTCTCAGTTTGAAGGAC<br>TAGTAATTTCTGTGTTTATTTTAGACCATTAATACTTGCTCTTAGTTACTCATACATCATGTCTACACCTG<br>CGGTGGGAGTAAAAATTTTGTACCTTTCTTGGTCAATCACATTTCTATAAAGTCATCAAGATGATATG<br>AATCATAAATCAGAACTCTTGTTTTATATAATCTTTTATGAATCCATTTTAGATGCTGCTGCAATAGTAACAC<br>GAGGCCTCTCCATGTCAGAAATGTATTTTCAACTTGAAAGAACTGTATAGTCTTTATAAATTGACATAAT<br>AAGTTTATCTATTAATGTATTTTATTTATTTTCTGATCCTGTCAATGGGTTTGTGTATTCGGGAAATTC<br>AATTTTATTTCAAATTAGCACATGGGATATGATTACTGTAATCTTCACCAACAATATGATTACTATAAG<br>TCCCTAAAAAGCTTGCGTAGCATTATATATATAATAGTGTTCAAAGCGAATAATTTACTATAATATC<br>TTAATTCCTAAATTTGATTGGATACCCCACTTTTAACTTGACATTAGTAATAATAGCAGTATGCCACCG<br>CTTCAGCATGTAACAACAAAGACCCGAAGCAATGAATTTATGAAAGTATTGCTGCAATTCAGGTATCTCA<br>TAAACTAATGCTAGGATCAAAGGAGTTCGTAAAAATTTGTGCTTACAACGTCTCTAATTACTTGCTACT<br>TACAGCTACTACATTCACAAATACATAACTGCTTGACATTTGGATTGTCAGAGTTGTCAGATACAGTACA<br>TAATCTCTATGTTGGAGAGGGTTTAGACTTCACAGGTGTCCCAACAAAAATGCTGACAGTGAATGGCACTT<br>TACGCATGAGCATCTACAACCTGTACATTTTTTGGCATCCACGTGCATTCCACACCCATCAATCTTATC<br>TTCTCAGACATCACCGTTGCAACTGGCAAGGTAACAATTTCTTCTCATCACTGCCCTTCTCTGCTAAACAAC<br>AAGCAATTCATCAAGCATGACATGACCAACCACTTTCACTCTCACTCCAACCTCATCAGCATCAAAACG<br>ACCAAGGATGTTACAACTGTATAAACGTTTCAATTAACATTGAAAAATATATAAAGTACATCTACATTCAAG<br>TCCTGTGTTGGCATGCATTTGTAAAGTGACATGTTGTCTCTGTCATGTAACCTTTGTGTCAGCTAAAGAAAT<br>ACTATCAACCCAGAAAAAGTCAACGTTATTTGATCAGTGAATGTAGAAGGTAACAAGGTTCCCTGTATGGG<br>GCAGGATCCACCATAAACAGTATACAAACTGGTGTGAAGTTCCACTCACATTAACCTTTGAAATCCGTTT<br>CCGTGGAATGTAGTAGGTAAGCTGGTAAGGTCAAAGCATCATAAGGAAATCACTTGTCCATTGGTCATCA<br>ACTCTTCTGGATCAAAACCTATCAAGTTCAAAGGAATGCATGCACATATGAATGA |
|           | ATGATGTGTTGGATATACGTACCATCTTCGACGTTCAAACTGCAATAGCAAAAATACAGAGAGCGTCCA<br>AAGGAAAGCCATGAAAATCTCAAAAGCTGCTTACGACCTTCTCCTACGGAACCTCATCAGCATCAAAACG<br>ACATCGTTTATTACGCGCTTGTGTACTGACGCTCACCTGCACGCTGGGTCTGGTGTCTCCTCCTCACCACC<br>ATCTACGCTTCTTGCCCGTCAGATCCTGATCTGAAGATCGTAGGGTTCAAGCTGAAGCGGGTCAAGCTGCA<br>CCCGTTGCCCTCCCGTAACCGTGGACATATCCATGCTCATCAGCTGAGAGTGCACAACACTGATATGTACT<br>CCTTGGATTTTGGAGCCGTTAACGTGATCGTTGCCTACAGGGGGGTGAGGCTCGGGCAGCTGACATCCAGC<br>CATGGGCACGTGAGAGCCAGGGGATCTTCTACGTGGATGCTGACGTGGAATTTTCTGGAATCAGTGTGCT<br>TCCGCAGATGGTATGGTGTGCTGGAGGACGTTGTTAAGGGTATCGTACCCTTTGATACTGTTAGCCAGGTTA<br>GGGGCCAATTTGGGGCTTCTCTTCTTCACTTCCCTATGAAGGTAACCTTAACCTTACTTAATTACATAATAC<br>CATTTTATCAATAATCAAAATTTCAATTAATAGCTAATACTTTGAATTTGCGGAGTGTCTCTGCTCTGTAA<br>TATGATAACATCCACAGTCAAGGCTATCGTGTGAGGTTGTGGTGTAGTATACAAAACAGACGATGTTTCG<br>CCAACATTGTCAACCGCGGGGTAAGCTTACACTGCTATTGAGTTTCTTAATTTATGGAGTGCATGTGATGATG<br>TGATAACAATTTGTTGATAATTTAACTTGTCAATTTTCAACCAATGTGCATGCTTATGTTAGAATGAATAT<br>GTTTGTATTTCACTTCAGAGATGA                                                                                                                                                                                                                                                                                                                                                                                                                                                                                                                                                                                                                                                                                                                                                                                                                                                                                                                                                                                                                                                                                                                                                                                                                                            |
|           | ATGTGTGAGAGCAAGAGTTTCTACAAATGGCTCATGCAATTCATATGCCTTTTAGGCCTCCTTGTCTGTG<br>CCTATGGCTGTCTTACGACCCAAAGAGCCCTCCTACTCCATTGTATGCATCTCCATAGAACAAAGCCTCGA<br>ACTCGAATCAAAACGGCACCATCTCTTACCAACTTCAAATGAAAACCCAAACAAGGAATCAAGCATTTTAC<br>CATGATGATATAATATTAAGTTTCTTATATGGGCAGATGGAGGATGAGGTGGGGAGGATGACATGAGCTC<br>ATTCCATCAAGAACTGGTAACACCCGAGATAAAATTTGGTACTGTCAACGCCAAACCTCGACCATTCAAAC<br>CTCTCTTGAACGCCATCTCAAATGCAACCCGAGAGTTAACAGTTGCTTTGAAGACAAAATTTGATACAAAG<br>ACATGGGGAATTAAGAGCAAGTCCCATGGTTTACACCTCAAAGGTATTCTACCAATTGATTCCAATGGGAA<br>GCTTTCACGTAACAAGAAAAAGTACCCACTTAGTCCCAATTTCCCAAAAAATAGGAAGGTACAAAATAAAGC<br>ACTGA                                                                                                                                                                                                                                                                                                                                                                                                                                                                                                                                                                                                                                                                                                                                                                                                                                                                                                                                                                                                                                                                                                                                                                                                                                                                                                                                                                                                                                                                                                                                                                                                                                                      |
|           | ATGAGGTGTTCCAAAGGTTGAAAATCTGTGTGTGTCTCTGCCATTCTTCTAATTATATTGGTTGTGGT<br>ACTTGTGATCTTGTCTTCCAGGTTTTCAAGCCCAAGACCCCGATATTATCCTACAGTCAGTTAAGCTTG<br>AAAGGATCGAAATTTGGCTTCCCAAGTCCAGAAATAAATGTGTCAATAGGCTTAGGCTACGCTTCAAGAAC<br>CCCAATCATGGAAGCTTTACTTACCAAAACAGCACTGCTTATCTTAATTATCGAGGGAATATTGTGGCTGA<br>GGCTCCTATACATGAGGACACAATTCCTGCTCGTGGAGATCATAACATAAGCACATCTTTGGATATTTTTG<br>CAGATATCAGAAAAATTAAGGATTTACCGAGTGATTTTTTAAGGGGCGTTATAAATTTTACCTCAACAACC<br>ACCTTACAAGGCAAAAGTCAAAATATTGCACCTCTTCAAGTTCAAGGCCACTGTTACTCCACCTGTGATCT<br>CTCTTTACTCGTACATGACAAAAGCATCAATTTCTACCTGCAACACAAAAATCAAATTATAA                                                                                                                                                                                                                                                                                                                                                                                                                                                                                                                                                                                                                                                                                                                                                                                                                                                                                                                                                                                                                                                                                                                                                                                                                                                                                                                                                                                                                                                                                                                                                                                                                                                                            |
|           | ATGACCAAGCCACAGAGCCGCACCAACCTAGCTTCATGTTTCGTGCCCACAATCTTTTGTATTTTCCCTGT<br>AATCGTCTCTTCTGCTGTTTACTTTACGGTTTTCAAGCCCGAGGATCCCAAAATCTCCGTGAGCGCGGTT<br>AGCTCCCTTCCCTTTCCGTCACTAACGGCACCGTCAATTTACCTTTTCCCAATAGCCTTCCGTTAGGAAC<br>CCTAATCGAGGCACCTTCTCGCACTATGACAGCTCACTCCAGCTTCTCTACTATGGCAGACAGGTGCGGTT<br>CATGTTTATCCCGCCGGCAAGATCGACGCGCGGCAAGTCAAGTACATGGCGGCCAGGTTACCGTTCAAG<br>CATTCCCGTTGGGCTTTGGCCCCACCTTTATTAACGGGGCCATTATGTGGGGCCACGATGGAGATCGAG<br>TCGAGAATATCGATGGCGGGACGATGAGAGTGTGCACCTTTCACTCATCATGCTTGGAGCCAAAGCTCT<br>ATGCAGGGTCCCCATCGCCGTTCCCGATGGAACCGTCTTAGGTTTTCACTGCTAA                                                                                                                                                                                                                                                                                                                                                                                                                                                                                                                                                                                                                                                                                                                                                                                                                                                                                                                                                                                                                                                                                                                                                                                                                                                                                                                                                                                                                                                                                                                                                                                                                                                                                      |
|           | ATGTCAGAAACAGTGACCGAGTCCCGGTCAAGTCCAGAACGAGGAGGTATATATACACACAACATCAGA<br>GAAATTAATCGCCATGTTCCCAATACGCAAGAAGAAAGAAAAAGCAGCAATGTGGTGTACGCTTTGG<br>TTACATTTGCTACCTATTTGGGGGTTGTATGTTTCTCATCTATCTTTTGGTGGTGGAGATCCCAAAAT<br>GAATTGATATCAGCTAGGTTGGTGGACAATATTAATCATACCGTTATTTTCAAGCATCATCTCTTTTAAATTT<br>GAGCATGATTGGGCGTGTGAGCCTGTGGAACCCAACTTTGGTCGCTTCTATTACGACAACACTACAGTGA<br>GTGTGATGTATGGGGATTTTAGTATTTGGTGCTTCCGAATTTGGGAGGTGCGATTCTGGAGGCTAGAGAAATC<br>AAAGAATTCAATTCATCGTAAATATGAGGTTCACTGAGGAATTTGGTGAATCTTACCAATGATATCAGTTC                                                                                                                                                                                                                                                                                                                                                                                                                                                                                                                                                                                                                                                                                                                                                                                                                                                                                                                                                                                                                                                                                                                                                                                                                                                                                                                                                                                                                                                                                                                                                                                                                                                                                                                                               |
|           |                                                                                                                                                                                                                                                                                                                                                                                                                                                                                                                                                                                                                                                                                                                                                                                                                                                                                                                                                                                                                                                                                                                                                                                                                                                                                                                                                                                                                                                                                                                                                                                                                                                                                                                                                                                                                                                                                                                                                                                                                                                                                                                                                                                                                                                                                   |
|           |                                                                                                                                                                                                                                                                                                                                                                                                                                                                                                                                                                                                                                                                                                                                                                                                                                                                                                                                                                                                                                                                                                                                                                                                                                                                                                                                                                                                                                                                                                                                                                                                                                                                                                                                                                                                                                                                                                                                                                                                                                                                                                                                                                                                                                                                                   |
|           |                                                                                                                                                                                                                                                                                                                                                                                                                                                                                                                                                                                                                                                                                                                                                                                                                                                                                                                                                                                                                                                                                                                                                                                                                                                                                                                                                                                                                                                                                                                                                                                                                                                                                                                                                                                                                                                                                                                                                                                                                                                                                                                                                                                                                                                                                   |
|           |                                                                                                                                                                                                                                                                                                                                                                                                                                                                                                                                                                                                                                                                                                                                                                                                                                                                                                                                                                                                                                                                                                                                                                                                                                                                                                                                                                                                                                                                                                                                                                                                                                                                                                                                                                                                                                                                                                                                                                                                                                                                                                                                                                                                                                                                                   |
|           |                                                                                                                                                                                                                                                                                                                                                                                                                                                                                                                                                                                                                                                                                                                                                                                                                                                                                                                                                                                                                                                                                                                                                                                                                                                                                                                                                                                                                                                                                                                                                                                                                                                                                                                                                                                                                                                                                                                                                                                                                                                                                                                                                                                                                                                                                   |
| CrLEA2-48 |                                                                                                                                                                                                                                                                                                                                                                                                                                                                                                                                                                                                                                                                                                                                                                                                                                                                                                                                                                                                                                                                                                                                                                                                                                                                                                                                                                                                                                                                                                                                                                                                                                                                                                                                                                                                                                                                                                                                                                                                                                                                                                                                                                                                                                                                                   |
| CrLEA2-49 | ATGTGTGAGAGCAAGAGTTTCTACAAATGGCTCATGCAATTCATATGCCTTTTAGGCCTCCTTGTCTGTG<br>CCTATGGCTGTCTTACGACCCAAAGAGCCCTCCTACTCCATTGTATGCATCTCCATAGAACAAAGCCTCGA<br>ACTCGAATCAAAACGGCACCATCTCTTACCAACTTCAAATGAAAACCCAAACAAGGAATCAAGCATTTTAC<br>CATGATGATATAATATTAAGTTTCTTATATGGGCAGATGGAGGATGAGGTGGGGAGGATGACATGAGCTC<br>ATTCCATCAAGAACTGGTAACACCCGAGATAAAATTTGGTACTGTCAACGCCAAACCTCGACCATTCAAAC<br>CTCTCTTGAACGCCATCTCAAATGCAACCCGAGAGTTAACAGTTGCTTTGAAGACAAAATTTGATACAAAG<br>ACATGGGGAATTAAGAGCAAGTCCCATGGTTTACACCTCAAAGGTATTCTACCAATTGATTCCAATGGGAA<br>GCTTTCACGTAACAAGAAAAAGTACCCACTTAGTCCCAATTTCCCAAAAAATAGGAAGGTACAAAATAAAGC<br>ACTGA                                                                                                                                                                                                                                                                                                                                                                                                                                                                                                                                                                                                                                                                                                                                                                                                                                                                                                                                                                                                                                                                                                                                                                                                                                                                                                                                                                                                                                                                                                                                                                                                                                                      |
|           | ATGAGGTGTTCCAAAGGTTGAAAATCTGTGTGTGTCTCTGCCATTCTTCTAATTATATTGGTTGTGGT<br>ACTTGTGATCTTGTCTTCCAGGTTTTCAAGCCCAAGACCCCGATATTATCCTACAGTCAGTTAAGCTTG<br>AAAGGATCGAAATTTGGCTTCCCAAGTCCAGAAATAAATGTGTCAATAGGCTTAGGCTACGCTTCAAGAAC<br>CCCAATCATGGAAGCTTTACTTACCAAAACAGCACTGCTTATCTTAATTATCGAGGGAATATTGTGGCTGA<br>GGCTCCTATACATGAGGACACAATTCCTGCTCGTGGAGATCATAACATAAGCACATCTTTGGATATTTTTG<br>CAGATATCAGAAAAATTAAGGATTTACCGAGTGATTTTTTAAGGGGCGTTATAAATTTTACCTCAACAACC<br>ACCTTACAAGGCAAAAGTCAAAATATTGCACCTCTTCAAGTTCAAGGCCACTGTTACTCCACCTGTGATCT<br>CTCTTTACTCGTACATGACAAAAGCATCAATTTCTACCTGCAACACAAAAATCAAATTATAA                                                                                                                                                                                                                                                                                                                                                                                                                                                                                                                                                                                                                                                                                                                                                                                                                                                                                                                                                                                                                                                                                                                                                                                                                                                                                                                                                                                                                                                                                                                                                                                                                                                                            |
|           | ATGACCAAGCCACAGAGCCGCACCAACCTAGCTTCATGTTTCGTGCCCACAATCTTTTGTATTTTCCCTGT<br>AATCGTCTCTTCTGCTGTTTACTTTACGGTTTTCAAGCCCGAGGATCCCAAAATCTCCGTGAGCGCGGTT<br>AGCTCCCTTCCCTTTCCGTCACTAACGGCACCGTCAATTTACCTTTTCCCAATAGCCTTCCGTTAGGAAC<br>CCTAATCGAGGCACCTTCTCGCACTATGACAGCTCACTCCAGCTTCTCTACTATGGCAGACAGGTGCGGTT<br>CATGTTTATCCCGCCGGCAAGATCGACGCGCGGCAAGTCAAGTACATGGCGGCCAGGTTACCGTTCAAG<br>CATTCCCGTTGGGCTTTGGCCCCACCTTTATTAACGGGGCCATTATGTGGGGCCACGATGGAGATCGAG<br>TCGAGAATATCGATGGCGGGACGATGAGAGTGTGCACCTTTCACTCATCATGCTTGGAGCCAAAGCTCT<br>ATGCAGGGTCCCCATCGCCGTTCCCGATGGAACCGTCTTAGGTTTTCACTGCTAA                                                                                                                                                                                                                                                                                                                                                                                                                                                                                                                                                                                                                                                                                                                                                                                                                                                                                                                                                                                                                                                                                                                                                                                                                                                                                                                                                                                                                                                                                                                                                                                                                                                                                      |
|           | ATGTCAGAAACAGTGACCGAGTCCCGGTCAAGTCCAGAACGAGGAGGTATATATACACACAACATCAGA<br>GAAATTAATCGCCATGTTCCCAATACGCAAGAAGAAAGAAAAAGCAGCAATGTGGTGTACGCTTTGG<br>TTACATTTGCTACCTATTTGGGGGTTGTATGTTTCTCATCTATCTTTTGGTGGTGGAGATCCCAAAAT<br>GAATTGATATCAGCTAGGTTGGTGGACAATATTAATCATACCGTTATTTTCAAGCATCATCTCTTTTAAATTT<br>GAGCATGATTGGGCGTGTGAGCCTGTGGAACCCAACTTTGGTCGCTTCTATTACGACAACACTACAGTGA<br>GTGTGATGTATGGGGATTTTAGTATTTGGTGCTTCCGAATTTGGGAGGTGCGATTCTGGAGGCTAGAGAAATC<br>AAAGAATTCAATTCATCGTAAATATGAGGTTCACTGAGGAATTTGGTGAATCTTACCAATGATATCAGTTC                                                                                                                                                                                                                                                                                                                                                                                                                                                                                                                                                                                                                                                                                                                                                                                                                                                                                                                                                                                                                                                                                                                                                                                                                                                                                                                                                                                                                                                                                                                                                                                                                                                                                                                                               |
|           |                                                                                                                                                                                                                                                                                                                                                                                                                                                                                                                                                                                                                                                                                                                                                                                                                                                                                                                                                                                                                                                                                                                                                                                                                                                                                                                                                                                                                                                                                                                                                                                                                                                                                                                                                                                                                                                                                                                                                                                                                                                                                                                                                                                                                                                                                   |
|           |                                                                                                                                                                                                                                                                                                                                                                                                                                                                                                                                                                                                                                                                                                                                                                                                                                                                                                                                                                                                                                                                                                                                                                                                                                                                                                                                                                                                                                                                                                                                                                                                                                                                                                                                                                                                                                                                                                                                                                                                                                                                                                                                                                                                                                                                                   |
|           |                                                                                                                                                                                                                                                                                                                                                                                                                                                                                                                                                                                                                                                                                                                                                                                                                                                                                                                                                                                                                                                                                                                                                                                                                                                                                                                                                                                                                                                                                                                                                                                                                                                                                                                                                                                                                                                                                                                                                                                                                                                                                                                                                                                                                                                                                   |
|           |                                                                                                                                                                                                                                                                                                                                                                                                                                                                                                                                                                                                                                                                                                                                                                                                                                                                                                                                                                                                                                                                                                                                                                                                                                                                                                                                                                                                                                                                                                                                                                                                                                                                                                                                                                                                                                                                                                                                                                                                                                                                                                                                                                                                                                                                                   |
|           |                                                                                                                                                                                                                                                                                                                                                                                                                                                                                                                                                                                                                                                                                                                                                                                                                                                                                                                                                                                                                                                                                                                                                                                                                                                                                                                                                                                                                                                                                                                                                                                                                                                                                                                                                                                                                                                                                                                                                                                                                                                                                                                                                                                                                                                                                   |
|           |                                                                                                                                                                                                                                                                                                                                                                                                                                                                                                                                                                                                                                                                                                                                                                                                                                                                                                                                                                                                                                                                                                                                                                                                                                                                                                                                                                                                                                                                                                                                                                                                                                                                                                                                                                                                                                                                                                                                                                                                                                                                                                                                                                                                                                                                                   |
|           |                                                                                                                                                                                                                                                                                                                                                                                                                                                                                                                                                                                                                                                                                                                                                                                                                                                                                                                                                                                                                                                                                                                                                                                                                                                                                                                                                                                                                                                                                                                                                                                                                                                                                                                                                                                                                                                                                                                                                                                                                                                                                                                                                                                                                                                                                   |
|           |                                                                                                                                                                                                                                                                                                                                                                                                                                                                                                                                                                                                                                                                                                                                                                                                                                                                                                                                                                                                                                                                                                                                                                                                                                                                                                                                                                                                                                                                                                                                                                                                                                                                                                                                                                                                                                                                                                                                                                                                                                                                                                                                                                                                                                                                                   |
| CrLEA2-50 |                                                                                                                                                                                                                                                                                                                                                                                                                                                                                                                                                                                                                                                                                                                                                                                                                                                                                                                                                                                                                                                                                                                                                                                                                                                                                                                                                                                                                                                                                                                                                                                                                                                                                                                                                                                                                                                                                                                                                                                                                                                                                                                                                                                                                                                                                   |
| CrLEA2-51 | ATGTGTGAGAGCAAGAGTTTCTACAAATGGCTCATGCAATTCATATGCCTTTTAGGCCTCCTTGTCTGTG<br>CCTATGGCTGTCTTACGACCCAAAGAGCCCTCCTACTCCATTGTATGCATCTCCATAGAACAAAGCCTCGA<br>ACTCGAATCAAAACGGCACCATCTCTTACCAACTTCAAATGAAAACCCAAACAAGGAATCAAGCATTTTAC<br>CATGATGATATAATATTAAGTTTCTTATATGGGCAGATGGAGGATGAGGTGGGGAGGATGACATGAGCTC<br>ATTCCATCAAGAACTGGTAACACCCGAGATAAAATTTGGTACTGTCAACGCCAAACCTCGACCATTCAAAC<br>CTCTCTTGAACGCCATCTCAAATGCAACCCGAGAGTTAACAGTTGCTTTGAAGACAAAATTTGATACAAAG<br>ACATGGGGAATTAAGAGCAAGTCCCATGGTTTACACCTCAAAGGTATTCTACCAATTGATTCCAATGGGAA<br>GCTTTCACGTAACAAGAAAAAGTACCCACTTAGTCCCAATTTCCCAAAAAATAGGAAGGTACAAAATAAAGC<br>ACTGA                                                                                                                                                                                                                                                                                                                                                                                                                                                                                                                                                                                                                                                                                                                                                                                                                                                                                                                                                                                                                                                                                                                                                                                                                                                                                                                                                                                                                                                                                                                                                                                                                                                      |
|           | ATGAGGTGTTCCAAAGGTTGAAAATCTGTGTGTGTCTCTGCCATTCTTCTAATTATATTGGTTGTGGT<br>ACTTGTGATCTTGTCTTCCAGGTTTTCAAGCCCAAGACCCCGATATTATCCTACAGTCAGTTAAGCTTG<br>AAAGGATCGAAATTTGGCTTCCCAAGTCCAGAAATAAATGTGTCAATAGGCTTAGGCTACGCTTCAAGAAC<br>CCCAATCATGGAAGCTTTACTTACCAAAACAGCACTGCTTATCTTAATTATCGAGGGAATATTGTGGCTGA<br>GGCTCCTATACATGAGGACACAATTCCTGCTCGTGGAGATCATAACATAAGCACATCTTTGGATATTTTTG<br>CAGATATCAGAAAAATTAAGGATTTACCGAGTGATTTTTTAAGGGGCGTTATAAATTTTACCTCAACAACC<br>ACCTTACAAGGCAAAAGTCAAAATATTGCACCTCTTCAAGTTCAAGGCCACTGTTACTCCACCTGTGATCT<br>CTCTTTACTCGTACATGACAAAAGCATCAATTTCTACCTGCAACACAAAAATCAAATTATAA                                                                                                                                                                                                                                                                                                                                                                                                                                                                                                                                                                                                                                                                                                                                                                                                                                                                                                                                                                                                                                                                                                                                                                                                                                                                                                                                                                                                                                                                                                                                                                                                                                                                            |
|           | ATGACCAAGCCACAGAGCCGCACCAACCTAGCTTCATGTTTCGTGCCCACAATCTTTTGTATTTTCCCTGT<br>AATCGTCTCTTCTGCTGTTTACTTTACGGTTTTCAAGCCCGAGGATCCCAAAATCTCCGTGAGCGCGGTT<br>AGCTCCCTTCCCTTTCCGTCACTAACGGCACCGTCAATTTACCTTTTCCCAATAGCCTTCCGTTAGGAAC<br>CCTAATCGAGGCACCTTCTCGCACTATGACAGCTCACTCCAGCTTCTCTACTATGGCAGACAGGTGCGGTT<br>CATGTTTATCCCGCCGGCAAGATCGACGCGCGGCAAGTCAAGTACATGGCGGCCAGGTTACCGTTCAAG<br>CATTCCCGTTGGGCTTTGGCCCCACCTTTATTAACGGGGCCATTATGTGGGGCCACGATGGAGATCGAG<br>TCGAGAATATCGATGGCGGGACGATGAGAGTGTGCACCTTTCACTCATCATGCTTGGAGCCAAAGCTCT<br>ATGCAGGGTCCCCATCGCCGTTCCCGATGGAACCGTCTTAGGTTTTCACTGCTAA                                                                                                                                                                                                                                                                                                                                                                                                                                                                                                                                                                                                                                                                                                                                                                                                                                                                                                                                                                                                                                                                                                                                                                                                                                                                                                                                                                                                                                                                                                                                                                                                                                                                                      |
|           | ATGTCAGAAACAGTGACCGAGTCCCGGTCAAGTCCAGAACGAGGAGGTATATATACACACAACATCAGA<br>GAAATTAATCGCCATGTTCCCAATACGCAAGAAGAAAGAAAAAGCAGCAATGTGGTGTACGCTTTGG<br>TTACATTTGCTACCTATTTGGGGGTTGTATGTTTCTCATCTATCTTTTGGTGGTGGAGATCCCAAAAT<br>GAATTGATATCAGCTAGGTTGGTGGACAATATTAATCATACCGTTATTTTCAAGCATCATCTCTTTTAAATTT<br>GAGCATGATTGGGCGTGTGAGCCTGTGGAACCCAACTTTGGTCGCTTCTATTACGACAACACTACAGTGA<br>GTGTGATGTATGGGGATTTTAGTATTTGGTGCTTCCGAATTTGGGAGGTGCGATTCTGGAGGCTAGAGAAATC<br>AAAGAATTCAATTCATCGTAAATATGAGGTTCACTGAGGAATTTGGTGAATCTTACCAATGATATCAGTTC                                                                                                                                                                                                                                                                                                                                                                                                                                                                                                                                                                                                                                                                                                                                                                                                                                                                                                                                                                                                                                                                                                                                                                                                                                                                                                                                                                                                                                                                                                                                                                                                                                                                                                                                               |
|           |                                                                                                                                                                                                                                                                                                                                                                                                                                                                                                                                                                                                                                                                                                                                                                                                                                                                                                                                                                                                                                                                                                                                                                                                                                                                                                                                                                                                                                                                                                                                                                                                                                                                                                                                                                                                                                                                                                                                                                                                                                                                                                                                                                                                                                                                                   |
|           |                                                                                                                                                                                                                                                                                                                                                                                                                                                                                                                                                                                                                                                                                                                                                                                                                                                                                                                                                                                                                                                                                                                                                                                                                                                                                                                                                                                                                                                                                                                                                                                                                                                                                                                                                                                                                                                                                                                                                                                                                                                                                                                                                                                                                                                                                   |
|           |                                                                                                                                                                                                                                                                                                                                                                                                                                                                                                                                                                                                                                                                                                                                                                                                                                                                                                                                                                                                                                                                                                                                                                                                                                                                                                                                                                                                                                                                                                                                                                                                                                                                                                                                                                                                                                                                                                                                                                                                                                                                                                                                                                                                                                                                                   |
|           |                                                                                                                                                                                                                                                                                                                                                                                                                                                                                                                                                                                                                                                                                                                                                                                                                                                                                                                                                                                                                                                                                                                                                                                                                                                                                                                                                                                                                                                                                                                                                                                                                                                                                                                                                                                                                                                                                                                                                                                                                                                                                                                                                                                                                                                                                   |
|           |                                                                                                                                                                                                                                                                                                                                                                                                                                                                                                                                                                                                                                                                                                                                                                                                                                                                                                                                                                                                                                                                                                                                                                                                                                                                                                                                                                                                                                                                                                                                                                                                                                                                                                                                                                                                                                                                                                                                                                                                                                                                                                                                                                                                                                                                                   |
|           |                                                                                                                                                                                                                                                                                                                                                                                                                                                                                                                                                                                                                                                                                                                                                                                                                                                                                                                                                                                                                                                                                                                                                                                                                                                                                                                                                                                                                                                                                                                                                                                                                                                                                                                                                                                                                                                                                                                                                                                                                                                                                                                                                                                                                                                                                   |
|           |                                                                                                                                                                                                                                                                                                                                                                                                                                                                                                                                                                                                                                                                                                                                                                                                                                                                                                                                                                                                                                                                                                                                                                                                                                                                                                                                                                                                                                                                                                                                                                                                                                                                                                                                                                                                                                                                                                                                                                                                                                                                                                                                                                                                                                                                                   |
|           |                                                                                                                                                                                                                                                                                                                                                                                                                                                                                                                                                                                                                                                                                                                                                                                                                                                                                                                                                                                                                                                                                                                                                                                                                                                                                                                                                                                                                                                                                                                                                                                                                                                                                                                                                                                                                                                                                                                                                                                                                                                                                                                                                                                                                                                                                   |
| CrLEA2-52 |                                                                                                                                                                                                                                                                                                                                                                                                                                                                                                                                                                                                                                                                                                                                                                                                                                                                                                                                                                                                                                                                                                                                                                                                                                                                                                                                                                                                                                                                                                                                                                                                                                                                                                                                                                                                                                                                                                                                                                                                                                                                                                                                                                                                                                                                                   |



|           |                                                                                                                                                                                                                                                                                                                                                                                                                                                                                                                                                                                                                                                                                                                                                                                                                                                                                                                                                                                                                                                                                                                                                                                                                                                                                                                                                                                                                                                                                                                                                                                                                                                                                                                                                                                                                                                                                                                                                                                                                                                                                                                                                                                                                                                                                            |
|-----------|--------------------------------------------------------------------------------------------------------------------------------------------------------------------------------------------------------------------------------------------------------------------------------------------------------------------------------------------------------------------------------------------------------------------------------------------------------------------------------------------------------------------------------------------------------------------------------------------------------------------------------------------------------------------------------------------------------------------------------------------------------------------------------------------------------------------------------------------------------------------------------------------------------------------------------------------------------------------------------------------------------------------------------------------------------------------------------------------------------------------------------------------------------------------------------------------------------------------------------------------------------------------------------------------------------------------------------------------------------------------------------------------------------------------------------------------------------------------------------------------------------------------------------------------------------------------------------------------------------------------------------------------------------------------------------------------------------------------------------------------------------------------------------------------------------------------------------------------------------------------------------------------------------------------------------------------------------------------------------------------------------------------------------------------------------------------------------------------------------------------------------------------------------------------------------------------------------------------------------------------------------------------------------------------|
| CrLEA2-53 | ATGCATGCTCAAACCTCAGAAGCCACTCGGATTTAAGTGGTATAGGGTACGTGCTCAAGTTTATAAAGAAGA<br>GGAAGACCATACAAATGGACTGCACTATGAATCTTGACTTAACCTCTTCTCACTTCGCCTACTCCAATGC<br>TAA                                                                                                                                                                                                                                                                                                                                                                                                                                                                                                                                                                                                                                                                                                                                                                                                                                                                                                                                                                                                                                                                                                                                                                                                                                                                                                                                                                                                                                                                                                                                                                                                                                                                                                                                                                                                                                                                                                                                                                                                                                                                                                                                  |
|           | ATGGAAATGGCGACAAAACATTCTTCGTCAAGACATCACACAATTCACCAAGAGACAGCCATTTACAAACC<br>CATAACCAAGAAGCAGCAAAATGGTTTCGTGTTCTTTTTCGCTTTGTCTATCTTATGTGCAGTTT<br>TATTTGGTCTTTGCATCCGTGTTGCGCGTGCAGGAGTCCAGAGGTCAAACCTAAGATCAGCTACCTTGAACAA<br>ATCAATTATAGAGCTTCGCCAGCACCTTCCCTCAACGCCACTCTGATCACCTTTCTCAGAATTAGGAACCC<br>AAATTACGGTGCCTTCAGTTATGAGAATAGCACGGTGACTGTGCTGTATGCGGGGTGAAAATATTGGTGATA<br>AGGGAATCGGCAGTGACAGAGTTAGTTACAGAGAAACCAACAAATGAATGTTACCGTGAATGTGAGGTCC<br>TCTAAGCTACCCGTTACTGGGAATCTTTTCGGGTGCCATTAATTCAGGAATGTTGAATCTCACCCGTTATGT<br>CAAATTTAGTGGCAGGTTTCATCTTCTCAAGATAATCAACAGCAGAAAGACCATAACAATTTGCTTGCACTA<br>TGAATCTCAACTTGACCTCCCACGCAATTAAGGGTATCCAATGCTAA                                                                                                                                                                                                                                                                                                                                                                                                                                                                                                                                                                                                                                                                                                                                                                                                                                                                                                                                                                                                                                                                                                                                                                                                                                                                                                                                                                                                                                                                                                                                                                                                                      |
| CrLEA2-54 | ATGCCGTCCCATCATGACCATGGCCATGTGGCTGAGCATCATCATCATCATCGAAGCCCAATACCCAG<br>AAGACTAAATACTCCTCACAAATGATAGCACCCATCCCTTAATCTGGCTAGCAGCCATTTCTCTGCACAATCA<br>TAGCCATAGGTGTTGTAATTGCAGGCATAGTAGTTTTCATTGGTTATATGGTATCCACCAAGAATCCCC<br>ATCATAAGCATCACCAATGCTCATCTAGACCTTCTCAGAACGACTATGCTGGTCTCTCAGAAACCAACT<br>TCGCATCATTGTGGTGGCACAGAATGGAATGCTAAGGCTCATGCAACTTTTTCTGACATAAAGTTCAATG<br>TTAGCTACCAAGGGCAAGGCATAGCAGTGATGGTTGCTGACCCCTTTTGATGTTCCAAAGAACAAATTCAAAG<br>ACACTCCCCTTATGTGGTTCAATCTGCTCCTATACCCTTAACCCCTGATCAGATGGAGGAAGTGGATGTTTC<br>TTGGAACGAGATATCATTTGGATTGACATTAAGGGTAGCCGCAAGAACACGGTGGAGAGTAGGACCTTTAG<br>GTTCTGTTAGATTCTGGTGCACCTTTGGAGTGTCAACTCAAGTTTCACCCTTCCAATGGTAGTTACATTCCC<br>AAACGCTGCACCTCTGAATCAAAATGA                                                                                                                                                                                                                                                                                                                                                                                                                                                                                                                                                                                                                                                                                                                                                                                                                                                                                                                                                                                                                                                                                                                                                                                                                                                                                                                                                                                                                                                                                                                                                               |
|           | ATGTCAACATCTGATAAACCCAGAAGTAGTGAAAGGGAAAGTAAGGATGGAAAACAAAAGGAAGATAATGA<br>TGAGAAGGGTGGATTCTTGTATTCAGTGAAGGGTTTCATTCAAGACATTGGTGAGAGATTGAGGAAACTA<br>TAGGATTTGGGAAGCCAACTGCAGATGTTACAGGAATACACATTCCATCAATCAATCTTGAGAAGGTAGAA<br>CTTGTGTTGATGTTCTCATAAAGAACCCGAATCCTGTGCCGATTCCCCTAATTGACATAAACTACTTGGT<br>TGAGAGTGATGGGAGGAACTAGTTTCAGGATTGATACCGGATTTCAGGTACAATCCATGCACATGGAGAGG<br>AGACAGTGAAAATTCCTCTTACTTTGGTTTATGATGACATAAAGAATACATATAATGATATAAAACCTGGA<br>AGCATAATTCCTTATAAGGTGAAGGTTGATCTCATTGTTGATGTTCTGTCTTTGGAAGGCTCACCTACC<br>TTTGAGAGAAAACCTGGAGAAAATTCCTGTTCCATACAGCCTGATGTTGATCTTGAGAAAATTCAGTTTGAGA<br>GGTTCTCTTTTGAAGAGACTGTTGCAATTCCTCATTGAAAGTTGGATAACAAGAATGACTTTGATCTTGGT<br>CTCAACTCGCTCGATTATGAGGTGTGGCTTGGTGATGTTAGCATTGGAGGTGCAGAACTTACCAAACTCGC<br>AAAGATTGTGAAAACCTGGGATCACTGACATTGATGTTCCAATTACCTTCAGACCTAAGGATTTTGGTTCTG<br>CACTTTGGGACATGATTAGAGGAAGGGGTACAGGATACAGTATTAAGGACATATTGATGTTGACACTCCT<br>TTTGGAGCAATGAAATTGCCCATTAACCAAGAAGGTGGTACTACCCGCTCTCAAGAAGAAAAGGAAGATGG<br>TGAAGATGATGAGGAGGTTTGTAACTCTTATTATCTATGTTTCTTATTTACTCAATTCCTTTTAAAGTTGT<br>ATACCAGTGATTTATACATTTGTATGTGGAATATTGTCTTTAATCATAAGGGCATAGTACATTCTACCCT<br>TTGAAGTTCAACAACTTCATCTGAAGTTTATTTTATTTTATTTTACATTACTCTTACCTCCCTTATCTTAC<br>AACTTCATAAAAATTTGAGAAAGGTTCTATAATCTAGAAAGATATATAAGGTTATGTTGTTAGATAAATTA<br>AGCAAGATTTGTGTAGGGTAAAAAAGCTATCAGATAAAAATTTTATATCTCTTTAGGAGGTATGAATATAA<br>TTTGCCTTAATCATAAATGACAATAGCTAATCTTTCTTACTTATGTTTATGCGTATGTTTGGCTTGTGAT<br>ACCGGAAAGTTTCATTTCAAAAATAGATTTTAACTGGCCTAGTTTTCAGCGCATCAGTATATAAATCTGTCTA<br>GGATGTCATTTGCAACCCTGACAATAAGAATTGTATCAGTCCTTGACGTTTACTTTTAAATTCACCTCACT<br>ATTTATCTTGAAATTTGTGTCTCAGTAGAATTTGATACCACCCTGCTATCTGTAAATCTTTTAAAGTTTG<br>ACTAAAACGCAATTCATTACTGTAGGAGCCTGATTGGAATTCAGTTTATGATTCTTGTTTGGCAGAAATTC<br>AATATCGACATAGTGGAGATGCTCAGAAACAAGTCAAATAATATTTTCTGCTTAGTTGGAATCCGAGAA<br>CCGATTTAATGAATAATTTGTTGACTGAATCTCATATTAATAAAAAAAAAAAATCTTAAATGAAAAGGGAT<br>GCTTCTCAAACTCACTCTTGAAGGAGTCTCCTTTAACTTGAATGAGTAGTGTGTTTGGTATATCCAGTT<br>GGTATTCCTAGCTTAAAGACTAATCTCTTCTTGGAGCGTTTACCTTTTCCAACAAGTCTTTTACTTTTTTA<br>TGTTTAAAGTATTTTGAAGTATTTATATCTTTTCTTTTAACTGACTAAGCAGGTCAATAATTTGTTATCT<br>ATATCTTCGCTTGTGCTATAAAATTTAAGCCTTCAATCTTTTCTTTTGCAGGATTGAAGAAGAAATGGCAGC<br>CAGTTATAGTATCTGTTCTTTTATTACAGCTTAG |
| CrLEA2-55 | ATGCTTGCACTTCCACCACCCCCACCACCACCACCATCACTACCATCACCACCATCCCTAGCCATAAGGCA<br>AACCAGCAAGTTTCTCCTGGCCAAATTTGCAAAATCAAAACAGCCCATAGACAAAATTTCTCAAGAATTAG<br>AAGCACCAGATTATACTACAACAAAGTCAATTAGGCCACTACCAAGATTAAAGCAACCTCCATTTCAAAGG<br>ACCAACCAATAATATGGTTTGGTGCAGTGTGTGCTCATTTTTCAGCCTTGTGCTCATCTCTTTTGGAGT<br>TGCAACTTTGATCATCTTCCCTGCCATCAAACCAAGAAATCCAACCTTTTGACATCCCAATGCAACCTCA<br>ATGGATTGTATTTTGACTCACCAGAATACCTCAATGGTGACTTCACTCTCCTTGTAATATATACCAATCCC<br>AACAGGAAAATGGATGTGAGGTTTGGAGTCTTGGATGTTGATCTTTTCTTCTCAGATAGGATCATATCAAC<br>ACAGTCAATTACGCCCTTTTACTCAAAGGAGAAAGGAAAGCAGGTTGGAATCATTGCATCTTATCCAGTT<br>TGGTGTTTTTGCCTGAGGATCTTGGTGTGAATCTTAAAAAGCAGGTGCAAGGTAACAGGGTTAACTACAAT<br>GTGAGGGGAACCTTTTAAATGAGAATAACTATGGGCTTCTTCCATTTATCTTATTGGCTGCATAGCAGATG<br>CCAGATAGAGATGACTAGTCCACCAACTGGGGTCTTGATAGCTAGGAACTGCATCACAAGAGATGA                                                                                                                                                                                                                                                                                                                                                                                                                                                                                                                                                                                                                                                                                                                                                                                                                                                                                                                                                                                                                                                                                                                                                                                                                                                                                                                                                                                                                                               |
|           | ATGTCAGATCATCAAAGAATTCATCTGTTTCATGATGTGGAGGCACCACAGACCCCTTGGTGCCAAAGTAA<br>CATTGGTAAATCAGATAAAGATGTTCAACCTCTTCTCCTCAACGCACCATTCTGTGATGCATTCAAAGCCAC<br>CAAAGAAAAGAACTGTTGCTGCAGGGTTCTATGTTGGACATTAAGCGTATTGGTGATTTCTATAAATTGCT<br>CTTGCCATCACCATTGGGATACTATTCTTGTGTTTAGGCCAAAGCTTCCCAAACTACTCAGTGGACCAACT<br>GAGAATAAGCCAATTCATGTTTCTGACAACAATAGCCTTTATGCTACCTTCAATGTGACAACTCACTGCAA<br>GAAATCCAAACAAGAAAATTTGGGATATACATGAGGGTGGAAAGCCACATAAGTGCTTGGTATATGGACACA<br>CAACTATGTGAAGGTCCTTTGCCAAAGTTCTACCAAGGTCACAGGAACATCAGTGTCTTAATCTGTTTTT<br>GACTGGTCAAGCACAGGATGCAACTGGCTTACAAAGTAGAATTCAGGAGCAGCTGCAGCAGACAAATAATA<br>TTCCCTTAACTTAAAGTTAATCTGCCTGTGAGGTTAAGCTTGGTAAATGAAAGCTCTTCAAAGTCAAA<br>TTCAGAGTTAGGTGCAGGCTTGTGGTGGATAATATTGGTGCTAATAATGATATTAAAAATTCAGAGTAGTAG<br>GTGTAAGTTCAAGCTTAGGCTATGA                                                                                                                                                                                                                                                                                                                                                                                                                                                                                                                                                                                                                                                                                                                                                                                                                                                                                                                                                                                                                                                                                                                                                                                                                                                                                                                                                                                                                                                                                     |
| CrLEA2-56 | ATGTCAGATCATCAAAGAATTCATCTGTTTCATGATGTGGAGGCACCACAGACCCCTTGGTGCCAAAGTAA<br>CATTGGTAAATCAGATAAAGATGTTCAACCTCTTCTCCTCAACGCACCATTCTGTGATGCATTCAAAGCCAC<br>CAAAGAAAAGAACTGTTGCTGCAGGGTTCTATGTTGGACATTAAGCGTATTGGTGATTTCTATAAATTGCT<br>CTTGCCATCACCATTGGGATACTATTCTTGTGTTTAGGCCAAAGCTTCCCAAACTACTCAGTGGACCAACT<br>GAGAATAAGCCAATTCATGTTTCTGACAACAATAGCCTTTATGCTACCTTCAATGTGACAACTCACTGCAA<br>GAAATCCAAACAAGAAAATTTGGGATATACATGAGGGTGGAAAGCCACATAAGTGCTTGGTATATGGACACA<br>CAACTATGTGAAGGTCCTTTGCCAAAGTTCTACCAAGGTCACAGGAACATCAGTGTCTTAATCTGTTTTT<br>GACTGGTCAAGCACAGGATGCAACTGGCTTACAAAGTAGAATTCAGGAGCAGCTGCAGCAGACAAATAATA<br>TTCCCTTAACTTAAAGTTAATCTGCCTGTGAGGTTAAGCTTGGTAAATGAAAGCTCTTCAAAGTCAAA<br>TTCAGAGTTAGGTGCAGGCTTGTGGTGGATAATATTGGTGCTAATAATGATATTAAAAATTCAGAGTAGTAG<br>GTGTAAGTTCAAGCTTAGGCTATGA                                                                                                                                                                                                                                                                                                                                                                                                                                                                                                                                                                                                                                                                                                                                                                                                                                                                                                                                                                                                                                                                                                                                                                                                                                                                                                                                                                                                                                                                                     |
| CrLEA2-57 | ATGTCAGATCATCAAAGAATTCATCTGTTTCATGATGTGGAGGCACCACAGACCCCTTGGTGCCAAAGTAA<br>CATTGGTAAATCAGATAAAGATGTTCAACCTCTTCTCCTCAACGCACCATTCTGTGATGCATTCAAAGCCAC                                                                                                                                                                                                                                                                                                                                                                                                                                                                                                                                                                                                                                                                                                                                                                                                                                                                                                                                                                                                                                                                                                                                                                                                                                                                                                                                                                                                                                                                                                                                                                                                                                                                                                                                                                                                                                                                                                                                                                                                                                                                                                                                        |
| CrLEA2-58 | CATTGGTAAATCAGATAAAGATGTTCAACCTCTTCTCCTCAACGCACCATTCTGTGATGCATTCAAAGCCAC                                                                                                                                                                                                                                                                                                                                                                                                                                                                                                                                                                                                                                                                                                                                                                                                                                                                                                                                                                                                                                                                                                                                                                                                                                                                                                                                                                                                                                                                                                                                                                                                                                                                                                                                                                                                                                                                                                                                                                                                                                                                                                                                                                                                                   |

|           |                                                                                                                                                                                                                                                                                                                                                                                                                                                                                                                                                                                                                                                                                                                                                                                                                                                                    |
|-----------|--------------------------------------------------------------------------------------------------------------------------------------------------------------------------------------------------------------------------------------------------------------------------------------------------------------------------------------------------------------------------------------------------------------------------------------------------------------------------------------------------------------------------------------------------------------------------------------------------------------------------------------------------------------------------------------------------------------------------------------------------------------------------------------------------------------------------------------------------------------------|
| CrLEA2-59 | CAAAGAAAAGAACTGTTGTGTCAGGGTTCTATGTTGGACATTAAGCGTATTTGGTGATTCTTATAATTGCT<br>CTTGCCATCACCATTGGGATACTATTCCTTGTGTTTAGGCCAAAGCTTCCCAAATCTAGTGGACCAACT<br>GAGAATAAGCCAATTCAATGTTTCTGACAACAATAGCCTTTATGCTACCTTGACAAATGTGACAACTGCTGCA<br>GAAATCCAAACAAGAAAATTGGGATATACATATGAGGGTGGAAAGCCACATAAGTGTGTTGGTATATGGACACA<br>CAACTATGTGAAGGGTCTTTGCCAAAGTTCTACCAAGGTACAGGAACATCAGAGTCTTAATCTGTTTTT<br>GACTGGTCAAGCACAGGATGCAACTGGCTTACAAAGTAGAATTCAGGAGCAGCTGCAGCAGACAAAATAATA<br>TTCCCTTAATCTTAAGGTTAATCTGCCTGTGAGGGTTAAGCTTGGTAAATTGAAGCTCTTCAAAGTCAAA<br>TTCAGAGTTAGGTGCAGGCTTGTGGTGGATAATATTGGTGCTAATAATGATATTAATAATTTCAAGTAGTAG<br>GTGTAAGTTCAGGCTTAGGCTATGA                                                                                                                                                                                                                |
|           | ATGACTGATCCAGTTCATCTGAAAAACTCGCCCCACAATCCAACGACGCACAAACGTCGCCGCCTCATGA<br>AGCTGCCGTACCTCAAATTCTCTCTCTGCGGCAACCTACGTCATCCGTATCCCCAAGGACCAAGTCT<br>ACCGCGTTCCCTCGCGCGAAAATGCTCTTTCGCTACGCCAATACAGCCCGCGGAAAAATCGTCGATCCCGG<br>TGCTGCTGTTGCCTCTGCTGTTTCATCTCCATCGTCTTCTCCCTCGTCGTTCTCCTCGCCATTGCCTCCGG<br>CGTCTTCTACTTCGTTTTCCGACCAAAGGCGCCCCGACTATGCAATCGAGCGCGTGGCCGTGAAGGGAATGA<br>ACCTCACGTCGCCGTCGTTTACAGCGGCATTATCACCGGAGTTTGACGTCAGTGTTCGGGCAGACAACGAT<br>AATAGCAAGATCGGAATCTACTACGAGGATGGAAGTTCCCTTGAAATGTTCTACAATGACACCTAGGCTCTG<br>TGATGGTGCATTGCCGCGTTTTATCAGCCGTCAAACAACGTGACGGTGTTCGATACGGTTTTGAGGGGTA<br>ACGGCATCGCACTCACGACATCGGACCAGACAGCATTGGTGAATGACGTTGCCAAACAGAGCGTGCCTGTA<br>ACGTTGAAGCTGAGGGCACCGGTGAAAATTAAAGTGGGATCTGTTAAGACGTGGAAGATCACTGTTAAAA<br>TACCTGTGATGTGACTGTAGATCAGTTAACGATGAAGGCTAGGATGTTTAAACAAGGATGTAGATACCTGT<br>TGGCTCTTTGGTGA |
| CrLEA2-60 | ATGGCCGACCGAGTTCATCCCAAAAACCTCGCCCCACAATCCAACGACGCACAAACGTCGCCGCCTCATGA<br>AGCTGCCGTACCCACAAAACCCCTCGTCGCCGCGGCAACCTACGTTATTCGTATCCCCAAGGACCAAGTCT<br>ACCGCGTTCCCTCGCGCGAAAATGCTCATCTACGCCAATACACCCCGCGGAAAAATCGTCGATCCCGG<br>TGCTGCTGTTGCCTCTGCTGGTTTCTCCATCGTCTTCTCCCTCGTCGTTCTCCTCGCCATTGCCGCGCGG<br>CGTCTTCTACTTCGTTTTCCGACCAAAGGCGCCCCGACTATACAATCGAGCGCGTGCCTGTAAGGGAATGA<br>ACCTCACGTCGCCGTCGTTTACAGCGGCATTATCACCGGAGTTTGACGTCAGTGTTCGGGCAGACAACCGC<br>AATAGCAAGATCGGAATCTACTACGAGGATGGAAGTTCCCTTGAAATGTTCTACAACGACGCTAGGCTCTG<br>TGACGGCTCATTACCGCGTTTTATCAGCCGTCAAACAACGTACGATGTTTCGAGATGGTGTGAGGGGTA<br>ACGACATCGCACTCACGGCATCGGACCAGACGGCGCTGGTGAATGACGTTGCCAAACGAGCGTGCCTGTA<br>ACATTGAAGCTGAGGGCACCGGTGAAAATTAAAGTGGGATCTGTTAAGACGTGGAAGATCACTGTTAGTAT<br>TGACTGTGATGTGACGGTAGATCAGTTAACGCGGAAGGCTAGGGTGTGTTAACAAGGATGTAGATACCGAT<br>TGGCTCTTTGGTGA   |
|           | ATGGCCCGCTCTCTCTCACAAACCCACCGTCTTGGTTTCATCGTTGCCCAATCTATCTCCCTAATACCTGT<br>TTATCGGTCAGTTCATTTTTTTGAAATATATTTTTCAATTCATTTCACTTAAATACCTTACTGCCTGTCTC<br>TGCTCGCCCTCATAAAATTAGCAATTTAGTACTTTTGTAATATTTTGGTAAATTATCCAAAGGGAATTAGTTA<br>TAATTTTATTGGCAATATGACGTTTGTGCCCTACATGGTTGTAATTTTAAATGAAGAGTAAATAAATATTTT<br>CTGAGTCCTTTTCTATATATATATCATTATTTGTGTACATAAACTAATTTTACCGTTTGCAACACTTGCTA<br>TGATTATTATGATAGGCGAGGTTATTCAGCCGCTCAGATGTTTTAGGAAGAGTTGGATTGGGTATTATTG<br>CACGCAGGATGGGAATGTTGGGAAGGACAGAGGAAGCCGTGTAACAAGAGATGGTTTCGGAGGCTACTCG<br>GCTTGGGCCCCGTGACCCAGTAACGGGTTATTATCGGCCCATCAACCACACCCCTGAAATTGACGCGGTGGA<br>TCTTCGCCAGATGCTTCTCAACCACAAGCTTAGATCACCCCACTAG                                                                                                                                                                                           |
| CrLEA3-1  | ATGGCTAATTTCTTCTCAGGTAAGTCTAGCTCTATTTCTTTTGTCTTGTATGTGCCATTATTTTTGGTGA<br>CAACACATATATACACTGTTATATTTAATTCAAATCAATATTTTCACTTAAATACCTTATTAAATTTAAT<br>TACTGATATGAAACATCAATTGTAATTGGGCATAAAATGTATCTAACTTTCTCATTATTTTTTCTCCTTT<br>ATTTAATTTTTTTTTTACTACGAACCTATATATATATATATATATATATATATATATATATATATGTAAT<br>TAATATCAAGACATGATGCAGGAAGCGATGTTATGGTGTGTAGCGGAATGTTTAAAGTTGGAGATGGA<br>AAGACGATGGTGAAGGCGAAAGCAGCATCCCCAAATGGTAATTCAAATAAGATGAAATCTTTGGATGA<br>GAGATCCTAAGAGTGGAATTGGATTCCAGAGAATCATTTTGGCGAAGTTGATGCTGCCGAGCTGAGGAAC<br>AAGTTTCTGCCAAGACACACAAAACCTTCCCAATCACTTAAGTAA                                                                                                                                                                                                                                                                                    |
|           | ATGGCTCGCTCTTTCTACTAACGCCAAGATTTTCTCTGCTGTCGTCCTTGTATGGATTCCCTAGCGTTTTTCAC<br>CAGTACCGTAATTTTGATTGATCTTTGTTGTTATGAATATTTAAAGGTAATTAGGGAATGGCATGATTT<br>ATAATATATGGTTTTTTATACAGACGTGGGTACGCGGTAGCAACACAAAGCGCAACAAGGGGAGGAACGGCC<br>TCTATAAGCGGCAAGGTGGCACCCAAAGGCTGTGGAAGACAAAGTGCCCTCCAACAACAAGTTTCGTGGGT<br>GCCAGATCCTGTTACTGGTTACTACAAACCCGAGAACATCAACGAAATTGACGTTGCTGAATTGCGCCAGA<br>CCCTTCTACGCAAAAAAATTCACAACATGA                                                                                                                                                                                                                                                                                                                                                                                                                                            |
| CrLEA3-3  | ATGGCTCGCTCTTTTCGCCAACGCCAAGGTTCTCTCTGCGCTCGTAGCCGACGGATTCTCCAACACTCTTAC<br>CAGGTAAAAAACAGAGACGGGTTATCTATTTTTTAAATTCAAACTTGCTTTCCCTTATGTGCTATGCGATTT<br>GCGCAAGTTTTTAATCCGAAGAGGATTCTTGTGTGAACGGTTTTTATTTATTAATTTGAAATTGACTCGGTA<br>TGATTTTGTGTTGAGAGCAGACGTGGTTACGCGGCGCGACACAAAGCGCAACAAGGGGAGGAGCTGCCTC<br>CATTAGCGGCAAGATAGCCCCAAAATCAGGGGAAGACAAAGTGCCGCTACTGAAAGGTGTCGTGGGTCC<br>CAGACCCCGTTACTGGTACTACAAACAGAGAACACCAAGAAATTGATGTTGCTGAGCTGCGAGCAACG<br>CTTCTCGGCAAAAAAATTCACCTCTAA                                                                                                                                                                                                                                                                                                                                                                         |
|           | ATGGTTAGAAGCGGCATCACCAAAGCAAAACATGTTGCTTCTCCGGTAAAAATTGAACCTAATTATTAACCTC<br>CTTAATGATCAATTCAAAGTTGTTGTCATTTAAATACTTCAATCGGTGCCCCCAATGGATCCCATTCTCT<br>TTTCATTTTAGCAGTTTAATTGTTTGAATCAATATTTCTTAACCATGATTAATTTGTCCATTTACATGTT<br>AATTATTGATTGGAGAGATTTTTTTATAGCCAAACCCCTTTTCAGATTTTTCATTGTGTTTGAAACCTGA<br>AGATACATAACAAACGCAATGTGAAGGTCTGCAAGGGAACTGAGAGAGCAAAAGATGGACTGAGCAAGTT<br>GTTACCTGCTGCTACAGAAAACCTCGGAGGAATTTCAAAGAGTAGTGGGAAGATGGAATAATTCAGAAATGT<br>GGGTCCCACATCCACGCACAGGAATTTATTTCCCAAAAGGCATGAATGGGTGATGGATGATGTTCCAGAG<br>GATGCAGCTCGTTTAAAGTCAGACTCACTGGTTCAGAAATATTTGATGGTGTGGACAATCCCAATACCAAC<br>TTGA                                                                                                                                                                                                                                         |
| CrLEA3-5  | ATGGCATGCTCTTTTCGCACAAGCCAAACGCGTCTCGCTTTTCGCTCTTCATCGGTTGCTTCTACTTTCATG<br>CAATTAACGCCCAGTCTTGTTCCTTCTTCATGTTTCTTTAACAATTTTATCAATATCTCATGTGCGATT<br>TCAGTCTCTTTTTTTTCTATAACATACATATTAATAAACTAACAATTTTGCACGTTTCGTTAATTTTTAT<br>ATTTTAAATAAAATAGAGAATATTTTTTATTTCTCTGCTATCGCAATTATTTGTTGTTAGTGTGTAAT                                                                                                                                                                                                                                                                                                                                                                                                                                                                                                                                                                |
|           | ATTTTAAATAAAATAGAGAATATTTTTTATTTCTCTGCTATCGCAATTATTTGTTGTTAGTGTGTAAT                                                                                                                                                                                                                                                                                                                                                                                                                                                                                                                                                                                                                                                                                                                                                                                               |
| CrLEA3-6  |                                                                                                                                                                                                                                                                                                                                                                                                                                                                                                                                                                                                                                                                                                                                                                                                                                                                    |

|          |                                                                                                                                                                                                                                                                                                                                                                                                                                                                                                                                                                                                                                                                                                                                                                                                                                                                                                                                                                                                                                                                                                                                                                                                                                                                                                                                                                                                                                                                                                                                                                                                     |
|----------|-----------------------------------------------------------------------------------------------------------------------------------------------------------------------------------------------------------------------------------------------------------------------------------------------------------------------------------------------------------------------------------------------------------------------------------------------------------------------------------------------------------------------------------------------------------------------------------------------------------------------------------------------------------------------------------------------------------------------------------------------------------------------------------------------------------------------------------------------------------------------------------------------------------------------------------------------------------------------------------------------------------------------------------------------------------------------------------------------------------------------------------------------------------------------------------------------------------------------------------------------------------------------------------------------------------------------------------------------------------------------------------------------------------------------------------------------------------------------------------------------------------------------------------------------------------------------------------------------------|
| CrLEA4-1 | <p>TGGTGTGTATGGTTATGGATGTATTTATATAATGTTATGTATGCATGTGTATTGGCGGTGTTACAGGCGAG<br/>GGTATGCAGTGTATGCTGTGCTTCGGTGAGAGGGGGATTGGATAGGATTGGGAGTGGGAGTAGGAGTAGG<br/>AGTGGATCAACGGTGGTGGGAAGGTTGAAGAGAAGAGTGTGTCCAAAAGTGGTTCGGAGGGTTCTTCACG<br/>TTGGGCCCCAGACCCAGTACCGGGTACTACAGGCCCATCAATCACACCAATGAGATTGACCCGGTGGAGC<br/>TCCGAGAGATGCTTCTGAATCACAGAGTCAGATCTTCATCCCCTTAA<br/>ATGGCGTTCGAGGCAAGAATCAAGGAAGACAGAGCGGAAGCAGCAGCAAAAGCTAGCTGCGAAAGACATTGG<br/>CCATGTGAACAGAACAAACGAGCGTGAGGAAAGTTACACACTGCATTCGATATTCACCTTAAGGAAGCAC<br/>GAGCGGAGGCAGCAGCGAAGCTTGCTGCTAAGGATCTTGAAGACGTTAACAGAGCAAGAGAGAGTGCAATTT<br/>CGTGAAAAACAACGTTATTGTGATGAGCAGAAACCCGGTGTGATAGGGTCCATGTTTAGAGCCGCGAAAGA<br/>AGCTGTGGTTGGCAAGCCTCACGAGGGTGTGGAAGTGAGGGATAGAGGTACCTCACCTGGGTTTTATGATT<br/>ACACCACCAGAAGACCACCGAAACAAAGGATGCAACGAAGCAAAAGGCTGGGGAATATGCAGATTATACG<br/>TCTCAGAAAGCGAAAGAAGCAAAAGACAAAGCAGGGGAGTACAAGAACTATGCTGCAGATAAAATGAAGGA<br/>AGCTGGAGATGCGACAATGAACAAAGCTAAGGAAGCTAAAGACGCGACGATGCAGAAGGCAGGTGAGTATA<br/>AAGACTATACAGCTGAGAAGACAAAGAAGGGACGGAGAGTGCAGCGGGGAAGCTTGGGGAGCTGAAGGAT<br/>TCTGCTGCTGATGCAGCCAAAAGGGCTATGGGTTTCTTCGCTGGCAAGAAAGAGGAACAAAGGTTTTCAA<br/>GAGTTGAATATTTAATCATAATGTAATGTTTAAATATTGTATAATTAAGATGTGATTGTGGTGCAGG<br/>AAAAGCTGAGCGGAACAGAGGAAGAAGCGATGAGGAAAATGGAACATGTGAAGGTGGAAGATAGGAAATAT<br/>GGAGGAGGAGGAGGAGGAAAGATGGAGATAAAAGTGAAGAGTCTCGGCCAGGGGCAATGGTGGATGTGCT<br/>ACGGGCTGCAGATAAGGCTCTGAACAATGTGGGACGGTTGGATGAAGAAGGTGTGATTCTATGTGGAGCGTG<br/>GTCGTGAGAAAAATGTGA</p>                                                                                                        |
|          | <p>ATGGCGTCAAGGCAACAACCCGAGGACAGAGCCGAGGCTGCAGCCAAAGTTGCTTCTAAAGAACTCGAGCA<br/>AGTTAAACAAGCCAGAGACCATAATTTGGCTATCGAGGACCAACAACAACATGACCAAGAAAAGCGTGGTG<br/>TAATTAGCTCCGTTCTAAGAGCAGTGCAAGGAACCTACGAGAACGCAAGGGAGCAGTGGTTGGCAAAAAA<br/>GACCTGCGGATCCCTATACCACAGAGGTAGTTTCATCATGTTAACGTTGAGGATGAAGATGACGACACCGG<br/>AGAAGTTAGAGACATATCGCCAAACAAGCAGGTTCTAAAGTTGGAGAGTATGCAGATTACGCATCTCAGA<br/>AAGCCAAGGAAACAAGGATGCAACGGCGCAAAAGGCGGAGAGTACGCCGATTATGCATCTCAGAAGGCCA<br/>AAGGAAGCTAAGGATAAGACAATGGAGAAAGGTGGAGAATACAAAGACTATGCCCGCAGAGAAAGCGAAGGA<br/>AGCGAAAGATGCGACAATGAATAAGGCAGGGGAGTATAAGGATTACACCGCTGAGAAAACGAAAGAGGAA<br/>AGGACACAACGATGGGGAAGCTTGGAGAGTTAAAGGACTCTGCTACTGATGCTGCTAAGAGAGCTGTGGAT<br/>TACTTGAGCGGAAAGAAAGAGGAAACAAAAGAGAAGGCTGCAGAAACTGCAGAGGCGACCAAAAAATAGAAC<br/>GTCGGAGACTGCTGAGACGGCGAAGAAGAAAGCTACGGAGATGAAAGATGCGGCAAGGAAAAAGCTGCAG<br/>AAACCACCGAGGCGACCAAAAAATAGAACTTCCGAGACTGCTGAGACGGCAAGAAAGAGCTGCGGAGATG<br/>AAAGATGCGGCGAAGGACAAAGCTGCAGAAACCACCGAGGCGACCAAAAAATAAACTTCCGAGACTGCTGA<br/>GACGGCGAAGAAGAAAGCTACGGAGATGAAAGATGCGGCGAAGGACAAAGCTGCAGAATCCACCGAGGCGA<br/>CTAAGCAGAAAACTGCAGAGGCCAAGGACAAGACGAAGGTCTCACCTTTAATTTAATTATTAACCATATTA<br/>ATCAGTTATAACAAACTGATTGAATCGATTATAACTACCTGATACACGTATGTGCCACAGATGTGGCAGCATA<br/>GTAACACGCTGTTTTAACATATTTTAAATGTTTTGATGTGGATGCAGGAAAAATGTGAGTGGAGGAGGGGAA<br/>GAAGATACTAGAAGGAAAAATGGAAGAACTCAAGGTGCACGGGAAAGGATACGGGTGAGGAACCTGAGCGGCG<br/>TGGTGGAGATAAGGTGGTGTGAGAGTCAAGAAAGTCAACCGGAGCGGTGGCGGAAACGCTGAAAGCCA<br/>CGGATCAGATGACGGGCGACCTTCAATGATGTGGGAAGGATGGATGATGAAGGGGTCAATCAATGTGGAG<br/>CGACGTAACAAATAA</p> |
| CrLEA4-2 | <p>ATGGCATCAAAACAACAAAATCGACAAGAACTTGACGAGAGGGCAAGCAAGGAGAACTGTAGTTCTCTGG<br/>TGGCACTGGTGGCAAGAGCCTTGAGGCTCAACAACATCTTGCTGAAGGTTATCATCAATCTATCAAAATATT<br/>ATAACCTTAATCTTTTTCTACTTTTTCTCATATTTATGTTATATATATCATCTCTCTCTGTCACCTAT<br/>ACTTTTTTTACATCATTATTTATTTATTAATTTATTTCTGTCTCTTTTTGTTTTTATATCACTGTTATTTATT<br/>AAATTTATAATTTTTTATTTTTATCTTAAATATTTATTACATTTTTAATACTCTATTACGTCATATTTTAT<br/>TACCATTCTATTTATTGTTTAAAGATACTATTACAATTTTATATTACTATTATTTATTAATTTATTTTTTC<br/>TTTTTATCTCTTAAAGAATGTTACATAATTACATCATCATTTGTTATTTTTCTTTCTTTCTTTCTGTTG<br/>TCTTCCAATTTATTTTTTATTTTTATGTCACTGGTCTTCCAAATTTATTTCTTATATTTTTTTTTATCTTT<br/>TATTAGATACTAATACATTTATCATTTTTCTATTTTATCTTTTTCTTTTTGTCTACTGATCTTCTATTATA<br/>TTTTTTCTTCTATATTTTTCTGTCAAGATATATATATATATATATATATATATATATATATATATATATAT<br/>TGTTGTGAGTGAAGTGAAGTATCTGTGTTTGTCTTTTGGTTTGGTAATATGATTTTATTTTATTTTGTG<br/>ATTGTGTAATAACAGGAAGGAGCAGAGGAGGGCAACAAGGAAGGAGCAGCTGGGAACAGAAGGGTACCA<br/>AGAGATGGGTGCGAAAGGTGGATTGAGTTCTATGGACAAATCAGGTGGAGAACGTGCTCAAGAAGAGGCA<br/>TTGACATTGATGAGTCTAAGTTCACACTGCTTCTAGGAAGTGA</p>                                                                                                                                                                                                                                                                                                                                                                                                                                                                                                                              |
|          | <p>ATGAACCTTTCTTCTTTCTACTTGTTGTGAGCAATCATAAAGTTTTTCCCTTGGCTAACACTCGTAATTATCA<br/>TCCTCATTCAAGTTCCTTGCAAAGGCAAAAAAGAGTCCTTAGAAGAAAAGGTTTGAGTGTGAATAACATGG<br/>CATCTCAGCAACAAAACCGTGAAGAGCTTGATGAGAAGGCAAGGCATGGTGAAACTGTGGTTCTCTGGAGGC<br/>ACTGGTGGGAAGAGTCTAGAAGCTCAAGAAAACCTTGCTGAAGGCGTTGATTCAACCCCTATATCTTGCAA<br/>GAACACACATATGTTAACCTTTTTTTGTTTATTGAAGTAATGTGATTTTATGATGTGTAGGAAGGAGCCGT<br/>GGAGGGCAACAAGGAAGCAGCAGCTAGGATCAGAAGGGTATCATGAGATAGGAACCAAGGAGGGCAAAAC<br/>AAGGAAGGAACAGATGGGAACAGAAGGGTACAAAGAGATGGGGCGCAAGGAGGGCTTAGCACTATGGACA<br/>AGTCTGGTGGAGAGCGTGCTGAAGAGGAAGGCATTGACATTGATGAGTCTAAGTTTAGGAATCACTAA<br/>ATGGCAAAACAACGGGAAGCAAGTGAACACAAAAACAGGAGTGCCCTAATGCTCAAGAGAAAGGAAGAT<br/>AGAAATGTTGCCTTTGGAAATTAGTCCATGCGTTAAATACAATGATGTACAAAAAGAATACAATCGCAATG<br/>CTTATGACACACAACGCCATCTTCAGCCAAAACCAACCAAGCAGGTGGAACACACACATTGCTCCTACT<br/>CCCTCAGATGCTCCATTGAAATTAACCACTAAATAG</p>                                                                                                                                                                                                                                                                                                                                                                                                                                                                                                                                                                                                                                                                                           |
| CrLEA5-1 | <p>ATGGAGAATCAAACCTGAGAAAAAGGAGAGTGAAATCAGGTAAAGAAGGACTTCCGATGAAGGATAGTCC<br/>TTACCTGCAATACAAAGGATGTGGAGGACTATAAGCGTCAAGGTTATGGCACCCATGGTCAACAAGAACCAA<br/>ACCCAAATCAAGGAGCTGGTGCCACTGAGGCACCCACTCTCTCTGGTGCTGCTGTTTCTCTGAATCTGAA<br/>TTCAAAGCCACTGATGCCATTAATCGCAAGGGAGTCCCTTAATTAACAATATCTACCGTTCCCTTTATGTAA<br/>TAACAAATACTTTTTCTTATCTTGTGTTTCTTTAGTTGTTGTTGTTAGATCATATGTTTAAATTTGCA<br/>TTTTAGTATTACCCCAAAAAAATAGAATAACATTTGCATTTAGTATGTTGTTATTTGCTTATAACACGTTGC<br/>GGATGTTGTAGAACTTTGCTATGTAAGAATTGAACGAGCAATTATCAATCTTTTCTTTTTTCCCTTCTCTC<br/>TCACTCTTAAGGAAATACTATTTATCGTTAGCAGTGGAAGAAAATATCACTTTCTCTATTGATTTTTT<br/>CGCTCTGCTGTTGTTTTTACAATTTGGGAAGCTATTTTGAATTTTTTCTTTGATGAAGGATGCTAAG</p>                                                                                                                                                                                                                                                                                                                                                                                                                                                                                                                                                                                                                                                                                                                                                                                                                                                                                               |
|          | <p>ATGGAGAATCAAACCTGAGAAAAAGGAGAGTGAAATCAGGTAAAGAAGGACTTCCGATGAAGGATAGTCC<br/>TTACCTGCAATACAAAGGATGTGGAGGACTATAAGCGTCAAGGTTATGGCACCCATGGTCAACAAGAACCAA<br/>ACCCAAATCAAGGAGCTGGTGCCACTGAGGCACCCACTCTCTCTGGTGCTGCTGTTTCTCTGAATCTGAA<br/>TTCAAAGCCACTGATGCCATTAATCGCAAGGGAGTCCCTTAATTAACAATATCTACCGTTCCCTTTATGTAA<br/>TAACAAATACTTTTTCTTATCTTGTGTTTCTTTAGTTGTTGTTGTTAGATCATATGTTTAAATTTGCA<br/>TTTTAGTATTACCCCAAAAAAATAGAATAACATTTGCATTTAGTATGTTGTTATTTGCTTATAACACGTTGC<br/>GGATGTTGTAGAACTTTGCTATGTAAGAATTGAACGAGCAATTATCAATCTTTTCTTTTTTCCCTTCTCTC<br/>TCACTCTTAAGGAAATACTATTTATCGTTAGCAGTGGAAGAAAATATCACTTTCTCTATTGATTTTTT<br/>CGCTCTGCTGTTGTTTTTACAATTTGGGAAGCTATTTTGAATTTTTTCTTTGATGAAGGATGCTAAG</p>                                                                                                                                                                                                                                                                                                                                                                                                                                                                                                                                                                                                                                                                                                                                                                                                                                                                                               |
| CrLEA6-1 | <p>ATGGAGAATCAAACCTGAGAAAAAGGAGAGTGAAATCAGGTAAAGAAGGACTTCCGATGAAGGATAGTCC<br/>TTACCTGCAATACAAAGGATGTGGAGGACTATAAGCGTCAAGGTTATGGCACCCATGGTCAACAAGAACCAA<br/>ACCCAAATCAAGGAGCTGGTGCCACTGAGGCACCCACTCTCTCTGGTGCTGCTGTTTCTCTGAATCTGAA<br/>TTCAAAGCCACTGATGCCATTAATCGCAAGGGAGTCCCTTAATTAACAATATCTACCGTTCCCTTTATGTAA<br/>TAACAAATACTTTTTCTTATCTTGTGTTTCTTTAGTTGTTGTTGTTAGATCATATGTTTAAATTTGCA<br/>TTTTAGTATTACCCCAAAAAAATAGAATAACATTTGCATTTAGTATGTTGTTATTTGCTTATAACACGTTGC<br/>GGATGTTGTAGAACTTTGCTATGTAAGAATTGAACGAGCAATTATCAATCTTTTCTTTTTTCCCTTCTCTC<br/>TCACTCTTAAGGAAATACTATTTATCGTTAGCAGTGGAAGAAAATATCACTTTCTCTATTGATTTTTT<br/>CGCTCTGCTGTTGTTTTTACAATTTGGGAAGCTATTTTGAATTTTTTCTTTGATGAAGGATGCTAAG</p>                                                                                                                                                                                                                                                                                                                                                                                                                                                                                                                                                                                                                                                                                                                                                                                                                                                                                               |
| CrLEA6-2 | <p>ATGGAGAATCAAACCTGAGAAAAAGGAGAGTGAAATCAGGTAAAGAAGGACTTCCGATGAAGGATAGTCC<br/>TTACCTGCAATACAAAGGATGTGGAGGACTATAAGCGTCAAGGTTATGGCACCCATGGTCAACAAGAACCAA<br/>ACCCAAATCAAGGAGCTGGTGCCACTGAGGCACCCACTCTCTCTGGTGCTGCTGTTTCTCTGAATCTGAA<br/>TTCAAAGCCACTGATGCCATTAATCGCAAGGGAGTCCCTTAATTAACAATATCTACCGTTCCCTTTATGTAA<br/>TAACAAATACTTTTTCTTATCTTGTGTTTCTTTAGTTGTTGTTGTTAGATCATATGTTTAAATTTGCA<br/>TTTTAGTATTACCCCAAAAAAATAGAATAACATTTGCATTTAGTATGTTGTTATTTGCTTATAACACGTTGC<br/>GGATGTTGTAGAACTTTGCTATGTAAGAATTGAACGAGCAATTATCAATCTTTTCTTTTTTCCCTTCTCTC<br/>TCACTCTTAAGGAAATACTATTTATCGTTAGCAGTGGAAGAAAATATCACTTTCTCTATTGATTTTTT<br/>CGCTCTGCTGTTGTTTTTACAATTTGGGAAGCTATTTTGAATTTTTTCTTTGATGAAGGATGCTAAG</p>                                                                                                                                                                                                                                                                                                                                                                                                                                                                                                                                                                                                                                                                                                                                                                                                                                                                                               |

TAAC TAATAAACTTCCATAGTTGTAAGTTTTAAACATGTTAACAATGGTATAAAATTTAACTGTATGTGTG  
GAAGAGATTTTGTGGTAAAGATAAAGTTTATTTTTATGATGTTTACTATTAATTTATTTGTTGGAGGATAT  
TTTAGTATATACATAGAAAGAAAAGAAATGCAAAGTAATTAATAAATAAATAGCTAATTTGAATGACATA  
TTAAATAATAGTTTATATTAATTCATAAAAAATAAAAATTTGTATGAGATTTTTTAATATATATAATAA  
TTATTACATAGGATAGAATTAGTTAAATATTTTTCAGTAAAGTCATCTAAGATAAGTTAGTAAGAGAGGT  
TAAAAATAAAAGTTTGTGAAGTTAGTAAATTTTAAATATATATGCAGATGTAACAAGAAAAATCAATGTGCG  
GTAACCGATTAGACTTTTCATTTTGTGAATGGATTTCGAGGAAATTGCTAAATTTATATAGATATCATATA  
CTAAAGGGTAATAGAGTATGATAGACTTTCTAACGTGCCATATAAGACATAGTTGGAGAAATACAATTTGGTC  
TAGAGAATGATACGAAGTTTTTGAAGTCATGTTTTGTTCACTGCAATAAAGGCTACAGAGTAGTAGCCATT  
TATTTGATGGAACCTTCGGAAGAGAACATTGGCTAAACAGAAATTTCTGATAAAAAATACAACTAAAC  
AGAAATGCAATTAATATTGTAGTATTAACATAAATTCATTTGATATGCATATAAAATTTTCATTTACTAT  
GCATATAAAATTTCTTATTACTTAAGCACATAGCACCATCCAAAAATATATTGTGAAAAAAATTTATTATA  
TTTTTGGAAAAATTATCTAATATTAACATAAAGAATGTTCCCTATAACCTTAAACTTCAAACTTCTGTAT  
TACATAAAGGGAATAAGAACATATACATAAATATATTCCCTTAAAAAAATATTAATATGTTTCTATTGCA  
GCAAAATTAGTTCCGTAAATAAACAAAGAAAAGAAAAAATTTATCTTACGATAAGAGAACATTCA  
AACATTTTTTACGGTGAGGTTTTTGTAGATGAAAAAGACTACAATACGGAAGAAAAATTAATGAGATAC  
GAGAAGTAGAGGAGTAAAAATGGCACAGATTTAATAACACTAGGGGCAGCTATGACATAAAATTTGAGAAG  
AAAAGGAACAAAAATGAATAAATGAGAGAAATGAGTATTTTCAGTTTGTCTTCTTAGTATTCAAAAACC  
AATTAATTCACAAGGGAACACAAATAAAAAAGTCCATAAAATTAAGTTTATTAGATCGAATACGGTTA  
CTAATAAAAAATATTATTATAAATAAATAAATAAATTAGTGACCAAAATTAACATTTCATTTCTTTTT  
TAATTTTACGATCAAAATTTGATTTTTAATTTAGCAGCAAGTAACCTTAATAAATTTTTTATTTTAAAT  
GACATCAGTCATTAAATTTGATTTTTATTGACAATTAATTTATATAAATTATCAAAATTTGATTTCTAATTAT  
ATATATATATATATATAGTAAATTTACTGTCGATATTTTTAATAAAAAATTTACGATATTAATTTTCT  
ATGAAAAACAAAATACAACTTCGTTAGAGATATTATGTGCATTTACATTAATAAATTAAGGATGCAAGTAA  
TGATTTTTTAATACTTAATATTTAAATTAACATCTAAATTTAATAATTTTATTTTATTTTCTATTTTT  
TTCTTTCTATAATATTTTATCTATTTTATAGATGTCTTGTAATAAATTTTTTAAATAAATAAAAAATACAT  
TCATTTCTACATTCGTTATACGGTAAATAAATCAAAAGATACATCTTATTCGATAAGTAATGATTTAAAGA  
TTAAATAAATCTAAAAAATTTGGTTATTGTGATTAATAAATAAGAAAAATTTTAACTTCAAAATCATAGAA  
GAAATGGGAAAAAATGTCAACAAATGAAGTAAAGAGACATATGATAAACTATTGGAACGGTCATGC  
ATTTATTCGGTATTTTTATTTATTTATAAATTTTGATAAATTTGTTTTATTATATTCAAAGTTATTTTTA  
AATAAAACAAAATATAATTTATAGTTAATTTAAAAATATTAATATCATTTAATACATTATGTATTATATTA  
ATTTATATTTTATATAAATAAATAAATATGAAATATTATATATCTTTAAAAATAAATAAATTTATTTAT  
TTGTTGGTTAAAAATTTGTAATTTAATATATTTTTAAAAATAATTTAATAAATAAGATATTTATATAAAGAT  
TAATATATTAATAAATTACAAAATGAAGAATAATCGAAATATGTAATAATGTCATTTTACTATTTTATAAA  
AATTCATTTGATATAAAGATAAATATTAATAAATATCATAAAAATTTAATAAATGTTTCGTATAAAGTTAT  
ATAATTGAAAAGAAAAGTATATAAATGTTATTTTTATATAAATTTATGAGAAATTTGTAAGGTAAAAAAT  
AAAGAAATATTAATATATTTTTTAATAAATTTAAGAATATTAATATAATAAACTTGGTGAAGATATGTCA  
TGCTAATTTGTATCACCAAAATAGAGCAAGATCTTTCTATTTTTAAATTTTGTGTTAAAAAATAAATAAG  
TATCATTTTTTAAATATTTTATTTATTTTCTTGTTCCTTTTAACTTCCCTTTAAGAGATTA  
ATTTAGAGCGGAAAATTTGATTTTTTAAAGAAAAAATGAAACGTAATTTGGTTTTCCTTTGCAATTAAGT  
TATACTAGTATGGGATAATACGGTAGAGTTACATTATGAAAGATACACAATCAAAGTAAAAATACAACTAA  
TTGATAAATTCAAATTTATTTTCATCTAATCAAACTTCAGATATTTTGTAGATATGTTTATATATATTTAATGT  
GATGAATATCTAACTTTGTATGTATTTATTTTGTGTAATAAATTTTAAAAATATAAAAAATTTGCTAATCAGT  
TGTTGTATTTATTTCTATTTTACAAAATTTTTTGTATAAATTTTATTTATTTATTTAATAT  
ATTTTTTATTTGATAGTTTTAAACCTATAAAAAACAAGCAAAAAATATTTGACATTAATAAATTAATTTAATAT  
ATTTTATCAAGTTTTAAATATTTGACATTCATTTAATAAAATTTGACTAATATAAATATTTGAACAACGTTATG  
ATTGAGAGACATGATATTTGGCTTCAATGTTTAAACAATAAGAAAAGGATGACGACGCTCTACAACAAAATTTG  
ATGGAAAAGGGAAAGTACACACTGCTTCTCAGTTTAAATCTCTTATGATTTGGGATTTCCAGCTTCAAGAA  
CAGAATCTTGCTTTGGTGAGAGTGTATGCGCATATCGAGTGATGCCTTCTGAATACAACGAAGGATGAGCA  
ATGATGATAAATGATATAATAAAAAATTTATTTATAAAAAATTTGTTATGCATTTGTTATATTTTGTAGATTT  
ATTTGATGATGATAAATATAAAATAAATGTTGATCTTATTAATAAATAAATACTGATGTTAAATTTATTAT  
TAATTTAGATATGTTATCTCTTAATTTAATAATCAAAATCATCTTTCTATATAAATTAATTTAATTTAAT  
TTATATTTAAAAACAATTAGGTAGTAGCTTTGGTTTTAGAAATAGTTTTCTATTTTTTATCTTTAATATTTTA  
TATAAAAAATAGTAAAAATAAAGATATTTATTTTTATTTTATTTTATTTTATTTTATTTTATTTTATTTT  
TAAACTTTTAAACTAAAAACATAATAAAAAATAATGTAATATTTTTGTAATAAAAAACAGAAAATATTTTT  
TAAATCAAAAGTTACCTTTAGTAACTTTATTTTAGTTTCAATTTTATAAATTTTGTGTTCTTTAATTT  
TATATATTTGTTACTTTATTTTTTTATCAAAAAATATTAATAATCATATTTATTTCAATTAATTTTGGTAA  
AAATATTATAAATAAATAAGATTTTTATTTAGTTCTAAATTAATAAATAAATAAATAAAGTGACAAAT  
TATTCTGATACCATAGATTATCATCCAGGCTTTGCAGTCATCTAGTTTAAATTTAGCTTTTATTTATTTTAT  
TTTTGAGCCAGTTTATTTTAGCTTTTGTCAATTTTCAATTGGGAATTCGCTAAATTTGAACCTTTGCTCATGT  
GCTTTTGTGAGAAATTTGGCCAATATATAATCTTTTACCTTAAGAAATTAGAATTAATATTAGGATTAAAGAT  
TAATTTATTTTAAAAAATTATATTAAAAATAATTTATTTAATATTTTTTATAGATATTAAATTTGCACTAA  
TTTAGCTCTTGAATTAATTTTTATTATATTATTAATTCATAAAAAATTAATAAATTAATATTATTTTAA  
TACTTTAATTTAATAGATAATATATCTTTTAAAAATATAAGTAAATGTTAATTTATAAGATTATATACCAGTA  
AGTTTTTAATTTTTATAAAAAATTAATATGTATAATCATCATATTAATATTATATTATTTTTAAATTTGTA  
TAATTTACATAAAAAAAGTTACTCAATGAAATCATTTTTACAAGAATTAGTTCGTAATAAGTAAATCCAC  
ATCCTTAAATTTTAGAAGTATTTATATAAGACATGTTTTTATACTTAAATTTTAAAGTATATTTTTTTTT  
ATGGTGGGATAAATTTAAAAAATAAAGTGAATAAAAAAAGGTTGAAAGATAGGCTTTTATTTT  
TTACCTTCGAAGCCAACTGGGCTTGAGCCGAACACAATCACAGACTGGGCTCTAACCTTAAGTCCAAAGGAA  
TTAGGTTTGTATGAAAAGAAAAAAGGAGGAAAGATTCCTATCCTTACGTTAAATGTTATTGACCAGAAA  
AGGTAATAAAGGAAAGACTCGCTTTACAAATAAGATAAATTTAAGATAAATAATGCCTTGTATATGAGG  
ATGTTAGGATATCCAGTAATGTCCCAATCTACAAATACAATGTACGAACATACAAATTAATCTTCACT  
TATAGCAATTTCAAACATATAATAATTTTTTTAATCAAAACATGAGGATAGAAAAAGGATTGTTACTACCT  
CATGAATGAATCCTTCATTGAGGATGGTGATCAACACACTTTATATATCTTTTAAATTCATTGCTTACTA  
ATAAGACGAAAATTTATCTAATAATAAAGAAATGTTAAAAAATAATGTACGAGATAATACAGTACATCCCCAT  
GTAATTCAAATTTCAAATATATACCAGAATTCACAGGTGTCCCCACCCGCCTTTGGCGTAACATTTGACA

[illegible]

|        |                                                                                                                                                                                                                                                                                                                                                                                                                                                                                                                                                                                                                                                                                                                                                                                                                                                                                                                                                                                                                                                                                                                                                                                                                                                                                                                                                                                                                                                                                                                                                                                                                                                                                                                                                                                                                                                                                                                                                                                                                                                                                                                                                                                                                                                                                                                                                                                                                                                                                         |
|--------|-----------------------------------------------------------------------------------------------------------------------------------------------------------------------------------------------------------------------------------------------------------------------------------------------------------------------------------------------------------------------------------------------------------------------------------------------------------------------------------------------------------------------------------------------------------------------------------------------------------------------------------------------------------------------------------------------------------------------------------------------------------------------------------------------------------------------------------------------------------------------------------------------------------------------------------------------------------------------------------------------------------------------------------------------------------------------------------------------------------------------------------------------------------------------------------------------------------------------------------------------------------------------------------------------------------------------------------------------------------------------------------------------------------------------------------------------------------------------------------------------------------------------------------------------------------------------------------------------------------------------------------------------------------------------------------------------------------------------------------------------------------------------------------------------------------------------------------------------------------------------------------------------------------------------------------------------------------------------------------------------------------------------------------------------------------------------------------------------------------------------------------------------------------------------------------------------------------------------------------------------------------------------------------------------------------------------------------------------------------------------------------------------------------------------------------------------------------------------------------------|
| CrDHN5 | AAGAAGAAGAAGAAAAAGGAAAGAAAGGGCTGAAGGAAAAGATAGGAGGTGATGATCACAAAGGAACA<br>GGCACTGCTGTTCCAGTTGAGAAAGTGGAGGTTGATTCAGAGCACCCCTGACACTGAGGAAAGAAAGGGTT<br>TCCTTGACAAGATTAAGGAGAAGCTGCCAGGTGAGCACAAGAAGGAGAGGAGTTCCTCCGACATCATCG<br>GAATATGTTGCTGCACACACTGCTGAGACTCATGAAGGGGAGGCTAAGGACAAGGAGAAGAGGGCCTTTT<br>AGATAAGATCAAGGAGAAGCTTCCGGGTATCACTCCAAGCCAAATGAAGACAAAGAAAAGGAGACCGATA<br>CTCATTGA                                                                                                                                                                                                                                                                                                                                                                                                                                                                                                                                                                                                                                                                                                                                                                                                                                                                                                                                                                                                                                                                                                                                                                                                                                                                                                                                                                                                                                                                                                                                                                                                                                                                                                                                                                                                                                                                                                                                                                                                                                                                                                |
|        | ATGGCAAGTTATCAGAGTCAATACGGTGATCAAGGTCGTAAGACCGATCAGTATGGAACCCCTGTGACTCA<br>AACTGACCAATACGGTAACCCCTGTGAGACAAACCCGTGAAACCCGTAAAGCAATATGGAACCCCGTTACG<br>GAGCTAACACTGCGGACACTGGCTCGGGTCATAGAAGTGAACCACTGGTGGCTATGGAACCTCGCACTGAG<br>GGTGTAGGCGCGGGTTATGGAACCACTGGTGGCACCACCCTGGTTATGGTGCCACTGATTATGGAACAC<br>CGGTGGCACCCTACTGTTTATGGTGGCACTGATTATGGCACCACCGGTGGCACCCTGGTACCGGTTATG<br>GAAGTGGAAACAGGAACCTACCGTGGCACTGGTTATGGAAGTGGAAACCCGGTTATGGAATCAACCTGGAGGT<br>GCACATACTGATGCAGGGTATGGGAGGAGCATCGTCATGGACATGACCAGTCTCATGGTGGGTATGATGC<br>ATCGGGGAGCAACATCATGAGAAGAAAGGGATAATGGATAAGATCAAGGAGAAGCTTCCTGGAACCTGGAG<br>GACACAACGAGAAGTAG                                                                                                                                                                                                                                                                                                                                                                                                                                                                                                                                                                                                                                                                                                                                                                                                                                                                                                                                                                                                                                                                                                                                                                                                                                                                                                                                                                                                                                                                                                                                                                                                                                                                                                                                                                                                                                                  |
|        | ATGCAATCTGCCGCGCGCTCAACACCGACGCTGGCATCGTTGGCCGGCAAGACATATCGGACGTGGCTAG<br>AGAGCAAGGCGTGAGCGTATCCCAAACAAAAGTGGGTGTGAACCGTGTGATCACAGAGTCGGTGGGAGGGC<br>AGGTGGTGGGGCAATTCGTGGAACCTGATGTCCTTATGAATTCCTTGGTATGGCTCTCGAACCAAGATGCC<br>ATAACCATTTGAGAGGCACTGGAAGCGTCGGCGGTGGCTGGAGCGGGTGATAAGCCTGTGGACCAAAAGCGA<br>CGCCGCTGCTATACAAAGCTGCTGAAGTGAAGCCACCGGAAAGAAATGAGACAGAGATGGCGTTGGGTG<br>CGAGGGCCCAATCAGCTGCCACTCACAACACTCGCACTCCCTCTTACTTTTATAAAACCACTTTGTCTCAT<br>GTCTTGGCGGTAACCTAATCCTAACAACCTCATACAAACCTCCTAATAATTATATTAATTAGTTGAGTAA<br>TTTCCATGTGAATGCAGGATGCTAAGGAGAAGTTGCCAACGGACAAGCATGTAACCGGTGAGGATGCAGAG<br>GGTGTCAATGCTGCCGAGCTTGAACCAACCCGACATGAAAACCAACCCCTGCCGGGGTTGCTGCATCCGT<br>AGCCGCTGCCGCCGCCATTAATCAAACCGGTACCTTACAATAATATTATAA                                                                                                                                                                                                                                                                                                                                                                                                                                                                                                                                                                                                                                                                                                                                                                                                                                                                                                                                                                                                                                                                                                                                                                                                                                                                                                                                                                                                                                                                                                                                                                                                                                                                                                                                      |
|        | ATGAGTCAAGAGCAGCCTCGGAGAGAGGAAGCCATCAAATATGGAGATGTGTTCAATGTGGAAGAGAGCT<br>TGGAAGCAAAGCAGTGGCACCCGTCGACGCGAGCGATGATGCAGAAAGCAGAGACTGCTATGATTGGGAAGA<br>CCGAAAAGGGTGGTGTGCTGCTGCAACCATGCAAGCTGCCGCATTGAAAAATGAGAGAGATGGCGTTTGTGGA<br>CATAATGATATCACTGAAGTTGTTGCACAGAGTGGTGTGCTAGTGAATCTGATCTTCCAGGGAGGCA<br>AGTTATTTTCGGAGTCAGTTGGAGGACAGGTTCTTTATAAAACCTATCTCTTTTCTATTCTTTATTATTATG<br>TATAGGTAATAATATATATTTTAAAAATTTAAAAATTTTAAATTTCTAAAAATAACAGGTTTTGATTGCTTA<br>TTTTTTTTTACATAAATCAATATTTTATAAATGTTTATCATTTTAAATGATAAAATGTAAAAATGATTAT<br>TTTTAAAAATTTGTTGTTTTAAAAATGGAAGATTAGAATTAATAATTAATAATTTTAAAAATTTAGGGTTAAAA<br>ACATATGCTATCTTTTATGGAGTGGCTGTTATTTTAAATCTTGTGTTGTTAATTGGTTTCGTAGGTTGTT<br>CACACACTAGAGGAAAAGGAAAGGAACATTTGTAAATTAGTTGAGGTATTAATCTTTCAAGATAATATCA<br>TATACTGTACTAACAATTAATAAAGTGTGTTTTTATATATGAAAGAAAACAGAGTTTAATTAAGTTGATT<br>CGTTTTAAAAAAGTGTGAAAAGCAATTAATAAGCGTGTGTTTGTATTAACTGTTAGGCACTGTATGGTGG<br>ATGAACACCATGAATCAAAGAAAGATGTTATAATATATTTACCAATTTGATCCTCTCTCTTTTACATGTACA<br>TTACCCAACATAATTAATATAATAATGATACCAATTACGAACAGGTGGTGGAGCAATTTGGGCAAAAGGTTG<br>CATCTGAATACGACGATGCCATCTTCTTGTGCTCAAGACTTGGGCTCAAGAGTTGGTGGTGGGATCACCATA<br>GGTGAAGCATTTGGAGGCGACGGTTTTGACGGCGGGAAGAAAGGCGGTGGAATGGAGCGATGCGGCGGCGAT<br>TCAAGCAGCGGAAGTGAGAGCCACCGGACGTACCAACATTTGTTCCCGGAGGTGTTGCTGCGGCGGCACAAT<br>CAGCAGCCACCCCTGAATGCTCGAATACAAAGGACGAGGACAAGACCAAACTCGCAGATGTTTTGTCCGTA<br>CGCAAACTGAACCTCACTCGAACCCTGTTTTGTTGCTGCCATGCAATGTGAGACATGCAAGGATCAAGGAT<br>CATGGAGTTCACCTTTAGAATAATTTTAAATTTTCTTTTTTATAAAATTTTAAATTTTAAATAAAAAATATT<br>AATTAGTTTTATATTTTAAAAATAATAATACATTTTATTTAATACTTATTTTATAAATAAAGAAATATAG<br>GATGATATCAAAAGAATAAGTCGGTTTTAGATAAATATATATTTAATTAAGTATTTTAAATATAATTTT<br>TTCCTAAATGACAAATTTATTAATAATTTGAAGAAGAGGTTATTTGATAAATTTTTCATGAAATTTATAA<br>CATAGCTTAAAGTAAGTTTTTGGACCTGTCTTAATGAGCAAACTTCAAGTGAGATTTTGAAATGGTAAGA<br>ATAAAATATCTAGTCATTAAATTTTAAAGATTTTACTTTATTAGTTTTTGACTTTGTATAAAATCATT<br>TATTTTATTTTTTAACTTAATTTTGTAAAGAAAACTAAAATGACTTTTTTAAAAATAGAATAACGAA<br>GTTTTTTTTAAAAATAAAACCGAAGAAATTTTAAATTTCTTATCTAAAAATTTGTATCTATAAATA<br>GAGACAACCCACTCTCAAGCTTAGGGGGCAATTGCTTCTCCCAAAATATTTTTTGTATTATTTGTATGT<br>ATATGAATTTATATACACAGCTGTTGCATGATCGTACTGTTACGACCTTTTAGATCCATCAGTGATTTTAA<br>GGATTAATATAAGTTCTTTTTTAAAAATAATATTACAATTTATTTATATTTGCGAGATGCGACTTCGA<br>AATTACCATCAGACAGACCAGCGACGAGGCGGAGATGCTGAAGGGGTAACGGGTGCAGAAATGAGAAATGAT<br>CCTAACCTCACTACTCATCCAGGGGGCGTGTCCGCATCCGTCGCTGCTGCTAGGCTTAACCAAAACCAA<br>TAATAACTAA |
|        | ATGAGTCAAGAGCAGCCAAGGCACCCCCAACCCGCCCAAGATCCCATCAAATACGGTGACGTTTTTCGATGT<br>CTCGGCGACCTCGCAAAGAAGCCCGTTGCACCCGAAGACGCCCGCATGATGCAGAGCGCCGAGACCCGTG<br>TCCTCGGCCAGACCAAGCCGGGGGAGCAGCTTCCGCCATGCAATCCGCCGCCACTCGGAACGAGCAGGCC<br>GGCGTTGTCGGTCACCGAGATGTCATGATGTCACCGCGACCGTGGTGTACCGTCTCGGAGACTCAAGT<br>TCCCGGAAGACGCATAATTACGGAATCAGTCGGTGGACAGGTTCCGGTTTTTCAGTGTGTAATGTGTTGCT<br>TTTTAGGAATTTGAGTTTGATTATCATCTTTTATCTTTGCCAAAACCCATAAAGAATAATTTTAAATCCT<br>TTTTATTTTCTACAACTTTTATTTTTTCAAATAAATAATTTTAAATAATTCGTATCGTATTTTGAATAA<br>TAAATATATATTTTTATAAGCTACTTACCAGAAGAATTGATAGTAAGATGTATCAGAGTTTTGACAAGAAAT<br>GGGATATACTGCCCGTAATCTCTTTAAGAGTTGAAATTTATTTTCATCAATTAATAAGCAATATATTCAAAA<br>TAGTAAAAATAAATAAATAACATATATTAAAAAGTTTACAAAAATTAATTTTAAACAATTTTAAATTTCA<br>TTAATATTTTGTGAACTTTATTTTTTGCGAATTTACATTTTAAACACGTAACGAGGATTTGTTTATTTT<br>TTTTATTTTATATTTTGAAGGTTGTGGGACAGTATGTTGAGCCGACTCCGGTTTCAGGCGGGACGAGCCGGT<br>CGGTCCGAGACAGTGCATTAACCATAGGGGAGGCGCTGGAGGCGACGCGCGAGACGCGGGGTGAGAAGCCG<br>GTGGATAAGAGTGACGCGTGCAGGATACAGGCGGCGGAGGTGAGAGCGACGCGGAGTATGTTTATAACGCC<br>GGGAGGGCTTGCTTCTATGGCTCAATCGGCGGCGGCTTCAATGCTGAATGCAACCGTACCCAGGAGAAGG<br>TCAAGCTCGCCGATGTATTGACGGGGGCCACCGCAAGTTGCCGGCGGACAAGGCGGCGACAATTTGAAGAT<br>GCTGAAGGAGTGGCGTGTGCTGAGGTGAGGAACAACCCAGATGCGACGGCCACTCTCGTGGCGTGGCAGC<br>CTCTGTGGCTGCAGCTGCTAGGCTCAATGAAAATGTTAATGTGTGA                                                                                                                                                                                                                                                                                                                                                                                                                                                                                                                                                                                                                                                                                                                                                                                                                                                                                                                                                                                                                                                                                                                        |
|        |                                                                                                                                                                                                                                                                                                                                                                                                                                                                                                                                                                                                                                                                                                                                                                                                                                                                                                                                                                                                                                                                                                                                                                                                                                                                                                                                                                                                                                                                                                                                                                                                                                                                                                                                                                                                                                                                                                                                                                                                                                                                                                                                                                                                                                                                                                                                                                                                                                                                                         |
|        |                                                                                                                                                                                                                                                                                                                                                                                                                                                                                                                                                                                                                                                                                                                                                                                                                                                                                                                                                                                                                                                                                                                                                                                                                                                                                                                                                                                                                                                                                                                                                                                                                                                                                                                                                                                                                                                                                                                                                                                                                                                                                                                                                                                                                                                                                                                                                                                                                                                                                         |
|        |                                                                                                                                                                                                                                                                                                                                                                                                                                                                                                                                                                                                                                                                                                                                                                                                                                                                                                                                                                                                                                                                                                                                                                                                                                                                                                                                                                                                                                                                                                                                                                                                                                                                                                                                                                                                                                                                                                                                                                                                                                                                                                                                                                                                                                                                                                                                                                                                                                                                                         |
|        |                                                                                                                                                                                                                                                                                                                                                                                                                                                                                                                                                                                                                                                                                                                                                                                                                                                                                                                                                                                                                                                                                                                                                                                                                                                                                                                                                                                                                                                                                                                                                                                                                                                                                                                                                                                                                                                                                                                                                                                                                                                                                                                                                                                                                                                                                                                                                                                                                                                                                         |
|        |                                                                                                                                                                                                                                                                                                                                                                                                                                                                                                                                                                                                                                                                                                                                                                                                                                                                                                                                                                                                                                                                                                                                                                                                                                                                                                                                                                                                                                                                                                                                                                                                                                                                                                                                                                                                                                                                                                                                                                                                                                                                                                                                                                                                                                                                                                                                                                                                                                                                                         |
|        |                                                                                                                                                                                                                                                                                                                                                                                                                                                                                                                                                                                                                                                                                                                                                                                                                                                                                                                                                                                                                                                                                                                                                                                                                                                                                                                                                                                                                                                                                                                                                                                                                                                                                                                                                                                                                                                                                                                                                                                                                                                                                                                                                                                                                                                                                                                                                                                                                                                                                         |
|        |                                                                                                                                                                                                                                                                                                                                                                                                                                                                                                                                                                                                                                                                                                                                                                                                                                                                                                                                                                                                                                                                                                                                                                                                                                                                                                                                                                                                                                                                                                                                                                                                                                                                                                                                                                                                                                                                                                                                                                                                                                                                                                                                                                                                                                                                                                                                                                                                                                                                                         |
| CrSMP1 |                                                                                                                                                                                                                                                                                                                                                                                                                                                                                                                                                                                                                                                                                                                                                                                                                                                                                                                                                                                                                                                                                                                                                                                                                                                                                                                                                                                                                                                                                                                                                                                                                                                                                                                                                                                                                                                                                                                                                                                                                                                                                                                                                                                                                                                                                                                                                                                                                                                                                         |
| CrSMP2 |                                                                                                                                                                                                                                                                                                                                                                                                                                                                                                                                                                                                                                                                                                                                                                                                                                                                                                                                                                                                                                                                                                                                                                                                                                                                                                                                                                                                                                                                                                                                                                                                                                                                                                                                                                                                                                                                                                                                                                                                                                                                                                                                                                                                                                                                                                                                                                                                                                                                                         |
|        |                                                                                                                                                                                                                                                                                                                                                                                                                                                                                                                                                                                                                                                                                                                                                                                                                                                                                                                                                                                                                                                                                                                                                                                                                                                                                                                                                                                                                                                                                                                                                                                                                                                                                                                                                                                                                                                                                                                                                                                                                                                                                                                                                                                                                                                                                                                                                                                                                                                                                         |
|        |                                                                                                                                                                                                                                                                                                                                                                                                                                                                                                                                                                                                                                                                                                                                                                                                                                                                                                                                                                                                                                                                                                                                                                                                                                                                                                                                                                                                                                                                                                                                                                                                                                                                                                                                                                                                                                                                                                                                                                                                                                                                                                                                                                                                                                                                                                                                                                                                                                                                                         |
|        |                                                                                                                                                                                                                                                                                                                                                                                                                                                                                                                                                                                                                                                                                                                                                                                                                                                                                                                                                                                                                                                                                                                                                                                                                                                                                                                                                                                                                                                                                                                                                                                                                                                                                                                                                                                                                                                                                                                                                                                                                                                                                                                                                                                                                                                                                                                                                                                                                                                                                         |
|        |                                                                                                                                                                                                                                                                                                                                                                                                                                                                                                                                                                                                                                                                                                                                                                                                                                                                                                                                                                                                                                                                                                                                                                                                                                                                                                                                                                                                                                                                                                                                                                                                                                                                                                                                                                                                                                                                                                                                                                                                                                                                                                                                                                                                                                                                                                                                                                                                                                                                                         |
|        |                                                                                                                                                                                                                                                                                                                                                                                                                                                                                                                                                                                                                                                                                                                                                                                                                                                                                                                                                                                                                                                                                                                                                                                                                                                                                                                                                                                                                                                                                                                                                                                                                                                                                                                                                                                                                                                                                                                                                                                                                                                                                                                                                                                                                                                                                                                                                                                                                                                                                         |
|        |                                                                                                                                                                                                                                                                                                                                                                                                                                                                                                                                                                                                                                                                                                                                                                                                                                                                                                                                                                                                                                                                                                                                                                                                                                                                                                                                                                                                                                                                                                                                                                                                                                                                                                                                                                                                                                                                                                                                                                                                                                                                                                                                                                                                                                                                                                                                                                                                                                                                                         |
|        |                                                                                                                                                                                                                                                                                                                                                                                                                                                                                                                                                                                                                                                                                                                                                                                                                                                                                                                                                                                                                                                                                                                                                                                                                                                                                                                                                                                                                                                                                                                                                                                                                                                                                                                                                                                                                                                                                                                                                                                                                                                                                                                                                                                                                                                                                                                                                                                                                                                                                         |
|        |                                                                                                                                                                                                                                                                                                                                                                                                                                                                                                                                                                                                                                                                                                                                                                                                                                                                                                                                                                                                                                                                                                                                                                                                                                                                                                                                                                                                                                                                                                                                                                                                                                                                                                                                                                                                                                                                                                                                                                                                                                                                                                                                                                                                                                                                                                                                                                                                                                                                                         |
|        |                                                                                                                                                                                                                                                                                                                                                                                                                                                                                                                                                                                                                                                                                                                                                                                                                                                                                                                                                                                                                                                                                                                                                                                                                                                                                                                                                                                                                                                                                                                                                                                                                                                                                                                                                                                                                                                                                                                                                                                                                                                                                                                                                                                                                                                                                                                                                                                                                                                                                         |
| CrSMP3 |                                                                                                                                                                                                                                                                                                                                                                                                                                                                                                                                                                                                                                                                                                                                                                                                                                                                                                                                                                                                                                                                                                                                                                                                                                                                                                                                                                                                                                                                                                                                                                                                                                                                                                                                                                                                                                                                                                                                                                                                                                                                                                                                                                                                                                                                                                                                                                                                                                                                                         |
|        |                                                                                                                                                                                                                                                                                                                                                                                                                                                                                                                                                                                                                                                                                                                                                                                                                                                                                                                                                                                                                                                                                                                                                                                                                                                                                                                                                                                                                                                                                                                                                                                                                                                                                                                                                                                                                                                                                                                                                                                                                                                                                                                                                                                                                                                                                                                                                                                                                                                                                         |

|        |                                                                                                                                                                                                                                                                                                                                                                                                                                                                                                                                                                                                                                                                                                                                                                                                                                                                                                                                                                                                                                                                                                                                                                                                                                                                                                                                                                                                                                                                                                                                                                                                                                                                                                                                                                                                                                                                                                                                                                                                                                                                                                                                                                                                                                                                                                                                                                                                                                                                                                                                                                                                                                                                                                                                                                                                                                                                                                                                                                                                                                                                                                                                                                                                                                                                                                                                                                                                                                                                                                                                                       |
|--------|-------------------------------------------------------------------------------------------------------------------------------------------------------------------------------------------------------------------------------------------------------------------------------------------------------------------------------------------------------------------------------------------------------------------------------------------------------------------------------------------------------------------------------------------------------------------------------------------------------------------------------------------------------------------------------------------------------------------------------------------------------------------------------------------------------------------------------------------------------------------------------------------------------------------------------------------------------------------------------------------------------------------------------------------------------------------------------------------------------------------------------------------------------------------------------------------------------------------------------------------------------------------------------------------------------------------------------------------------------------------------------------------------------------------------------------------------------------------------------------------------------------------------------------------------------------------------------------------------------------------------------------------------------------------------------------------------------------------------------------------------------------------------------------------------------------------------------------------------------------------------------------------------------------------------------------------------------------------------------------------------------------------------------------------------------------------------------------------------------------------------------------------------------------------------------------------------------------------------------------------------------------------------------------------------------------------------------------------------------------------------------------------------------------------------------------------------------------------------------------------------------------------------------------------------------------------------------------------------------------------------------------------------------------------------------------------------------------------------------------------------------------------------------------------------------------------------------------------------------------------------------------------------------------------------------------------------------------------------------------------------------------------------------------------------------------------------------------------------------------------------------------------------------------------------------------------------------------------------------------------------------------------------------------------------------------------------------------------------------------------------------------------------------------------------------------------------------------------------------------------------------------------------------------------------------|
| CrSMP4 | ATGTTTCAACAACCACTATTTTGGAAAGTTCCTCACAATCTCTTTTCGATCAGAAACAATGAGTCATGGCCAGCC<br>CAAGAGACCCCAAGCAGAGGATTCTTTTCTACTGTGAACCCATCAAAATACGGCGACGTTTTCAAAGTTACCG<br>GCGAGTTGGCGTCCAAGCCGATTTCCACACAGGAAGCCGCCCATGAAAGCCGCGAGATTAGGGCGCTCTTA<br>GGGCAGCCGCAGAAAGGAAGCCCGTAGTTCATGCAGGCAGCTGCGGCAATCAACAGGCGTGGCGTGC<br>CGTTGACGGCAACGGGGTCGCCATCAAGAAGGAAGACGTTAGTGTAAGTAAACAACAACCGCTGGCAACC<br>GTATCATAACAGAATCTGTGGGTGGCCAGGTCCTCGGGAAGCGTGTGGACACTCACGCGCCTGTGGTCCCC<br>ACGGATTTGGGTTCTGCAGTTATAGATGGCGACCCGATAACTATTGGAGAAGCTCTGGAAGCAGTGGCCAT<br>AGCGGTTGGGGATAAACCCGTTGAACCAAAACGACGCGCTGCGATCAGTGCCGCGGAGATTAGGGCGACCG<br>GCGAGAAGAACGTAAGGGCCGTTGAGTGGGGCATCGGCACAATCGGCAGCCACTCTCAACAGCCACGTC<br>ATGCGAGTCCAAGATATGACAAAACCTTTCTGATATATTAACGGTAACAATACTCTTCGACCCAGTCTTCAA<br>TCTAATATTTGACACGGAAGTTACGGAATAAAAAAAAAAACAGTGATTTACGGAAGAAAAATTGAAATT<br>TAAATAAAAACTTAGAAGAAAAAGAAATTTTGAATTTAAATAAAAAAGAGAAGGAAATGAAATTTTTTAA<br>TTTGAATATTAATGCTAATCTTTTGAAGAGAAGGAAATATTTAACTTTTTTTTTTATTTTCTTCCCTTA<br>AAATCTCTGGTATTGTAATATTAATTTCAATTTTTTATTTTATAAAAAATTAATTTAATCTTTTACTTTAT<br>AAAAAGTTTTATTTTCAATCATTTTGTATATTTTGTGTTAACATTTTATAAAATTTTCCAATAAATAT<br>TTGTCGATTATTTATGGTAATTTCTTTTATCTATTGTTATTTATTTTCAATAATTTTATTAATTTT<br>TTATTAGTTTAAAAAATTTTAAACATAAATATAAAGTTAATTAATAAATAAATATAATAGAGATTCTAATA<br>AAAAATTTTATAAAGTTAAAAATAAAGTGAATAGTATGAATTACACCTAAATTAGTTAACATCAGTCAAAAC<br>TTATAAAATCTTGCTCTAATTACGACGGCGGTAATTAGAAATATTGGCTCTAAAGTAAGAAATTTCTTTTT<br>TTTTTTTCTATAAACTTTGGAATTTCCAAAGTTGTGCTGGATCTCGGATCATTTTGAATTTTGAAGAAA<br>GCTGGTAGTGTCTATTTTTTCTCTTTACAAGATTTAAATTCGAAATTTATGAAATAAGGTCCATATTATCA<br>TTAATCAGCCAGCGGCAGGTACGTTTGGCTAGAAATTAATTAATGTGTAACACTTTACATACACTTTATAT<br>CAGTTTGATTTTAAATATAAAGTCACAAGATTATTAGTGAGATTTGAATGAAATTAATTTATTAATAAAG<br>TCATAAAACCTTTGTATTTTGTGATATGATAAAAAATATGACTTCAAGAGTGTGTAGTGTCTGATATGT<br>GTCATTACTATTTGAAATGGGATGGTGATTGTAGGATGCGACGGATAAGCTGGCCATGGATAAGGCGGTGA<br>CGCAAGAAGATGCTGAGGCGGTGTATACAGCGGAGATGCGGTTTCCATGGCGGGGGATGCAACGACGCTG<br>ATTTCTGAACCCGGTGGAGTGGCCGCATCCATGGCCACTGCAGCAAGCTGAATGAAGAAAAATGA<br>ATGGCTGAAGAGAAACACCCACCCACCCACCTCTTCCACCACAACAAGGACGAGGATAGCCCTATAGA<br>AACTGAGAGTGGTTACAACAAGACTTCAAAATACACTAGTAATGAACCTTCCGTTGGCTATGACTCTGGTT<br>ACAACAAGCCATCGTATGAGTCTTCTGGTGATGCCTATGAACTGGTTATAACAAAACATCATATGACACT<br>TCTGGTGGTGCCATGAAACTGGTTACAATAAAACATCATATGATTCTTCTGGTGGTACCTATGAAACTGG<br>TTACAACAAAACAGCTTATTTCCACTGATGAGCCTTCTGCTGGCTATGGTGGTGATAGATACCTGACACCA<br>CTGGTGGTGCCATACCCAAAAAACCGGTGAATATGCTGCCGGTGGTGGCTATGGCGATGATAGTGATCGA<br>CGTGATGATGTTGACTATAAGAAGGAGGAGAAGCACCACAGCATCTTGAACACCTTGGTGAGTTAGGTGC<br>TGCAGCAGCTGGTGCTTATGCCTTGGTAATTTTCTTTACTAATATTTATTTATTTTCTATCTTTTTCTCTA<br>ATTACGATTACATATAAATAGTAAATATTTTACAAATTAAGTGAAAGTGAAAGTGAAAGAGATAGCTCAAT<br>AATCTAAGCACTTCAATGTTTTACATGGCACAACAATATTTTCAATTTGTTTCTTAATTTTGTTTAATAG<br>AGGCTGCGTGACTGAAGACTAACACCTTCAAGTTCAAAATCTCGTATATTTGTGATATATATTTTGAAAA<br>GGGCTAATCAGTTCTCTAAAGAAATCCCAAAAAAATCAATATGTAACATATTGATTAAAAAATTAATAC<br>CCATCTTTTATTAAAAAATATCGTATAGTATTTGTGATTTGCTATTGCTTAATGATTTTGTATTAACATA<br>TATTGGCAAGACCTTATATTTTATACGTGAAATTAGGCATAAAAAATTTTACAGAAATAAATCTTATCATG<br>TTAAATTAACATGGCAATTAGTCACATTAATAATTTGTATTAATCTCTATTTTAAATAATATTAATAGGT<br>GAGATAAATGCTAAATTTAAATTTTGCCCTTATGATACTTGGAAGCAAAATTTAAAGTGACTGATATGGC<br>TTGTTGGTGAAATGGTTTGAATATATATATAGCATGAGAAGCACAAGTCAGAGAGACGACGAGCATG<br>GTCACAGGCACAAGATAGAAGAGGAGGTTGCAGCAGCGGCTGCAGTGGGAGCTGGTGGCTTTGCCTTTTCT<br>GAGCATCATGAGAAAAAGGAAGCAAGGAACAAGATGAGGAAGCAGATGGAAAGAAGCACCACACCTGTT<br>TGGCTGA |
|        | ATGGCTGAGGAGAAACACCATCATCACCACCATCACTTTTACCATCACAAGAATGAAGAACAACCTGTTGA<br>AACTACCGTCTACTCCGAAACCACATTTGATGTTGCTGGAATGTGGATGACTATAAAAAAGGAAGAGAAGC<br>ACCACAAGAATCTAGAACACCTTGGTGAATTTGGGAGCAGCTGCTGCTGGTGCTTATGCTTTGGTGAGTTAT<br>ATGATCATGATTAAGATTTTTTGTTTTTTTGTATTGTTATACACTTGTTAAATTTGATGTGAGCAATTTTT<br>CATTTTGGTTCGATTATTAATTAATTTATCTTCTTGTAAATTTTAAATTTTGACATATAGTCTAAAAATTT<br>ACTATTTACTTGTGATATTTTTTTACAATGATTAACATATATTTACATTTTTTTTATTTCTCCGCCCTTTAT<br>TTTTTTTTCTTTCAATCACATCACTGATCAGTCTTTTTTTTAACTTTTTTATGACACTTAATTTTTTT<br>TTTCTCTTTTTTAAATATCCAAAAGAAAACCTTCAAGTCCCTCTAGATTACTCAGTTTCATACTAAGATGTT<br>ACATACCCAATGAGTCCCTGCACCATACCTTAGCCTAGTTACATCTCATCTGACCTTGAACCTTGAACCTT<br>TCTAAACATTGCAATTTGAATTTGATGAGACTAACAAATATAGTTTGATAAGAAATAAAGTATAAATCTGAT<br>TATCATTTTGATATCACTAATTTTTCTACAATTATATAGTTGGTAATTAATTTCTTTAAACCTTAAAA<br>TATTATTATCATTACTGGAATATATGAATTTTTTTAAACCGAATCTCCCCACTTGACCAAAACCATGTCC<br>ATACAAGTACACATTGATTTATTTTGTAAATTTCTTTTCTATGTAACATTTGTGAATCATTTTCCATTTGG<br>TTATGAGGGGGGATACCAATGTTAAATAAAATGGTGATTAATTTGTTTAAATCTTTTTTATACATTAGCAT<br>GAGAAGCACAAGGCAGGTAAAGATCCAGAGCATGCCATAGGCACAAGATAGAGGAGGAGATTGCAGCTGT<br>AGCTGCGGTTGGGGCTGGTGGGTTTGCATTTCCATGAGCATCATGAGAAGAAAGAGCCAAAAAACATATG<br>AGGAAACACATGAAAAGAAGCATCATCACCATCTTTTGGTTGA                                                                                                                                                                                                                                                                                                                                                                                                                                                                                                                                                                                                                                                                                                                                                                                                                                                                                                                                                                                                                                                                                                                                                                                                                                                                                                                                                                                                                                                                                                                                                                                                                                                                                                                                                                                                                                                                                                                                                                                                                                                                                                                                                                                                                                                                |
|        | ATGGCTGAGGAGAAGCACCACACCTCTTCCACCACCACAAGATGAGGATAAGCCTGGCTATGTTGATGA<br>GGTTGATTATAAAAAAGGAAGAGAAACACCACAAGCATCTTGAACACCTTGGGGAACCTAGGTGCTGACGCTG<br>CTGGTGCTTATGCTTTGGTAATTTATATATCTTTGCTGAATACTATTTTGTTCACCATCGCTTATCTAAT<br>TCAACATATTTATTTATTTTGTAGTAATTTTCCCTTTTATGATATATTTTAAAGTGCAAGT<br>TTCGATAAAATAAAATAAAATAAGTGCAAAACACTTTAGCGATCTAGGGAAATATATCTCGCTCATGCACT<br>CTGAGACTTGGGCTTGTGTAAGTGCTTAAATTTCAAAAAATTTTAAATTTCTTTATCATTTGCATATAAA<br>AGTTATCATGTGTTTAAATTTGGGACAAGATCTAATTAATCCCTGAAACATGTGTACCAATAATTTCAAT<br>TTAGCTAGCGGAGTATATTTCTGTGCAATTTTACTTTGTGAACTTTGATTGTAATAGATAATATAC<br>CAAAGTTGTGTAGATAGATAATATTTTATGATGTTTGAATTTGATTAAATATAAATACGTTTAA<br>CCATACATCTCGTACACTAGCCAAGTGTGATTTTGTCTTAAATTAATTTGCTGAGTGTGTATATCT<br>TCCACTTTTTCTATGACGCTTAAAAATAAAATAAAATTAATGGATTTATCTTTGTTGCAATATTTTATGATA<br>GCATGAGAAGCATAAGGCTAAGAAAGAGCCAGAACATGCTCACAAGCACAAGATAGAAGAGGAGATTGCGG                                                                                                                                                                                                                                                                                                                                                                                                                                                                                                                                                                                                                                                                                                                                                                                                                                                                                                                                                                                                                                                                                                                                                                                                                                                                                                                                                                                                                                                                                                                                                                                                                                                                                                                                                                                                                                                                                                                                                                                                                                                                                                                                                                                                                                                                                                                                                                                                                                                                                                                                                                                                                                                   |
| CrASR1 |                                                                                                                                                                                                                                                                                                                                                                                                                                                                                                                                                                                                                                                                                                                                                                                                                                                                                                                                                                                                                                                                                                                                                                                                                                                                                                                                                                                                                                                                                                                                                                                                                                                                                                                                                                                                                                                                                                                                                                                                                                                                                                                                                                                                                                                                                                                                                                                                                                                                                                                                                                                                                                                                                                                                                                                                                                                                                                                                                                                                                                                                                                                                                                                                                                                                                                                                                                                                                                                                                                                                                       |
| CrASR2 |                                                                                                                                                                                                                                                                                                                                                                                                                                                                                                                                                                                                                                                                                                                                                                                                                                                                                                                                                                                                                                                                                                                                                                                                                                                                                                                                                                                                                                                                                                                                                                                                                                                                                                                                                                                                                                                                                                                                                                                                                                                                                                                                                                                                                                                                                                                                                                                                                                                                                                                                                                                                                                                                                                                                                                                                                                                                                                                                                                                                                                                                                                                                                                                                                                                                                                                                                                                                                                                                                                                                                       |
| CrASR3 |                                                                                                                                                                                                                                                                                                                                                                                                                                                                                                                                                                                                                                                                                                                                                                                                                                                                                                                                                                                                                                                                                                                                                                                                                                                                                                                                                                                                                                                                                                                                                                                                                                                                                                                                                                                                                                                                                                                                                                                                                                                                                                                                                                                                                                                                                                                                                                                                                                                                                                                                                                                                                                                                                                                                                                                                                                                                                                                                                                                                                                                                                                                                                                                                                                                                                                                                                                                                                                                                                                                                                       |

|          |                                                                                                                                                                                                                                                                                                                                                                                                                                                                                                                                                                                                                                                                                                                                                                                                                                                                                                                                                                                                                                                                                    |
|----------|------------------------------------------------------------------------------------------------------------------------------------------------------------------------------------------------------------------------------------------------------------------------------------------------------------------------------------------------------------------------------------------------------------------------------------------------------------------------------------------------------------------------------------------------------------------------------------------------------------------------------------------------------------------------------------------------------------------------------------------------------------------------------------------------------------------------------------------------------------------------------------------------------------------------------------------------------------------------------------------------------------------------------------------------------------------------------------|
|          | CAGCAACTGCTGTTGGAGCTGGTGGTTTTGTCTTCCATGAACACCATGAGAAAAAGAAGCTAAGAAGGAA<br>GATGAGGAAGCTCATGGAAAGAAGCACCATCATCTGTTTGGCTGA                                                                                                                                                                                                                                                                                                                                                                                                                                                                                                                                                                                                                                                                                                                                                                                                                                                                                                                                                            |
|          | <b>Promoter (ATG upstream1000)</b>                                                                                                                                                                                                                                                                                                                                                                                                                                                                                                                                                                                                                                                                                                                                                                                                                                                                                                                                                                                                                                                 |
| CrLEA1-1 | CCGCAACGACAACATACTTCCAAATCTACTCTAAAAAATTAGAGGCTTTCAAATACGTGGCACGGTAGCA<br>GTAGACACAAGGCAACCTAAAGATTATTATTGGGAAGCTTTGGCTTGCATGAATAAATTAGAAACACTCAT<br>GCTTTAATATTAATTTTTATATTATATTATCCTCCTTGAAAAAATGTCTTGCTCTGTCTGCTGGTAA<br>TTAAGTACATTTTCATTGTATTTTTGTTGATAAATTATAAATTATTCATTCTATTTTTATTACTTATTA<br>TATATATATATAATAAATAATGCATCACTTATTTTGTACCCATCCCATTCATTCATGAACAATAAAAT<br>TAGTTTTCTCATCTTCTCGCTAACTTTTAACTTTTCTTTTCTTTGAACTCAAAACCATCTTCTCAGTAG<br>CTATCTCTATTTTTGAATGCACCTTCTCTTATATCTCTCCACGTCTTCTTTCGTCAACTTCCCTTTCTAA<br>AACCAAGTTAACAATGTTTTTTATTTCACAATTTTGTGACTTGAGTTTCATTTCAGACGAATTTATTAATCA<br>CGAGAACTTTAGTATTCTTTATATTATTGACAGAGTAATTTTAAAAACAACGTTCTTTAACATGTCTC<br>AAGCAACCAAAATCTTCATTTATCTTCAAAATTTTCCAACAAAATGTGGAGTTCATTAAATTTATACGTAT<br>TAGCAAGAAATTAATTAAGAAGTTTTAAGAATTTTGAGATACATGAATCGATTCCAACGTTTCGTGACAAA<br>ATTTAATTCATCTTGTATTATTATTTTCATAACTAGACACAAAATAACCCCAATACAAGTGGTTGTTGTG<br>ACGTGTCCCTGATTTCCCGAACTGCGACGCGGTGCTACTGTTTACACGAGTTTACAAATGACACCG<br>GGCAATACGTGTCAGATGTAATTCAATTACCCTCAGAAAATGACACGAGTAACCCCATTTGACACTTGTG<br>CAGAAG         |
| CrLEA1-2 | TAATGAAGTTGTAGGAGCAATATTAAGGAGACACTTGCAAAATGCATTAGAGTGAAGAAATTTATGCAATACG<br>CTATCACTATAACTGTCTATCTCCATTGTAAATTTGTTATTGGAAATTTTTTAAATGGGTATCCTATTCA<br>TTAGTCTTTTAGTTTAGTAATCCATTGTCTGTTCGTTTTAAATGTGACAATTACTTATACATAAAATGAAC<br>ATGTAAGCATTTTTTTTTTTGAATATCTAGTCATCATTGAAGAATATCTTATTAATGATTTTAAGTTCTT<br>GTTTGAGTAACTTATATTTCTCCTAAATAAATGTTGATCTAATGAAGTTTGATAACCACAATATAGAAAA<br>TCTTAAAAATCTATTTACATTTGTTATTAGTTTGTGATACACATGATTTTCGTAATCTAGAGGTTG<br>CTCAAATTTATTTAGGAAAGTAAATCATTTATTTTGGAGGAAATCATTTAACAACAACGTCAGTTTATTGT<br>ATGAACACCAAAATATGTCTGAGGGTTCAAAATCCAAAATAAATTACGATTTAGTCTAAATGGTTCCAAA<br>ATAAAAAATATAAAAAATAAGATACAGAATAAAATCAATATGGAATAATTAATAAAAAACACAAAAAAAG<br>AGAGAAAAATTTTGGAAAGTTAGTTAAGAGTTATATAAGTTAGTTAAGGTAGTTAAGAGTATTAGGATAA<br>AAAAAATAAAGAGCAAAAAAGAGAAAAATAAAAAAGGAAAAATTAATTTAAAAATAAAGAAATATAAAACA<br>TAAAAAATAAAATCATAAATGAATAGAACCATAAAAACAATAAGAAATCAGAAAATAATAATAATAATA<br>ATAATAATAATAATAATAATAAACGAACCAATCAAAACAGAAAAAGAAAAAGAACTGCAAAATAAAATAA<br>GAAAGGAAAAGGAGCCCCGCCAAAATTCCTTGCCATATAAAAAGGGTTGAAATCTGAAAAAATAAAAAA<br>AGAGCG |
| CrLEA1-3 | TTAACTATGATACAAGTTATAATTTTTCTATTTTTTAATAATTTAACTTCAACTTATAAAACCTATTTT<br>AAATATCTAAAAATAATAATTTTATTTAAATAAATATTATTATATTTAAATATAAATTATAATTTTTAT<br>CATAAAACTGTTTAAAAAATGGGTATTATTTAAATTTGCTTTTGAATTTTAAAAATTTGATAAAATAA<br>TTCTTAAAAAATGTTTTGAGAAGAAAAATGAATGAAAAATTAATAGTACATGAAAATACAAATAACAAAA<br>AATAAAAAATAAAAAAGTAAACAGTTTAAAGTTATTTATTAATAAATGTCAAAGATTTAATTGATTAA<br>TGATTTTTAAATTTTAAATTTTAAAAAAGTATTTTGAACAACAGAAACAAACAAATCTTATAAATTTAT<br>TAAAAAATGATCTTTTAACTAGTACTAAAAACAACAGCACTGAAGGCGAATATATCTTTTAAAAAAGTG<br>ATAAAAAAGATGAGATAAACTATAAAATTAAGGTATAAAAAATAAAAAATAATAATAAATCAATAAGTAT<br>TAATTAATAATACTAATATATAAATATGTTTATATTATAATTAATAATTAATTTTACAATAATTATTT<br>TTAAAAATAAAATTAATAATTTCTTAATTAATATCCGAATAGAATTTCCATATTAACAATATATATAAA<br>TTAAACTTTTAATAATCTTGATGTCAAATTTAATTTAATACTTTATCTAAATAATAGTCAATATAAAGG<br>ATTGAGCGATGATTATGTCCAGTTTGTATGAACGTGGCGGGCAGTTGATGGGAATAGCTCTGCATGTTGA<br>ACAAGTGGTGGGTGCCATGCGCTGGGCTTGTCTTAGCTTGCTTTGCCCTCTTCTCTTTCTTCCCATATA<br>AATCGTCCCTCACCTCCAATCTTATGTCAAAGTGGCCGAACACTCCAACCTGTTTCATAGAAACACATAAAC<br>ACAACG            |
| CrLEA2-1 | CCAGGGCCCTCTACCCAAAGTTTTCTCCTTTTTGTCAGTGTTTTTCCCTCTGTTTTTTATTGATGCACGT<br>TTGGCCCTTTTCATTAAAAAATAAATATATAATAGTAATATGTTAACGAAATTTAAAGAAAAATAAAC<br>AGTTTAATTTTTTTTTTCGTGAGTGCATAATATAATATGCCACGAGTTTCGATGCAAGTTGATGATAACAAAT<br>TCAACAATTTCTTTTTTAAATGGTTTTTGGTGCATAAATTCACAAATTTATAAGTCAATAGGTTTCAGGG<br>TTTATCTGATTACTATCATCACGGCACCCGACATACCACACCCCATAAATTAATATGATCGTTAAGCAAGTTA<br>GAACCTTCTAAACAAATAATAATAATAATAATAATAAGGAAATGCTAATGAATTAATAATAATATTT<br>TTATTAATAAATATGACTATACACTCAATATAAACTTCATTTATTAATTAATTTGTTTAAATATACACCTAA<br>AAATATAAATAATAATTTATATATAATAAATTTAAAAATATTGAGAACATTAATATTAAGTTTAAAT<br>AAAAAATTTATTTAAGATTTTATTGTATATTAAATAAATTAATTAATAATTTAATTAATAATTTAA<br>TTATTATTAATTTCTTAATAATAAATTTAAATTTTCGTTAATTTTCATCATTTATAAAAAATTTAATAGTAA<br>TGTTGGGTTAAGACGATTAATATAAATACATAAATAGAAGAAAACCCCTTCCCTATCCTGTGATCTGTCC<br>TCATACCAAAATATACATGTGCTTATTATACCTTTAATTTGAATTTATTTCCAATTAATCCTTGTTTACCA<br>GCACAATCTGTTCTAGACTTTGATGCAAAATGATATTAGTAGATTATCATATTCTGTTGGGTGCAACTGTAATG<br>TAGCTGTGCTGTGCTGTGCGTTTACCTGGTCACCTTCCCATTCACCTTCTCTCTCTCTCACTCTG<br>AAAAAT   |
| CrLEA2-2 | ATTTTATAGGTAACTTTTTATTTTATATATTTAAATTATATAATTACTTAATTTAAAAAATATATTTAAAT<br>GATTGTTACATAATTCAATAATTAAAAATCATAATATATATAAATTAATACATCAATAAATAAATTTGAGCT<br>AAATATTTATATTATTATATATCAAGTATTTGTTTGATTGATTGATTTAGAAGAAAAACAATTTGTTAT<br>TTATCTCCATAAAATTAGGAAAGAGATTTGTTAAATGAATATATTTAAATTAGTTTTAATTTATAAATTTA<br>TATTTGAATGTGATTTTTATTAAAAACATTAATTTGATTTCTCAGTATTAAAAAATTTAGGAGCTTAA<br>AGGATTAATCGATCTTTGATTTGATGCGAGTGTACTCAACCGATTATTTATTTTGTGTTGTTT<br>TGTAATAATAATAATAATTAGCAATGGAATGGGTACACTCTGCTATAGTTTGGGCGAAGGGACACCGCC<br>CTGACTCCATTTCTGCCACACCACTCCAACAGCCGATAGTCAAAAAGTGTCCACTTCAAGACAAAATATA<br>GTTAATAAAAAATCAACACTCTCATCAATACTTTATTGTTTATTTTTTTATTTATATAAATTACACATTTT<br>AATTCATCTTTGTCAATAGCAACAATTTTATTCACATCCTGCAGACTAAAGGTAAAAAGAAAAAGAA<br>AAAAAATAAAGAAATGAAGAATTCATTGTGTTTCTATTACCAATAATAGCACTTAATAAAAAATAAAAA<br>AGCAGTAAAAATAAAAAATAAAAGGTTCTACCTATGGTATGGTATGGTCTACGCATCTTTGTCTGTTT<br>ATACCAAGAAATTTGCAGTTTCTTCTTTTCTTAACCATTGTGGGGTTGGTTTTTGCTCATCCTTT                                                                                                      |





|           |                                                                                                                                                                                                                                                                                                                                                                                                                                                                                                                                                                                                                                                                                                                                                                                                                                                                                                                                                                                                                                                                                                                                                                                                                                                                                                                                                                                                                                                                                                                                                                                                                                                                                                                                                                                                                                                                                                                                                                                                                                                                                                                                                                                                                                                                    |
|-----------|--------------------------------------------------------------------------------------------------------------------------------------------------------------------------------------------------------------------------------------------------------------------------------------------------------------------------------------------------------------------------------------------------------------------------------------------------------------------------------------------------------------------------------------------------------------------------------------------------------------------------------------------------------------------------------------------------------------------------------------------------------------------------------------------------------------------------------------------------------------------------------------------------------------------------------------------------------------------------------------------------------------------------------------------------------------------------------------------------------------------------------------------------------------------------------------------------------------------------------------------------------------------------------------------------------------------------------------------------------------------------------------------------------------------------------------------------------------------------------------------------------------------------------------------------------------------------------------------------------------------------------------------------------------------------------------------------------------------------------------------------------------------------------------------------------------------------------------------------------------------------------------------------------------------------------------------------------------------------------------------------------------------------------------------------------------------------------------------------------------------------------------------------------------------------------------------------------------------------------------------------------------------|
|           | ACTTCC                                                                                                                                                                                                                                                                                                                                                                                                                                                                                                                                                                                                                                                                                                                                                                                                                                                                                                                                                                                                                                                                                                                                                                                                                                                                                                                                                                                                                                                                                                                                                                                                                                                                                                                                                                                                                                                                                                                                                                                                                                                                                                                                                                                                                                                             |
| CrLEA2-8  | <p>AATTTAGTGCTAATTACTTGAAAGTTATTAAATATCGAAGTTCATATGAATTATTTAAAGTAGATTGTGAG<br/> TTC AATT CAGTTGGC ACTTTATTTT TGGCTAAAAATGCTCAAAACAAATTTCTATCTAAAAATATATATATT<br/> TTTCATTTTCAGTAAATTTATGCGGACCCAATATTGCGCCAAAAAGAACAGGTTGGATTGGGGACAGTTAT<br/> TGCCACAATTTGGTTCTTAGCATTTGTATGGCAGTCTCAATCATCTCATACACAAAAGTTTGACAGTGC<br/> CAAAGTGTTTTATTGAAACAACCGTAAATACCTTAATACCTTAACATGACTAGGTTACATTATAGGCTTTC<br/> TACAGCTCAAGTGTGAAC TTTATGTTGCTGTTAATGTGCCGAATGTTTTCTGGCGATAGGCTAAAAGCTT<br/> ATGTTGTACACTGAACTTCGCTCCGCAATTCATTGCAAAAGATTAAAGAAAAACAACTTGTTAGAGAAA<br/> GTGATTGTGTCTTTAAGGTGCACCTAATTACCGGTAAACCAAATATACGTTAAAAATAGGCCACTTTGTG<br/> TCCCAAAGTGCATGCATATTTCAAGGGGCGTTTTCTTATCTTTTGATGGGTTTTATTGTTTGCATATTACA<br/> TTCGTTTCACTAATATGTTTTCTTGCATGTTGTATTAGTAAACCATTACTATATCCTTTTGAAAAGAAGGTG<br/> AACAAAGCCTAAAAATTTGCAATTTTTCAGTAAATTTAGTGCTGAATTTAACCACCCTAATGAGATGCGTG<br/> TGCGTGTGACAATTTTG CAGAGTTTATCATTTTAACTTTGATAATTATATACCAATCAACACAAGGGAT<br/> GGCCCAAGTGGTGCAGTCAAAAGTATGGTAGCAGGCATAATAATTGTTGCTTTCTGCTCTCTTTATAAACC<br/> CCTGACCCTCTTCTTAAAGTTGTAAACATCCCTCCTTCAAGCTTCAACTCTCTCTTCTTCTATCACTATT<br/> TTACAA</p> <p>TAATATAAATATTATTGTCTTACAAAATTTATATTTTTTACTATTTTCATTTTAAATTTTAAATAGTCTCTTA<br/> ATTAAATAATAAATTTTTTAAACATATTAATTCAATTTCTTAAATTAACCTACATCCTTATACAATCAA<br/> ACATATTTAAATATAATTTAAAAATATAAAAAATATTATACTAAAAACACATGCTCATCCCTCCATCCAAAT<br/> AATTTTAAACCTTAAAGTTAAATCTAATTTGTTTTTATTGTTAAAGAATGATAAAATTTAAATTTTCATGT<br/> ATAATTTTCAACTATTTCACTACTAAAAACAATTAATAAAATTAATATAATTAATTAATTAATTAATTAAT<br/> TAATAATAATAATACAAATCTTAATCTAATATAGAATATTTCTAGGTTAACAAAAAATACCAGTTTCAAT<br/> TTGGTCTTATTTAATTTACTTTAATAAAAAAATTTTCATCAATTAATACCTTTGTTCATCCATCAAGTATGC<br/> TTAACTTATCTAATTTTTTCGAACAACTTTACGTTTCATTTCCATCTTCAATTAATTTTCCGTCCTCGGATC<br/> TATCTTTCACATAACATAGATTTCATGATGATTTTCAAAATTTATCGTAATAATTTTATCACTTAATATG<br/> TAAAATTATGTTATTTACTTATATTTTAACTTTTAGGTGAAACAATTAATAATTTCTCCTTTATATCATT<br/> TTTTATTAAATGTCATGATTTGAGTAGATTTAATCTTATCTTAAAAAGTATCTTAATTTAGATTATACAT<br/> CATCTAATTTCTTCACTTTAAAGAGTTTGAATTTAAAAAATTAGTCACTCAAAATTTTTTATCAAAATGAG<br/> ACATCCTCTTACACATATGTTAATCATGTTATTTTGATATATAAGTTGAGTTATACACGTACTTTTAAAG<br/> ATTATATAATAAATATTTAAAAATTTAAATATATCTGTCAATAAATAATATACTTAACTTGAATAAAGA<br/> ATAAAC</p> |
| CrLEA2-9  | <p>TATGCTTTCTAATTAATTAATGTGATTGATATGTACAATATACTGTTATTGGTTTGATTGTCAACTTAATT<br/> TGTATATGAATCTAAGTGAGATTAAATTTCTTTCAC TGAAAAGCTGAAGTTTGATAAGTTTCATTCTTTTC<br/> ATCTAGTAATTTTGGTATCAGAAATCAACTAAATCCCTACTAGCTCAAGTCGATTTCGAGTGATTTATGTGC<br/> ATAAGAGAACAAACTTTT CACAAGCTCGTATACAGTGAAGGACTTCATTATATAAGGCAGACAATAAAAAA<br/> TGCTGCGGAAAGCATGACAAGTACACTTTTAATTAATAATGTTCTTTGTAACTAAAATATACTAAATCTTT<br/> TATATATATATATATATATATATATATACACAATATAAAAAATTATAAAATTTGAACATGAATCCTTATC<br/> TAAAAATTATTTTAAATCATCAATTTATTTATGTTTACCAATCTTAATCATTTTATACGTAACCTATTTAGAAA<br/> GAACGATTTTAGAAGGAAAGAAGGCAAAAGGCTGAAC TTTATTTTAAATAAATAAGCC TACTTGTATTTT<br/> TTTATTTTTTTTTAATTTAATGTATGTGAATTTTGTCTTTTAAAGTGTTTTCAACAATTTAAATTTTTTT<br/> ATTTTTTAAAAAATTAACGAATTTAATCTTTTCATTAATTTTTTAAAAATAAAATTAATAATATATAATTTTA<br/> AAATCAAGAATAAAAAATTTGTGAGCCCTTCTTTTCTCCCTTACAAAACTCCCTCCTAATCGATCTTAAAAAT<br/> AATTTGTAATGTAAATATTTTAAAGAAAAATTTTACCCTCCATCCTATTATATCTGAATAAAATAGTTT<br/> GATGATTAATTTAAATTTATTTAATTAATTACTGATAATAGAAAAATATAATTAATAATTTAATATAAAT<br/> AATGAATAAATACTAATTTATTGTTAATTAGGCAGTGTGATTGATATCTACCAAGTATTTTAAATTAATAT<br/> TCGAGT</p>                                                                                                                                                                                                                                                                                                                                                                                                                                                                                                                                                                                                                                                                                                                                                                                                                                                                                                                                                                                                                                                                                                                          |
| CrLEA2-10 | <p>TATACCTTCTTCTTCTTTCTTTTGT TAAAGCCTATTGACCAGCAAAGCTGTCCTTAAAAAATAAAGGAA<br/> ATTATCATGTAATGCCAAAAAATGAAATTTATATATAAAGACATGGTTTGATATTTTGTGTAACTTAA<br/> TAATTTTTCTTATTTTTTAATCTAATTTTACCCTACTAAATACAAACCATCACTTTATCCTGGATTAATA<br/> TTAATTTTGAATATTAAGTACTATTTATCTGAAAAAAATCTTTAGTTATCTATACAGTAATTTTCAATTC<br/> GTTATATTTGAATGCAAATGTCTAATTTATTAATTTTTTAAAAAATAAACCATTTAATGGATAGAACA<br/> GAATAATTTATGCCCTATTCATTTCTTCATTTCAACAATCATTTTATGCCCTATTAATTTTTTAAATTAAGAG<br/> AATTATATTTTACAATGATAAATAAATAAAGAAATATATTAATATTTAAAAATATATTTATTTATGATT<br/> TGGAGGTAAC TATTACCAACGTAAACCTTACGCCATCTAAGCTCATTCAAGTCATTAATATACCATAAGTGT<br/> AAGATCTAATTAACAAATATACGAACATAATGTATGAACAGTAGTCCATTGATTTGTATTTAATAATTTAAA<br/> ATAAAAAAATAATTAGACGGCTTACATTCATATGCAAGTCACTGTATATACCTGACTCAAACCTTTTCAG<br/> CTATCAATGTACATGAATAAAAAAATTTGAATAGGGTGGAAAAGGTTAGTGAATGGCGTTGGAATTTCAA<br/> CATTAGAGCACAGAAATTCAAATTTGTTGAAATTTGGACTTATGCTACTAAAGTCAACTAATTTTAAAGGAAT<br/> ACAGGCCACACTCACACTGCTACCTGCACAGTCACACTTCACATCAATTCCTTAGGCCTAAAGTGAATGAT<br/> AAATGAAGCAAACCAAAACAGAATACACACAATTTGTGTTCCCAAACTAACCTGAATTTTCATATTCCAAA<br/> ACAGGC</p>                                                                                                                                                                                                                                                                                                                                                                                                                                                                                                                                                                                                                                                                                                                                                                                                                                                                                                                                                                                                                                                                                                                                      |
| CrLEA2-11 | <p>ATAATTTTTTTTATTTAAATTTGAATAAACCGTACTGTAAACCTCTCAAGTAACCAGTATTTGATGGTTTG<br/> ATGTTGACACTGCCTATTCATTGTTAACAACCTATGAAAGAAACGCTACTTAACTTTTCATGTTATCATCTT<br/> ACACTTGATAGTTGATAC TCCCAACAAGAAACAACCTATTTTATTTTCTAATAGATTGAAATGATTTGTT<br/> TCTTTTCTAATCTCTCTAAATAATTAATGACACGTCATAAAAAATCTTTCCCTTTTAAATTTGTAACATTT<br/> TATTAATTTTCTTTGTTGAGTGGCAAGGAACCTGAACCTGAACAGATAAGGGAGGAGTGAATGAAATGC<br/> AATGAGATGCATGCAAATACTCCTTACATATCCATCCACATTTAAGTTACTAACGAAGCCCATCGGCATTG<br/> CTTTTTGTTGTTATCTTCATGCATTAGCAATTAAGCCCTCATTATTTTCATAGCTTTTTTATACAACCAA<br/> TCAACTCTATTTGAAAAAGAGTTTCTTTAATCTTCCAATGCATCCAATGATCGACCTATCATCTACAAGG<br/> ATATAAATGATTCGCATTGTTAATTTACGTCACTTCTTATTCACATACGTAAGTTAGTAAAAGCAAAGAAAG<br/> AAAAGAAGCTTGAATAAAGACAAAGCAAGGCATAAAACAGAAAAAAGAAAAAAGTAAAACACAT<br/> AGCATCATATACATGAGTGAGGAAGTACTTTATTTTGCTTGCTAAAAAAGAAGATATACACGAGTAAGGTG<br/> GTCATGATCAGCCATTGCTCTAATAACTTTGATTCCAAGTTTCCCGTTAATTCATCTAGATTTCCCT<br/> TTCACTTTTTCACCTATAATCTCACTACCCTCAACCCCTCTTTCTTTTCTAGCTGTCAACACATAACCA<br/> TATTCATATTATACATACACACTTAGACATACACAAACCCCTTAAGAGATCAACGAGTCTCTCACCATG<br/> GCAGAA</p>                                                                                                                                                                                                                                                                                                                                                                                                                                                                                                                                                                                                                                                                                                                                                                                                                                                                                                                                                                                                                                                                                                                                                 |
| CrLEA2-12 |                                                                                                                                                                                                                                                                                                                                                                                                                                                                                                                                                                                                                                                                                                                                                                                                                                                                                                                                                                                                                                                                                                                                                                                                                                                                                                                                                                                                                                                                                                                                                                                                                                                                                                                                                                                                                                                                                                                                                                                                                                                                                                                                                                                                                                                                    |

|           |                                                                                                                                                                                                                                                                                                                                                                                                                                                                                                                                                                                                                                                                                                                                                                                                                                                                                                                                                                                                                                                                                                            |
|-----------|------------------------------------------------------------------------------------------------------------------------------------------------------------------------------------------------------------------------------------------------------------------------------------------------------------------------------------------------------------------------------------------------------------------------------------------------------------------------------------------------------------------------------------------------------------------------------------------------------------------------------------------------------------------------------------------------------------------------------------------------------------------------------------------------------------------------------------------------------------------------------------------------------------------------------------------------------------------------------------------------------------------------------------------------------------------------------------------------------------|
| CrLEA2-13 | TAAGCCTAACTTTAACTAAGATAAAATTTTATTTAATACCATTGCTCGATAGAAGAGTGTTCAGAACATTT<br>TCAATCATCCCCAAAGTTGTGAACGGGGAGACATCTGTAATTTCTACGAAACATGTTTGGATCAAGCACAC<br>ATGTCATTTAATTCAACTGAAACAATGAAACAGACTCAAGAACCTCCTTCTTTATGTTGCTGCTATTAAT<br>TGTTTTTATCCAATCAATGTCGATCCATTTTGACACAAAACGATGCCATTTCTAAGTAAATTAGCTTTCAA<br>CTTGATTCTAAAACTATGATTTTGTAAATTTGATTTCTACCGGCAGATCCGAAAACGACAAGGCATCATA<br>TACCGTTCGAAAACAAGAAGGAAAAACTGAAAAACACACTTTCTCAAAGAAAAATATGTAGCAGAACAAATTT<br>TGTGGGTTTGAGAAGGGGTTTAAATAAAAGCTTAAATTTGTGAGAAAAGGTCACAAACATGGTAAAGAGGTCA<br>ACCATCAGTTAATGAGAAATAATATTTTCAAAAATGGGAAAAATTCATAGCAGTTTAAATGATGAATAGGT<br>AGAAAACATAAAGAAGCAATGGAAGGTATACAATCAATCTCAGGGAGAAAAATAACAATAAGAAGGTAATA<br>AATCACTTTGGCATTAGCTGGTTGATTATGTGAATGATTATTGAAATAATATGATTGTAAGGAAGTAGAAG<br>TTGCAACTGCTTACCTTGTGTGGAGATAGAGAGGAAGAGAACAAATTTGAGTGTGATTGTGTGATAGAGT<br>AGACACAAGTAAAGTCAGTGGGTTGGGATGTTGGTATCTGTTGCTTTGGTAATTGAAACCCACATTTTC<br>CTCTTCACCAAAATTCATAAATTCATCTTTTAACTTCAATCCACACAATTCCTCTAAACCCCTTTCTA<br>TCTCTCTCTCTCTCTCTCTCTCTCTCTCTCTCATTTTCATTCATACACTAAAACCTCTTAACACACCATCTT<br>CCTTTC              |
|           | TTATTATCACTATAGTTATAAAGACATGGTATGGTTTTTCGTAAATAATAACAGGGAAGATTGGTTGTTTTGA<br>TAAAACTGAAAAGGGCAGGGGAGAATAGTCTTCTTAAGCGAAAACATGTTATAAAGTCTACACCTAAATAC<br>ATGTTATAAAGTGAGAGTAGTTACTAAACTAAGATTTCTGCTATTGATCTTCCGCTTGATGCGTTGGCAAAT<br>ATTGACATGATATATTAATTAACAATGTAGAAAAGAACTGCTGCTACAAAATATACTAAATTAATTAATTG<br>CCTATTGTAGAACTCATTGTTTGAAGAATTTAACCATGGAGAAAATTTGTGGTTCTTTATGTCATTGA<br>GTTATGCAGACTTAATTTATTTCTCTTACTTTAATTATTTTAATTATATTTCTTTAACATTAATAATTT<br>AATAATATTTTAAATTTTAAATATGAATTTTATAGAAAAAATAGTTAATATGTATGATTAAAAGAAATAATA<br>AAAAAAGCAATGCAAGTGATGAAAAAGAAAGCATGGAAGAGTCAATGCCTTCTGAAGTGGAAGCTGTGG<br>AAGATCCTCGAAGCAGCAGATTGAACGCACAATCATCAATTGAGGATGCACACGCCAAAATGGAATAAAT<br>TGATACATGCGAAAGCAACCGCGTTTGAACGGAAAACTCCGCAGTCCACACCTTGAGAAGCACTTATT<br>CAACACACTTTGCGGTAGCTCCTCCAGTTAATTTTAAATTTGTTTTGTAGATTATCACGCGCTTTTTCAA<br>TTTCTGCTCCACAGGCCACACACGCATCCTCTTATAAATATACTATTCTCCCACTCTCGGTTATAAAAT<br>CACACACAAGAGGAATCTCCCAATCTCTCCATTCCCATTCCTATAACCTCTTTGTTTTCTTTGTTTTATA<br>ATATTCATATTCTGATTATTATTATTATTATTATTATTATTATTATTATTATTATTATTATTATTATTATTATT<br>TCAACC                   |
| CrLEA2-14 | ATATAAGAAAAATTAATTTCCCAATAAAAAAATGGAATTAATAATTACTCACAATCTAAATGTGTGAGATAG<br>TAGAGAAGGGAGGTGTTAATCAAAGATGAAAAGAAAGAAAAAAGTTGGAATTTCAAAGTTGGCAATGA<br>GATGCCATTATTAGGTTATAACTTCCATTATCTCATAAACTAAGATGAGGAATAATCCTTAATATAATCTT<br>TTAGAAGGCATGCATTAGGATAACTGTAAAGATTTTGAATTTGTCAAGTTTGTAAATAATGTCAGATTTATG<br>TCCATATAAAAGTTGAACCAGAAACAATCCCTAAGAATTACTTTTATATATAAAATTTATCAAGTTTATATA<br>TAAAAACATGAATGACGCATTATATGATATTTTATTTGAAAATGGATTAAATTAAGAGAAAATGTTAGAA<br>TTAATTTTAAATATTTAAATAATAAATATTTATCATATTAATATAAAAAATAAATAAATTAATTTTAA<br>TAAATAAATTTGTATATTTAAATCAATCTTAAAAATGAGGATTTGAATGAGTATATAGCTAATGTAA<br>TTAAATAGATTAAACAAAAGAAGGTTACGTGGAGGCAATGAGAAGATGAAAAGGGCGTAATTTTGGATAAGA<br>TGATGAGAAGCATTAACGATATGGAGAATTAATAATGGTTACCTTGGCGCCTTCTATCTTAAAGGGAGTT<br>TTGTTCCGTACGAATATTTCTTGTTCGTGGTTGTTTTGGGCAAAACCCATTCTACAATTTACATAAAAGTT<br>TGACCAGTCAACACAAGCGCTATTCCCTTTTCATAGGTTGAATTTGAATTAGGCAAAATGCGGAGGAACACG<br>CATGAGTACTCGCAAGCGCTTGTTCATAGAAATCTTCAATGCGCTTCTTCTATATATACCTCTCCCA<br>CTCGCTTCTCATTACAATTCACAGCATATTTCCCTTCATAATTTCTTCTCTTCTCATTCTCATCTCATCT                                 |
|           | ACAACC<br>TCCAAATGATACATAAGGATAGTGAATTCACGAAAGAATTAATCTTGACAGTATACTTAAACGAAATTTA<br>AATAAAATAAATTTAAACCTTTACATATAATTACAGTATCAAATTTTATTCCTCTGTTCTACTTCTCA<br>CGATTTTACCAGTATTCTTAGTTTTTTTGGCCACCACACTCTGCTGAGAAATGATAACGAAACAAAGTCACG<br>AAGCGGGAGGGAGCCACATGCATTTATTAGGTGGCAATCTAAAAACATGCAGCCGAAGAGACATTGTTTGC<br>AAATAACACGCTAACAAAGTCAGCAATATCTGATTCCTGGTTGTAGGCCATGAATGATCAAACTTCCCAA<br>TTATTTTTCGCTAAGGTTGTATGGACTGAACAATGTTATGATAAGGGTGGGATAATTGAACACCACTCTC<br>TACGGGCTTACTAATCTGACGATTTTCACTTTCAATTCAAAATCTGTTAATATCCCTTCTCAATTCCTCA<br>GAAGCCTCTATAATTCTATCACTATGACAATAATGAGCCAAAGTTATGCAAGGGAAGCTGCTGCAGAGTCC<br>TCAAAAATTCCTTCACAACCAGCATAATTGAATTGGTACCAAAATGATGTGACATTTTAATTGACTTAGGT<br>ACTTTTAAATTGAAAAGATAAAGAATAAAACAATAATTGAATAAAAAAATTTCAATGGTCCGGTTACCACG<br>TATACGTGTCTAGCCAGCAAAATTAACCTCAATCGTTAATAATCATGTAAATATAAATGAATCAATGATCTT<br>ATCATATCATTTCAAACGTAACATATATTTATTTATTAATAAACTTTCAAAGTAATAAAGTAATAAACTTCCT<br>ACCCCCCCCCCCCCACCTTCTTTCTACTCTCATTTTCATCACAACCCGGGTGTCATCACTTGCGCTCCCA<br>CTTCTTTTCATAGCCTTATTATACTCTGTGTGACTCTCTGTTGATTTAAAAAAGTCGATCGCACAGGACA<br>GTAACG      |
| CrLEA2-15 | AAATATAAAACCGTTTACAAATTTTCGTAATAATTTATCATTTTTTATTTTAAAGATATGGTATATTATTTACA<br>ATAGAAATAAATAATTATTATTTGATTACATATTTAAATAAAGTAAATTTTATATTATACATGAATATCAT<br>AATAATATTACATGATTTAAGAACTAGATTAATAAAATTTACTATAAAATAAATATTATTGGATATATCATA<br>TATCCTTTTACTAAATTTGATGTCTAAGATAAATTTGATTGTCTCGAAAATTTGTTAATGATACATTTTAT<br>ATCTTTATTATTAAATGAAATCCCGTGTGAAACATATTAATAACGTATTTCAGTCTTCATATGTGAGTCAG<br>TATGAACCATGAAATTTTCATCTTAGAAGACCGAAAAGAAAATCTTGCCTGCATGTATCATTAGAGTCTCTT<br>TAAGATTTTAAATTAAGTCTCCCCAAGCACACCGGAATATTATTTTTTTTTAAAAAACAACCTTAGGAATTT<br>GGAGATCTCAACAATAACAATTTGATCTGATGAATGATTTTGGCTACAATTTTCTCAATTTACAAACCACA<br>ATTGCAAAATCTTACTTGTGTGCACAATTCAAACCGGTTTAAAGATTATTTTTGAAATGCAACCTCTTTCTG<br>ATTTTTTTTTTAAATTAATTATTGTCTCATTCAATTCGCGATGACAGTAAAAAGAAGTGAATAGAGAAGCCGAA<br>ATGAGGGGAGAAAAACGTAGAAAGTTAGGAATGAAAAAATTAAAAAAGTAAACGACATTTGGTTGTGAAAG<br>TGAGGAGAATTAATAATGAGAAGCTGGGGCTTAAACTTTAGTCGAAATCAGCGAATTTTATTTCAAGTCT<br>CCTTTATAACTTTTATCTGCTCCACTCCATATCCATTACAGTCTTGCTCCTAAGTCCCTATCCCGCTGTCTC<br>CTCCAATTTTCGTTTTCTCTTCTTCACTACCCAAATCCTCTCTGTCTTCTCAAAGTTCATACTTGCCAATA<br>CCCAGA |
|           | CrLEA2-17                                                                                                                                                                                                                                                                                                                                                                                                                                                                                                                                                                                                                                                                                                                                                                                                                                                                                                                                                                                                                                                                                                  |
| CrLEA2-18 | CATGATGTTGATTTAAAAAGATAGAAGCTTTTTTTTTTTTCTGATAGAGTAGACCCCTTTTCTTTATCAGTTA                                                                                                                                                                                                                                                                                                                                                                                                                                                                                                                                                                                                                                                                                                                                                                                                                                                                                                                                                                                                                                  |

|           |                                                                                                                                                                                                                                                                                                                                                                                                                                                                                                                                                                                                                                                                                                                                                                                                                                                                                                                                                                                                                                                                                          |
|-----------|------------------------------------------------------------------------------------------------------------------------------------------------------------------------------------------------------------------------------------------------------------------------------------------------------------------------------------------------------------------------------------------------------------------------------------------------------------------------------------------------------------------------------------------------------------------------------------------------------------------------------------------------------------------------------------------------------------------------------------------------------------------------------------------------------------------------------------------------------------------------------------------------------------------------------------------------------------------------------------------------------------------------------------------------------------------------------------------|
| CrLEA2-19 | AAGACTTTTCAGATACAGAATTTAAAGTTTCTTTTGGTGGATAAAGATTACAGAACTCTTTGTATATGAGA<br>AGTGTCAAGTTGGGTTTATTTTATAAAGTATATTTTCTATTAATAATAAAGACGTTTCAAGATGTTTTTA<br>ACACATTTTATATTTTGTGTTTTTAAAGTGTAATAATATATATATTTTATTAATAAAATGTTAAT<br>AATCATTATTTTGGAGTTTGGATTAAAAAATTATTAGTATACGTTATTAATGCATTAAACATTAATATA<br>ATATATTATCAATTATTAAAAATTTAATTTTATACATAAAAAATCTATATTAATCCTGAATAAATTTTGT<br>TTTGTTAATAACTTTTTTTTATAATGGAGGATCACAACGTGTGTTCTAAAAAAATCTATTTGCTAGCCTGTT<br>TTCATAACTGATAATATATGATGTAGAAATTGACTTCTTTAACTCATTGAGCTTTTGGTAAAAAATTCATA<br>ACCGAATAATTTTAAACATAGTTTTTGCACATTATCTTTAATATAAAAAATAGTGAAATTTATATGAATCTTA<br>CTAAAAGATGAAAAAGGAGGGAGTGATTAGATATATTTGGTGGAACTTAAATAAATTTTACAATAGAGATG<br>TTAAGAAGGTGTATTGGCATTCCCTCCTTGGTATATATCTGAAGGAAGCCATGGTCTTGACTCTTGTGTATT<br>TTAAACATAAATAGTTGCTTCCCGCACAGATTTTCCCTCAAAAGGTTTTGGTATCAATAATTTAGAAAGG<br>AATAATTGAGCGCCACTGTCAAAGAAAGACATCCCATTCGTCTTCGCATTCAAGTAGTACCATAATTA<br>ACAATCTAAGCGAATCAAACAGATTGCATTAATTACACTCGAGTTAATTAGCCGAACTCCAGAATGATAA<br>TTTGTA                                                                               |
|           | CAATTGAGAATTTAATGTGTTTTTTATATTTAAAGTGTAATAAAAAACTGCCTAATAGTCACATTTTTTC<br>TTTTGGTTTTTTTTGTCATTTTTTAGTTCGTAACAATGACATTTGCTTTTACACTAGGAGAACCATCATTTT<br>CGGTAGGTATTATCTATTTTATCAACACGGTCATGTTAATCGCAAATACTCAAAGGATCAATTGTTGGTAAA<br>GAGTAATTTTGATATAGTTTCAAGGCACTGTCATGTATAAATATTTTTTAAGTTACTGTAATTTATTCCA<br>AAAAAATAATGTATATGATATTTATTTATACATTAAAAAATAATGATTGATTTATATATAAACATCATT<br>ACATTCATCTACATCCTAATAATATTTTTTATTTTTTAAATAAAAAAATTTATTAACCATTAAGCATG<br>AAAAATAATATAATATATTTTTTAAATATATGATGATCATTTTATCTTAATTTATATATATATTTTTTA<br>ATTACAATTATGTTATTTAAAGAAATTTTCGTATTCATTCTCACATTATTAATAATATTTATTAATATATC<br>TTCTTTCACAATTTCCAACATTATTTTTGAATAAAAAAATTAACTTTTGATATGTTGGTTGGCGAGAGGGTA<br>TTTTAAAGTATAAATATTTTTGCAAATGCAGTAAATGAAAGTTAGATTGAATGTTGGTGTGAAACAGTGG<br>AAGGCAATTAATGAATTGTTTTGAATTTATGTGAAATGCATGAATTTAGAAAGATGTGTTTAGTAGCAGTT<br>GGGGACACGGAATTGGAAGGCGCGCATTAAAGTTGAGAGTATGCACAATTACTAAACGATTTGGACCTCAC<br>ACAACCAACCAACTTAGGATATTAACATTATTATTATTAATATATGTTTGGCACTTGCATATAGGTAATC<br>CATAGCTATCAAATCCTCTCTTAGATCTAATCTTCACACTTGTCTTCTGTTTTGCTAGTTTTATTGGGTCA<br>GCATTA |
| CrLEA2-20 | TGTCTCGTGGTGTGGTGTACCATGACACAGTACTGATTCTTGTTAATAATTTGTTAATTAAGACCCCAAC<br>AAGAATCAAATGATTGGCCTGTGCATCAAAATCTTTTCTTAATATATCTGAATAAGGAAAGGAAGAACTT<br>TTTCCTTTTTTTTTTTTCCATTAGGTAAACATTTAGTACAATAAATATTTTCATATTTTTGAAAAAGCAATG<br>TGTAATAAAACTCTTTTACTTCTGTACGTGAGAAAAATTTGAGCAATAATTGATTATATAAATTATTAATT<br>TTTCATGACAATTAATATAAATATATGATATTTAGATATCAAAATTTAGGAAGATGATATCTTTAATAATT<br>TTATACTAAAAGTAAATTTTATACGCTCTATCTGTTAAATTTAAAGTTTTTAAATAATATATTTTTTACA<br>AAATTTTACTTTTATTATTTTTTATTTTAAATGTATATGAAACATTACTTAAATATAAGTAAATAATTA<br>TTATCAAATTATATATTTAAATGTTTAAATTACGTAATTTTATGTATATAAATTATTAAGATGTTAGTTT<br>AATAAAATTGATACTTGATATATTTTATCCGGACTTAAATATATATTGTTTCATGAAAAATCAAATAATA<br>ATTAAACACATTTTTAAAAAGTTTCTAAGAATCCTATTTTCAGAAATCTCACTTCCAACAAAGCAGTCTAA<br>TTGGAATGAAATATTTTGTGTAGCATTTCATTAATAAATATTTTCATGAAAGGTTGTGTTGTTCTTTAA<br>TTCCCGGCATTCCGGTGGTTGTTATAGTCCCTCAAAGTACAAACATAGCATTGATGTTTTAAGCCAAAGTA<br>CAGGTTCTTCCCATGGCATAGAAATAGAAACACCTTATAGAACAGGAAATATTCCAACTCAACGCTCTTTT<br>GGCACTGCAAAAATATACAACATTTTTAATGGCCGATTTTATTGTTGTTAATTACTTATTACTTATCCG<br>ATAATA   |
|           | TTAATTTAATTTACTTCAAGTATTAACCTGATTAAATGTTAAATATGATTATATTTTCAAATTTAAAA<br>ATATATGCTTTTTAAAAATATATATTTTTATTAAAGTAAAAAGAAATATATTTTTAAATTTATAATAGTAT<br>ATTCATATTCAAATTTAAATTAATTTATATAAAATAAAATAAAATTAATATATATTAATAAATACATT<br>ATCTGTTAAAAATAAATTAATATAATAAATTAATTAATTTTAAATTTTATAAATATAAATTTATATTAAT<br>AAAATTTGTTAATTTAAAGATTAATTTATTAATTTAATTTTAAAAAAGATATTAATAAAGTAATTC<br>ATAATAAACTCAATCTTAAATAAATTAATTCCTCTACCTTTTTTATTTATATATATATATAATAAATAA<br>AGAAAAGATTGATCATTTTAAAAAAATAGAGAATAAAAAAATAAGGATAATATTTTTATTTTAAAAATTA<br>AAATAATACATATTTATTTGTGATTATAAATAAATGAACAATAAATTAATTTATTTATTTATTTATTT<br>TAAAAATTTATTAATTTACTATATATTAATTTAAAAATAAAAGTTTATAATTTTCTTTTTTTTTTTAAG<br>ATTCTTTTTTCGAACAACCTTTAAATGGGATAATTGGATATATGTTTTTAAATTTTTATGGTAAAAAAA<br>GATTTTTATTTTCTATATTTATTACAATAAAAAAATAATAGTTTATAATTAAGAGTTAAAAATAAAAA<br>AAAAATCTGTTTTCTTTTTACTGTTATATATAAATTTTTTAAAAATAAATAAATAAATAAATAAATAA<br>ACAAGAGAACAAATATAGAATATATCTCTCTTTATTTTGGTTTTTACTTAAAGTAACTCTCTCCAA<br>GATTGTCCAAATGGGCGGTACGGTATGACCTGACACGCAACATAAAGTCAGAAAGTCGAAACGACGGCGTA<br>ACGATC                          |
| CrLEA2-21 | ATATTTCAACAAAATTAATTTATACAAATTTATTTTATTGAGTGTCAACACAAAAAAATTAATTAATAATATA<br>ATTTTAAGAGATTTAATCTTTTCAAAAAAAATTAATCATAGCATAATTTTGTGATTTTTTATATTTATTA<br>CTTTTCATAAGATAAAAAATACTTGTTACACCTTCTCTCAAATTTTAGCATGAATTAAATTCAGTTAATA<br>TAAATAAAATATCATATATTTTAAATAAATAGTGTTGTATCATACCTCTTAACACTGAACACTGTAAAA<br>ACCATGTTTCAGTAGTTTCGTGTTCAATCAGAACTTGATCACGGAATTAACAGTTGCAAAAAATAAAT<br>ATAAATTTATTAATTTGTTAAATGAAATTAATTAATCTGATATCTATTATATTATCTAAAAATAAACTTC<br>TACCTTTTGTGACTCATGTGAGTTGATTAAATTCATTTTATTTAATTGTTTCTCAGTCTCATTTATACTTT<br>TCATTACTTTTTATTGAGCTTTATTTCTTAATTTAATCAAATATTCAAATATTGAAGATATAAATTCACA<br>ATAAGTGTACAAATCGTCTTTTTATACTGATATCCATTCAAATCTTTAATTAATTTTACAATCATTTAT<br>TTGTTGTCCACAAATTTATTGTCCTAAATCAACGATATACCTTTTAGATTAGTCACCTTAAAAAATTTAT<br>TATCATGTATTCTATTGATCTATTATTCTATTATAATACACAACACAAACATTTGCAATCCATAAAT<br>CAATTCATCATATACATATATCATTTACCAACGTATCTCTTTAGATTAAAGTAAATCTATAAAAAATAA<br>AAAAAGAGATATATTATAAAATTAGGCCACAAGATTACGTTTATAAATTTGGCTTATATTTCTATATTTAA<br>ACCTGGTATGGTTGGCTTCACTCTAAAAACAAGAAATTCACATTGTTGGTGCATCTTCAACTGGCTCTGC<br>AACATC          |
| CrLEA2-22 | TTTTTTCCTATTTATATCAATCGAAACAGTTTATTTTTTTATTTTATTTTATTTTATTTTATCCTTCA                                                                                                                                                                                                                                                                                                                                                                                                                                                                                                                                                                                                                                                                                                                                                                                                                                                                                                                                                                                                                     |
| CrLEA2-23 | ATTTTTTTTTTAATTTTTTTTTTAATTTTTTTCAACAAAGTATAAGAAAAAAATAACTGCATCCAAGTAT                                                                                                                                                                                                                                                                                                                                                                                                                                                                                                                                                                                                                                                                                                                                                                                                                                                                                                                                                                                                                   |

|           |                                                                                                                                                                                                                                                                                                                                                                                                                                                                                                                                                                                                                                                                                                                                                                                                                                                                                                                                                                                                                                                                                                                                                                                                                                                                                                                                                                                                                                                                                                                                                                                                                                                                                                                                                                                                                                                                                                                                                                                                                                                                                                                                                                                                                                                                                                                                                                                                                                                                                                                                                                                                                                                                                                                                                                                                                                                                                                                                                                                                                                                                                                                                                                                                                                                                                                                                                                                                                                                                                                                                                                                                                                                                                                                                                                                                                                                                                                                                                                                                                                                                                                                                                                                                                                                                                                                                                                       |
|-----------|-----------------------------------------------------------------------------------------------------------------------------------------------------------------------------------------------------------------------------------------------------------------------------------------------------------------------------------------------------------------------------------------------------------------------------------------------------------------------------------------------------------------------------------------------------------------------------------------------------------------------------------------------------------------------------------------------------------------------------------------------------------------------------------------------------------------------------------------------------------------------------------------------------------------------------------------------------------------------------------------------------------------------------------------------------------------------------------------------------------------------------------------------------------------------------------------------------------------------------------------------------------------------------------------------------------------------------------------------------------------------------------------------------------------------------------------------------------------------------------------------------------------------------------------------------------------------------------------------------------------------------------------------------------------------------------------------------------------------------------------------------------------------------------------------------------------------------------------------------------------------------------------------------------------------------------------------------------------------------------------------------------------------------------------------------------------------------------------------------------------------------------------------------------------------------------------------------------------------------------------------------------------------------------------------------------------------------------------------------------------------------------------------------------------------------------------------------------------------------------------------------------------------------------------------------------------------------------------------------------------------------------------------------------------------------------------------------------------------------------------------------------------------------------------------------------------------------------------------------------------------------------------------------------------------------------------------------------------------------------------------------------------------------------------------------------------------------------------------------------------------------------------------------------------------------------------------------------------------------------------------------------------------------------------------------------------------------------------------------------------------------------------------------------------------------------------------------------------------------------------------------------------------------------------------------------------------------------------------------------------------------------------------------------------------------------------------------------------------------------------------------------------------------------------------------------------------------------------------------------------------------------------------------------------------------------------------------------------------------------------------------------------------------------------------------------------------------------------------------------------------------------------------------------------------------------------------------------------------------------------------------------------------------------------------------------------------------------------------------------------------|
| CrLEA2-24 | <p>AAAAAATATTTGATATTTATTTTAATGTTTTGTTTTGTTTGGATCACGGAAAAAATAGAAAGAAAGAAA<br/> AGTAAAGAAAGAGAAAAAAACATAAAAAAAATATTTTGAACAAAGTAGAAACAAAAAAAGAGAAAAA<br/> ATAAATTTTTTTTTTCATTTGAATGAATGAAAAAATATACATATATATATTAGTATTATAAATTTTATTT<br/> TATATAAATTTTTAAAAATATTTTATTTTGTACTATATTTTTTTATAAATATAAATTTATAATTTTTTATTT<br/> TTTTTTAAAAAATAAATACTAATTTTAAATAATTTAAAAATAAATAAAAAAAAACTTCTCGCTCACTTTT<br/> TCACTCTTCATGACGAAGAAAAAAATAAAAACATGTGAGTTCTGGAGATATATATATCCACTTGGATACC<br/> GATCCTCTCATATACGCGTAGTTGGTTAGATATTTATCATGTGAAGTTGCGGAGAAAGCCACTATATAGAA<br/> TTAATGGTAAGATCTAGTGGGCAAGAAAGATAGATACTATGTCTATTAATAATAGGGAAGTTTTCTCACTTTT<br/> CACCAAAAAAATCAATTAATTATGATCTTTGTGGACGCAAAAGTCATTACGGTCTGACGCGTCCGTACCCT<br/> ACTCGTACACGTTTTGGGTCAATCTCTCTTTTCATACACAATTCTTAGCTGTTAGCACCCGTCAACTCCAAG<br/> CGAAAAATTGAATTAGGCAAAATTGACGAACAATAACAAATAAGCACAAAATGCTTACTATATTTACATACC<br/> CCTCCTCCCATCACTAAACCCACTTCATTCATCCGCTTCTAGTTAAAAATCTACTATTTTTCTCTAACTGT<br/> TATGTT<br/> TCCATTACCTTTAAATTTTAGAAATACACATTAACATATATTTCTTTTTTTTACTTTTATTTGAAAAGTATA<br/> AACTATAGTGTATAAATATTAATAAATAGTAAATCCACTGTGTTTCGTAATTTGTGACAAACGCCAGAT<br/> AAAATGTAAGAGAAAGAACGTGCTCTTAATAAATGTGCGAATTTATGTATCTTTTATTTATTTTGGGA<br/> AAATGATTTAAAAAATAATTTCTGGACATAAACTATCCGCAAGTTAATTCGACCACGTGACAATAACTA<br/> CCGAAAAATAAAGTGTAGATAGTAAATCATATTTTCGTTTTATATAAAAGTTACGTTCATAGTTTATAATG<br/> AATTGTCATTAGCGAGCGATCCATGTCTATATGTAAAAGTGGGTACTATATAAAGGCGTGGCATACAGTA<br/> CCATCACAGTAAGAAAAAGAACATCGTAGCTACGTACTTATATAGAAATTTAGAGAAAAATAACAAAACCTGGC<br/> AAGTTAAACTTGGAAAACGTTATGCTTTTTGTTTTGTATAAGTAGTGGGACACAGGCGAAATGACCAAACTC<br/> ACCCTTCCCAAATTTTCACAACTTAAGTAACCTCCTCAAGAGCAATTTTTTACAAAAATAAAAAATAAAA<br/> TAAAAGTGATTAAAGGATACTTACAATAGATAAAAAATAAATTTTGATAATGTGGATGGATGTACGATGAA<br/> AGCAGCCTCCACCGTTTCATAGCATCCCAAGACTTGAATATAAGATGATCTTATCATATCTCCGAA<br/> TACAACAGTTGAACCTACAAATAGATTTAACACCAAGGCGCACACACATTTACAGAGCGTCAACTACA<br/> CGAAACCTCTCCACCCATTCCTTCACCTCACTCATACCAACCACCATAGCATAGTTACACGCTCCTCATAG<br/> ATATCACTCTCTACTTCAATCTCACAAAAAGCCACCAACACAAAACAAATTAATAAAAAATAAAAGAAAAAT<br/> CAGAAG<br/> CACGAGGTCGGCATTTTTAAGATTTATAAATTTGGTGATACACACACGAAATTTCCCAATACTGAAATCTGAAG<br/> TGGCCCCAGTTTTAAGGCAATTATGGTCGACACAATAAATTCAGCACAAGCGTAGTAGTTGTACTGTACTG<br/> AAATCTGAAGTACTGAATAATTTCTAATTAAGATGGGCATGCATTACAATTTATAAACCTCAGTGGATTG<br/> GATTTGTAATTGTATACATTTCTTTGTTTGGTTTCAATTTTAAGGAATGTCTATCACCCAATTAAGTAAAA<br/> AAAATTGCTTGTTTATGTTTTTCTTAAGACCTAGTAGTATTTACCAGTGTACCATAACGCTCTGTTGTAAA<br/> GTATGCGAATCGTAGCCTGCCTTAATGTGCAAGTAAGGTTTCCTTTATGCAAAGCAAGTTCAAGAATGTC<br/> AGTACATCTATCTCCTCATTTTATGTGAAGAATTACAGTCACTTGCCATGCAATTTGTCTAGTTGAAATGA<br/> CGATGCTTGGTGCTTAAACGCATTTGTTGATCATCTCTCACACGGGAGTGAAAGTGGCAAAATCAGTAATATG<br/> TAAAAATTTCTAGTAAGACTAATTATATAATTAATAATAGAACTGTACAGATATGAAGTGTGTATAAGGAT<br/> TAAGGAGCATTTGTTCTCGTAGCTTAATGCCAACGATTCGTGCACACCGACATCACTCCAGGTGTCTTAGGC<br/> TCAACAAAGGAAAAATGTAGAAAGGAACCTTGTCTCTGACGCAATATAACAAAGTGTCAATATTTAGATGA<br/> ACTAACCTCTCTATTTCCGTAAATTTACATGTTCTTTGTTGGTGGGGAAGGTACACACACACAGTACCT<br/> TTTGAGAGACTGAACGATCCATCTTCCAAATTTTTATTTTCACATTTAGAAGTCAAATAAGGAAAGTCTGA<br/> ATATAGCAGCAAAATAAAAGGCCATTTATCACCACAAAATTTGAGAGGAGAGAGCACTCAGCAAAATCACTT<br/> GTATTC<br/> TAAATTTGTAAATCATCTAATACTTAATTTGGGCCTACATGGTGACTTGGGAGTTAGGCAATGATCTAAAT<br/> ATAAAATTTGGAGAAATATATGCATATGGGAACCTAACATATAATATGTATATCCTTGATCTCCTTGCCCTAG<br/> AGTTTCGTATATATACCTTTATGCTACATTATACGAAACCTTTATACCTTATTTCCCATCTGAATAATTACCCA<br/> TCATTTCTTAAATTTATCCTTCGCGATATATATAAGATGCATGATCATGATATAGAACCTTATTATTTTCATC<br/> ATTAAACCTTTGGCAATATATAAAATAAAGTTGCTGCTCTATCTCTGCAATAATCAGTACTTTTAAATTA<br/> AGAAGTTTAAACTTACCTAGAGTGTTAATAAGCAAAAGCAATCTATTCTCTGATGTGAGTCTAAATTCG<br/> AACACTTTTACTGACGAATACATCTAAAGGAATAAACCTTTGGGCCTTGATTAGGGGAAGTGAGTTTCAT<br/> ATGAAAGTGATTGCTTTTCAAATAAAATTTACATCTAAAGTGATTACTTTTAAAAACGTACAAAGAAACAT<br/> AGTTTCATACGGAATTCGCACTTACTTCTGTCAAGATAGTTAATACTGCGTGATGCTATCTTAATCTTAGC<br/> TGTTCAAAGTCTTTATGTGTACGCCAGCATTTTGAAGATAAGGTTAAGTGTACATTGTTGGATCAAGTAG<br/> CTCCATTTAAAGTAACCAAGTGTGAGCTATTATAATTCCTCAAACGAGATGCAAAGGAAAAAGCTAACAC<br/> AGGAAGAAAAAAAGAGTGTTCCTTTCTTAATTTTCGAGGATATGCAAGTGAATACGATAGAGAAAGCTT<br/> ATTCTTTTCTTCGTCCATGTACCATCAACAGTCTGTTCTTTCTTTCTCTCTCTCTCTCTCTCTCTCTCTCT<br/> ACATAACCGCAACCAACAACCACAAGCGTAGTTTCATTTCTCAAACGCATCCATTATTTCTCTAAATCACACAA<br/> ATCAAA</p> |
| CrLEA2-25 | <p>GATAAAAAATAGAAAGAAATGATCTATACAAAATTAATTTTACATATTTTCTTAGAAATATAAAAAATTAAT<br/> ATTTCTTTTTTTTATCTATCTATAAAAAATAATATACACATAAATATAAAAAATATAATTAATATTATAAAT<br/> TTAAAAATATTTATTTTTTAAAAATATTTTTATATATAAATTTTAAATTTTATCTTTCTTTATTTATTTTCGGT<br/> TATGATGATATATATATATAAATAATATTTTTTAAATAAATTAATAGATAAAACATAAATAAATTTTATAT<br/> TATCCTTTTGAACAAATAAAAAAGATATATATGAAATATTTTACAGACATTTTAAAGATATTAATTTGTT<br/> TTACTCTTATTTTTATAAATTTAAAAATAAAACGGGATGTAGAGAATTTTTTTAAAAAGGTATTACTTTATCA<br/> GGAAATGATATTGTAAAAACAACCAAACTATTCTACACATTTATCCACGTATTGAATATATATATATATAT<br/> ATTAAATTTAATTTTATAAGTTCTTTTTTGACCAATGAATAAGTGAGATAATATTAAGCCGAATAGCCAA<br/> AGAAAGTACTTCCCTCCATCACTTTTCGAACAACAAAAATACATGTTTGCCAAATTTTATGGAATTAATAAT<br/> ATCAATTTAAAAATATTTAAAAATAAACTTTATAAATGAACCAATTTGTATTTAAATTTATGGAATTAAT<br/> TTGCACTTTTAAATTTAAAAATAAGAAATATGTGGCTCTTAATTTTAAAAAACTTATTATGGTTAAACAAGA<br/> AATCAAAATATTTAATATTTATAGCTAAATTAATTAATTTAAAGTTTAAAAACGAAAGATTTAGAT<br/> ACAAAAAGATTACCTAAGAGTGAAATATTTATAATAGTAATATAAAAAAGAAATGGGAAATCTAGTGGCA<br/> TCTGACAAAGTCCAACCTCCACATATTAATTACTTGGCACGAGCAAAAGCTTCGTAAGCAGTAAGAAAG<br/> AGAGAA</p>                                                                                                                                                                                                                                                                                                                                                                                                                                                                                                                                                                                                                                                                                                                                                                                                                                                                                                                                                                                                                                                                                                                                                                                                                                                                                                                                                                                                                                                                                                                                                                                                                                                                                                                                                                                                                                                                                                                                                                                                                                                                                                                                                                                                                                                                                                                                                                                                                                                                                                                                                                                                                                                                                                                                                                                                                                                                                                                                                                                                                                                                                                                                                                                                                                     |
| CrLEA2-26 | <p>ATATTAGTATTATGGTATTTTGATTGAGAGTCAATAAGTTGAAGTTCAATTCGGATTACACAAAAAA<br/> AGTTCAATTTTCGATTGAAATTAATTTTACGAATTTATCTTTAAAAATTAATTTTATATATTTTTC<br/> AAGTAACTTTAAAGATGATGAGTTATTTTATTATAATTTATATAACATATATTTTATTTTATTATA</p>                                                                                                                                                                                                                                                                                                                                                                                                                                                                                                                                                                                                                                                                                                                                                                                                                                                                                                                                                                                                                                                                                                                                                                                                                                                                                                                                                                                                                                                                                                                                                                                                                                                                                                                                                                                                                                                                                                                                                                                                                                                                                                                                                                                                                                                                                                                                                                                                                                                                                                                                                                                                                                                                                                                                                                                                                                                                                                                                                                                                                                                                                                                                                                                                                                                                                                                                                                                                                                                                                                                                                                                                                                                                                                                                                                                                                                                                                                                                                                                                                                                                                                                                            |
| CrLEA2-27 | <p>ATATTAGTATTATGGTATTTTGATTGAGAGTCAATAAGTTGAAGTTCAATTCGGATTACACAAAAAA<br/> AGTTCAATTTTCGATTGAAATTAATTTTACGAATTTATCTTTAAAAATTAATTTTATATATTTTTC<br/> AAGTAACTTTAAAGATGATGAGTTATTTTATTATAATTTATATAACATATATTTTATTTTATTATA</p>                                                                                                                                                                                                                                                                                                                                                                                                                                                                                                                                                                                                                                                                                                                                                                                                                                                                                                                                                                                                                                                                                                                                                                                                                                                                                                                                                                                                                                                                                                                                                                                                                                                                                                                                                                                                                                                                                                                                                                                                                                                                                                                                                                                                                                                                                                                                                                                                                                                                                                                                                                                                                                                                                                                                                                                                                                                                                                                                                                                                                                                                                                                                                                                                                                                                                                                                                                                                                                                                                                                                                                                                                                                                                                                                                                                                                                                                                                                                                                                                                                                                                                                                            |
| CrLEA2-28 | <p>AAGTAACTTTAAAGATGATGAGTTATTTTATTATAATTTATATAACATATATATTTTATTTTATTATA</p>                                                                                                                                                                                                                                                                                                                                                                                                                                                                                                                                                                                                                                                                                                                                                                                                                                                                                                                                                                                                                                                                                                                                                                                                                                                                                                                                                                                                                                                                                                                                                                                                                                                                                                                                                                                                                                                                                                                                                                                                                                                                                                                                                                                                                                                                                                                                                                                                                                                                                                                                                                                                                                                                                                                                                                                                                                                                                                                                                                                                                                                                                                                                                                                                                                                                                                                                                                                                                                                                                                                                                                                                                                                                                                                                                                                                                                                                                                                                                                                                                                                                                                                                                                                                                                                                                           |

|           |                                                                                                                                                                                                                                                                                                                                                                                                                                                                                                                                                                                                                                                                                                                                                                                                                                                                                                                                                                                                                                                                                                                                                                                                                                                                                                                                                                                                                                                                                                                                                                                                                                                                                                                                                                                                                                                                                                                                                                                                                                                                                                                                                                                                                                                                                                                                                                                                                                                                                                                                                                                                                                                                                                                                                                                                                                                                                                                                                                                                                                                                                                                                                 |
|-----------|-------------------------------------------------------------------------------------------------------------------------------------------------------------------------------------------------------------------------------------------------------------------------------------------------------------------------------------------------------------------------------------------------------------------------------------------------------------------------------------------------------------------------------------------------------------------------------------------------------------------------------------------------------------------------------------------------------------------------------------------------------------------------------------------------------------------------------------------------------------------------------------------------------------------------------------------------------------------------------------------------------------------------------------------------------------------------------------------------------------------------------------------------------------------------------------------------------------------------------------------------------------------------------------------------------------------------------------------------------------------------------------------------------------------------------------------------------------------------------------------------------------------------------------------------------------------------------------------------------------------------------------------------------------------------------------------------------------------------------------------------------------------------------------------------------------------------------------------------------------------------------------------------------------------------------------------------------------------------------------------------------------------------------------------------------------------------------------------------------------------------------------------------------------------------------------------------------------------------------------------------------------------------------------------------------------------------------------------------------------------------------------------------------------------------------------------------------------------------------------------------------------------------------------------------------------------------------------------------------------------------------------------------------------------------------------------------------------------------------------------------------------------------------------------------------------------------------------------------------------------------------------------------------------------------------------------------------------------------------------------------------------------------------------------------------------------------------------------------------------------------------------------------|
| CrLEA2-29 | <p>TTAACTATTATATCCTTTTTTTTTGTTTATTATATATATTTCAATTTGGTTAGGCATTGTTATATTCTTTTA<br/> AAATATCATAGAATTCTTAATAATTATTTATTAATAGTTAACTTTTAATTAATTAAAAATATATAAAAAA<br/> TATATTTATATTAATCTTGTAAACCAATATTTTTAAAAATACTAATAAAAATAATTTAATTCATTAAAAAC<br/> TACGTTGATATAAATTTAAAAACATACTAAAGATACATTAAATTATATTTTTTAATAAAAAAATTTTATTT<br/> AATCAACGCTCTTAAAAATATTGGATAACATATTTCTATTATATATAGCATTCTTCATTTTTAAAAATATAT<br/> ATTATAAATATGTCAATTTTTTAATTTTCATTTATTACGTCAACAAATAAATTAGTTATCTACTTTTTATA<br/> CATTTTCAATAAAGTTCAAATTCAAATAAATAATCGTATCATACAGATAAATTTTTAATTTTTTTCC<br/> GGAAACCAATATTTTCATTTTGTGGAAGATAATTTTATTTGACTAACAAACATTAAATTTATGATATG<br/> AGCAAACCTTTGGAGTAAATTTTTTCATATAATTTTTTTGTAAGGTCCAGATATCTCCTAAAAACATACAA<br/> TTTTTGTGGAATAAAAAATAAGTAAGAGGAATTTTAAAAACAATAACTATTTAGTGTGAATTAACACACTG<br/> TATAAACACTAAAAATATGAAATTGTTTTGAGTGTTAATTTATAATAGGAGTGGTATTATTTTATCCTT<br/> TCATTT</p> <p>ATCTTCATGTTAAATTATACTAGATTAATTTTAATGGCTTAATTTAGTTTTTAGTTTTAGTTTTAGTTT<br/> TTTATGCTAGTTTTTAACTTATCAAAAAAATTGATAAAGATGTATATATAATTTTCTGGTGAAGAATAC<br/> CTTTTTTAAAAAATATTACGAATGATGATGTTGTATTAAAAATTATTTAAATTTATGATCCAAGAATGGGA<br/> GGAAAAAATCAACCTTGTAAATTTGACAGTGGTAGTGTCGCTCTTTGTTGATCCATAATCAATTTATTTT<br/> TAATGTATATTCCGAGATACATGATAAAAAATTAATAAATAATAATTTTAATATAAATTTAAATATTTAAT<br/> ATTATCTATATATTTGATCTAATTTATATATATATATATATATATATAGAGAGAGAGAGAGAGAGAGA<br/> TTTTTTACATACCTTAGAAAAACGTAGTTTAATAACTATAGTGTGACTCTTAATACTCCATTACACAGTAAG<br/> ACTGCTCAATTCAAACATTGATTTATAACCAAAATGAAATATGATAAAGGTGGCATAAATGTGATTTAGAA<br/> AACATGAATAAGTTAGTAAATATTTCCATCTTGACGGGTAGCCATTAACTGTGCACATTATGTTTCTATG<br/> CATCAAAATGGTTAAACCATGGTTGCTAGAGTCTATATACACACTGCGGTGTATATTACCTTACCCCAT<br/> CCAATTTGAATCTACATAAGGGGCACCTTTATACCGACAGCTATATTACTTGCGATAGTATGTTACTATATG<br/> TAACGTGACGCTTGAATCTGAAGAAAAGAACAAATATGGTGTCCCGAAGAATCCGATTAATCTTGAGT<br/> TTCATGCACGAAATTTCTGAAAGCGAAAAGTGGTATAAAAAAAAGGGTTGAAAGGTAGTTATATATAGT<br/> ACATAGCAATATATAAGGATGGTATGATTTGGTTGTTGAATAAACTCTACATGCCCTGAATAATATTAGT<br/> GTTGAA</p> <p>GTGATGATTGATTTTTCAATATCAAAATAAATATAACTGTGAAAAATAAATAAATTTATGTGCAAGAATAAT<br/> TGTGTTATAAGAATATACATTATATATCATTTTATATTTATATTTATATAAAAAATAATAGGAAGAATTCTAC<br/> TTGACAAAATACTTATTAGTAATTTGACACCCCTTCTACTTGTCTCGCATGTCTAATCTTTGCCCTCTCTGT<br/> TTTTTCAGTACATATACAATACACATTGTAATTTCTCCTCCTAGGATGCTATACGAAAAATTTTAGAGGCCAT<br/> GGGGAATCATTTGAATATATCTTTTAGCTTTTGGTACTTCAAAGTAAACCTTTTTTTTTTGCCCTTATCATTTG<br/> TAAATAATTCAGTCAGCAATCTGCTTTTGAGGACCTTATCTTAGCCAAATAGAAGAATGAGCTATAAATTAT<br/> CTTAATTCATCCGTGCTGAATTCCTTATGGTTGAGATTCGGCAGAAAGCTGGCCTAAACAATTGATTGATT<br/> GCTTTTAAATGAACATGCACCTTTTCCGGGTGGGTGCACCTTCTGCCTTCTACGATTCTTCTAGTGCTTAAA<br/> CATCTCAATGTAGCACATACCTGGTTTACTTTAATATCATGGGAGGCGTTGTTGAAGCCCTAATCTAATTC<br/> ACTATCCTCCAATACATGCACCATGTAAAATTCATAGCCTTAAACAATAAGCAATGAACAAAGTGTGAAC<br/> TCATTTCTTTAGGACCTTCATAAACTTAGCGGCATACCAAAGCATGAACATTAAACACCAACGTTGGCACA<br/> CTTTAGTTCACCTATAACACCTTTTGACAATACCCAGATAAACACAGTGTCCCACTCCACTACTTATTA<br/> TTCAAGTAAAAAACCTCTCTTTCTCCTCATTTCTTTTCAATCCATCAACACCCCATTTAGATAAATA<br/> AAGATATCACCACATCTCTTCTCATCCTTTGGTTGATCGGAGTGGCCTTTTTTTTAGTAGTGTGCCTAC<br/> TCAAAC</p> |
| CrLEA2-30 | <p>TTATAATATGATAAAATATAATATATCTTAGAATACATCGTAATTTATTTTATTATGATGTTGTAATTTAA<br/> TTTTTGAATTATTAATAAATAATATATTAATATGATATAAACTATTATGTAACCTTTAAGTATCATGTAA<br/> ATTATTATGTCAGTTAAAAAATATCTGAATTTAATTTATTTATATCAAACTCTATCGTCATAATTTTTATTT<br/> ATCTAAAAATAATAAATTAGTTTATATTAATAAATATATCTTTAAAAATTAGTCTATCTACAATTTAAA<br/> TTTATTTTGACATATATATATATAATTTATTTTATAATAATAATAAATATTTTCTATAATATAAATAA<br/> TTATTTTATTTTATTTTATTTTATTTTCTTATTTTAAAAATAAATAATATTTTATGATAAATTAATTTT<br/> ATATTTTAAATAACTTTTATCTGTAAATTTTATTCAATGTAACTTATGATCAGATTAATTAATTTTTTA<br/> TAATATATATATATATTTAATTTTAATCCTTCTAATATTAACATAATCTTATAAATTTTCATTTTTTAT<br/> ATTTTATTAATTTTATCAATAAATAATAAATAAATAAATAAATAAAGTTAAATTTATTTTAAATAAATTT<br/> TAAGTTAAGTTAATAATTAATTTCTAAATTAGATGAACATTTAAATAAATAATACTTATTTATTTTCTT<br/> TATAAATTTTAAATAATTTTATAAATAAATATTCATATATTTAAATTTATATAAATAATATATATATATTT<br/> CATAAATTTATTAATAAATAACAGAAAAATAAATAATTTGGATAGAAAAATTTATCTTATCCTCTCATCCT<br/> ACACATTTAAACGACACAAAAATAAATAAATAAATTTATCTGTCTATTTCTCATACCTGTATCATCCGAC<br/> GGCTCTTAAGACTATTTTCTTACCCTTAATAACGTTAAATTTGAAATTTTGAAGAATTTGATAGCAATTT<br/> GAATTT</p>                                                                                                                                                                                                                                                                                                                                                                                                                                                                                                                                                                                                                                                                                                                                                                                                                                                                                                                                                                                                                                                                                                                                                                                                                                                                                                                                                                                                                                                                                                                                                                                                                                                                                                                                                                                                                                                                                                                                                                                                                             |
| CrLEA2-31 | <p>TTTTATATCTTTTATTTATTTATTTTATTTCTATCGTCTTTATCACAGAAATATTCTAAAAATAAATAT<br/> AAAACTTTTATAGTAATAATCAAATTTATAATTAAATATTAATAATCTCTAAATATAAGGAAAGTAAT<br/> ATATTTATATATCTATAGTGATTTTATATCTATATATATTTTAAATTTAATTTATTTATAAAAAATAATTTTAT<br/> AACCATACAAAGGATAAATATGGATATAATGGGTGTATGAAAGGAAGAAATCATTTATGCTGAATATAA<br/> AACACATACTAAACCTATGAAAAATACTTACCATGCCCATAGCCCGTGGACATGGATGGACCTCCCC<br/> GGGTAGTACAAAGGAAGAGAATGAGAATGTGCCAAACTCAAAATAAATTAATTAATAAAAAACATGGGACT<br/> GCTGAGAGAGAAATTTATTAATATTTTAGAGCAAGTTGTGTCTGTTGGCATGAGACTTATTTTAGGCAT<br/> AATCAAAAGGCGCAAGATACAAATTTAGGAGGCCCTTTTACTTGAATATTAGTTTTTAAAGCAAAAGGAT<br/> TAGAAAACTGATTAATTTTGTGGAAGACAAAGGCATGTTGAAAGATAATTTTATTTTCTTCTATATTT<br/> TACTTTCTCATTTAAACAATAGATGACTCTATTAATGAAGAGATCCTTCGTCTTATTGAAAAGGAAAAA<br/> ATGATGTATGTAAAAAGAAAAAGAAAAAGAGCATATAGGCTGGAGGCCAATGGAAAGAAAGAAAAAC<br/> CGTGATGGCAACTGGGCAAGCGCAATCACAATCCCGTGTGCTCACATCAAAATCCAAATGGTACAGCC<br/> AAACACTCCTTGACCCGTTGCTTTAGTCTCTGTTTCTTCTATAATTTTTTTCCAACTTGCCAACCTTAA<br/> GCGATCCACATGAACTGTACCCCACTTCCCTTCTTTATTTATTTACTTATTCACATATCCATTAACATAT<br/> TAACAC</p>                                                                                                                                                                                                                                                                                                                                                                                                                                                                                                                                                                                                                                                                                                                                                                                                                                                                                                                                                                                                                                                                                                                                                                                                                                                                                                                                                                                                                                                                                                                                                                                                                                                                                                                                                                                                                                                                                                                                                                                                                                       |
| CrLEA2-32 | <p>ATTCTTAGATAAATGTGTGATTTGTCAATTCATCTAACAACATATTCTTAAACCTAGCTGAATTTGTGTTAA<br/> ATATAATTTTAGTATAGCTTTAAATAAATAAATAAATAAATAATGATAAATAAATAATTTGTTTAGTATAG<br/> TGATAGTATAGCTCTAAATCATCCAATTTGATTTATTTTTTTGTTGTATCTGATTTTCACACGCCATTTAT<br/> CTTTCAATGGTTATTAAGTTTTTTTACAACCTTAATAACTATAAAAGAGCAATTTGGTTTGTGGTACTTCTAT</p>                                                                                                                                                                                                                                                                                                                                                                                                                                                                                                                                                                                                                                                                                                                                                                                                                                                                                                                                                                                                                                                                                                                                                                                                                                                                                                                                                                                                                                                                                                                                                                                                                                                                                                                                                                                                                                                                                                                                                                                                                                                                                                                                                                                                                                                                                                                                                                                                                                                                                                                                                                                                                                                                                                                                                                                                                        |
| CrLEA2-33 | <p>CTTTCAATGGTTATTAAGTTTTTTTACAACCTTAATAACTATAAAAGAGCAATTTGGTTTGTGGTACTTCTAT</p>                                                                                                                                                                                                                                                                                                                                                                                                                                                                                                                                                                                                                                                                                                                                                                                                                                                                                                                                                                                                                                                                                                                                                                                                                                                                                                                                                                                                                                                                                                                                                                                                                                                                                                                                                                                                                                                                                                                                                                                                                                                                                                                                                                                                                                                                                                                                                                                                                                                                                                                                                                                                                                                                                                                                                                                                                                                                                                                                                                                                                                                                |

|           |                                                                                                                                                                                                                                                                                                                                                                                                                                                                                                                                                                                                                                                                                                                                                                                                                                                                                                                                                                                                                                                                                                                                                                                                                                                                                                                                                                                                                                                                                                                                                                                                                                                                                                                                                                                                                                                                                                                                                                                                                                                                                                                                                                                                                                                                                                                                                                                                                                                                                                                                                                                                                                                                                                                                                                                                                                                                                                                                                                                                                                                                  |
|-----------|------------------------------------------------------------------------------------------------------------------------------------------------------------------------------------------------------------------------------------------------------------------------------------------------------------------------------------------------------------------------------------------------------------------------------------------------------------------------------------------------------------------------------------------------------------------------------------------------------------------------------------------------------------------------------------------------------------------------------------------------------------------------------------------------------------------------------------------------------------------------------------------------------------------------------------------------------------------------------------------------------------------------------------------------------------------------------------------------------------------------------------------------------------------------------------------------------------------------------------------------------------------------------------------------------------------------------------------------------------------------------------------------------------------------------------------------------------------------------------------------------------------------------------------------------------------------------------------------------------------------------------------------------------------------------------------------------------------------------------------------------------------------------------------------------------------------------------------------------------------------------------------------------------------------------------------------------------------------------------------------------------------------------------------------------------------------------------------------------------------------------------------------------------------------------------------------------------------------------------------------------------------------------------------------------------------------------------------------------------------------------------------------------------------------------------------------------------------------------------------------------------------------------------------------------------------------------------------------------------------------------------------------------------------------------------------------------------------------------------------------------------------------------------------------------------------------------------------------------------------------------------------------------------------------------------------------------------------------------------------------------------------------------------------------------------------|
| CrLEA2-34 | <p>ATAATAATTTTTAATTAATATTATTTATACACATTTTTATATACCTCTCATCGCACTTTCTCTCTTTTTTC<br/> CTTTAAAAAACTCTCCTCTCTCTCCCTTTAATAAAAAAGAAAGTGTAAGGTTGTTAAATAAAAGATGC<br/> AAGGTAATCAATTGATATTACTTAAGAAATAGTATATTAAATTAGCCACCTTTTTTTTACAGTTTAAAT<br/> AATAAAGTATATGCTATTATATATACTTATGAAATACACGGCACCATAAGAAAAAATAATATCGTCCATAG<br/> TTTTTTATGTAGCTGAGTAATTAATTAATATAGAGAATAATAAAAGGCTAGAAAAGTATATAGCATAGT<br/> ACGTCATGCTGCAAAACCTTGAATGGAAAGCAAGAAATTAAGAAAGAACCTTCGGCGGCAAAACATTAT<br/> ATCTTATTATATAAACACACAAATATTGAATATGGTCCCTTCGTATGACATGTGATTGAGAACAACTCTC<br/> AACTTTAAGATAGTTTATACCTTTTGGCCATTCAAGTCAACAAAGGGAAGCTTCAAGCCTCAACGTTTCTT<br/> ATAGGCCATGACTTGCTCAAATCAAACGTGTTTCATGTCAACCTTCTATATATTAACATACCATAGAAACCA<br/> CATAAAGGAGAAAAAATAAAAGAAACCAACAATTAACTTTTTTCTCAAATTTTCATTGGGATTTTCTGAAA<br/> CCAAAG<br/> GTTTACATTTTGTCTTTCTTCGACCTACAACCTCAAATTTTGGCACTATTATCAATGAGAATTGGAATTTGG<br/> GTTGCATTGATGGAGCAAATATGTAATTAGTACAACAAGATATATATATATATATATATATATATATAT<br/> ATATTTATGTAAAAAATAATACATGATAAAATACAATGTCAAAGGTAACGATAACAACATTAAAAAAATTC<br/> ACAGAGATATATTATTTGAATGATAAATTTATATAATAATTAATACAACATATTCTTTTTAATTTTCTCT<br/> ATTACGTTTTTTTATTAGCAAAATAAATTTTCTATTATATTATTTATCATTTTATTTCTTTCTTTCT<br/> AATCACTCTTTTATTAATTTTGTACATATATTTGTAGTATTAACATTTTTCATATTCAAAATTGATTCATG<br/> GATGTCCCTAGACTTTTCATCCAAATATCATATGCATGATAAGTAAATTCCTAGTTATGTTCTATAATATCAA<br/> GCAAAGCGTGAACATCAATGTGTAAGAAAGAAGTGAACAAACACGAGATCGAGATGATATCAACAATTTTT<br/> AATATACTCAAAATTTTATAATTTTAACTTCTCAACAAGGCTTCTTGTACCCTTAAGCTTAAGGTTAATTG<br/> TCCACCTACTTTTGTGAATACATCATAAAATACAATGAAATAATTAATAAATAAATAATATAATATAATAA<br/> AAAGAAAAATAGAAAACTGATGAAGAAATGTAAAGAAATTAGGTGTATATATAATGATTAGTTTGTAA<br/> GATTCCTCAATCTTCATTACTCGGTTTGTAAACCCAAAAGTCAATGCCTTTGTGTGCCTGTATAGTGGAG<br/> GAAGTCACTAGAAAAAGCGCAACAAACACCAACATTCCAAATCATCAACGATTAAACCTCAAAATAGC<br/> CACATAAAATGTCACACATCAATCACCAGAGCTTCTCCTACCAACAATTACACACACCACACAAATAAGC<br/> ATCACC<br/> CATAAGGGACTGCTAGAAGTATTAATAAATAAATAAATAAATAAATAAATAAATAAATAAATAAATAAATAA<br/> ATGATATTTCTACATCTAGATCATGTGTTAATTAATAAATAAATAAATAAATAAATAAATAAATAAATAAATAA<br/> CAATTTTTTAAATTTTATACTTGGTTTTAACTCAAATTTGTATAAACTTTTACTTTGAGTAGGCATCATCGTT<br/> AAATCCTCATCCGTAAATATATATATATATATATATATATATATATATATATATATATATATATATATATAT<br/> TTGAAACAGTTTTTAATAATATAGTAATAATTAATAATGATACATAAATTTATATTTTGTCTAAAAATATA<br/> TTTTTATATCAAGAGAAGAAAAATTAATAAATAAATTAATTTGTATATTTATCCAAATCCATAAAATTTGGAT<br/> TTCAAATTTTATACTGTATCTTTTAAATATGTTTCAATTCCTTTGTAGAATAAGATGAAAAGGATAAAATCC<br/> ACCTAAACTCATCCTATTATCATTATGATTATACTTAAATGAGTAAAAATAGTTTAAACTTAATTTATTT<br/> GAGTAATATTATATTTTTTAAAAATTTTAACTGTAATATATATTTATATATATATATATATATATATATATAT<br/> GAATCAATACTTTGTTCATCTAAGTAAACAAATAAGGAATCTTTCTGTACCTTCAAAATCTAGTAGTA<br/> ATATTTTATACTTTGATCTCCACATCCAAATTTATGGTCTCGTTGTTCTTGTAAATCAACAATTGAAAAGT<br/> TCTTGTATACTCCGCTTCAAAGTCAATGCCCCCTCCCTCTGCACCTGATTTTGTCAAGGAAAACTCGTA<br/> GAAAACACCATATACCATACTCCAAACCATCAATGCTTGGTTAATTACCCCTACAAATACCCATAAAAAAT<br/> TAATGTTACCATATTAATTTCAATTTTCATCAATCACCTACCTTCTCTATTTCTTACAATCAATCAT<br/> CACACC</p> |
| CrLEA2-35 | <p>CAATTCCTCTTCACAATTTTATTCCCATCTAAAAATGATATAAAAACTGTTAATGAAAAAATCTCATAAA<br/> ATATGTTCCATAAATTAATAATCACTTAAAGATATTTTGAAGGATTTTGAAGTTTAGCATGAAAAATCA<br/> ACAAAAAAGTAAGAAATGTAGACATATAATGGTGTGGGTATAAAATCTGCTTAAGCAAACTAGTAAATA<br/> TGACTTAAGTCAAATATTAAATTCATTCTATACCTCTCTATACAAAATAAGATCTAAAAAATATGACAAAAC<br/> TATTCCAAATTACGATAGCTATTGAGATATCTCTGTGAAAAATACACAAATTTTAAATTTATGTACTCTC<br/> CAATCTACCTTGAACATGACATGAATTTGAGGTTGAAGATTTGTGATAAAACAACCTTAAATGTCAGCTAA<br/> GAGAAATTACAATCACTCACTATCTCTAAATATAATAGAAAAATAAATAAATAAATAAATAAATAAATAAATA<br/> GACAAAAAGATAACAATAGTATTCACAAAAGAAAACAATAAAGTAAAAATACGTTTTTGAAACATGAATA<br/> AAATCATATGAAGCAAAACAAAAATAAAAACTAACCTAAGTTCTTTATTCCTATTTCCCTAGCTAATAAAC<br/> AAATCATCTGAATTATAGTTTATAAAAAACAAATTTATGATATAATTTTTTCAATAATACTTTTATGACA<br/> TTAATTTTTTAATTATCTTTGATCATATCAATATCATCTCATTATTTCTTTTATTTATATATAAATCAATTTA<br/> CAAATTTATACGAGATTACGCGGAGCCTGTAAGATAGGACAGAGTTCCATTCTCCCCAAGAAAAATTTAA<br/> ATTATGGGTCCCACGGTCCCACGTAACGGCAATTAAAAAATGGTGACACATAAGGGTAGGCATTAAATTAAG<br/> AGTAAAGAAAAGTCGTAATTAATTAATTAATTAATTAGGAAATGTTAAGTTAAGCAAGGATTATTATTAGT<br/> TTGATT</p>                                                                                                                                                                                                                                                                                                                                                                                                                                                                                                                                                                                                                                                                                                                                                                                                                                                                                                                                                                                                                                                                                                                                                                                                                                                                                                                                                                                                                                                                                                                                                                                                                                                                                                                                                                                                                                                                                                                                 |
| CrLEA2-36 | <p>TCCATCCTTTTGAATGGCACTCTTAAAAAATAAAATCAGAAGTATATATGGATGTTGGATGTATAAAATAT<br/> TGGTGTCCAATATTTAATCTTAGATGAAATATTTTAAAAATTTTGAATATTTTAAAAATTTAAATATTTT<br/> TATAAAAAATTTTAAATTAATAAAGAATTTAATTTTTTCTATTTTATAAAATTTTATATTAATGATAGA<br/> TTTTAAATTTATTAATTTTAAATTTGTTATTTATATAAAATAAATTAATTTTATTATATACAAATTTTATTT<br/> TTAAATATTTTAAATTTTAAATTTTATTAATAAATTTATATATATAAATAAATTTTACAACATATTTAAATAAA<br/> TAATAGTCTAATAATTATACAAAATAAGTGGGAGATTAGATTGCAATGAACTTCCATTAAAAGTATTATA<br/> TTGAGAATCAAGATGAAAAATAAGAGATGAAAAAGAAAGCACTTAAAAATATAATAAATAAATAAATAAAGGA<br/> AAAAATCAAAAAAGAGAGTTGCATTTATGAAAAATGAGCCTTAAAAATTTGAAAAATTTTAAATTTATCTT<br/> ATTTTAGGCAAAATTTAAATTTGTTTCAATTTAATTTATTTATATCTACTTTCTTAAAAATATCAAGAATATGAT<br/> TTTTTTTTAAATATGCAAAACAAATATTGTAATATCTAAATTTTAAATTTCTATTAATAAATTTGTTATTTTTTC<br/> TTAAGATGACTTACCTAAACATATAAGTTAAAGAAATATAGTACAAGTTCTAAAAATTTGTTATCATTCCTT<br/> TCCCATTGGCGGCCCATAAAAATAACATCTGTACAAGAATTATCTTATCAACATACATCAAGGGTACTCTC<br/> ACAAATAACTATTTGAAGGTTTCGATAACTTTTTAATTTTTTTTCAAATTTTAAAAAGTATTTTATGTAAT<br/> TTAATTTCTCTGAACGACATCGTATTTATTTATAAGTATGAAGTGTCTGTAACCGTACACAAGTTCTTCAA<br/> GCTACA</p>                                                                                                                                                                                                                                                                                                                                                                                                                                                                                                                                                                                                                                                                                                                                                                                                                                                                                                                                                                                                                                                                                                                                                                                                                                                                                                                                                                                                                                                                                                                                                                                                                                                                                                                                                                                                                                                                                                                   |
| CrLEA2-37 | <p>TATTAAGCTTTGTAGGATGATTTTTAATTTTTAATTTTAAATTTTGTG<br/> TAAAACTTGAATTGTAATTTAAATTTTAAATTTTAAATTTTAAATTTTAAATTTTAAATTTTAAATTTTAAATTTT<br/> ATTATAAATTTATTAATAAATAAATAAATTAATAAATGAAATAAAAAATAAATAATATTATTATTATTAATAA<br/> TAATGATTATGATAATTATAATAGTTGTGACATCAATAAAAAATAAAAAATAATGATAGTAGGATAAAAAAC<br/> GGGAATAATAGTTAAATTAATAAATAAATAAATTAACATTATGATTATAAATAATGAATACATAATTAATTAGA</p>                                                                                                                                                                                                                                                                                                                                                                                                                                                                                                                                                                                                                                                                                                                                                                                                                                                                                                                                                                                                                                                                                                                                                                                                                                                                                                                                                                                                                                                                                                                                                                                                                                                                                                                                                                                                                                                                                                                                                                                                                                                                                                                                                                                                                                                                                                                                                                                                                                                                                                                                                                                                                                                                           |
| CrLEA2-38 | <p>GGGAATAATAGTTAAATTAATAAATAAATAAATTAACATTATGATTATAAATAATGAATACATAATTAATTAGA</p>                                                                                                                                                                                                                                                                                                                                                                                                                                                                                                                                                                                                                                                                                                                                                                                                                                                                                                                                                                                                                                                                                                                                                                                                                                                                                                                                                                                                                                                                                                                                                                                                                                                                                                                                                                                                                                                                                                                                                                                                                                                                                                                                                                                                                                                                                                                                                                                                                                                                                                                                                                                                                                                                                                                                                                                                                                                                                                                                                                                |

[illegible]



|           |                                                                                                                                                                                                                                                                                                                                                                                                                                                                                                                                                                                                                                                                                                                                                                                                                                                                                                                                                                                                                                                                                                                                                                                                                                                                                                                                                                                                                                                                                                                                                                                                                                                                                                                                                                                                                                                                                                                                                                                                                                                                                                                                                                                                                                                                                                                                                                                                                                                                                                                                                                                                                                                                                                                                                                                                                                                  |
|-----------|--------------------------------------------------------------------------------------------------------------------------------------------------------------------------------------------------------------------------------------------------------------------------------------------------------------------------------------------------------------------------------------------------------------------------------------------------------------------------------------------------------------------------------------------------------------------------------------------------------------------------------------------------------------------------------------------------------------------------------------------------------------------------------------------------------------------------------------------------------------------------------------------------------------------------------------------------------------------------------------------------------------------------------------------------------------------------------------------------------------------------------------------------------------------------------------------------------------------------------------------------------------------------------------------------------------------------------------------------------------------------------------------------------------------------------------------------------------------------------------------------------------------------------------------------------------------------------------------------------------------------------------------------------------------------------------------------------------------------------------------------------------------------------------------------------------------------------------------------------------------------------------------------------------------------------------------------------------------------------------------------------------------------------------------------------------------------------------------------------------------------------------------------------------------------------------------------------------------------------------------------------------------------------------------------------------------------------------------------------------------------------------------------------------------------------------------------------------------------------------------------------------------------------------------------------------------------------------------------------------------------------------------------------------------------------------------------------------------------------------------------------------------------------------------------------------------------------------------------|
| CrLEA2-44 | AAATATATAGAATGAATTTATGTTGTATTTAATGCATATTATTATAAATATGTATATATAATCATAGAATTT<br>TATTGATTTTACATTATTAATAATATAGTATCATTTGTGATTTATTTAATTATAATTATTATAATATGTA<br>ATTATATCTAATATAAATATTGAATTAATTATAAATTATTATAAATATAATTATATAAGATGGTATTACAA<br>TATATAATAAATTTTATGTTATTTTTCAGCATAAAAAATATTATAAATATATTAAACATTTAATTTTTTTCT<br>ACCATACATAAATAATAAACAATGTAAGCCTTTACTCCAAGTGTTCAAACGTATCTCTTATGAATCAAAA<br>AATTTAAGAATAATATTGACTATTTATGAATAATTATATCATAAAAATTAATTATTTTCATCGTTTATAAT<br>AACAAATTTCTTTCACCTGATATACCTCTTATCTATATATATATATATATATATATATATTTCAGSTTA<br>CAATGATTTGCTTCACGAACATTTATCACACATATATCTCAAAAAATTTGTAGGTTGATTTACCCAAAAATCA<br>TAAACC<br>ACAAATTAATAATTTACAGTAAGTATGATTTTTAAAAATATTATTATAAAAAATTAACAACCTTTTAATAATATG<br>AAAATTTTTTATTGGATGAGAATTTAAATTTTTTACCAATATCATTTGGATTCCCAATTAATCTATTATAT<br>ATTATATTAGATGAAATTAATTTATTTTAAAAATAAATTTATGTTAGAAATACCTTTATTTCGATAAATTTTTA<br>AAATATATGAATTTAAAAATTTTAAATTACTAAATAACAAATTTTATTATATAAAATAAAATTTATAAAATC<br>ATTTAGTATTTTATTAATAATTTTAAATTTAATGTATGATATTTTATTTAAATTAATAAATAACGACCATA<br>AAATTATATACCTATAATTTATTATATTTTTTAAAAATTTAATATACTTGATTAGTATATTAATATTAAAT<br>TATTTCAATGATTAAACATTTAACTTTTACATTTTACACAAAAATAAAATAAAATCCAGATGAATTTGCTCT<br>TGCTTATCCATAATACACTCCTAAAATAATCTTATCACGTCCATGTATTTTTATATATTCTTATATTTTTAT<br>AATTAATCTATAATTATATATAGCCGTAATTTTCATCATTTTAAACAGTTTATAAAGTAACTGCCAAATTA<br>ATGTAACCTTGATGACCCATAATACAGCATTTTCATTTGTTTCATGCGTTGTGTTCTAAATTAGGAGTCAACTG<br>CGGTACCGTTATTGACTAGTATTCAGAAATTTTCAAAATTCGACAAATCCCAAGTATCCCAATTTTACAA<br>ATATCAAAATTCACGCAGTCACATGAGGAATGCAAAATCGGACAGAATCACAATTTCCGAGTATATATCA<br>GCGCTAATTTATTTCTTTCCATCCAGAAATTAAGTCTTGAATCGACAAAGATATAACATTTATCCATACCTTA<br>TATCAAAATTTAATTAGTTGATTTTCCCAATTAATCTCCATTTACTTTTATTCCTGAAATAGCCAGAACCA<br>GAAACC<br>CCAAACAGAGCCTTTTATATTATTATTATTATTATAACAGAACTTGGAAGTTTATCTCAGTATACTAGGA<br>AAGGAAGTGAGAATCAAAATATACGATAAATTTCAAGTATAGTATTTTAGTGTTTGAATATATTGTGCAT<br>AGTAATTTGGTCTTATTTTTATCTATTTAAAGAAAGAAGATAAACATTACTTTTGTATTCTATTTATAT<br>AAAGTTTAAAGATAATACTAATTTTATTTTATTTTTCATTAATATTATTTTATTTATGCCCCAAAATAAATAAGA<br>GAAAAAAGTAAAAATAGAACAAATCAAATAAATAAAGAATAAATTAATAAATTTGTTCAATAATTTAAATTA<br>AATAATTGATTTTTTTTTTGCATAATTATTTCTCTTTAAATAAATAAGAAGAGAGGTAGCATTTCAATTA<br>AATTAAGATTTTACTTTAAGAAAAATTTAACTAATATCATTTAAAGCATTTTATTAATAAGTTAAAGTAGA<br>AAATTTTTGTTAAAAAATTAACACATTATTAATACACAACCACTATTATTAGTAATACCTCTAATATTATTT<br>TTCAATAAATCTTTCTATTTTGACCTCAACAACATTAGTTAAGAGTACCCTTGCTTTAATAATTAAGTTC<br>AGGCATTAACTAGGCTTTATTACATGAGTTATGAAAGAAAAAGCTCGAATTTAAGTAAAGAGCAACA<br>GCAAAACAGGAAGATTAGAGCTAAGTTTTGTTGGTTAAATATAAGTATAAACAATAATTTGAAATGGAGGCA<br>ACTTCCCGTACACTCAAGCGTGGCTAGACACAGATCAGAAAAACGAAGTAAGTATGATGGTGTGATTGGGAA<br>AATAAAGCATTACATTTTCTCATGGCTATATAATGCATATCACATACAGCATTTGTTAAGTAAGAAACAT<br>TCTCCAAATTTGGTGAATCCATTACACGCAAGCAACACTGCTTTGCATTCATATATTCACCATATAACAAT<br>TAACCA |
| CrLEA2-45 | CACCTAAACTTCATAAAATATTTGCAATTTGCTCATTCAACTCTCTTCTCATATATAACCATGTTTGGTT<br>TTGTTCTTTATTTTTTGGTTTAGTGTTTAGGTAATTTTTAAGTTGTTGCATTTTTTAATCTTTGGTTGAA<br>ATTTAAAAATAATATAATGTGAGGTAACCTCAAAGTGAGTTTAAATTGACAAGTATTACGGAAGAATACTCA<br>CTCTTCTACCTGTACTCAGTACTCACTGGTCAATTGATAAGGAATATGGGGATACAACCTCATATACCCTCC<br>TAGAGGCAAAATTTCAATGGAATTTTATCTTTTTAAAAATCCGCTAATAATAAGTATATAAATTAGGAAAA<br>TACCTAGATCATTTATCAATCAATTAAGAAAAATGATAAAATTTGGAATTAATGTTAAATTCATAATAA<br>AATTATTAGCAATTTAATGCTTGAACCTAATACCTTTGTTTAGATAAAAAATTAATAAATAGATAACAAT<br>TATTTATTTTTTGTCTTTTAAATGAAAAAGTAATTTTTTAGAGGTAAATTTTATTTTAAATTTTTCTTT<br>CTTTCTTTCAACCAATCAAAATTTAAGAAATGTTGCTTTAATAAGTCTTTACGGAAAAAGCAAAAGTTG<br>CTTTATTTTGTAAATCTCAATAAAAAAGCTTGAATGGACAAAACATAGATTAGATTTTATAAATCTTTT<br>ACTGTTATCTTTAATTAATGAAGCTGTATCTATTAATGACATTCATTTTTTAAAGCATAACCTTATTT<br>TAATTAATAAATCTATAAGATTTGACCAATTAATTTTGTGGAATTTAATTTGGTGAAAGAAAACATACTG<br>AGCTTAAAGTCAATAAGAAATTAAGGAGACGAAGAATTTAAGAGTGAGGAGCATTTGCAATTTGTGACCG<br>GCGGAACGTGAGAGGTTAGAGCTGGATACAGCTAAAAGTTGTAGTTAGAATGTTGCCATCTCTCCCCCTT<br>CTTAGT                                                                                                                                                                                                                                                                                                                                                                                                                                                                                                                                                                                                                                                                                                                                                                                                                                                                                                                                                                                                                                                                                                                                                                                                                                                                                                                                                                                                                                                                                                                                                                                                                                                                                                                                                                |
| CrLEA2-46 | TTATGTATAATTTAAAGAAATATGTTATGTTATATTTTTATATAAATTAACAAAGTTTATGTAGGATTAA<br>AAAAGATAGATATTTTATATGTAATTTTTGTTTAAATTAAGAATGGATGAATGGTTAGTGAATTTTTTAA<br>TAAAAATTTATAATTTATATTGCAATTTAAGGATTTAAGGATTTTAAAAAATAATCAACTTACATCTAC<br>ATTTGATGTAATCCACTCTAAGCTGTAAGAGGAATTTTTTCCTTAAAAAATACTCTTTTAAATCTCTAT<br>CTATTTTTTTTATCGGTCTAGAAAGAAAAATATAGAAATATTAATAAATCAATTAATATTATTAATTTTT<br>AAAAAATTTATTTATTTTTTAAATTTATCTATTTATATATAAACCCTTTTTTTACTGTTGATGGATATAAAAA<br>TATATATATAATAATAATAATGAATATTTTCTTAAAACTAGAATACACAGAAAAATGAACAATTTTTTT<br>TTGTACTTTTTTTCTATAAAAAATGAAAAGGAACGGAGGAGAAATATATTAACATTTAATTAGAAAAACAAG<br>GAAAAAGTAGACAGAAATGAGTCGAGAAATTTTATTTTACATTTTACATTTCAAACGTGAACCAATCTCT<br>GTCAATTTGGCTAAACAAGTAACAATTCAGGATTTTAAATTCCTGGGTTGTGTTTACCCTTTTGTACTAT<br>CTTCTTTGATTAGCAACTAGGCTGCGTCTATCATCCATAATCTACATTAATCCAACGAACTAAACGTCAC<br>GAATAAATATAAAGCTACCTAAAATGATACCAATAAATAACACATTGAAGCATAGACAAACACAAGAGG<br>ACCCATAATATAATTAGATCAATTTGCCAATCTCTATAATTAAGGTTTCAAGAATTTATCTCTGGAAGTG<br>CTCATGTCCCAACAAAGAAAAAGGACAAACATAATAAATGTTATTTCTTTTATTTGAATACTTTTACATAAC<br>AAATAT                                                                                                                                                                                                                                                                                                                                                                                                                                                                                                                                                                                                                                                                                                                                                                                                                                                                                                                                                                                                                                                                                                                                                                                                                                                                                                                                                                                                                                                                                                                                                                                                                                                                                                                                                            |
| CrLEA2-47 | TTCTCTGCAATTTAGAAATTTATGTGTTATTTTGTAAATACATTTAACCTGGTTTTATTATGTAAACA<br>TTAAATAATAATAGTTAAATTAATATATGATGACAGATGTCTGCACGTTATTGGTTTTTGGGTGAAGGGGT<br>ACCAACCCCGTTATTTTCAGGGTACCGGAGAAACCAACCTTTTGAATCGATACATATAATGATTAA<br>AAGTGAATTTGGTACTGTTTCTCATAAAAATTAATGGCTTTTGAATAATAAAAAACAATAAGTATTTAACTAT<br>AATGTATTTAAAAAGTAAAAAATATTTACGATTTTTTGGGTGAAGGGGTACCAACCCCGTTATTTTCAGG<br>GGTACCGGAGAAACCAACCTTTTGAATCGATCATATATAATAATTAATAAAGTGAATGATCTGTTCTCT<br>ATAAAAATTAATGGCTTTTGAATAATAAAAAACAATAAGTATTTAACTATAATTTGATTTTGAAGGTGTA                                                                                                                                                                                                                                                                                                                                                                                                                                                                                                                                                                                                                                                                                                                                                                                                                                                                                                                                                                                                                                                                                                                                                                                                                                                                                                                                                                                                                                                                                                                                                                                                                                                                                                                                                                                                                                                                                                                                                                                                                                                                                                                                                                                                                                                                                                                  |
| CrLEA2-48 |                                                                                                                                                                                                                                                                                                                                                                                                                                                                                                                                                                                                                                                                                                                                                                                                                                                                                                                                                                                                                                                                                                                                                                                                                                                                                                                                                                                                                                                                                                                                                                                                                                                                                                                                                                                                                                                                                                                                                                                                                                                                                                                                                                                                                                                                                                                                                                                                                                                                                                                                                                                                                                                                                                                                                                                                                                                  |

|           |                                                                                                                                                                                                                                                                                                                                                                                                                                                                                                                                                                                                                                                                                                                                                                                                                                                                                                                                                                                                                                                                                                                                                                                                                                                                                                                                                                                                                                                                                                                                                                                                                                                                                                                                                                                                                                                                                                                                                                                                                                                                                                                                                                                                                                                                                                                                                                                                                                                                                                                                                                                                                                                                                                                                                                                                                                                                                                                                                                                                                                                                                                                                                                                                                                                                                                                                                                                                                                                                                                                                                                                                                                                                                                                                                                                                                                                                                                                                                                                                                                                                                                                                                                                                                                                                                                                                                                                                                                                                                                                                                                                                                                                                                                                                                                                                                                                                                                                                                                                                                                                                                                                                                                                                                                                                                                                                                                                                                                                                                                                                                                                                                                             |
|-----------|---------------------------------------------------------------------------------------------------------------------------------------------------------------------------------------------------------------------------------------------------------------------------------------------------------------------------------------------------------------------------------------------------------------------------------------------------------------------------------------------------------------------------------------------------------------------------------------------------------------------------------------------------------------------------------------------------------------------------------------------------------------------------------------------------------------------------------------------------------------------------------------------------------------------------------------------------------------------------------------------------------------------------------------------------------------------------------------------------------------------------------------------------------------------------------------------------------------------------------------------------------------------------------------------------------------------------------------------------------------------------------------------------------------------------------------------------------------------------------------------------------------------------------------------------------------------------------------------------------------------------------------------------------------------------------------------------------------------------------------------------------------------------------------------------------------------------------------------------------------------------------------------------------------------------------------------------------------------------------------------------------------------------------------------------------------------------------------------------------------------------------------------------------------------------------------------------------------------------------------------------------------------------------------------------------------------------------------------------------------------------------------------------------------------------------------------------------------------------------------------------------------------------------------------------------------------------------------------------------------------------------------------------------------------------------------------------------------------------------------------------------------------------------------------------------------------------------------------------------------------------------------------------------------------------------------------------------------------------------------------------------------------------------------------------------------------------------------------------------------------------------------------------------------------------------------------------------------------------------------------------------------------------------------------------------------------------------------------------------------------------------------------------------------------------------------------------------------------------------------------------------------------------------------------------------------------------------------------------------------------------------------------------------------------------------------------------------------------------------------------------------------------------------------------------------------------------------------------------------------------------------------------------------------------------------------------------------------------------------------------------------------------------------------------------------------------------------------------------------------------------------------------------------------------------------------------------------------------------------------------------------------------------------------------------------------------------------------------------------------------------------------------------------------------------------------------------------------------------------------------------------------------------------------------------------------------------------------------------------------------------------------------------------------------------------------------------------------------------------------------------------------------------------------------------------------------------------------------------------------------------------------------------------------------------------------------------------------------------------------------------------------------------------------------------------------------------------------------------------------------------------------------------------------------------------------------------------------------------------------------------------------------------------------------------------------------------------------------------------------------------------------------------------------------------------------------------------------------------------------------------------------------------------------------------------------------------------------------------------------------------------------------|
| CrLEA2-49 | <p>AATTTATGATTTTCTATGAATATAGTTATTTTAGAATTTTACATAAATAATAAAATGCATTTCATCTTT<br/>TATTTTTAATAATTTTGTGTTGAATCATTAATGAATAATATTAATAATAAATAAACAACAGAAATAGG<br/>TAATATTTTATCATAAATAAAATATTTGAATTTTGTGCTTTGTTAATCTGTGCAAAATAAAAATACA<br/>GGAGTACAAACAAAATAAATATTTATAATTTTACGACACTCAAAAGAACTCTGCTTTAGAAAGATAAAAA<br/>AGCGTGAAAGATTTTGATGTCTCTATCGCATTAATTATGCTGTCTCTGTCTCAGACGCATTATTATTATTA<br/>TTATTTCTCTTTTGTTCAGAAATTTATTTACAAATACAATATTTTCAGTCTATTTGTAACCTGAACTTGAA<br/>GCATAAGAAAAGTTGATGATTCGGCAATTAATTTTGAACAAAGGAATAAGTGGAAGAGAAACAGAAGGA<br/>AGTTGC</p> <p>ATCCTTCTTCTTTACATTACTTATATCTCATTGTAATCACAATTGAGATTTTGATATTTTCTTGGGCCAA<br/>GTCCTCCCTCTCTCAAAATCCTCCACATCTAGTACATGATCTCCATTCTCCATCATCAATATTCTTATTTT<br/>CTCATAAACTGCTGTCCACCACATCTATCTTCAACAGTGCCCTCCCTGCAAGTAATAATGTTTGCACAAA<br/>CGCTTGAGGACCATGGAAGCGAGGCCAACCAATGCTTGTCTTATTAAGATTTTATCATTTCAA<br/>ATTTAATAAATGGCATACTAGTTGATTGATAATGTGGTTATAGAGATCTCTCCTCTCTTCCCATCTTCATA<br/>CACTCTACCACAAATAGATTCTTTTAATGTTAAACTTTTAGGATTTCTGAATAGGAATGGAATGCTTCATGG<br/>AATCTACAATTACATAAAAAGGTTACAAAGTCATTTTGCCTTAAGTTAGTTAGGATATTTGCTTTGTGTCG<br/>GGTTCACATAGAATGGGATCATGGCACACGAGAAACTGTCGCTTTGTAGGCACTTAATTTCCATTTT<br/>AAAACTTTTATTTATTTATTTATCTGCGTTTGGACACATTAATTATATCAAGCAGATGACCCCTATTTTAT<br/>TTTCACTCGGCTCTTGGGATCATGTATTTCAAGATTTTATTATCCCCTGGTACAGGACAAGAATGTTTTT<br/>TTTTAATAACGTGGTTCATCGTAATCCAATGTATGTTAGCAACACAGGAATAAGATGGAATGATCCATG<br/>AAATTTTCAGCACTGAGACCGCAATTACTGAGGGTAGGGTATGGTGAAGCTCAAGAAATGCATATATTT<br/>CCTCCCCTCATTGATACTTTGGCAACAAACAGCTATTTACATATTTCTCATGTTGCCATCTTTAAATAC<br/>AATGATTTGCTGCACCATTTCATCACTTCATAATGAAATTAAGCGAGCTCTAAAAATCAGACAAATTTTGT<br/>TAAAGG</p> <p>AACAGTTAAGGATGTTGGGCCTTAATTAAGATTGTTAAGAATATCCTTGTCTTTGGAGTTCTGAGATCAGA<br/>GTTTGAATCCTGGGGTTAATAAGAGTAAGGTCAACTTTAAATTGCAAAATCGAAGTAGTCTACAGAAGGG<br/>AAGGGGGTTCAACACATGGTTCTCTTAGCCAGAGACATGTCACATGCCATTTGCCACATGGTGAAATATAC<br/>TAACAAATGAAGTAAGAGGCCCAATTAATCTTCTAAATTTCTGTTGACCATCATCCACATGCTTAAAGTGAC<br/>CATCATCCACATATATATATCACAGGCCCTGCTTATTTAATTATGACACGTTCCCTTTTCTTTATGTTGTG<br/>GATCTATCAGCTGACTATTATGTAACTTATCAAAATCCTAATGGTCGCCATTTCATTTGGCTTGGCGGTTT<br/>GCCAGCACAAACACTACACTTCCACAAATCTATTTGAATCTGCCTTTTATAATATTTTTCATTTTGTAAA<br/>CATCAATTTATATAATTAATATTTGAACCTTATAAATTTTAAATTTTATTTCTCATTAATTTATCATAGT<br/>TTTTTAAATTTATTTAGATTTTATCAACTAATTTTATTAACATTTTATTTAGTTAAATTTAATGGATCA<br/>TCTTTAAATTTAATACTAACCTCTGATTATCTTATTTCTAATTTTATCAACAAAGTATTAAGTTTTATG<br/>TGTATGGCAAAAAGCTCGTAGAAAAAGGAAATCGTGTAACCTGCATAAACAAGAGCCGGACTATGAAAGCC<br/>AAATGCCCCAAGCCGCTAGTTTCATGTTTTTCATCCCCAATACTAACTAAATCAATAATCTGATCAAAAC<br/>AGACAGTCACAAACGTATAGTTACAGCTATTTCTATGTTAGTATAAGTTAGCTAGCTATGATATATAGTC<br/>CCTATATCATACACATTAATTAGATAGTTTGTAAATTTCTACATTACCCGTATGTGAAAGTCGTATGGCA<br/>TGTGGA</p> <p>TATTACAATTTACAGACAGGAAAAAAACCCCAAGTAATAGGAACCTGAGTTTGTGTTGATTGGGAGAAAG<br/>GAGAAATATGAAAAGAAAGAAATATTTGTGCATAAAAATAGAAAAGAAAAATCAACTTTTACAAATTTTCATC<br/>ATTTTTTTTTTAAATTTGATGAAAAATGAAATAAGCTTTTATTTTTTATTTTAAATTTATGAAATTTATTAT<br/>ATATATTTAGGATTTAGGGTTTAAAAATGAAATTTTATACTATTAATATATATTTTCTTTTTTATTCAT<br/>TTAAAAATTTCTTTTTATTTTAAACCGTTCAATCAACTATTTTTTGGTTTTTATTTTTTATTTTTCTTAC<br/>TGCGCAAAAGTGTCCCAACCCATATTGAATGCTAAGTTTCCGTGCTAAATAACATCTCGGCAACCGACACA<br/>ACTACCTATTCTTAAATATGAAAAATTTCTACCTTTTAAACATCACAACCTTAGCTATATCAACCTTTTT<br/>TCGAACTCAGTGTTTCCGTGGAAAAACCTTTTTTCAGTGAAAAATACTGCATTTGATTAGAATAAGTAATTT<br/>TTGTAACACATAAACTGAGGTACACATTTATACATTTTAAAAAGTTAAGATGAAAAATTTCTCATGTTGAA<br/>AGATGATGACCAACAGAAATTTAAATTTTCAACCGCTAGACTGCCTAGTGACAGAACAGTGGAGTTTGTG<br/>GCACATGGTAGTGGAGAAATTAAGAAAAGGAAAGGGTTCAGTGGAAGACAAAAAATACAGGTAACACAGA<br/>ATTGGATTGAAGGGAAGAAAACAGGTCCAATGGTCCCTACCCATCTCTTCACGCTCTGCAAAATGCTTTCT<br/>TTTGTTCACACGCACTCCATGTGCTCGTGATTTTGCTTTGCCACATTTCTCCATCACATCACATCACAT<br/>GCCTCAACATAACAAACATTGCGTTCTCTTTCTTACATTACAGTAATAGTTCCCTCTCTATTCCAATCCAT<br/>CAAGCC</p> <p>TTAACTTTTAAATTTATTTATCTTTATAACATATTTAAAAATTAGTCCTAAAAGAAAACAATAGTTTAACTG<br/>GACAAAATCTTGTGTCATCCGATCGCCGTAAACATCTCATGCCATTTGTTATTACCAAGAATATTTCGATTT<br/>TAACCTTGATTATTTTCATATTTTATTAATTTTATTAATTTTATAGGAAGAAATTTTATTTTACCTTTATTTA<br/>GCATTTTATCTCATTTTGACAAAAGTGTAAGGAATACGCAAAAACAAAATGTTATTTTAAAGAGAAAAGTGA<br/>ATGAAAAGCAGGGGTGTTAATTTTTTTCGGAGTTAGTTTTTACCTCGATTTCCGATGTATGTAAACCAAA<br/>AATAAGTGACATGAAAATATCGTAGTTTATATGAATAAGACTATTTTACATCGGTAAGCAATGTATAAA<br/>TCCACCGGAAGTGGAGAGAGAAATAAAGAAATAATAATAAGTTCCCGGGTGATGTAACGAAAAATAAAAAAT<br/>AAAAATAAAGGTGAATGTAAAGATATGAGTAAGAAAATATTAAGTTTCAAGTACATAAAATTTTGAATTT<br/>TTTATATTTTCAACAAATATATATCTTATTTTTATTTTTTTTTCTTTCTATTATATTATCAAAATTTTTAA<br/>TTATTTATATATATATATATATTAATATTATCATCATTTTATTTAAATATTTTATTTTATCTTTTTAATCA<br/>TATCACAATAATTTATTTATGTGTAATTTTTTCTTATTTTATTTTATTTTACCATCCCTCATATAAAAA<br/>ATGCAAAAGATATCTTATTCATATTACAAATTTTATACTACAATTTATATAATAACTCTCTTTATTTTTTTT<br/>CTATCACAGTACGTACTATATTTTCACTTTTTCTATCTTTGTATATTGGTTGTTGTATAAATTTTGTA<br/>GGAAAAATTATGATTTGTCTAATTAATAATATGTATATAAATAGGACGAAACCGCGGTGCGTTTCCATCAGA<br/>CTTCAT</p> <p>AATTTTTTTTCTTTTAGATATTTTATTTTCTGAATCACTTATTATAGTTTCAATAGATTAAATTAATAAAA<br/>TAATTATAATCAAAATATTTTATAAAATATCAAAATTTTTTAAACATGATTAAATTAATTTGAGTTAATAC<br/>TAAAAATCATAAATAAAAATTTTAAAAATAAAATATCTAAACCAAAGGCTATTTGAGAAAAAAAATTA<br/>AATTTAATTTATTTAAAAATTTATAGATATATTTAACCCTAATTTATTTTACTGATAAAGAAAAGAGATA<br/>TACAATTTGAGAGAGTGGTATTGATATTTTCTACTGATGTAGTTTGTGACAATCATATTTGAAATTTATTA<br/>CTGAAAAATAAATATATTTAATATCTTATAAATGTAAAGAGTATTCATTTATTTTATTTATTTAATAAAAA<br/>AATAATAATAAGATCACCTTTGTAATTTGAGGCTGTAAGATGATTCGGAATTTATTTCTTTTAAATAACAAC<br/>AGTCATACAGCAATTTCTGTCCAATACTGTATGTCGGGAACCATTTCCAAATGATAACAAGCCGGTGCAGTG</p> |
| CrLEA2-50 |                                                                                                                                                                                                                                                                                                                                                                                                                                                                                                                                                                                                                                                                                                                                                                                                                                                                                                                                                                                                                                                                                                                                                                                                                                                                                                                                                                                                                                                                                                                                                                                                                                                                                                                                                                                                                                                                                                                                                                                                                                                                                                                                                                                                                                                                                                                                                                                                                                                                                                                                                                                                                                                                                                                                                                                                                                                                                                                                                                                                                                                                                                                                                                                                                                                                                                                                                                                                                                                                                                                                                                                                                                                                                                                                                                                                                                                                                                                                                                                                                                                                                                                                                                                                                                                                                                                                                                                                                                                                                                                                                                                                                                                                                                                                                                                                                                                                                                                                                                                                                                                                                                                                                                                                                                                                                                                                                                                                                                                                                                                                                                                                                                             |
| CrLEA2-51 |                                                                                                                                                                                                                                                                                                                                                                                                                                                                                                                                                                                                                                                                                                                                                                                                                                                                                                                                                                                                                                                                                                                                                                                                                                                                                                                                                                                                                                                                                                                                                                                                                                                                                                                                                                                                                                                                                                                                                                                                                                                                                                                                                                                                                                                                                                                                                                                                                                                                                                                                                                                                                                                                                                                                                                                                                                                                                                                                                                                                                                                                                                                                                                                                                                                                                                                                                                                                                                                                                                                                                                                                                                                                                                                                                                                                                                                                                                                                                                                                                                                                                                                                                                                                                                                                                                                                                                                                                                                                                                                                                                                                                                                                                                                                                                                                                                                                                                                                                                                                                                                                                                                                                                                                                                                                                                                                                                                                                                                                                                                                                                                                                                             |
| CrLEA2-52 |                                                                                                                                                                                                                                                                                                                                                                                                                                                                                                                                                                                                                                                                                                                                                                                                                                                                                                                                                                                                                                                                                                                                                                                                                                                                                                                                                                                                                                                                                                                                                                                                                                                                                                                                                                                                                                                                                                                                                                                                                                                                                                                                                                                                                                                                                                                                                                                                                                                                                                                                                                                                                                                                                                                                                                                                                                                                                                                                                                                                                                                                                                                                                                                                                                                                                                                                                                                                                                                                                                                                                                                                                                                                                                                                                                                                                                                                                                                                                                                                                                                                                                                                                                                                                                                                                                                                                                                                                                                                                                                                                                                                                                                                                                                                                                                                                                                                                                                                                                                                                                                                                                                                                                                                                                                                                                                                                                                                                                                                                                                                                                                                                                             |
| CrLEA2-53 |                                                                                                                                                                                                                                                                                                                                                                                                                                                                                                                                                                                                                                                                                                                                                                                                                                                                                                                                                                                                                                                                                                                                                                                                                                                                                                                                                                                                                                                                                                                                                                                                                                                                                                                                                                                                                                                                                                                                                                                                                                                                                                                                                                                                                                                                                                                                                                                                                                                                                                                                                                                                                                                                                                                                                                                                                                                                                                                                                                                                                                                                                                                                                                                                                                                                                                                                                                                                                                                                                                                                                                                                                                                                                                                                                                                                                                                                                                                                                                                                                                                                                                                                                                                                                                                                                                                                                                                                                                                                                                                                                                                                                                                                                                                                                                                                                                                                                                                                                                                                                                                                                                                                                                                                                                                                                                                                                                                                                                                                                                                                                                                                                                             |

|           |                                                                                                                                                                                                                                                                                                                                                                                                                                                                                                                                                                                                                                                                                                                                                                                                                                                                                                                                                                                                                                                                                                                                                                                                                                                                                                                                                                                                                                                                                                                                                                                                                                                                                                                                                                                                                                                                                                                                                                                                                                                                                                                                                                                                                                                                                                                                                                                                                                                                                                                                                                                                                      |
|-----------|----------------------------------------------------------------------------------------------------------------------------------------------------------------------------------------------------------------------------------------------------------------------------------------------------------------------------------------------------------------------------------------------------------------------------------------------------------------------------------------------------------------------------------------------------------------------------------------------------------------------------------------------------------------------------------------------------------------------------------------------------------------------------------------------------------------------------------------------------------------------------------------------------------------------------------------------------------------------------------------------------------------------------------------------------------------------------------------------------------------------------------------------------------------------------------------------------------------------------------------------------------------------------------------------------------------------------------------------------------------------------------------------------------------------------------------------------------------------------------------------------------------------------------------------------------------------------------------------------------------------------------------------------------------------------------------------------------------------------------------------------------------------------------------------------------------------------------------------------------------------------------------------------------------------------------------------------------------------------------------------------------------------------------------------------------------------------------------------------------------------------------------------------------------------------------------------------------------------------------------------------------------------------------------------------------------------------------------------------------------------------------------------------------------------------------------------------------------------------------------------------------------------------------------------------------------------------------------------------------------------|
| CrLEA2-54 | AAGAATCAGAGTTAGATCCTTACGTGGCCATTACATGAAGGCTTTCACATGCGCGCTTTTCGGTCCGTTTAC<br>CAGCTTTCCATTTTGTATCTGAAATGAAGCTTAGCTAATGTATAGCTGGAAAGACCAAAATGGAATATAA<br>AACAGGTAAAAAGTGAATGACAGATGCAACACAAAGGTTTGGAGCTGAAAAACCAAGTATAGGC<br>AAAGCAGATAAGTGCTTGTATCATGATTTGATCGCGCATCTATCAGCCCGTGTATTCAACGCGCGGGTG<br>GTAATAGGATTCAACCAGTCGTGTATGAATCTAGAAATTTATAACAGACCCCTTATTACCCCCAAAATA<br>AATTCCTCAACTCCTTTCTCAGCTTCCATAACTGAAAAACATCAATTCGCGAAGTGCTGCCCGGTCTCT<br>GAGTTT<br>CAGGTTCCACAATTAATAATGTTCTCAATATTAATAAAAAAAAAAATCATTAGACCTGTATCTGATTTGGG<br>CCAGACCATAAAGTTTAAACGAATGAGGCCACTTTGAAGTTTGGGTCATCATTTCTCAATCTCTCTCTTGA<br>CCAAAACAATAATCTCATCCTTTTCTCTCAGCTGATGAACCTGTTTACTGTTAAGCTTAGATGTGAGATG<br>CTAGAATATGGGATTGAGGCCAATATTTTATTTTAAAGAATTGACAATCTTCAACGAATTTCAATGTATA<br>TTAAGTATTAACTTTACAATAAATTTAACAATCCATTAAATATAACAAATAAAAACACTAAACAAAT<br>GTTTTATGGTTTGTAAAAATATCAATATATGAAAAGAAAATGTACTAATTGATGACTTCTCCGTCGAAGTG<br>CGGACGCATTCGCTTTAAAGTCAGGAAATCTGCAAGGAGTTACTGGGTATTTGGCATGCAAGTTTGGTAT<br>TACTTTTTGTACAATACTAATTAATATAAAAAAACTATTTTTTATTTCTTATTCTCACACAATGTTT<br>TCCTTTAAGTAAATAAAGTTAAGAAAAAAACACATCTTTCTATACGCATTCACTTTTTCTCTTTTTTC<br>CGAAACAAGGGTAGGAAGAAGAGTAAAAAGCATGTGTAATAATAATTTTACTTGCTTTATATTATTAATA<br>AGCAACTAAGCCCTTGTAGAGAGAAGGGTGTAGTTTGTAGGAAATATTAATAATGAGGATTATGAGAAG<br>GTAGTAGGAGACAAATGCTTTAAAGTTGGGAAAGGAAGATACCAAAACCTTCCCACCAATTAGAGATAAAG<br>AACCAATTTTTGTGCGAGTTCCCTACCTGGCTAAGCTTGCCAAACCAACCAACCTCCTCCCTCACAAGTC<br>TCACCCCCACACAACAACATAATAAACTCCCAATAACCCACATGGGTTGATTTGAAATTTTCCATCA<br>ACCTCC<br>TTTGATTGAACATGTGGTGTAGTAAGTATACAACATATCTAAACATTAGTTTTCTCTCTAACTTTGTGCTC<br>CATTCATCCAACATAATAACCAACAGACCAAGCAGTGCTTGTATAGTAATTTGGGGAAATGATTTGGC<br>TGGAACAAAAAGTTATCACATCCATGGAACATGCCTTGTAAATGCGTCAACATTATATCTACCCTTA<br>AATTTAGTTTTACAAAAACAACCTTAATTTGTGTTAAACAATTTGGATTGTTATTTTTCTGTTCTTTTTT<br>GTCTCTTTAGATAAAAAAAAAAAAAACCATGTTAAGAATGCTCGTAATTTGAAATTTAGTAACTAACA<br>CATTATATTATGAAATAATATAGTTATTATTCTTAATTTGAATCATGAAATTACAATTTTACAAACATAA<br>TTTTTTTCATGTATCACATAATCAATTCATTCAAACCATTAAATTAATAATATATTATTTCTTTAACTT<br>TAATATCTTTTATAACAATTTTTCTAATTATCTTTTCTATCTTTTAAATTAACCTTATTGTTTGTAA<br>TGCGGAATATTACACTTCATTTTTAATTTTCCAGCTATGAATAATTTGTTATTAATTTATCTAATATCATAA<br>TATTACCATAATCATACTGCAATTTATTTTCTAATTTGTTTAGATTATTTTTTAAACAAAGAAATTTAT<br>TATCTAATATCATAATATAACAATAAAATTTTAAACAATATTAGAAAAATAAAATTTGTTTAGATTGCAG<br>ATTTTTCTTTGTTAAATAATTTTATTTGAGTTAAATGTTAATTGAAATTTTAAATATTTTTTATAAAA<br>ATTTTTAACACGTTTTAAATTCAAATTCATATTTCTGATTGAGTTAAATCAAATTTTGGTTGCAAACTC<br>AATCAGGGATTTGAATGACAGTTATCATCCATACACGTCACACGCCTCCGTGCGAATCGAGTAATAACAAA<br>CAATAA |
| CrLEA2-55 | ATATATTTTAAATGATAAAATATAATAATCAATATTTATTTATTTATATATAAAATATTTTCATTTATATAAT<br>ATGTTTTTTATGTGATACTATCTTGTAGAATTTGTTTATAAAAAATAATTTATTTTTTAAAGTAATTTAGG<br>TTAGAATTATTTTTCTTGGTAACCTTTATAAAAATATAAATATAAATAATTTTTTTTAAATAATATGATTAT<br>TATAAAATCATGTGCATTAAATTTTAAAAATTTAACTTATATTCTATTATTTATATGTTTAAATAATATATT<br>ATATGTTAAATTAATATTATTTAATAAAATTTTTAAATTTAACTTTTATAATAAAAAATCTTAATTTAATA<br>ATCAAATTTATTAATTCATATCTTATAAAATATTATCAAACAAAATAATTTTGAATAAAGTATTATATACC<br>CTTTAATTTATTTTTATTTTCAGTAATTTATTTCAAATCATTTAGATATATATGACGTAAGTTGTTTCTTTAT<br>TTTCAGACTGCTATACCTTTCTTAGTCAAACCGAACGGTTTACTTTTCTTTTGGTCTCGAATATTCTTTTCA<br>CTTACAATACAATCATTTAGTTCTTACAACCTTAAATAATGTTGAGTTTATATCTTATTTAAATTTGATATC<br>TCTAAAAATAATATTATTAATAATAAAAAATATAAAAAAAACAATTATATATAAAATAATTTGCCGAGCCTTA<br>AGAGTAAAGAAACGAAAGGATGTGTGAGCACTGCTGAACCTATTGTTAGAACAATCTCAACATTAACAATT<br>AAACATTCAAAATCCAAATCTCAATGTAGCTCAACTTTATCTCCTTTTGGCAATACCCAGAAAAACACACT<br>GTCCCACTACTACACAATTAAGAGCTTCTTTATCCCTTCTTCACTTTCTTAAACCATTACTCCACTTAA<br>GAATAAACACATCTTAATCTCTTCTTCATCGCTTTGTCTGAGTAAAGTGACAATTTTGTAGTAATATCTAC<br>TCAAAC                                                                                                                                                                                                                                                                                                                                                                                                                                                                                                                                                                                                                                                                                                                                                                                                                                                                                                                                                                                                                                                                                                                                                                                                                                                                                                                                                                                                                                                                                                             |
| CrLEA2-56 | TTCTTTTTTCAAACGTTCAAAATTAACGCATTCTTTTCTATGAAAAAAGAAGAAAAGTAATACTGTTCA<br>GATAGAGAAGAAAGAAAGTAGTACTATTGGAAAAATATATCATTTATAAAGAAAGACATAGAAAAGATTAT<br>TTTATTGTCAATTTAAGGAATATATTTGAGTTCGATTTTAAATTTGATCGTTGATTTTACTAAATTAATTTGT<br>AATATTTTTTATAATAATAAGCACTAAAAATATTATAATTATAACGTTGATATAAATCAAGTATCTTAAT<br>CCTTAAGAAAATAATAACTAACGGATTGATAACATTTTAAATTTTATGGAATAAAAAATCTATTAAAT<br>GATACTTGCCATTGTTAAATAAGGAATATATCTCCTATCATTAATATACACAAAAAATTATTATTTATGC<br>ATCATAAATTTGTTATACTATACTTTCTCATACATTTTTTTTTTCTATGAATATTAGATCATGACTTCTTCC<br>ATAAGAAAAAATAATGTAGAGACTTTTGGTGCTGGAAATATACCAATTATATATATGCCAAAGAACTAAGAC<br>AATATTAACATCTTTTATCTATAGCTAAAAATGCTTAAAGCAAGAAAGTTAGCTCGACCACTTCGACGGC<br>ATTACATATTGATTTAGTATTATAAAGGTAATGTTGAATAATTGGCACTTGTAATAGATAAGTCTGTGCATA<br>CAAAATAAAACCTGATAGTGACCTTTCAAGTTTAAACCATTCACCTCTAACATTAATTGAAGCTTCATGC<br>CTTCTTCATATACCTGCTCTATACGTGTTTATGTTTCCACCTCTTGTAGTTGCAACACCTTATTGACC<br>CATCTATATATATTTGACAGAGAAACCAATAAAGAGAGAAAAAGAGATATATCATCAAGGGCTGTATC<br>CACATATATGCAGTGACCACATACTCACATATATAATATATGATATATTTCTTCTAGCTATTGTGATACCA<br>AAAAAC                                                                                                                                                                                                                                                                                                                                                                                                                                                                                                                                                                                                                                                                                                                                                                                                                                                                                                                                                                                                                                                                                                                                                                                                                                                                                                                                                                                                                                                                                                                               |
| CrLEA2-57 | TGTTTCATCCAAGATTTGACAAACACGACATTTTAAATTTATCATCTCTGCAATCGTCATTTCATCATAAGAC<br>TAGGATTAGCTTCTTAATATTTTTTAAACGAAAGGGTTGTATGAGTTATCCAACATTTTTCTTTATTAT<br>ACATGTATCACTTACATGGAACAACCATTTCTTATTTATTAATAAGTGAAGTTATCCGAGATCATAATTT<br>ACCTTCTTCTTCTTTTTCTGTGATGATAAATATCGCTCACCTTAAATTTACCAATTTTTTTTAAATTTTTAT<br>ATATAAGTGCATTCATCTGCTCTTCTTTGTTTTTTTTTTTTTTTATTTATTAAGCAATATCGTCCATATAG<br>ATAGATAATACTTGCTATATATGAAATTAATAAAAAATGTCAATATACTACACGGAAAAAATATCCCAAAA<br>TTAGTAATTAATTTTACATCTTATTTTGGTAAATGATTTAAAGAAAGACACTTTTTTGGTAAAAATA<br>TCATGCAGGTAACATACTTTTTTACTGAAAGAAAAATTTGGATTGATATAATCTTTTATGATTGTTTTTAT<br>AAGAATAAAGAATAAGATTGCTTTTGTATCTTTTTTGTAAAGCTCAATCTACTTCGATTTGTATTAAATTA                                                                                                                                                                                                                                                                                                                                                                                                                                                                                                                                                                                                                                                                                                                                                                                                                                                                                                                                                                                                                                                                                                                                                                                                                                                                                                                                                                                                                                                                                                                                                                                                                                                                                                                                                                                                                                                                                                                          |
| CrLEA2-58 |                                                                                                                                                                                                                                                                                                                                                                                                                                                                                                                                                                                                                                                                                                                                                                                                                                                                                                                                                                                                                                                                                                                                                                                                                                                                                                                                                                                                                                                                                                                                                                                                                                                                                                                                                                                                                                                                                                                                                                                                                                                                                                                                                                                                                                                                                                                                                                                                                                                                                                                                                                                                                      |

|           |                                                                                                                                                                                                                                                                                                                                                                                                                                                                                                                                                                                                                                                                                                                                                                                                                                                                                                                                                                                                                                                                                                                                                                                                                                                                                                                                                                                                                                                                                                       |
|-----------|-------------------------------------------------------------------------------------------------------------------------------------------------------------------------------------------------------------------------------------------------------------------------------------------------------------------------------------------------------------------------------------------------------------------------------------------------------------------------------------------------------------------------------------------------------------------------------------------------------------------------------------------------------------------------------------------------------------------------------------------------------------------------------------------------------------------------------------------------------------------------------------------------------------------------------------------------------------------------------------------------------------------------------------------------------------------------------------------------------------------------------------------------------------------------------------------------------------------------------------------------------------------------------------------------------------------------------------------------------------------------------------------------------------------------------------------------------------------------------------------------------|
| CrLEA2-59 | TTTTTATAAAATATTTTTATTTAAGTGAGGAAATATTTTTATTGATGATCGCCCAACTGGAAAGAGATTAA<br>AAGATTGTATCTCATTAACCTTAAATTTTTTTTTATAAAAAATCATATAAAATTAATAAAAAATTTAATGTTAC<br>TCGCTAAATTAACATAAATTTCCATAATCCACACATGCTCCCTATGATGCGTACCATTAATCCACACAGTT<br>TTACGCTTACGCGCGCACGCTTTTTCTTCTAAGCCTACTTAACAAGCTCACAGCTGCAACGTTGCAAGC<br>ACACTCATCATTTCTTCTCAATTCTGTTTCAATTGCTGAAGACAACCTCGTAACCTCGTCACTCAGTGACT<br>CACCCA<br>TGTCATCCAGATTTTCGACAACACGACATTTTTAATTTATCATCTCTGCAATCGTCATTTCATCATAAGACTA<br>GGATTAGCTTCTTAATATTTTTTAAACGAAAGGGTTGTTATGAGTTATCCAACATTTTTCTTTTATTATAC<br>ATGTATCACTTACATGGAACAACCATTTCTATTTATTAATAATGCAAGTGTTATCCGAGATCATAATTTAC<br>CTTCTTCTTCTTTTTCTGTGATGATAAATATCGCTCACCTTAAATTTACCATTTTTTTTTAATTTTTATAT<br>ACAACGTGCATTTCATCTGTCCTTCTTTGTTTTTTTTTTTATGTATTAAAGCAATATCGTCCATATATAGA<br>TAGATAAATACCTTGTCTATATGAAATTAATAAAAAATGTTAATATACTACACGGAATAATACCCAAAT<br>TAGTAATTAATTTCAATTTACATCCTATTTTGGTAAATGATTTAAAGAAAGACACTTTTTGGTAAAAAATA<br>TCATGACGGTAACATAATTTTTTACTGAAAGAAAAATTTGGATTGATATATCTTTTATGATTGTTTTTAT<br>AAGAATAAAAAATAAGATTCTGTTTTGATCTTTTTTGTAAGCTCAATCTACTTCGATTTTGTATTAATTTAT<br>TTTTTATAAAATATTTTTTATTTAAGTGAGGAAATATTTTTTATTGATGATCGCCCAACTGGAAAGAGATTAA<br>AAGATTGTATCTCATTAACCTTAAATTTTTTTTTATAAAAAATCATATAAAATTAATAAAAAATTTAATGTTAC<br>TCGCTAAATTAACATAAATTTCTAATTTCCACACATGCTCCCTATGATGCGTACCATTTATCCACACAGTT<br>TTACGCTTACGCGCGCACGCTTTTTCTTCTAAGCCTACTTAACAAGCTCACAGCTGCAACGTTGCAAGC<br>ACACTCATCATTTCTTCTCAATTCTGTTTCAATTGCTGAAGACAACCTCGTAACCTCGTCACTCAGTGACT<br>CACCCA |
|           | AATTTTTTAAATTTATATTATTATAAATTATTTTAAATTTTTAAGTTAATATTTTTATTTATATATTTTTATAA<br>ATTTATAACAAAATAATATAAATAAGTAATTTAATTTATTTTTTAATAATTTTTTAAAAATTAATAACAAA<br>ATTGATTTTAGTATTTTAAATTAATAAATTAATAAATCACCTCAAAACAATGTTTAAAGATTTAAATTAAT<br>TCTAAACTGTTAAATAATAAAAACTTAAACCTTAATATTATTTTTAATTTTCATACATCAATGTTTGATT<br>TTAATTTTCAATAACAATATTTTATATTAAATTTTATTTTTAATTATTAATAATTAACATTTCACTTCA<br>TATCCCATTCATAAATTAATAAAAAATGTTAAAAATATCTATCACATTACATAATCATATAAATTTGGTAA<br>AGAAAATTCATACAATGTTTAAATAAAAAATAAAAATGTATAAAATATATTTTTTATTAATGTTACGTCAT<br>GCTTGAGTTATATTTTTGTTAATTATTTTATAGTATTGATTAACGTAAATAATAGATATACTTTTTTTTC<br>GTTGAATTCATCAATTATTAATTATTGGATCGAATTTAAATGAGGAAATTAATTAATAATTAATAAGATT<br>TAAAGATTAAATTTGATATAAATAAGATGTCAAAATCATAGAAGGACTAAAAACGGAATCTAAAGTTGT<br>AATTAAGTCAAAACATAATTAGCGCTTCTTTTTGTTGTTATGTGAATTTAAACGTAAAAAATAACAAAAT<br>AAAAAAAATTCAAAAGCAGTAGTCAAGTTGAAATTCACATATGCCCTATGACGTAGCATCATCCAACA<br>CAACGTTTTACGCGCACGCTTTTTCTTCTCAGCTACTTAACAAGCTCACAGCTGCAACGCTGCAAGC<br>ACACTCATCATTTCTTCTCAACTCTGTTTCAATTGCTGAAGACAACCTCGTAACCTCATCACTCAGTGACT<br>CACCCA                                                                                                                                                                                                                                                                                                                                                                                                                  |
| CrLEA2-60 | TTGCCGTATATATCGGTATATTTGATCTGATTTTAATTAATAAATATTATCATAAATGCTTGATGGCAGCGT<br>TAATGATAACTTGCATAGGTGAGCCTCTCTTTTTGTTGCCACTTATCACACAGGCTACTACTATTGTGTTT<br>TTATCCAATTCGATTGATTGACCCCTCCGCCAAGTGCTCGCTTGAGTTGTTTTAACACAATCAGGCTAA<br>GCGGAGATAAATAGGTCCAACACCAAAATTCATCTTCAATTTTAGATTTCATTTGTTAATTTGTTGATG<br>TCAAAATTTAATTAAGTGAATTTTTTATTCTTATAGTTTATAAAATTAATTTTAAAGTGTGATATTTATG<br>AAATTTTTAAAAATTTATAATTATTTTTAAAGCTATTTTTCTTATTGTTAAAAAATAAATCTTCCAAAT<br>TATTTTTGACTTTTTCTAAAAACATAAATAATTTTTTCAACATAAACGATTTTATTATTACTTTCTAATGT<br>CATTTTCTATCAACTTTTTAAAAACAAATGAACCAATATAATGAAATTTTCTGATTAATAATTTAATAAAT<br>AATTTTAGACTTCCAAAATCTGATAATTATACCTTTTTTATTAATTTAAAAATTATATTATCGTCATTAAA<br>TATACTTAAGAGCTGCATAAACGATAGATAGTCGTTGAAGTCCTGCAATTTGATGGTCTGCGATATAGATT<br>AGACTTATCTTATTTGTAATGATATTTATTGTTGTACATGTAAAGCATGAATGAGGATTGGAATTTGGAAA<br>GTAGAAATGTAGTAAAGTCTGAAGACATATCATGATAGTTGTAAGAAATTAACGCGTACATGATTGAC<br>GAGTGTGATACAGTAATATCGTAGTGAGTAACAGTGTATGAAGATGGCGGACCTTGGATTAGGTGTTGA<br>CACCAGGTCGTTACAGTTGGTTCCGCCCTCAGTTTTCTAAAAATAACCAACCCAGTAACGCCACCCGTACA<br>CACACT                                                                                                                                                                                                                                                                                                                                                                                                                 |
| CrLEA3-1  | AAACAAACAACCTTTTTGAGTTTATTTATTTATTATTAATAACATTTCATGAGGAGTAACAATTTTCATA<br>ACTTAAACGAGAATAGGTTTAATAGTTAAAAGAGTCCCAAAATTTATTATAAGAGAAGAAACAGAAAAATT<br>AATAATATGGTTGAATAATAAATTTAATATTTACATTTGTAACAACACTTTTTTATTAAATATGTAAAT<br>TTATTAGTTACATAGTTACTAAAAGATTATCTCTAAATATAGAAGATTATAGCCATTAATATTAACCTT<br>TTGTTCTAAAAATAAAAGAAAAAATTAACAAAAATATAGATGATCAATCATATTTTATCATCTATCAATTAAT<br>TTAATTTTATCATTTTTTATTTTTTTTATGTACAAATAATTTTTTTTTTATATACAAATAAGATCGTTCATT<br>ACTAAAAGATGATTCATAAATTAATAAATAAGTAGATAAATTATTTATTATGATTAAAGATTAAATGAG<br>TTATTTTTTATTTTTTGAGTAAAGCTAATTTACTTTGTATTTTATTAATAATGTAACAATCTATATCATG<br>AATCTAATATGTCTAAAAAGATAAGCATAGAAATAATAAAAAATCCTGACTTTGAAGCCTGGACAAACACTC<br>AATGAAACTTGTGACATGTCATAATCTTATAATGAGGGAACCTTTCCTCTCAGTAAATTTTCATACCCCAA<br>AAAAAAAACAAGTTGGTCACCTTAAAAAGTATTAAATTAATCTATCGTATAAGGGATATATCCAAAGACA<br>GATAAAATCCCTTTTATTTTTGTTTTAACTAAAGAATATTTATCGCAGGTATTTGGTTAAAGAAAGAAAG<br>CATGATCATTATCAATAAAAGAAAAAAGAAAAAAGAAAAACAGCATTATCATTTGTACGTTGTAGTATTG<br>CCATGATTCTCGATAATAGTAAGTCTTATGAGATATAAGTCGTTTTAGAGGGGAAAAAACCACTTCTTTC<br>TCTTAT                                                                                                                                                                                                                                                                                                                                                                                                              |
| CrLEA3-2  | TTATTTAAATCTAATTTATTTTATTTAAAAAATTTAACAATAAATAAATTTATCTATTTTATTAATAAGTCA<br>ACACAAATTAGACTTTTTAAGTTCTTAACTTGTATCTTCTATCTTATTTTAAAGAAAAATCTAGAT<br>AATCTATTTTCATCAATATATCTTAAAGAAATTTTAAATAATTTTTTATTTTCAATTTTCATATTTTCCT<br>ATACACTGCTTTCTTTTTAATAAAACTAATTTTATAATTTTATAAATCATTTTTTATTTAAATTTCTAAAT<br>ACTAATTTTAGTAATTTAAATTTTCTAAAAATTTGAATTTGAATTTAAAAAATAAATTTTGAATTCATATCA<br>AATGAAATATTTCTAATTTTGTGTAATTTTATTTTATCATTTTATGAAAAACACTTTTATATTAACAT<br>TTGATATTAATTTTATAAAAAATTAATTTAATATTTTATAAAAAATTTTGTGCAAGAAACAAATTTAATGTT<br>TTATCATTTCAATGTTATATAAATTTCAATTTAAGAGTTAACAATTATAATTAATAAACAATGTTAGGAAAT<br>TATAATTTTAAATAAAAAATAATTTATTTTATTTTAAATTTTAAATTTTAAATTTTAAATTTTAAATTTAA<br>ACATCATCTAATTTATTTATCTAATATAAAAAAATCTACTTTACTCTTATTATATTTTCATCTCATACT                                                                                                                                                                                                                                                                                                                                                                                                                                                                                                                                                                                                                                                                                                                                   |
| CrLEA3-3  |                                                                                                                                                                                                                                                                                                                                                                                                                                                                                                                                                                                                                                                                                                                                                                                                                                                                                                                                                                                                                                                                                                                                                                                                                                                                                                                                                                                                                                                                                                       |

|          |                                                                                                                                                                                                                                                                                                                                                                                                                                                                                                                                                                                                                                                                                                                                                                                                                                                                                                                                                                                                                                                                                                                                                                                                                                                                                                                                                                                                              |
|----------|--------------------------------------------------------------------------------------------------------------------------------------------------------------------------------------------------------------------------------------------------------------------------------------------------------------------------------------------------------------------------------------------------------------------------------------------------------------------------------------------------------------------------------------------------------------------------------------------------------------------------------------------------------------------------------------------------------------------------------------------------------------------------------------------------------------------------------------------------------------------------------------------------------------------------------------------------------------------------------------------------------------------------------------------------------------------------------------------------------------------------------------------------------------------------------------------------------------------------------------------------------------------------------------------------------------------------------------------------------------------------------------------------------------|
| CrLEA3-4 | ATCTCATACTATGATGTGCTATTGTAACATCAAATTGACAGATTCCCCCTAAAGTTGTTTGCAGGCTTT<br>CCTTAACACTCGGGTTGGTATGAAAATATTGCACTATTCAATGTGGGTCCCTTCAATTGAAATAGGACGAGG<br>CTCTATGAATGTACAGGTGGCAGCAAGAAGTTGCACATGAATAATTCATATTTTGCAGGCTAG<br>TATTTCTGCCTTAATCATGCACCCAAATTGTGTCTTTACTCAATTACGCGTCTCCACTCTCTTTCTGCCC<br>TATATA<br>TTTATGTTTTTAGTAAATTAGGATTATAATAGGTATAATTATGGGAATAATTATTATAAAAAATTAATTACT<br>TAAATGATAAAATAAATTATAATTAAATAAAAAATATATTATAATGTTAATATATTTAAATTA<br>TATTTAAAAATATAAAAATTGAGCAATTGATAAGAGGTAAAACTAATCTGCATGAAGTCATAGATTTAAACC<br>TTATTTCTTTTATTAGTGACATAATTTTATTTTATTTATTTGCGATTTCATATAAAGATTTTGGTTGATAT<br>AATTAGTTTTTTTTTATACAACATGTAGAACGGTGTGTAATTTAAATTTTTTATATCCAATGATTCATTAC<br>TATATATAACTTTAGTTTATATTACCAATTTTAAATTGTAAAAAAATTTATAAAATTCGTGATTTTAAGATA<br>ATTTTGACATTTTCGTCTCTGTTGTGTTTTTTGAATAATATTTATTTAAAAATTTTAAACCCTTTCAAATA<br>TTTATTTAAACGTTTAAAAATAATCAATTTGAAAAAAGAAACAAATTTTTTATCATTTTAAAGAAAAAGTTTA<br>AAATAATTTAAGATATTTTAAAAATGATAATTATATTTAAGATAAACATATTTTAAATAATATAAAAAAATA<br>AAATACAATTTTTCTTAACTTTTTTTGAAAAAATTTGAAAGCATGCATTAGTTTTTAAATATTTTAAAAAT<br>TACTTTGTTTTCTAAGCTTAAATAAATCGATACAAAGTTAAGGTAAACGTTAAAAATTCGATGCATAGAAGTG<br>TAGCAATAAAATTACTATTTGTACAGTTTGTTCATCCCTTCTCTAATTTCCGTATATCTACACATTTTGT<br>TTAGGATTTAGCAAAATTAGTTCGAATTTATGCTTTAAAAAGAAAAATAATGGACAATTTACAATTTTAAAA<br>AATGGGTATAGGAATCAAGCAACAGGGCTACTGAAAAAGAAAAATGAATAGGTGTGAGAAAAACGAATTTT<br>GTGACG |
|          | ACATTTTTTTATTAAAGTAAATTACAATCATATTTTTTAAAGGTAATTAATTTTTTATCAAATAGTTATTTTT<br>ATTTTTTATATCAATTTTCTAATTTATTTAATAATACAATATCATATTTTCTTTTTATTATATAAATTATCT<br>TTAATATTTTATACAACCACATTAATAGAAAGTTGAAATATCCGATGAATTTTCATGAATTTTATTGTAAT<br>GTAGTTTTATCCATTTTATTAACAAGGGCTCATGTGAGCACTCCCTTCTCTTTTTTCTATTCTACTCAA<br>AATTGTTTAAAGCTGAAAAAAGAGTACTCATACTCCATAAGGTTAAAGATTTTTTTTTTTAAATTTTTTA<br>ATTTTTTATATTTTCTTCTCTTACGTAACACAAATCCGACTCACTCCATGGCATATGTTCTGATTACAC<br>ACGCATTTCCACACAAGGTAGCAAGTAAATGGAGCAACAATTCGGTTATATAAACATCAAACTTTAGACCA<br>CCTTGCAATTTGTATTTGAAGTATGGCTTTTGAACCACTGATTTCATTTCCAAAATACAATCACACAACACTT<br>TCTGCCTTTGTTGACATCTAAAAAGTCAACCCTTTCTAGATGGCTCTGTGCTTCACATGCAATAGAACTTA<br>TTCTCCATTGCATCCTTCTTACTGCAGTACTAGACTATTATAAATACCCATCATAAAGGCCTCGAGGCTTT<br>GAAAAAG                                                                                                                                                                                                                                                                                                                                                                                                                                                                                                                                                                                                                        |
| CrLEA3-5 | TTTTAAATATCTTTAAAAATTCAAATGATAAAAGAAAAAGCAAGAATGGAAGTTAATAAATAAGGTACAT<br>AATAACTTGTATCTTTCCACCCCTCTTATCATTGAAATAAAATTCATGAAACTATAAAAAATATTTTTTT<br>GAGAATCAAAATATGTATGAAAAATACCTCTAAAACTTATAACAAAGATGAGAATTATACATTTCTAAAATTT<br>ATATCCTAAGAAATAAATTTGTGAACTTGAAACAAACACTCTCTAAATATACCATTGTTTCATTGTACT<br>TTTTTAAAGAAAAATGTATGATTTTTTTCATTATATATATACCTTAATAAAAAATAGGAAAAAGAAAAATA<br>TGGGAGAAAAAGTTCAAAAAGTAATTGATAAATGATATAATATGATAATAAAAAATAGTAGAAAAATAGAA<br>ATATAATATAAAGTATTATCAAACTTGGAAATTTTAAACTATTTTATAAGTTAAACAATATTTATTTTAA<br>ATTAATAAAAAATTTATAAAAAATAAATATCATTTTTTAAATCAACATTTTAAATTTTATTAAGTTGTGTAT<br>AATTGCTAATCCATCGAGGAACCTAGATAGTTCTTCTAATTTGTTATTTTTTAAATTTATTAAGATTGATTT<br>AATAATAAAAAATTTAAAAATTAGAGTAATTTAATAAATCATGTTATTTTTTTTTTAAAGAAAAAGAGATTAT<br>AATAATTTATCTCTCTTTATCTGTAACAAAAATATAAAAAAATAAATAAATACAGTTTCCCTTTTCAAA<br>GTAGCACAAACCAACGATACCCATTCTCTCCCTAATCATAAACGAAGATTTTTTTCCCTTCTTTTTTAG<br>GGCAAAATCTCGAGAGTATTTAACAGATACATTAAGTTACTTTTAAATTAAGTAAACAGTAAACAATATT<br>TAAAAAAATCAATATATCAAAATTTACATTTTATAGTAAATCTTAACTTTTTTTTTTTTTGACTTGTCTTAA<br>GTTAGC                                                                                                                                                                                                                                                                                                                |
| CrLEA3-6 | ATACAAGACCTAAAAATTGGGAAGATCTTAAAAATAGAGAGTAAAAATTTAAAAATAAAAAATAAATTTTAA<br>TTAAACCTTTGATATATTTTACATACTAAAAACAGCCGTTCAATTCATCATATGAATAAAAAATGGTCCAACC<br>CGAGTCCATAAATATTCTTTACGAATTTATAGTCATTGTTATATTAAGATTATGTTTATAAAAAATAAGTTT<br>TGTTATATTTTTTACACACTTTGTTATTTTATTATATAAAATAAACTAAATAAAAAATTTATATAT<br>TTATTATTTTTTAAAAATAAAAAATTTAATGTTTTTATTCATAAAAAATATCTCATAAATATAAATATAT<br>TTTTCTTTATAAATATAAATATATTTTTTATTAGACGTAGAATATGTTTGGAAATTTGTGAAGTTTCAGTA<br>GTTGAATTTATTGGATAAAACGTTTTTAGTAATTAGAATGGTTAGTAGAAAAATTTAAATCATGATTTTTTA<br>ATATGTTCAAAATATATAAATAAAATTAATTTTTTATTAAAGATTATAATATTAATATTTAATGTGT<br>AAATTTTGTAATTTTCAATAAAGTTTTAGTGTATGCAATTTTTTAGTGTCTTAGTGACATAATATAAAAAA<br>ATTCTTTAAAAATTATAGTGTAAAAAATAAATTTCTATTATGGGATAAGTTATGTTTTTAAAGTATAAAAAA<br>TATATGCTTAATAGTCATAGATGAATTTGTGACAGATTCGATATTAATGACTGTAAACATGAAAAGGAAAT<br>ACAAGCGCATCCTCATCTTACTAGAAATTTATGCAGAGAATTTATGAAAGTGAAACAAAAGAGGTGAAGTG<br>GTGGTCAAACCAAACTAAAGGGAACCGCTTTAGCCTGAATACCCACGTTGGTTAGACACGTGGAGAATCT<br>GATTCGTAGATTGTCTTTGTGACACTGCAGAGATTTAGAAGATAGATGTCACCAGCGAGGAGCAACACAG<br>GCTACG                                                                                                                                                                                                                                                                                                                   |
| CrLEA4-1 | ATGAGAAACAAATTTTATAAATAAAATTATCTATATTCATATCATTTTTAGCTTGAATTGGATCAATTTTTTA<br>AAATTAATTTTAAATTTGATCTAATGCAATAACAAAAATCAGCTTTTATGATTTTTTAAATTTTTTATAAAT<br>TATATTAATTAATCAATTTCTGAACATCTTTAATTATAGGAGACAGAATAATTAACATTTAGAAATATACT<br>ATTCTTTTATAATGATTACTTTTTTTTAACTTTTGTATATCAACCATTTACTTTTTTTTTCTATTTTACTGT<br>ATATTTTGTATAAAAATGATATATGAATGCAATTTTCTTTGTTTCCGGAGATGGTGATTACCGGTTTGT<br>CGATTGTAAAAATGTTTCAATTTGATTATAAATGTTGGTTATCATATATTTTAAATTTTATTTTTTCAACT<br>CATTTTACCTATTTTAAATACACAAACATTTTATTTCTTTTCCATATAAATGTTTCAAGAAAAACAAAAATC<br>TCTGTAGTATTGAATACAGAGTAGAAATCATCATTTTTTTCAGAATTCCTATAAAATGAATGTTCTGGATTTT<br>TGACGACTCCAGCTGGACATATATTCATAGAAGGATGAGAGGAATGATTTGGTTACTCCTTCTTCTCCTTC<br>AGTATGTGGCACCATTTTGAGTTAAGATAACAATACATCATAAATGAATCATGATGTTGGGCTTGTAAATGGG<br>ACCCAGTGACCTACCTCTCCTCCCTCAATCAACACTTAAATCTTCTCATATGTTCCCTCCTCCCTGCAAT                                                                                                                                                                                                                                                                                                                                                                                                                                                                                                                                                  |
| CrLEA4-2 |                                                                                                                                                                                                                                                                                                                                                                                                                                                                                                                                                                                                                                                                                                                                                                                                                                                                                                                                                                                                                                                                                                                                                                                                                                                                                                                                                                                                              |

|          |                                                                                                                                                                                                                                                                                                                                                                                                                                                                                                                                                                                                                                                                                                                                                                                                                                                                                                                                                                                                                                                                                                                                                                                                                                                                                                                                                                                                                                                                                                                                                                                                                                                                                                                                                                                                                                                                                                                                                                                                                                                                                                                                                                                                                                                                                                                                                                                                                                                                                                                                                                                                                                                                                                                                                                                                                                                                                                                                                                                                                                                                                                                                                                                                                                                                                                                                                                                                                                                                                                                                                                                                                                                                                                                                                                                                                                                                                                                                                                                                                                                                                                                                                                                                                                                                                                                                                                                                                                                                                                                                                                                                                                                                                                                                                                                                                                                                                                                                                                                                                                                                                                                                                                                                                                                                                                                                                                                                                                                                                                                                                                                                                                                                                                |
|----------|------------------------------------------------------------------------------------------------------------------------------------------------------------------------------------------------------------------------------------------------------------------------------------------------------------------------------------------------------------------------------------------------------------------------------------------------------------------------------------------------------------------------------------------------------------------------------------------------------------------------------------------------------------------------------------------------------------------------------------------------------------------------------------------------------------------------------------------------------------------------------------------------------------------------------------------------------------------------------------------------------------------------------------------------------------------------------------------------------------------------------------------------------------------------------------------------------------------------------------------------------------------------------------------------------------------------------------------------------------------------------------------------------------------------------------------------------------------------------------------------------------------------------------------------------------------------------------------------------------------------------------------------------------------------------------------------------------------------------------------------------------------------------------------------------------------------------------------------------------------------------------------------------------------------------------------------------------------------------------------------------------------------------------------------------------------------------------------------------------------------------------------------------------------------------------------------------------------------------------------------------------------------------------------------------------------------------------------------------------------------------------------------------------------------------------------------------------------------------------------------------------------------------------------------------------------------------------------------------------------------------------------------------------------------------------------------------------------------------------------------------------------------------------------------------------------------------------------------------------------------------------------------------------------------------------------------------------------------------------------------------------------------------------------------------------------------------------------------------------------------------------------------------------------------------------------------------------------------------------------------------------------------------------------------------------------------------------------------------------------------------------------------------------------------------------------------------------------------------------------------------------------------------------------------------------------------------------------------------------------------------------------------------------------------------------------------------------------------------------------------------------------------------------------------------------------------------------------------------------------------------------------------------------------------------------------------------------------------------------------------------------------------------------------------------------------------------------------------------------------------------------------------------------------------------------------------------------------------------------------------------------------------------------------------------------------------------------------------------------------------------------------------------------------------------------------------------------------------------------------------------------------------------------------------------------------------------------------------------------------------------------------------------------------------------------------------------------------------------------------------------------------------------------------------------------------------------------------------------------------------------------------------------------------------------------------------------------------------------------------------------------------------------------------------------------------------------------------------------------------------------------------------------------------------------------------------------------------------------------------------------------------------------------------------------------------------------------------------------------------------------------------------------------------------------------------------------------------------------------------------------------------------------------------------------------------------------------------------------------------------------------------------------------------------------------------------|
| CrLEA5-1 | <p>TCTCTAACCCATTTCAGATTAGATGTCACCACCAAGGAGCATCTCATCATGACGTGTCACACTTCCCAAGC<br/> ATGCCTGCCAAATGTCTCCACCGCCCTTCCCGCCAGGTGCCACTTTCTCATACCCCATGTGTCACTCA<br/> CTCCCTCATTCCTTTCCATTCCCTCCCCACTCATATATATCATCAAACCCCTATTTCATTCTCATAACA<br/> AATTCG</p> <p>ATAAAAAGAATATTTATTTAAAAATTGTGTTGTTAATATAATTCAATAATTACATGTATTAAATATTAGTT<br/> CAAAATTCCTAGACTCCTCCTTAATAATTTTCTACAGTAACATCCAGCAAAAAACCTAATTGCATAAAC<br/> GACTCAAAAATAATATATATATATATATATATATCAATCAGAATTTATTGATATTATGTACCAAATTTAAT<br/> GTTTATATGATTTAATAATTTTTAAGAAAATATAAAATTTTATTAAATTTAATAATTAATTTAAATTTTATA<br/> TTTATAAAATTTTATATAAAATAAAATTAATAAATATTTTATTATCATATAATTTTATTTTAATATTTAA<br/> TATATTACTTAAATATTAATAATATATTTATTTAACTTTAATATAAAATAATCATAAATCGATTAAATTA<br/> AATAATCTTATATTCCTTTAAAAAATTAATAAATTAATAAAATACTAAGTATTACATCTAACATAGATTTT<br/> GAAACATCCCTAGTTAAAAAATCTTATACTATATAAAAAATTATTAATTAATTTAAATTTAATATCTAA<br/> CGTAGATCTTGAAACCCCTCTCTCTCTCTCTCTCTCTGTAATACTGAACCTACCATAGCACCTGAAAGAAA<br/> AGGTTGAGACTTGAGAGAACCGCAACCGAGGCACTTAAGCAGAGTTTCATTATGCTCTAGAAGAACTGGTAC<br/> GTGTCATTTGGGGAGTTGCAGCTGAGTGTCAATTTGGCCATTAGCCACGTGTGTGCTCACGTGTCAATGC<br/> ATGGCCACTGTTACTGTTCACTTTTAACCTTTGTGTGAGTCCCTGGGATTGCGCTACATAGATTGGGTT<br/> ACGGAGCATTAAATTAATTATATGTTACATTTTGGTGTCCATATTATATAAAGCCTCAAATAACCCCTCCTT<br/> TGCTGTATATAGCTTGAAGCCTTCAACACATAGCAAGTTTCACACATAATTGGTATTGCAAATAAGTGCG<br/> TAAAAAG</p> <p>CAATAATTTACTAACCAATAAAAAATAAGTAATTTCCCTCCACAACACAATCCTTTTGTTACATTTTGTTTTA<br/> TTAATAAAAAATTAATCCAATTTATCATCATTATCATTATTTTAATTATTTAATAATTATAATAATATCAT<br/> ATAATAAATAAATAATTAAGAATAAAAAATATTATAATTTGAATTTATAATATTATATATTTAAACCAAACAC<br/> AACCAGCTGCATGCCATTGTAAGAAATTTTTTTTATTTTTTTTATTTTCTATACTATAATATAGAATA<br/> TTAATATTTTCTTATTTTCTTTATTAATAAATGGTTTTTATCAGCATATTTTATTAATTTAACTAT<br/> TAATATAAATATTATAAATTTGTACTAATAATAAAATATATTAATAAATAGTTTGATTAATATATTATCAA<br/> TACATTAAATATTAAATATAATATATTATTTATTAATATAATTTCTATAATTAATAGTATTTGAACATTTA<br/> ATTAACAAAATATATACTAATAAGAATTATTCAAACACTTAATATATTTTATTTAATAAATATTTTAA<br/> TTATTATTTGCTATTAACATCGTTACTAATAATTACTATGAATATGAGAATGTCTAGTTTTCTAGTCA<br/> TTTAATATGAAACCAATCAATGATGGAATAACCGTAATCCGCATTTTGGACTTCCATATTTTTAATTTAA<br/> ATTTTAATACCGTTAATTAATTAAGTAATATACAATTAATAATTAATGATAATGTGTACCACAAACCGAT<br/> TGGTACATGCTAGAAGTCTAGAATTACCGTGCAAAGATTAGTATGTGTGATGATATGCCATTTTAAACAGT<br/> GGACCTACGTGCGTGTCTCTTACCTTTAGCCACGTGTCCATGCATGCATTCCTATGCTTACTTCTTC<br/> CCTAGCTATATTTATTACTCTGCATTAGTTTACTACTTTAATCACAACACATGCATCTTTTTTCACTCTAT<br/> AAAAAC</p> <p>AACTAATTTTCTAAAAATAATTAATTAATTTTAAAAATAACAAAAATAAAATATTATTATTATTAT<br/> TATGTTATTATTATGATAAATAATGGTATTATTATATATATTATTAATAATTAATATATAAAATAAATAAT<br/> CTATATATTATTATTATTTATATAAAAAATAATATTATATATAAATAATATTATATTGAATAATTTTATAAA<br/> TTAAATATAATTTATATATCAAAATAATATTATTATTTAATTATAAATTTATAAAAAACATATAAAATAAAA<br/> ATAAAATAAAATTTATTATTATTAAAAATATTGATAATAAATAAATAGTTGTAGTAGAATATTGTTTAA<br/> CGAATATAATGATTATAATGGTGATTAGAAAATGTTATTAGATAAAATTAATAATTAATAATTTGAAAAAT<br/> AAAATTAATAATTAATAGATTTTTTATTTTATAAAAAATTAATTAATAATTTTATAAATATGTTAAAA<br/> ATTAATTTAAAAATTTTGTGAGAACACGTTTTAGTTTTTACATTAATTTGAAATCAAAATATAAAACCA<br/> CGTCAGATGCGACAATATTAAGACCCTTGCAATTTGGAATAAAAAACATAAAATAAATAAAGTTTCATGATA<br/> TCTAAACCATGAATTAATGTGGAAGAAAGAACGAGGTTGATTAATTACCCTGTAATTTCCAAGGTGAATCAG<br/> GTGATTAATTAGGTAACGGAAGTGATTGGACGGAGACGAAGGTATTGACGCAGAATTTAACGAATCAGG<br/> TGCGGTGATTTACGGTATAATATGTGTCTGACATTAATTGCGGTGGAAGGTAGCTTTTGGATGTGATTA<br/> CTTTGATGCCTGCACAAGTAAATATCCTTAAAGGAAATGTAAGTATGATGGAATTAATAAATAGAAGCAAT<br/> GAAAGTGATGGAGATGATCTCGTATATCGGGTACATAACATGGTGTTAATTATTAGTTAGTTAAATGATA<br/> ATGGCA</p> <p>TGGGTATACAGTCCATCGTTTGAATTAGGGATACCCAAAAATGGTATAAACAAATATATATATATATAT<br/> ATATATATATATATATATATATATCTTTATCTTTTGATTTTCTAGGGACAACCTTCATAATTTTCTCAAT<br/> TCTTAGCTTCCACCAATTCAGAAACGCAAAATCAGTTGCTTTACCTTTGATAAATTTATTAATAAAGAA<br/> GCATTTAGCGTATTTAATGTACAAAAAGGAGGAAAAAACAAGAACATTTTAAAGACAAGGAAGAGAATT<br/> GAATATGAGCATTTGGTTTTATGTGCCTATGTAAATGCCAATACTTTGACATTTGAAATTAAGATGT<br/> AGGCAGAATTTGATATACTATATATAAAGCTTTTCATAGAAAGTAATGCAATTAGAGAGTGAGGCAGTAA<br/> AAATTTTGGCAATGTTACGATTTACGATTCAGATGTAAAATGTAAAGTATTAAGATTTCTGCTCAATTCGTTAA<br/> ATATGAAAGGAATAGAGTGAATCGTGGGATGTAATGATATCTAAAAATCTGCATTTTACAACAAATATAT<br/> AAATATAAAGCATCTAATAATTTTCAGTTCTATTAAAGATTGACGACAAAAATAGCTAAATTTGGCCTTCA<br/> CCAAAAAAGAAACACGCTGTAGAAAAGAGGAAGTCATTGCACAGTTTCTCTCTTTTAAATAGATAAGGA<br/> GAGATAGAGGAAAAACATTGGAGAGTTTCAACACTGCATAAAAAATAATATCAGCATATAAATAAAGTAGGA<br/> AAAAAGAAAACCTCCAAAGAAATAGGTGGAGGAGAGAAGTATGAGGACATTTGGGTGGTTCATCGATTATCAT<br/> GTGGGTAGGAAAGGTAGGTTTGTCTAAAGTTGCCACGTTTCTGAAATGTCTGGAGGAGCAACACGTGTA<br/> AATATAGGAAAAATAAAGTGTGTATATATAAAGAAAGATGAGGGAAGAGGGTGAGTCTAAGGAAGTGAA<br/> AGAAAG</p> <p>CGTATGCAGTGTAATCATTTCTAACACGCGAGCTGGACATGATTTGAATTTGAGTAAATGTTATACCAACCA<br/> CCACAACCTCTCCATCCCCAATTTGTGTACAGATTCTCCAAGGGATGAGTAAATTTATGTAAATTCATAT<br/> TTTTCTTTTGCACTCTCAATACTTAGATGTCAGAAGGGTTGCGAGTTCTTGTAATTTCTCTCTATAAGAT<br/> TTGCTTAGTTGTTATATTAGAGGAAGGTTGCTGCTTAATAATTGCTTACCTCATCTGAGAACGGG<br/> TGATATCAACATTTGCTATATGTTCTTCTTCTTACACGCATGATTCGTTCTCTTTCCATATCATACTGA<br/> GAAGTTAGAATATTACAGCCATATAAACTAGTTAAGTTGGTAATATATATTGAAAAATTTGAATATTGAT<br/> GTAGAATGTGATCAGATTAGCAGACTCTAACGCATTAGTCAGAAATGCGTTAACAATTATAAATTTTAA<br/> TCAAATTTGATAAATCTCAATCTTTTATAAGCAGATAAATTTCTCAATAAGGTCATACAATCTGCTACTAA<br/> GATATATGTTAAACCTAAATTAACCTTAGTGGATTAATATATATATATAGTTTTTAATCTATTAACCTAGT<br/> AATAATGAAATATTCTGTTTTAGAAAGTATTTAAATAATGGTATCTGCAAACTTGTTTTTTTACTTTACC<br/> CTATACTGTTATGCATTATGTTGTGAGTAAGGGAGAATGAAAAAGGGACAGTTGCGGCCATTGCTCATA<br/> TTATGTGTAGGTTTGGCATGGTCATGGAAGTGACGTGGCTATCACACAAGCAATCTCAAGTGACATTTGTC</p> |
| CrLEA5-2 |                                                                                                                                                                                                                                                                                                                                                                                                                                                                                                                                                                                                                                                                                                                                                                                                                                                                                                                                                                                                                                                                                                                                                                                                                                                                                                                                                                                                                                                                                                                                                                                                                                                                                                                                                                                                                                                                                                                                                                                                                                                                                                                                                                                                                                                                                                                                                                                                                                                                                                                                                                                                                                                                                                                                                                                                                                                                                                                                                                                                                                                                                                                                                                                                                                                                                                                                                                                                                                                                                                                                                                                                                                                                                                                                                                                                                                                                                                                                                                                                                                                                                                                                                                                                                                                                                                                                                                                                                                                                                                                                                                                                                                                                                                                                                                                                                                                                                                                                                                                                                                                                                                                                                                                                                                                                                                                                                                                                                                                                                                                                                                                                                                                                                                |
| CrLEA6-1 |                                                                                                                                                                                                                                                                                                                                                                                                                                                                                                                                                                                                                                                                                                                                                                                                                                                                                                                                                                                                                                                                                                                                                                                                                                                                                                                                                                                                                                                                                                                                                                                                                                                                                                                                                                                                                                                                                                                                                                                                                                                                                                                                                                                                                                                                                                                                                                                                                                                                                                                                                                                                                                                                                                                                                                                                                                                                                                                                                                                                                                                                                                                                                                                                                                                                                                                                                                                                                                                                                                                                                                                                                                                                                                                                                                                                                                                                                                                                                                                                                                                                                                                                                                                                                                                                                                                                                                                                                                                                                                                                                                                                                                                                                                                                                                                                                                                                                                                                                                                                                                                                                                                                                                                                                                                                                                                                                                                                                                                                                                                                                                                                                                                                                                |
| CrLEA6-2 |                                                                                                                                                                                                                                                                                                                                                                                                                                                                                                                                                                                                                                                                                                                                                                                                                                                                                                                                                                                                                                                                                                                                                                                                                                                                                                                                                                                                                                                                                                                                                                                                                                                                                                                                                                                                                                                                                                                                                                                                                                                                                                                                                                                                                                                                                                                                                                                                                                                                                                                                                                                                                                                                                                                                                                                                                                                                                                                                                                                                                                                                                                                                                                                                                                                                                                                                                                                                                                                                                                                                                                                                                                                                                                                                                                                                                                                                                                                                                                                                                                                                                                                                                                                                                                                                                                                                                                                                                                                                                                                                                                                                                                                                                                                                                                                                                                                                                                                                                                                                                                                                                                                                                                                                                                                                                                                                                                                                                                                                                                                                                                                                                                                                                                |
| CrDHN1   |                                                                                                                                                                                                                                                                                                                                                                                                                                                                                                                                                                                                                                                                                                                                                                                                                                                                                                                                                                                                                                                                                                                                                                                                                                                                                                                                                                                                                                                                                                                                                                                                                                                                                                                                                                                                                                                                                                                                                                                                                                                                                                                                                                                                                                                                                                                                                                                                                                                                                                                                                                                                                                                                                                                                                                                                                                                                                                                                                                                                                                                                                                                                                                                                                                                                                                                                                                                                                                                                                                                                                                                                                                                                                                                                                                                                                                                                                                                                                                                                                                                                                                                                                                                                                                                                                                                                                                                                                                                                                                                                                                                                                                                                                                                                                                                                                                                                                                                                                                                                                                                                                                                                                                                                                                                                                                                                                                                                                                                                                                                                                                                                                                                                                                |



|        |                                                                                                                                                                                                                                                                                                                                                                                                                                                                                                                                                                                                                                                                                                                                                                                                                                                                                                                                                                                                                                                                                                                                                                           |
|--------|---------------------------------------------------------------------------------------------------------------------------------------------------------------------------------------------------------------------------------------------------------------------------------------------------------------------------------------------------------------------------------------------------------------------------------------------------------------------------------------------------------------------------------------------------------------------------------------------------------------------------------------------------------------------------------------------------------------------------------------------------------------------------------------------------------------------------------------------------------------------------------------------------------------------------------------------------------------------------------------------------------------------------------------------------------------------------------------------------------------------------------------------------------------------------|
| CrSMP2 | TAGGTTGAAGATGCTCTTAGAATTTAGATAAAATATAATACATTGTTTGTACACAGCCAGTGGGTGGAGG<br>TCCATA<br>CTCATAGATATCAAAAACACGTTCCATCAACTCCATTCCATTTATCCCTGTACGATTTTTTTAATACTTT<br>TTTTAAAAAATATATTAAACCGTTAAATTTAAAAATATAAATACTAGAGAATAATTTTCATATATAAACCC<br>ATCATTATCTTAACATAAATTGACATCATATTTTGGGTACAATGTTTTTTTATCTCTTTTTTTTTCTCTTTA<br>TATGTACGTAAGTCTTAAAGTTAAACACATCTCCAAAAATAAAGACAACAATACAAATTTCTCACTT<br>TAATTATAAATACAGTATTTACCATTCCGCATAGGTTACTTAAAGTAAGGTTTAATTTGTTTTTAATTT<br>TCATATTTTAGTCTATATATAATTTTAATTTATCTAGTATTTTTTAGTAATTCATAATCATCTAATTTTAAT<br>TTCTTATTTTCATTTTGTATTATTCAAATTAAGTTTCCATCCAAGTATTTCTTTTAAATAATTAATAGGAA<br>TTAACGAATATGTTATATGTCTATGTGTTATTTATGTTCTGTCAATAGTTGGAGTTATTACTTTAATTTGTATA<br>AAAAGTTATTTTTTTATAGATTTATAATATATATAATATTTAAATCAAATTTTTATATTCAAAATGTCC<br>ACAACACAAATATATTTTATATATTTTTGCTTATAGATAAACTTTTAGAGTTTAAAAATATCCTAATTTAA<br>ACAATAAAAAATATGAAAAATTTAAATAAATATAAATAATAGACTCAGTCATGATGGAACGCTTAAACG<br>ACATGTGCTTCGGTTTCTCAATCGAAGGTCAAAACCTCAACGGTAGAACACAAAACAAGTCTCTGTTTGT<br>GCGCCAAGTGTGCTGAGAAGCTTACCGTGTCTCTCCAATGTTAGCCACGTGTCAATTTCCCAACCATGC<br>ATTTACAATCTTAATCCTTCCATCCCATTAAAAAGTTCCCATCCACTTGAAAGCAGCATTATATTTTAA<br>TAAAAA |
|        | CATAAATTTTTTTCATTTTTCTTTTCTTTTTGAAACAATGAAATTTTATAAAAAAATAAAATGTAAATTTA<br>AACTTTTATATAAACTATTCAACTTCTACTATACTAACCTGATACTGATCTTAGATCATTTGCTTTTTTT<br>TTTTTTCAAATATGGCAAAATGATAACTCAAAAGAAAAATATAAAAGCATGGGTATTAATAATTTTT<br>ATCACCCCTCTCTAAAACGGATTTCGTAGACCTTTCTAGCTTAAATAATTTTGCATACATGTTTTCATTTCC<br>AGTGTACACATTATTTGTGATAATACATATCAAGCTTCTTTATTTGAACGAGTCTTAAACACAAACAACAAT<br>TTTAATTTTTTATACTCATATATTTATGTTTATTTATATATTTTTCCATCATCATCATCTCGTTACGTTT<br>ATATCCCCCCCCCTTTATGTCTTGAAGCTCTCAAAAGATATATACATTTTTTAGATACGACTGAAA<br>CATCTTCCAAAGGAAAAATGTGAGCGAAAACATACTACTGTGAAAAAGGCAATCAAATGGAAATGGGACAC<br>TAATTTATTTTATCATTTTTTTTTCACGAAGGTATAGAAATATCGGGAATATCTTAATGGCATTGTCTATTGAC<br>ACCGCCAAATATATTAGAGAAATAAGTTTAAATTTTGTATTTATTTAATAAATATATATATATATATTT<br>AAATTTTTTATAAAAAAATAAATTTAATAATGATATAAATATATATTTTATATAATTTTGGAGTGTCTCTTAT<br>ATTTATTTATTTTTGTTTTTGAATAGTATTATATTTATTTTGTATCCCTTAACCGAAAAATGGTGTA<br>ACAATAATTGTAAGGATTGGTATTTGGATATTTTTGTTGAAAAAGGAAAAAGAGCTAGATGGTTGTGAA<br>ATGAGCATGCCACGTCCCTGGTACCACCTTGTGTTGTTGCCAAGTGTAACGCTTGGCCACGTATTCTCCCG<br>TTCCCA                                                                                      |
| CrSMP3 | TTATTTATTCATTTGAAATCAGTGAATACTTGGCAACGCAAAACCATTGGAAAAATGACAATTGAGCATCT<br>TCTAGATATTTCCAACAAGACAAAATCGTCAATTTAAACCTTGAGAAAAATCAACCACTGCGAAATGACTTAA<br>ACTGGTTCCGCCAAACTTTACTCCCAATTCATCCATTAAACAAATTAAGATCAGAGCAATACAATAAAT<br>TAATCTCTAAATCATAAATATTAATTAATTAAGTCTTTAAATTTATAAAAAATAAATTTCTTTAAATTA<br>AATATTTTATATTTAATAATTTTAAAAATTAATAATATTTTATAATTTTAAATTAATTAACCTTATA<br>TTTCTAATTTTAGTGACTAATTTATTAATTTATTTATATATATATATATATAATAAGTTAAATTTGT<br>TGATTTTGTAGCATTTACATTAATTTAATAATTTTATATAAAATATAAAATTAATTTAAATTTTATAATA<br>TTTAATAAATTTATATATAAATTTTATATAAATAAATAAATAAATTAATAAATTTAATGATTTATATTTAAAT<br>ATATATATATATATAAATATTAATAATTTGAATAAACTATCATTTTTTAAAAAAATTTAAATTTAATATACAT<br>AATTTATCAAATATTATAATATTATACACGGTTAATAATTTATTAATAAATTTTATATTTATATAAAT<br>ATTAATTAATATAAGTATCTATAATTTAACAATCTTCTATTATTTGATTTTCTCTAGCTGAGAAGACGTA<br>CGTTTTCGACCCGTAAGTGAATATATTTTATTTATATTTTACATTTATTTTATTTTATCAGTATCCTTC<br>TTTTTGAATGGTACAACCAGAAGCCAGATGTATGATCAAAGTGATCTACACTTCATAACAGTGTCTCCTG<br>AGGTGGACTTAGAACGAAATGCCACCTTACCTTTTGTCTGTGCACAAACAACAGTGTCTGTCATGCACC<br>ATCCAA                                                                                          |
| CrSMP4 | AGAAGACACAGACGAAAACAAATGTGTATTATATTATATTATATAAAATTTATAATAATATCTCTAGA<br>TTAAATCTATTTAATTTATTTAAATCTAATTTCTTAAGACGCATATGTTATTACTTATTTTCATATTAAATA<br>TTTTTATTAATGAGTTTGCATATAAAATCAATACTATTTTAAATAAGATTAAATACATTAATTTTATTT<br>ATCTATAAAAAACAAATTTGATAAATTAATGGATTGTAATAGTTTAAATAAATAATTTTATATTTAAAAAT<br>TTTTAAAAATAAAGTTGACTAAATTTGTAATAATTATAAATAAATAAATAAATTAACCTTTTAAATGGGTAACTTTTA<br>ATGGTGACATTGTCGTTTTTTTTTAAATAGATAAAAAATAATTATTTTTTAAACATTTTATACCTGTTGTTACAA<br>AGAATTAATAATAATTTTTCTTTTAAATTTTAAAAACATTTTTTAAATTTTACATGATTTATCATAA<br>ATTTTTTAAAAACTAAAAATCATGGTCACCTTTCTTTCAATAATAGGAGAAAAAGGAGTAGCAAAATTTGTAT<br>TTTTAAATTTATATAAATAATTTTATAGAATATATTTTTTTATTTATATATCTTATTCATATTTATTATATA<br>TTTTATATTGCACCTTTTTTTATTTTTTGTGTTTCTTATAATATATTATAACAATCTTTTGATACGGAATTA<br>TAGATTTTTATTAAAGATAATTTTATTTAAATAAATAAATTTAATTTAATAAATTTAACTTTCTTTAAGATT<br>CAAAGCAAATGTATATTCACAAAAATTTGGAACCGTTTCTTTCAAGTACAAGTAGAAATGTTTTTGCAAAG<br>AAATTAACACACAAAAGTATGTGGAGGACCTATATTTTGTATCTTCCAGGAGATCATTTAAAGCCTACCA<br>AAAAAGCAGAACTTAATCAGCATGTCTAACATGATCATCACTTTATAATAAAGAACAAATATATTCATAT<br>ATTTCA                                                                    |
| CrASR1 | AATAATGTTATAAATTAAGAAGCCAAATTTTATCTGTAAAAACAAATAATAATTTAATAGTCGCATAAAAATA<br>CTTTTGGGAAACTACCTTGCTCGTGCGATTAGCCTCCAAGGAAGTCAACACATAAGTATTTCCCTAGTTTA<br>GGTGACTTCCAGTTCCAAACTACACTCGATCGTAACCTTTTAATTTCCACCATTATCTTAGTATAGAAGAAAC<br>CAATTTTTTATAAGAATTCGTGTCTTTCAAAAAATATAAGAAATTAACAACAACTCCAGCATAGCAATTAC<br>ATAAATAATATGTTTTTTTAAATATACTGATAGGGATTAAATTTGAATTATATATATATATATAAATTTAT<br>ATGAAATAGTAAATTTAATTTAATAATTTTATATTTTAAAGAACTAATCTTTAACTATGCAAAATAAT<br>TGATGTTGATAAAAAAATTTGAATAAATAAATATGTTAAATGTACAAAAACAATAACCATCAAAATTTTC<br>AGAATGTGTTATTTTATTATTACTCAATTTTCTTAATATAAGACAGAGTGATATTTTGCAAAAAGAAA<br>AATATAAAGCATTTATAGTAAGAAAGTCATTATATATGTAAAGTTTATGAATATTTTTGTTAAAAATTACA<br>TTCACATCCTCTTAAATTTATAAAAAAATAAAGTATTCGGTGTTTTTTCTGTGTTATTTATCTGCACATA<br>ACACTGTATATATTTTTTCCAATTTATAAACTCTGTCAACACTTTCATAATTTCTTATCATATTACATCTAT<br>AAAAAAATACCATATATTTTTTCAATAAATTTTGAAGATGTTAACATAATTTATTTTTTCTATTTTAA<br>TATTATAGAAACCTAATATTTTTTCTCCATTTTAAATATTCTTTGAATTTGGGCATTGAATCATTTCTTGGGAA<br>TTTCCATGAGACTTTTCCACATACCGGCAACAATACATTCTTTATCACCTATAAGTAGCTTAATTTCAAT                                                                                        |
| CrASR2 |                                                                                                                                                                                                                                                                                                                                                                                                                                                                                                                                                                                                                                                                                                                                                                                                                                                                                                                                                                                                                                                                                                                                                                           |



|        |                                                                                                                                                                                                                                                                                                                                                                                                                                                                                                                                                                                                                                                                                                                                                                                                                                                                                                                                                                                                                                                                                   |  |  |
|--------|-----------------------------------------------------------------------------------------------------------------------------------------------------------------------------------------------------------------------------------------------------------------------------------------------------------------------------------------------------------------------------------------------------------------------------------------------------------------------------------------------------------------------------------------------------------------------------------------------------------------------------------------------------------------------------------------------------------------------------------------------------------------------------------------------------------------------------------------------------------------------------------------------------------------------------------------------------------------------------------------------------------------------------------------------------------------------------------|--|--|
| CrASR3 | CACAGA                                                                                                                                                                                                                                                                                                                                                                                                                                                                                                                                                                                                                                                                                                                                                                                                                                                                                                                                                                                                                                                                            |  |  |
|        | ATTATTTAATACAATAAAGTGATTAATAAACAAAGAAACAACAAGAAAGAGAAGTTTGTGATAAAATGATG<br>GATAGAATAGAGAGAACTAGAAAAGAAAAATAATGCTATATAAAATATTTGTATAAAAGTTATGTAGGAATA<br>ATATAATTTATAATTTTATATTTAAAAATAATTTTTATTCAAGAGTAGTTAATCTTGAAAAGTGATCAA<br>AGAACATATTTGGGTTATATTCTAAAAATCAAACTGGTAGCAAAACACTCTTTTGAATATATTATATATTT<br>AACATACTTTTTTATAATAGATTTTTTTGTCTTGATCAATAGTCTCTTAGGATACTCGTAAAAAAATTA<br>AAATGAGAAATTTTATTAATAATAAATTTGAAATATATAAAATCATGGCACTGTAAATTTAATAATATTT<br>TTTTATTTTTTAAAAATCAAAACATTTTATACAAATTAATCATTTTACAAATAAAATATTTCAACTTTTT<br>AAAAAATAAATCAATAATAAAAAATATATTTAAAAAGAGTGTCTTAGTCCTTACATTTCTGGTTCTGAAAT<br>GTAAAAATCTAAACCCACTCGGTACTCCTGTACACATATCATGATCTCTGCTTCCATGTGCTCCATTTGTT<br>CAGTGAAAAGGCTTCTTACTGTAGCCAGTGGCCAGCCCATGAAAAATCGTCATTGATACCCACTGTA<br>ATGGAGATTTTTTCTCATCTCCATGTATCTTTACTTAATTGGGTAACAAAACAATCCATTAATTAATTT<br>TCTTAATTTATATTTTATAAACTCCTAAATACTATTACTCCAAAGTTAAAAATTAATGAATATACAAAA<br>CATAATGATATTTAGGGGACCATATTTATAAATCTTTCATAAAATCATTTATCATGGCCACCAAGAAAG<br>CTGCACCTAACCAACCAATTACTCATGGTTAACATAATCATCAATTTATAAATAGGTTACCTAAGCTTCCC<br>AATTCT |  |  |

**Table S3.** The conserved motifs of the CrLEA proteins.

| Group   | Motif | E-value  | Consensus sequence                                                                                                                      |
|---------|-------|----------|-----------------------------------------------------------------------------------------------------------------------------------------|
| CrLEA_1 | 1     | 3.0e-032 | <br>EKMSAHDEIQKEIATRKKEERINQAELEKQAREYNAAKQSAMAGHMSQ  |
|         | 2     | 1.3e-016 | <br>PDTATHPIGEYAQPMGITPMGVVGSNPSGTNTGVDS TAPMSGHNF    |
|         | 3     | 8.5e-010 | <br>NSGPGTETADLTIGSRPETATYSTTGPGEIPTTYSTTGPGIETAIFF |
| CrLEA_2 | 1     | 1.0e-113 | <br>VTLDLTVTARNPN                                    |
|         | 2     | 2.2e-167 | <br>RPKKPKFSVTSVTLTQFNLTSPN                         |
|         | 3     | 7.9e-193 | <br>GGIYDSSTVS VFYRGQQIGSGSJPPF                     |
| CrLEA_3 | 1     | 7.5e-034 | <br>WVPDPVTGYYPENH                                   |
|         | 2     | 9.8e-014 | <br>EIDAELRQTLNKK                                    |
|         | 3     | 4.5e-006 | <br>TRRGYAVASDSATRGGIASI                            |
| CrLEA_4 | 1     | 1.9e-004 | <br>QRQCDZZKRGVIGSMFR                                |

|         |   |          |                                                                                                                                           |
|---------|---|----------|-------------------------------------------------------------------------------------------------------------------------------------------|
|         | 2 | 4.4e-003 | <br>FNDVGRLEEGVINVER                                     |
|         | 3 | 3.6e-001 | <br>PYTLEVDIHF                                           |
|         | 1 | 6.7e-007 | <br>QTRKEQLGTEGYKEMGRKGGLSMDKSGGERAEEGIDIDESKF          |
| CrLEA_5 | 2 | 1.2e-004 | <br>MASKQQRZELDEKAKQGETVVPGGTGGKSLEAQZNLA               |
|         | 3 | 1.2e+001 | <br>FTCVRN                                               |
| CrLEA_6 | 1 | 6.6e-002 | <br>YKRNGYGTQGHQZPKPNQ                                  |
|         | 2 | 1.2e-001 | <br>GLPLEDSPCLKYKDV                                     |
|         | 3 | 6.2e+001 | <br>GSQHIA                                             |
| CrDHN   | 1 | 3.6e-017 | <br>QHEKKGILEKIKEKLPGYH                               |
|         | 2 | 2.6e-007 | <br>HSLLEKLHRSBSSSSSSS                                 |
|         | 3 | 5.3e-007 | <br>MANYQBQYGDPPRSTDQYGNPV                            |
| CrSMP   | 1 | 1.1e-026 | <br>LNARTPRDQDKTKLADVLTDATEKLPSDKAVTREDAEGVIAAEMRNDPD |
|         | 2 | 3.1e-013 | <br>GDKPVDQSDAAAIQAAEVRATGKNNIVPGGLGAAQAS             |
|         | 3 | 1.3e-011 | <br>PRQEPICYGDVFDVSGELASKPVAPZDAAMMQAAETGVLGQ         |

|       |   |          |                                                                                                                                                                                         |
|-------|---|----------|-----------------------------------------------------------------------------------------------------------------------------------------------------------------------------------------|
| CrASR | 1 | 2.0e-018 | <br>L G E L G A A A A G A Y A L H E K H K A G K D P E H A H R H K T E E E I A A A A A V G A G G F A F |
|       | 2 | 5.4e-002 | <br>L F H H H K D E D K P I E T                                                                        |
|       | 3 | 6.5e-001 | <br>D D V D Y K K E E K H H K H L                                                                      |

**Table S4.** The *cis*-regulatory elements identified in promoter regions of *CrLEAs* and *CrASRs*.

|           | light<br>responsive<br>element | gibberelli<br>n-respons<br>ive<br>element | MeJA-r<br>esponsi<br>veness<br>element | auxin-r<br>esponsi<br>ve<br>elemen<br>t | salicylic<br>acid<br>responsi<br>veness | AB<br>RE | E<br>R<br>E | M<br>Y<br>C | M<br>Y<br>B | M<br>B<br>S | TC-r<br>ich<br>repe<br>ats | LT<br>R | as-<br>l |
|-----------|--------------------------------|-------------------------------------------|----------------------------------------|-----------------------------------------|-----------------------------------------|----------|-------------|-------------|-------------|-------------|----------------------------|---------|----------|
| CrDHN1    | 6                              | 0                                         | 2                                      | 1                                       | 0                                       | 3        | 0           | 3           | 2           | 0           | 0                          | 0       | 1        |
| CrDHN2    | 7                              | 0                                         | 0                                      | 2                                       | 0                                       | 2        | 0           | 1           | 0           | 0           | 0                          | 0       | 0        |
| CrDHN3    | 10                             | 0                                         | 0                                      | 1                                       | 1                                       | 4        | 4           | 1           | 1           | 1           | 0                          | 0       | 0        |
| CrDHN4    | 10                             | 0                                         | 4                                      | 1                                       | 1                                       | 1        | 1           | 2           | 1           | 0           | 0                          | 0       | 2        |
| CrDHN5    | 28                             | 0                                         | 0                                      | 1                                       | 0                                       | 10       | 1           | 3           | 3           | 1           | 0                          | 1       | 0        |
| CrASR1    | 9                              | 1                                         | 0                                      | 1                                       | 0                                       | 0        | 4           | 3           | 2           | 0           | 0                          | 0       | 0        |
| CrASR2    | 4                              | 0                                         | 0                                      | 0                                       | 0                                       | 0        | 0           | 0           | 0           | 0           | 0                          | 0       | 0        |
| CrASR3    | 10                             | 0                                         | 2                                      | 0                                       | 1                                       | 0        | 0           | 2           | 3           | 0           | 0                          | 0       | 1        |
| CrLEA1-1  | 9                              | 0                                         | 2                                      | 1                                       | 1                                       | 8        | 0           | 1           | 2           | 0           | 0                          | 1       | 1        |
| CrLEA1-2  | 3                              | 0                                         | 2                                      | 0                                       | 0                                       | 0        | 1           | 3           | 1           | 0           | 0                          | 0       | 1        |
| CrLEA1-3  | 6                              | 0                                         | 0                                      | 0                                       | 1                                       | 1        | 5           | 0           | 0           | 1           | 0                          | 0       | 0        |
| CrLEA2-1  | 11                             | 1                                         | 0                                      | 0                                       | 0                                       | 1        | 3           | 1           | 2           | 2           | 0                          | 0       | 0        |
| CrLEA2-2  | 6                              | 0                                         | 0                                      | 1                                       | 0                                       | 0        | 0           | 0           | 0           | 0           | 0                          | 0       | 0        |
| CrLEA2-3  | 4                              | 1                                         | 2                                      | 0                                       | 1                                       | 2        | 0           | 4           | 4           | 0           | 0                          | 0       | 1        |
| CrLEA2-4  | 3                              | 0                                         | 2                                      | 0                                       | 0                                       | 0        | 0           | 3           | 3           | 0           | 0                          | 1       | 1        |
| CrLEA2-5  | 3                              | 2                                         | 2                                      | 0                                       | 0                                       | 0        | 0           | 3           | 0           | 1           | 0                          | 0       | 1        |
| CrLEA2-6  | 6                              | 0                                         | 2                                      | 0                                       | 0                                       | 1        | 0           | 2           | 1           | 0           | 0                          | 0       | 1        |
| CrLEA2-7  | 8                              | 0                                         | 2                                      | 0                                       | 1                                       | 1        | 3           | 0           | 2           | 0           | 0                          | 1       | 1        |
| CrLEA2-8  | 4                              | 1                                         | 0                                      | 0                                       | 0                                       | 0        | 0           | 0           | 1           | 1           | 2                          | 0       | 0        |
| CrLEA2-9  | 14                             | 0                                         | 0                                      | 0                                       | 0                                       | 1        | 3           | 2           | 0           | 0           | 0                          | 0       | 0        |
| CrLEA2-10 | 10                             | 1                                         | 0                                      | 0                                       | 0                                       | 0        | 4           | 0           | 0           | 0           | 0                          | 0       | 0        |
| CrLEA2-11 | 11                             | 0                                         | 0                                      | 0                                       | 0                                       | 0        | 1           | 0           | 2           | 0           | 1                          | 0       | 0        |
| CrLEA2-12 | 6                              | 0                                         | 4                                      | 1                                       | 0                                       | 1        | 1           | 1           | 3           | 0           | 0                          | 0       | 2        |
| CrLEA2-13 | 2                              | 1                                         | 0                                      | 0                                       | 0                                       | 0        | 1           | 2           | 3           | 2           | 0                          | 1       | 0        |
| CrLEA2-14 | 4                              | 1                                         | 0                                      | 0                                       | 0                                       | 0        | 2           | 2           | 2           | 0           | 0                          | 0       | 0        |
| CrLEA2-15 | 9                              | 0                                         | 2                                      | 0                                       | 2                                       | 1        | 3           | 1           | 2           | 0           | 0                          | 0       | 1        |
| CrLEA2-16 | 8                              | 1                                         | 0                                      | 0                                       | 0                                       | 3        | 0           | 2           | 2           | 0           | 0                          | 0       | 0        |
| CrLEA2-17 | 7                              | 0                                         | 0                                      | 1                                       | 1                                       | 0        | 1           | 1           | 2           | 0           | 0                          | 2       | 0        |
| CrLEA2-18 | 11                             | 1                                         | 0                                      | 0                                       | 0                                       | 1        | 1           | 0           | 0           | 1           | 0                          | 1       | 0        |
| CrLEA2-19 | 6                              | 0                                         | 0                                      | 0                                       | 1                                       | 0        | 0           | 3           | 5           | 1           | 0                          | 1       | 0        |
| CrLEA2-20 | 4                              | 0                                         | 0                                      | 0                                       | 0                                       | 1        | 1           | 1           | 1           | 0           | 0                          | 0       | 0        |
| CrLEA2-21 | 9                              | 1                                         | 0                                      | 1                                       | 0                                       | 0        | 7           | 1           | 0           | 0           | 1                          | 0       | 0        |

|           |    |   |   |   |   |   |   |   |   |   |   |   |   |
|-----------|----|---|---|---|---|---|---|---|---|---|---|---|---|
| CrLEA2-22 | 3  | 0 | 0 | 1 | 0 | 0 | 0 | 2 | 1 | 2 | 0 | 1 | 0 |
| CrLEA2-23 | 8  | 0 | 8 | 0 | 0 | 2 | 2 | 3 | 1 | 0 | 1 | 0 | 4 |
| CrLEA2-24 | 10 | 0 | 2 | 0 | 0 | 3 | 0 | 0 | 2 | 1 | 1 | 1 | 1 |
| CrLEA2-25 | 4  | 1 | 4 | 0 | 0 | 0 | 0 | 1 | 1 | 0 | 0 | 1 | 2 |
| CrLEA2-26 | 8  | 1 | 2 | 0 | 0 | 0 | 0 | 0 | 3 | 0 | 0 | 0 | 1 |
| CrLEA2-27 | 12 | 1 | 0 | 0 | 0 | 1 | 7 | 0 | 2 | 0 | 0 | 1 | 0 |
| CrLEA2-28 | 10 | 0 | 2 | 1 | 0 | 0 | 3 | 0 | 2 | 0 | 0 | 0 | 1 |
| CrLEA2-29 | 11 | 1 | 4 | 0 | 0 | 1 | 0 | 0 | 4 | 0 | 0 | 0 | 2 |
| CrLEA2-30 | 8  | 1 | 0 | 0 | 0 | 1 | 0 | 2 | 2 | 0 | 1 | 0 | 0 |
| CrLEA2-31 | 7  | 0 | 2 | 0 | 0 | 0 | 1 | 1 | 0 | 0 | 0 | 0 | 1 |
| CrLEA2-32 | 5  | 1 | 0 | 1 | 1 | 0 | 1 | 1 | 1 | 1 | 0 | 0 | 0 |
| CrLEA2-33 | 6  | 0 | 2 | 0 | 1 | 1 | 2 | 3 | 1 | 0 | 0 | 0 | 1 |
| CrLEA2-34 | 7  | 0 | 0 | 0 | 0 | 0 | 0 | 0 | 0 | 0 | 0 | 0 | 0 |
| CrLEA2-35 | 4  | 0 | 0 | 0 | 0 | 0 | 1 | 1 | 1 | 0 | 0 | 0 | 0 |
| CrLEA2-36 | 12 | 0 | 0 | 0 | 0 | 1 | 2 | 0 | 0 | 0 | 0 | 0 | 0 |
| CrLEA2-37 | 2  | 1 | 0 | 1 | 1 | 0 | 6 | 0 | 0 | 0 | 1 | 0 | 0 |
| CrLEA2-38 | 11 | 0 | 0 | 0 | 0 | 0 | 2 | 1 | 0 | 2 | 0 | 0 | 0 |
| CrLEA2-39 | 13 | 0 | 0 | 0 | 0 | 1 | 2 | 1 | 1 | 0 | 1 | 1 | 0 |
| CrLEA2-40 | 3  | 0 | 1 | 1 | 0 | 1 | 3 | 3 | 2 | 1 | 0 | 0 | 1 |
| CrLEA2-41 | 4  | 0 | 0 | 0 | 0 | 0 | 8 | 1 | 0 | 0 | 1 | 0 | 0 |
| CrLEA2-42 | 6  | 1 | 0 | 0 | 0 | 1 | 0 | 1 | 2 | 0 | 2 | 1 | 0 |
| CrLEA2-43 | 11 | 0 | 0 | 0 | 0 | 0 | 2 | 1 | 2 | 0 | 0 | 0 | 0 |
| CrLEA2-44 | 6  | 0 | 0 | 1 | 0 | 1 | 6 | 2 | 0 | 1 | 0 | 0 | 0 |
| CrLEA2-45 | 11 | 0 | 0 | 0 | 0 | 0 | 0 | 0 | 4 | 0 | 0 | 0 | 0 |
| CrLEA2-46 | 7  | 0 | 0 | 0 | 0 | 1 | 1 | 2 | 3 | 0 | 1 | 0 | 0 |
| CrLEA2-47 | 5  | 1 | 2 | 0 | 1 | 1 | 2 | 3 | 4 | 0 | 1 | 0 | 1 |
| CrLEA2-48 | 8  | 0 | 0 | 0 | 0 | 1 | 0 | 0 | 0 | 0 | 0 | 0 | 0 |
| CrLEA2-49 | 3  | 0 | 0 | 0 | 1 | 1 | 0 | 1 | 2 | 0 | 0 | 0 | 0 |
| CrLEA2-50 | 7  | 1 | 2 | 0 | 0 | 2 | 3 | 9 | 1 | 0 | 0 | 0 | 1 |
| CrLEA2-51 | 5  | 0 | 0 | 0 | 0 | 1 | 2 | 5 | 1 | 0 | 1 | 1 | 0 |
| CrLEA2-52 | 5  | 0 | 0 | 0 | 0 | 1 | 2 | 1 | 1 | 0 | 1 | 1 | 0 |
| CrLEA2-53 | 11 | 0 | 0 | 0 | 0 | 1 | 3 | 3 | 3 | 0 | 0 | 1 | 0 |
| CrLEA2-54 | 4  | 0 | 0 | 0 | 0 | 0 | 0 | 4 | 0 | 0 | 0 | 1 | 0 |
| CrLEA2-55 | 3  | 0 | 4 | 0 | 0 | 2 | 2 | 1 | 2 | 0 | 1 | 0 | 2 |
| CrLEA2-56 | 7  | 1 | 2 | 1 | 0 | 0 | 1 | 1 | 0 | 0 | 1 | 0 | 1 |
| CrLEA2-57 | 9  | 0 | 0 | 0 | 0 | 1 | 0 | 0 | 1 | 0 | 0 | 0 | 0 |
| CrLEA2-58 | 11 | 0 | 4 | 0 | 1 | 0 | 1 | 2 | 1 | 1 | 0 | 0 | 2 |
| CrLEA2-59 | 12 | 0 | 4 | 0 | 1 | 0 | 1 | 2 | 1 | 2 | 0 | 0 | 2 |
| CrLEA2-60 | 4  | 1 | 4 | 1 | 0 | 0 | 1 | 1 | 0 | 0 | 0 | 0 | 2 |
| CrLEA3-1  | 10 | 0 | 4 | 2 | 0 | 2 | 4 | 2 | 1 | 1 | 1 | 0 | 2 |
| CrLEA3-2  | 7  | 0 | 0 | 1 | 0 | 0 | 0 | 2 | 2 | 0 | 0 | 0 | 0 |
| CrLEA3-3  | 8  | 0 | 2 | 0 | 0 | 0 | 1 | 3 | 0 | 0 | 0 | 0 | 1 |
| CrLEA3-4  | 4  | 1 | 2 | 0 | 0 | 0 | 1 | 1 | 4 | 0 | 1 | 0 | 1 |
| CrLEA3-5  | 4  | 0 | 0 | 0 | 0 | 0 | 0 | 4 | 1 | 0 | 0 | 0 | 0 |
| CrLEA3-6  | 2  | 0 | 0 | 0 | 1 | 0 | 3 | 1 | 1 | 0 | 0 | 0 | 0 |
| CrLEA4-1  | 11 | 1 | 0 | 0 | 0 | 5 | 4 | 0 | 2 | 0 | 0 | 0 | 0 |

|          |    |   |   |   |   |   |   |   |   |   |   |   |   |
|----------|----|---|---|---|---|---|---|---|---|---|---|---|---|
| CrLEA4-2 | 5  | 0 | 4 | 0 | 0 | 1 | 1 | 3 | 3 | 0 | 1 | 0 | 2 |
| CrLEA5-1 | 18 | 0 | 0 | 1 | 0 | 8 | 0 | 1 | 1 | 0 | 0 | 0 | 0 |
| CrLEA5-2 | 19 | 1 | 0 | 0 | 2 | 4 | 0 | 1 | 2 | 0 | 0 | 0 | 0 |
| CrLEA6-1 | 14 | 0 | 4 | 0 | 0 | 2 | 2 | 1 | 0 | 0 | 0 | 0 | 2 |
| CrLEA6-2 | 11 | 0 | 2 | 0 | 0 | 6 | 0 | 3 | 0 | 1 | 0 | 0 | 1 |
| CrSMP1   | 5  | 0 | 0 | 1 | 0 | 0 | 1 | 2 | 0 | 0 | 0 | 0 | 0 |
| CrSMP2   | 10 | 1 | 0 | 1 | 0 | 4 | 2 | 3 | 2 | 0 | 0 | 0 | 0 |
| CrSMP3   | 5  | 0 | 0 | 0 | 0 | 2 | 0 | 2 | 1 | 0 | 0 | 1 | 0 |
| CrSMP4   | 13 | 1 | 2 | 0 | 1 | 3 | 4 | 2 | 3 | 0 | 0 | 0 | 1 |

**Table S5.** The numbers of subfamilies of *LEA/ASR* genes in different legume species.

| Species                    | Total No. | The No. of LEA/ASR members in each subfamily |       |       |       |       |       |     |     |     |
|----------------------------|-----------|----------------------------------------------|-------|-------|-------|-------|-------|-----|-----|-----|
|                            |           | LEA_1                                        | LEA_2 | LEA_3 | LEA_4 | LEA_5 | LEA_6 | DHN | SMP | ASR |
| <i>Canavalia rosea</i>     | 87        | 3                                            | 60    | 6     | 2     | 2     | 2     | 5   | 4   | 3   |
| <i>Phaseolus vulgaris</i>  | 82        | 5                                            | 55    | 8     | 2     | 2     | 1     | 3   | 4   | 2   |
| <i>Glycine max</i>         | 149       | 7                                            | 105   | 11    | 3     | 5     | 2     | 7   | 6   | 3   |
| <i>Medicago truncatula</i> | 103       | 6                                            | 72    | 6     | 2     | 2     | 2     | 4   | 6   | 3   |
| <i>Cicer arietinum</i>     | 72        | 5                                            | 47    | 4     | 2     | 2     | 2     | 2   | 4   | 4   |

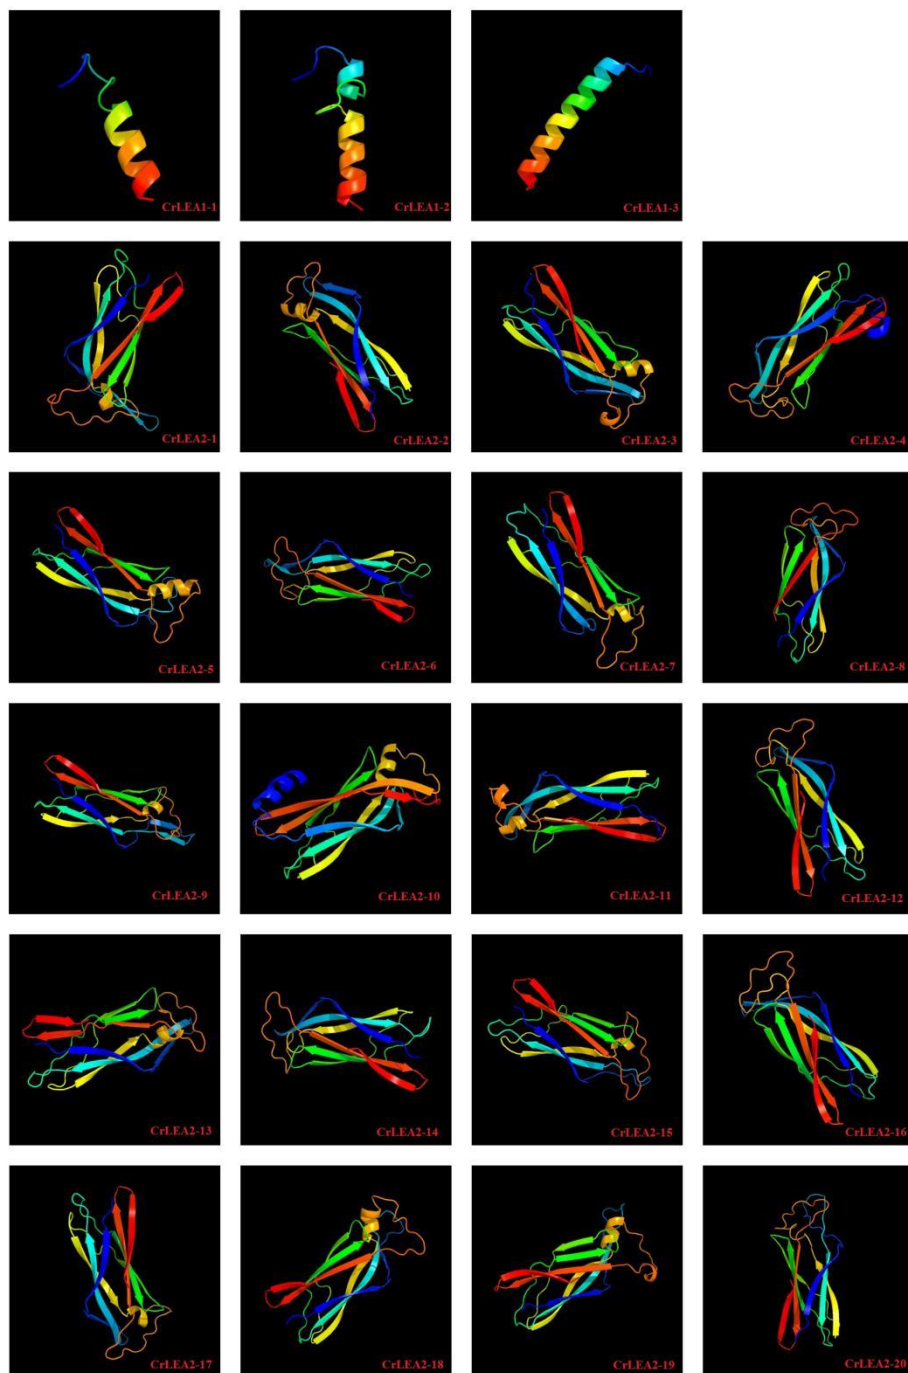

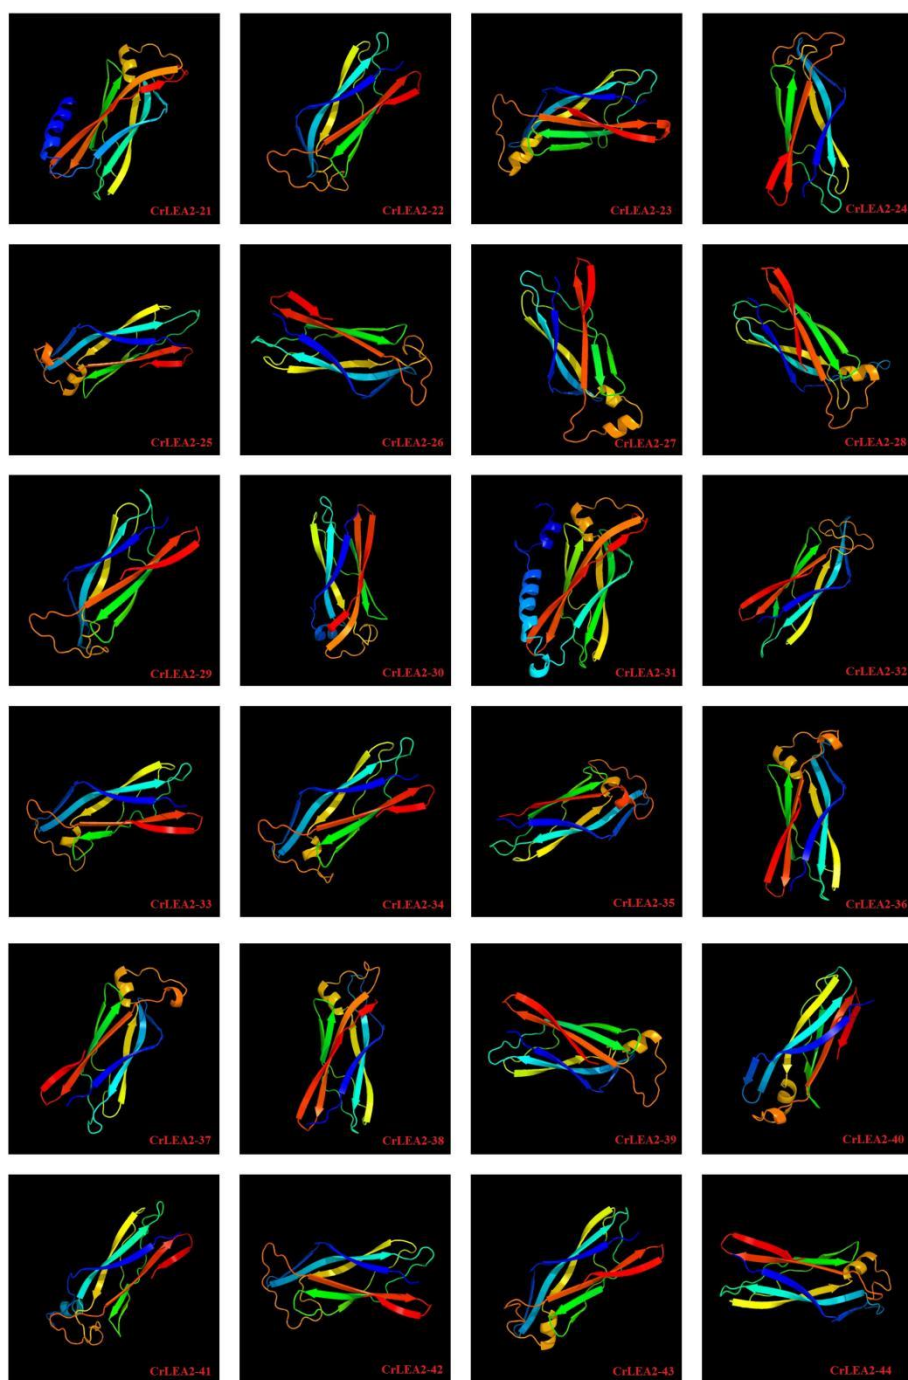

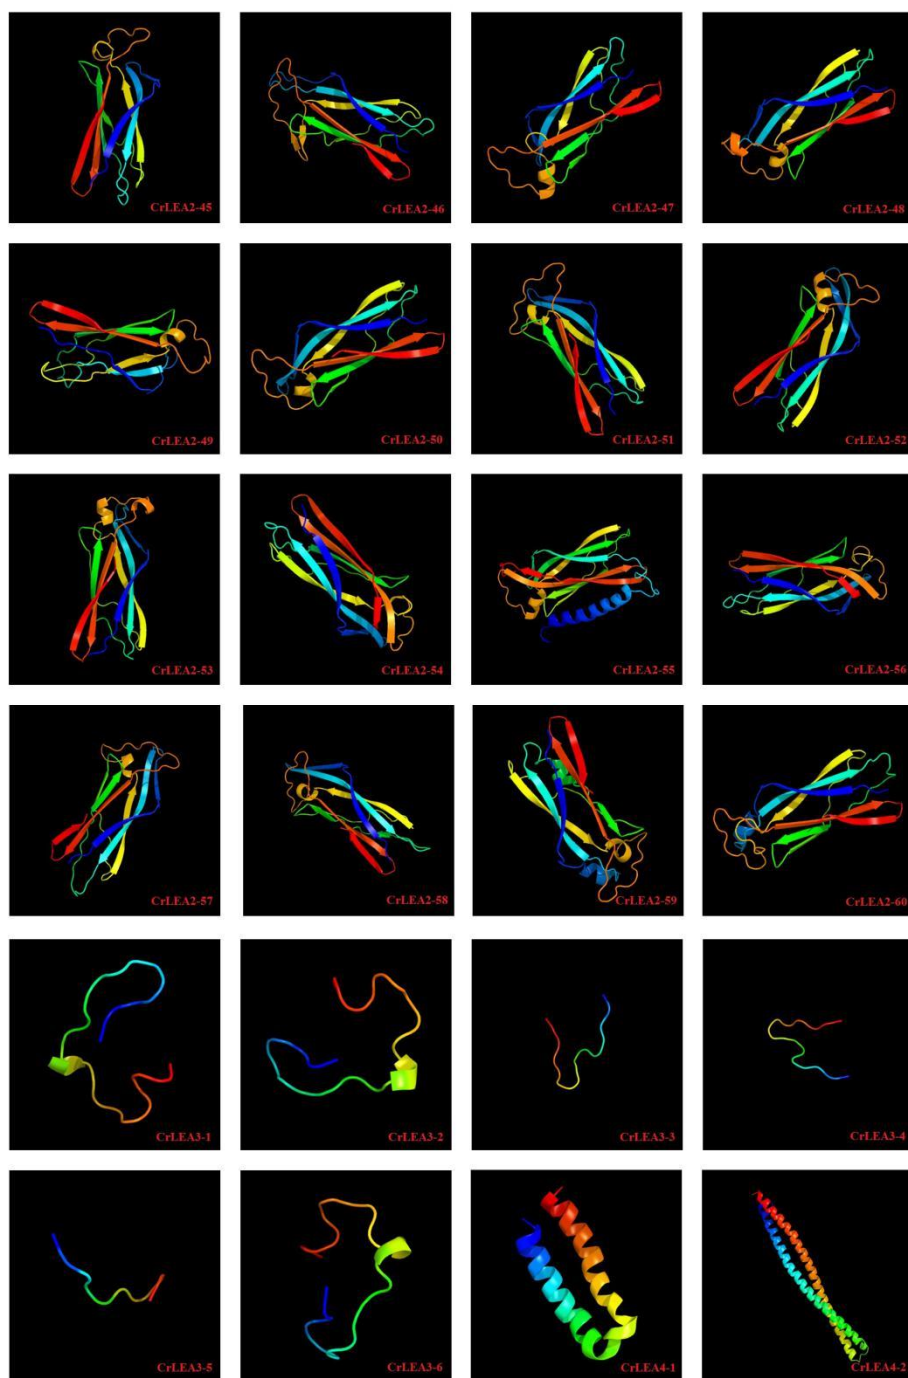



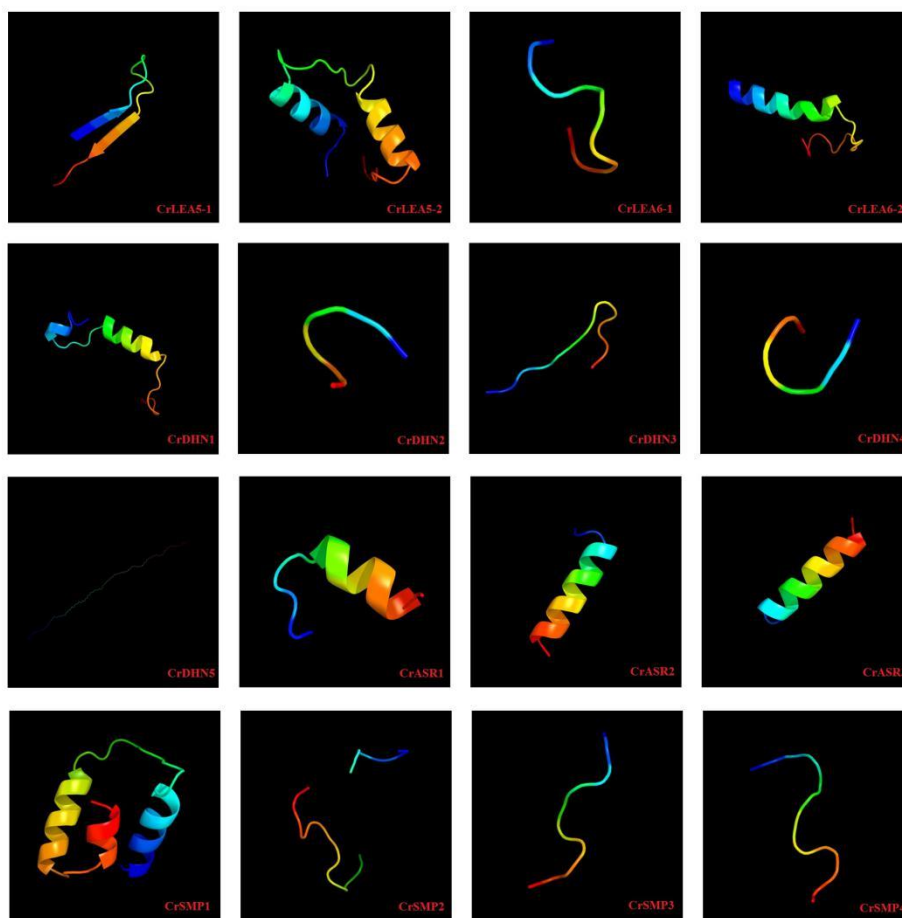

**Figure S1.** Predicted 3D models of CrLEA and CrASR proteins.

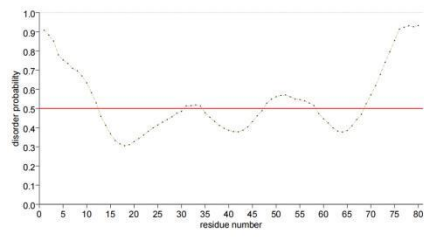

**CrDHN1**

- Prediction  
- Threshold  
(FP rate= 5.0%)

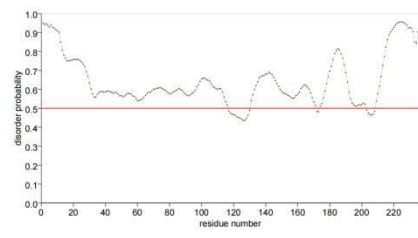

**CrASR1**

- Prediction  
- Threshold  
(FP rate= 5.0%)

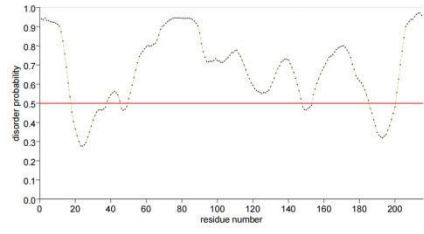

**CrDHN2**

- Prediction  
- Threshold  
(FP rate= 5.0%)

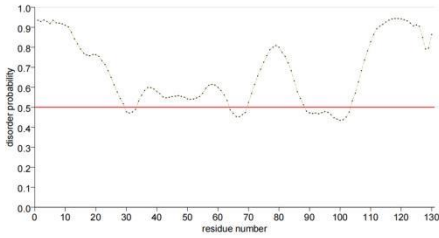

**CrASR2**

- Prediction  
- Threshold  
(FP rate= 5.0%)

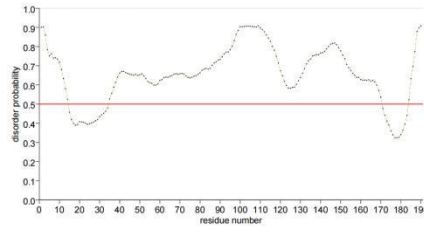

**CrDHN3**

- Prediction  
- Threshold  
(FP rate= 5.0%)

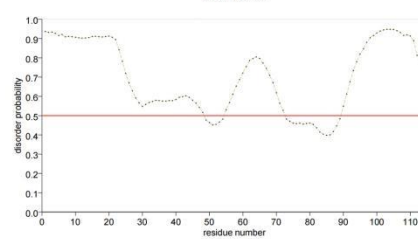

**CrASR3**

- Prediction  
- Threshold  
(FP rate= 5.0%)

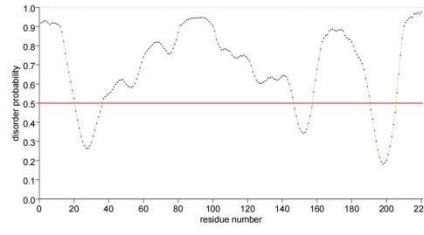

**CrDHN4**

- Prediction  
- Threshold  
(FP rate= 5.0%)

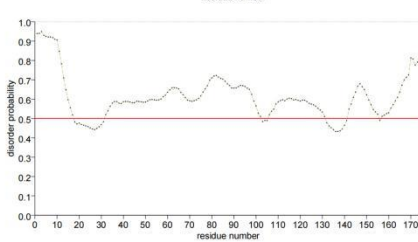

**CrLEA1-1**

- Prediction  
- Threshold  
(FP rate= 5.0%)

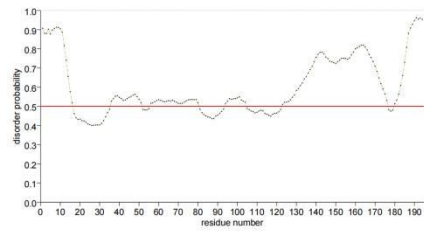

**CrDHN5**

- Prediction  
- Threshold  
(FP rate= 5.0%)

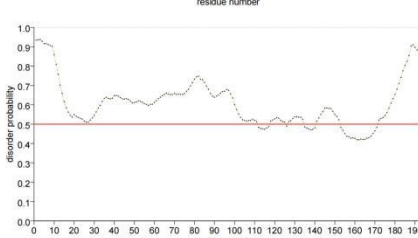

**CrLEA1-2**

- Prediction  
- Threshold  
(FP rate= 5.0%)

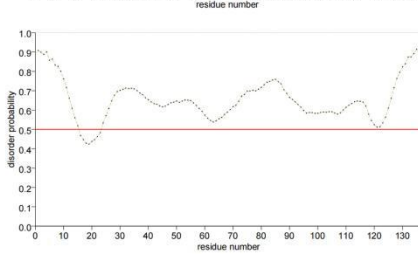

**CrLEA1-3**

- Prediction  
- Threshold  
(FP rate= 5.0%)

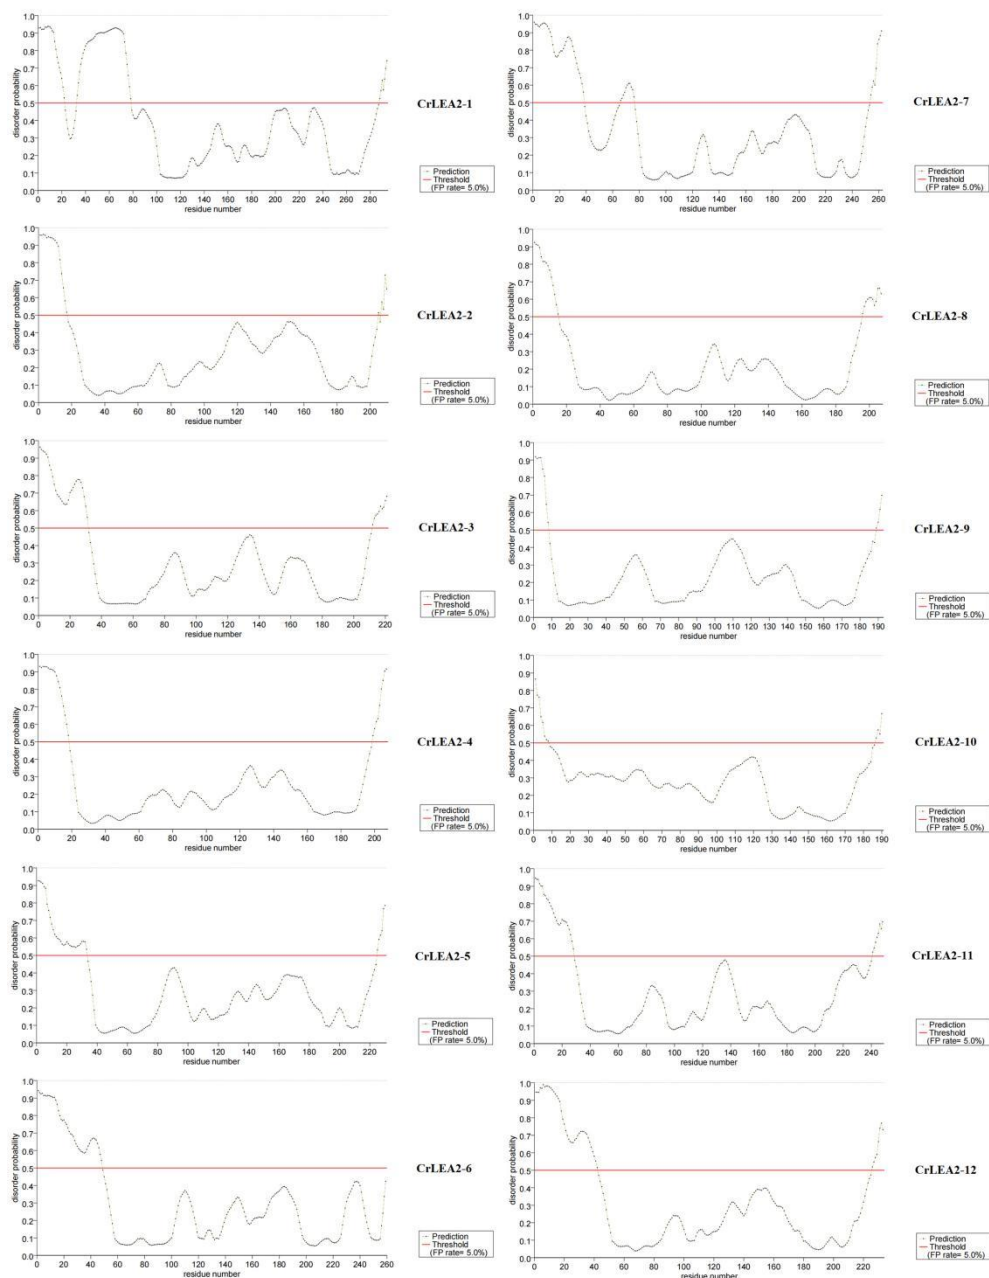

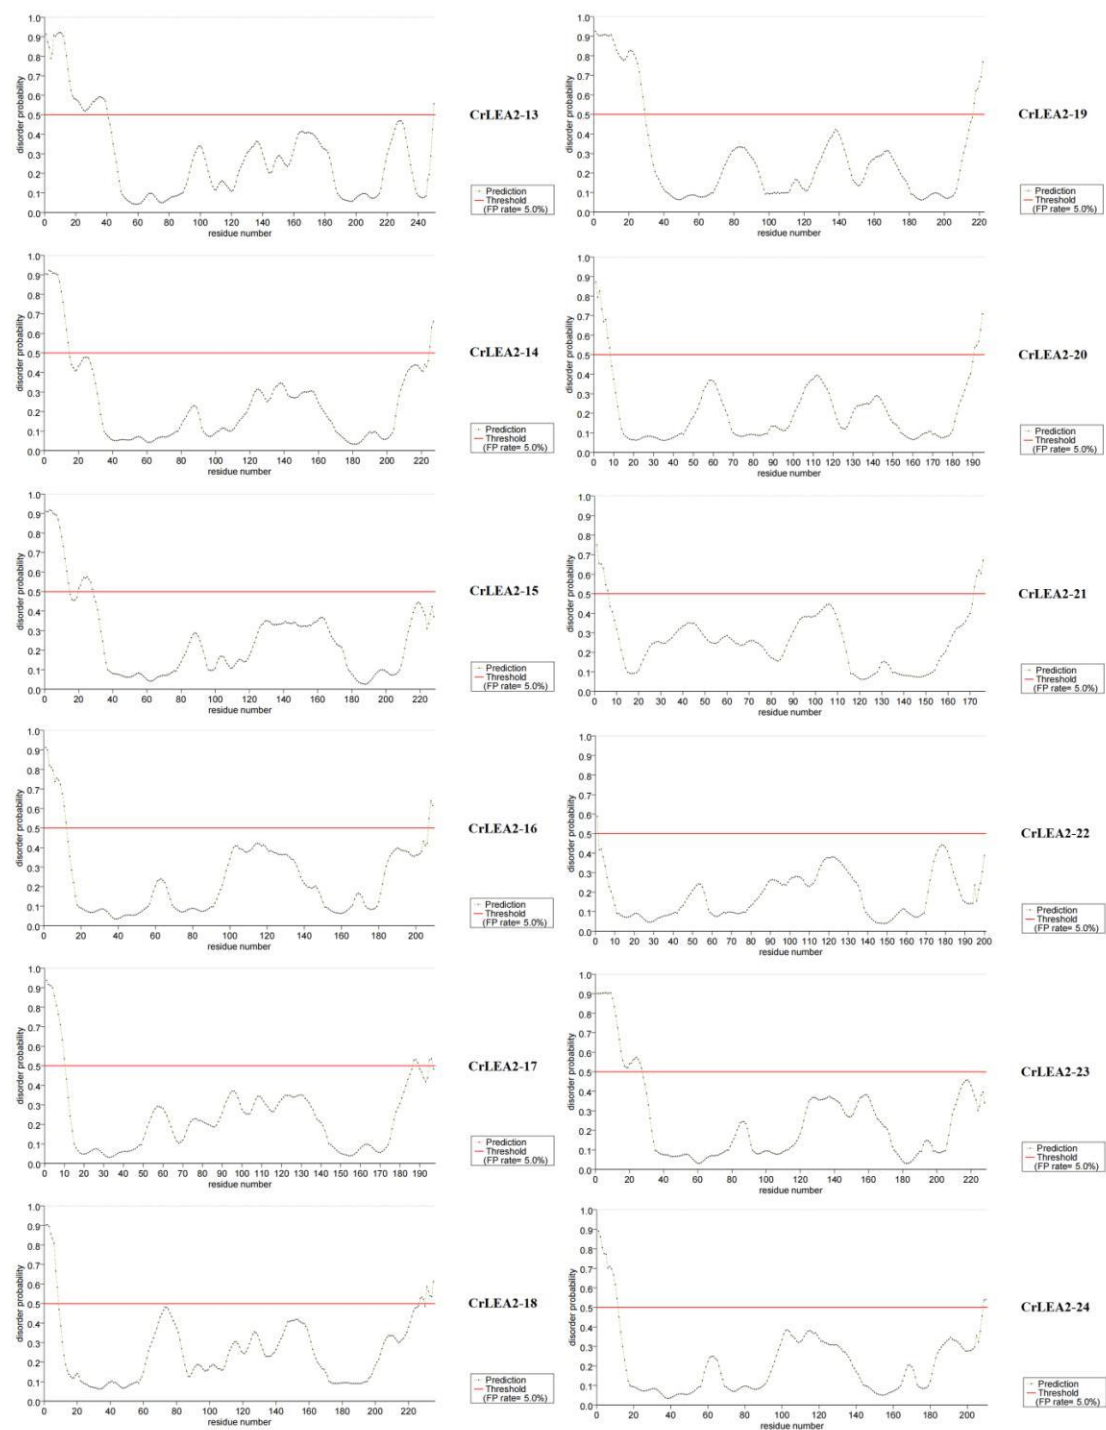

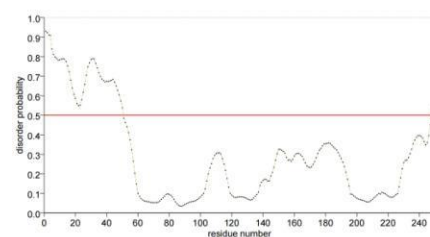

**CrLEA2-25**

- Prediction  
- Threshold  
(FP rate= 5.0%)

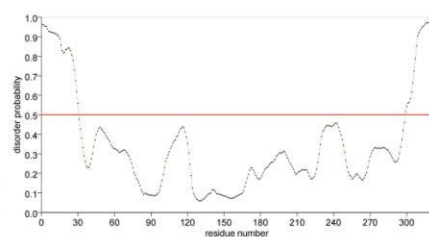

**CrLEA2-31**

- Prediction  
- Threshold  
(FP rate= 5.0%)

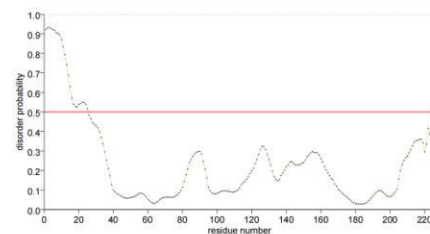

**CrLEA2-26**

- Prediction  
- Threshold  
(FP rate= 5.0%)

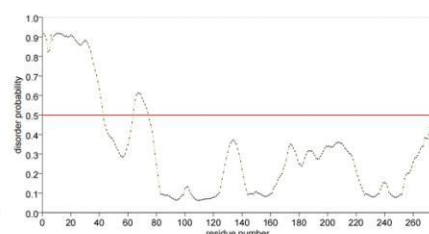

**CrLEA2-32**

- Prediction  
- Threshold  
(FP rate= 5.0%)

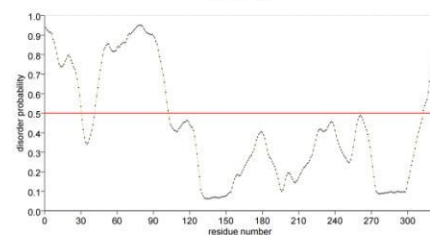

**CrLEA2-27**

- Prediction  
- Threshold  
(FP rate= 5.0%)

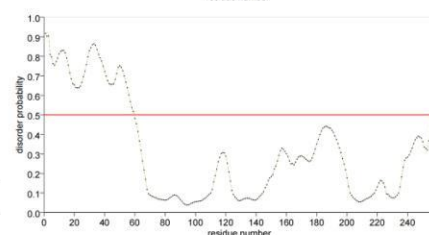

**CrLEA2-33**

- Prediction  
- Threshold  
(FP rate= 5.0%)

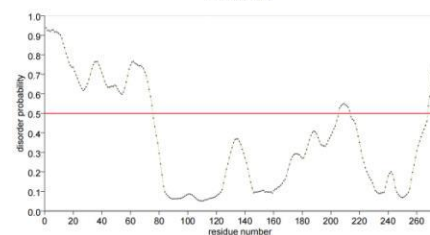

**CrLEA2-28**

- Prediction  
- Threshold  
(FP rate= 5.0%)

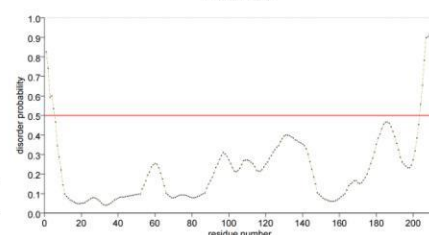

**CrLEA2-34**

- Prediction  
- Threshold  
(FP rate= 5.0%)

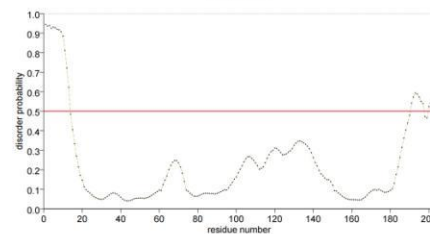

**CrLEA2-29**

- Prediction  
- Threshold  
(FP rate= 5.0%)

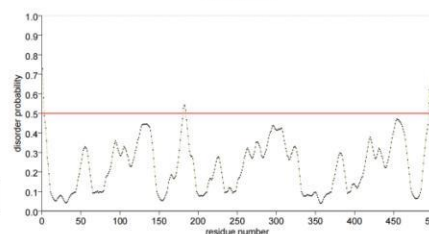

**CrLEA2-35**

- Prediction  
- Threshold  
(FP rate= 5.0%)

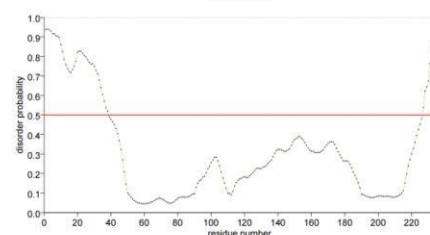

**CrLEA2-30**

- Prediction  
- Threshold  
(FP rate= 5.0%)

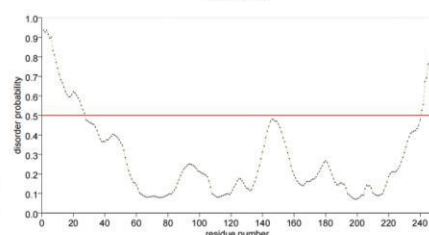

**CrLEA2-36**

- Prediction  
- Threshold  
(FP rate= 5.0%)

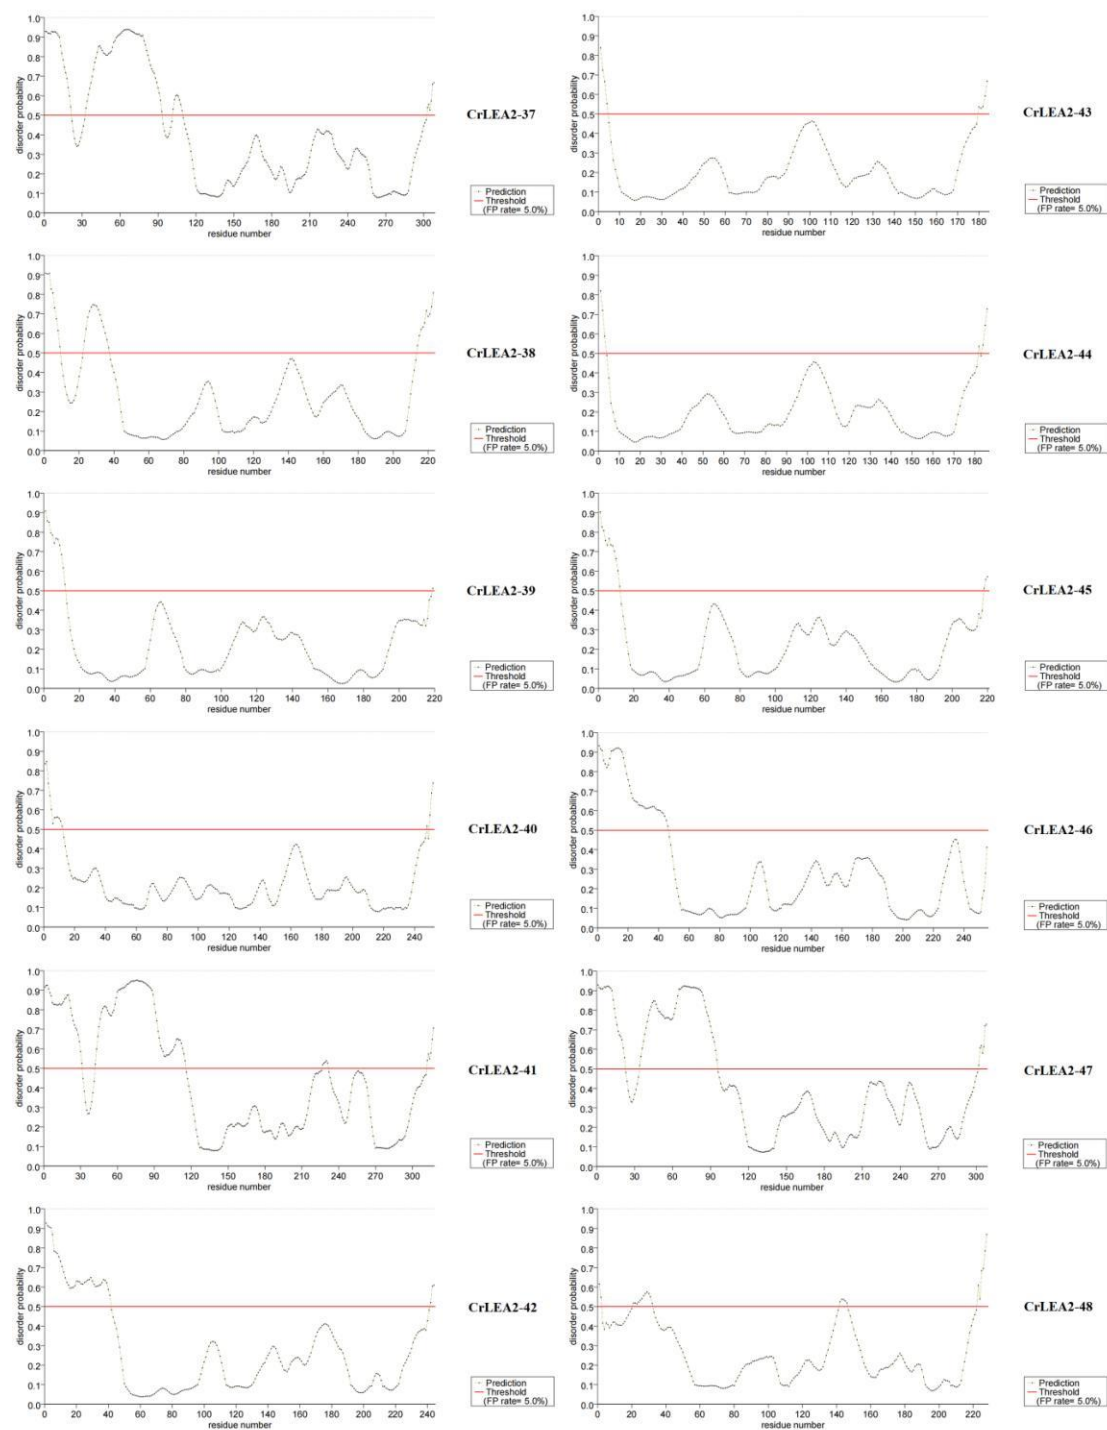

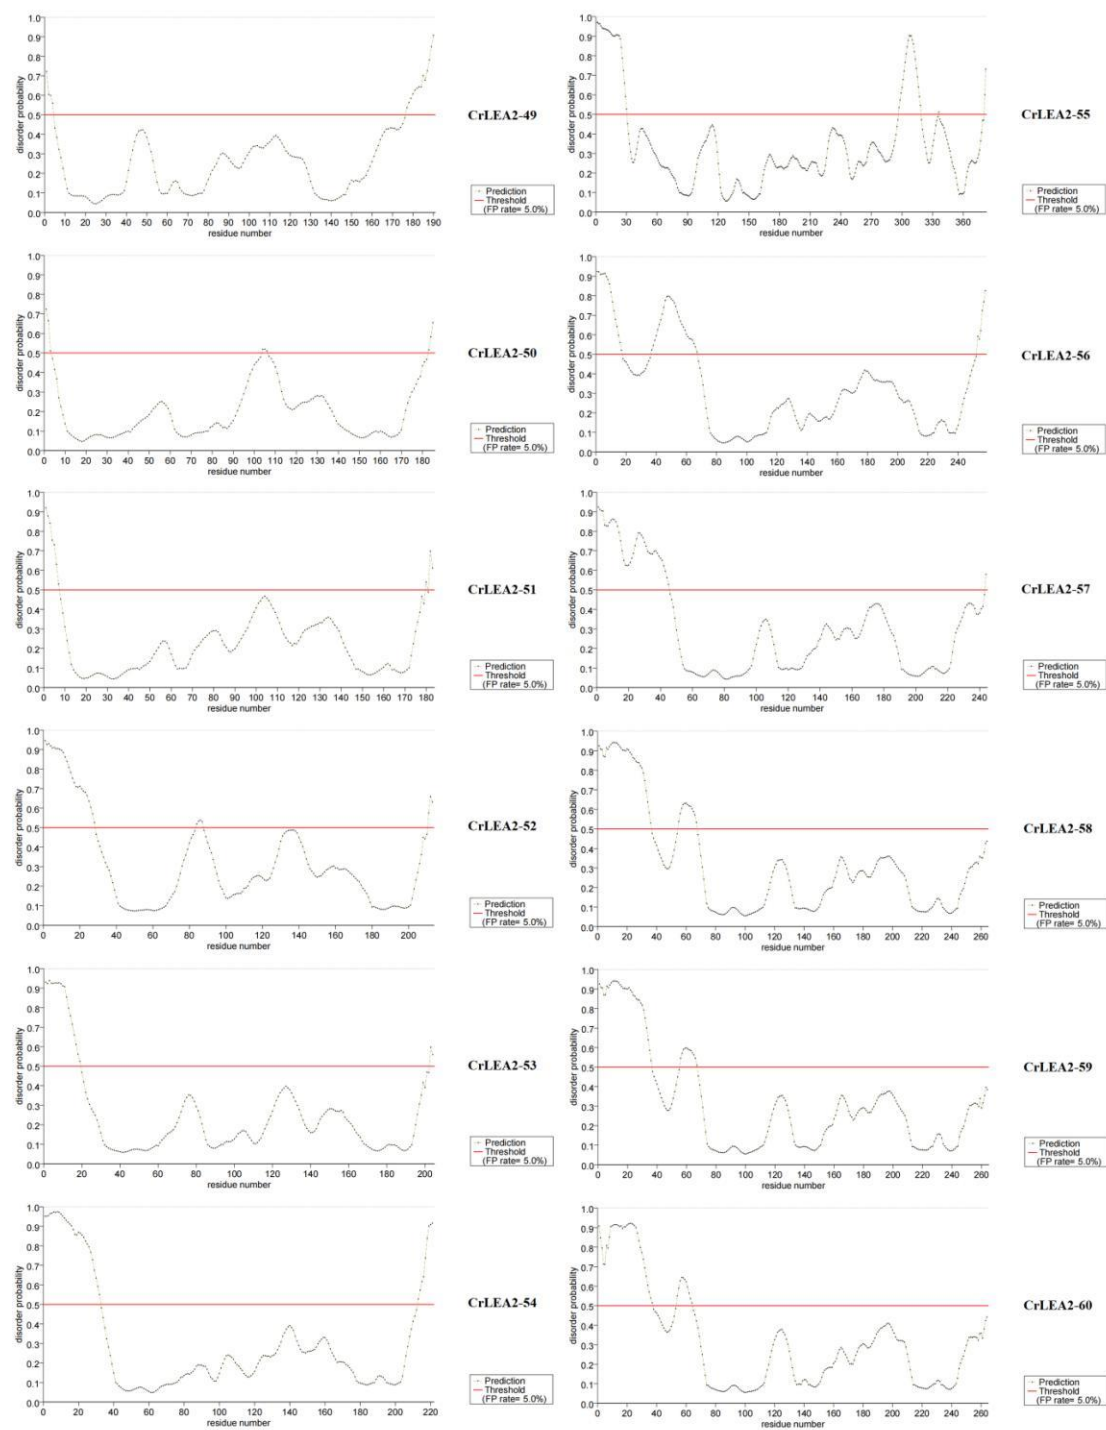



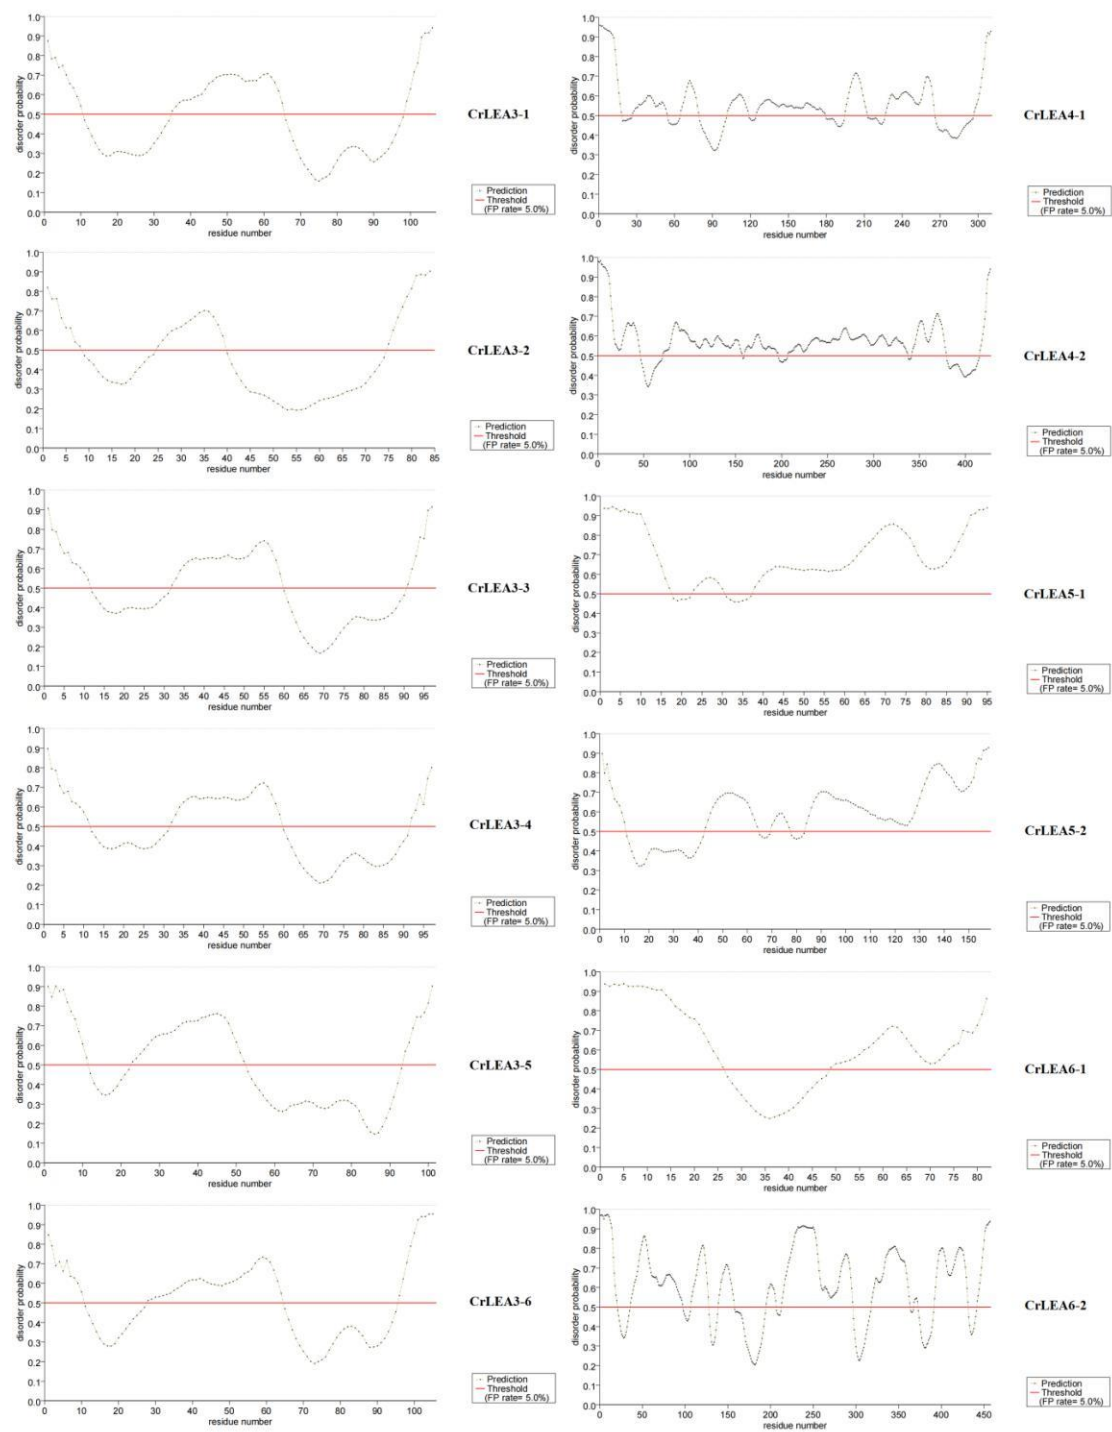



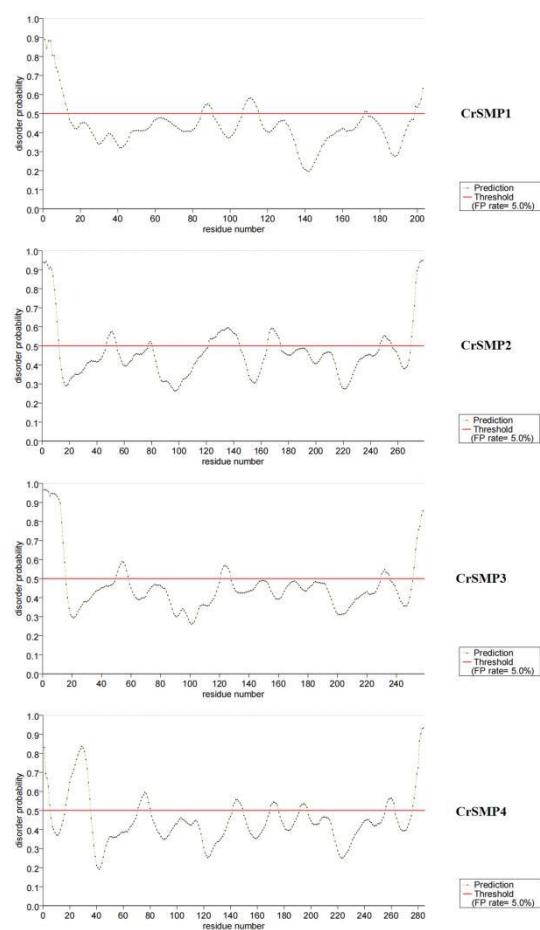

**Figure S2.** Predicted disorder profile plots of CrLEA and CrASR proteins.

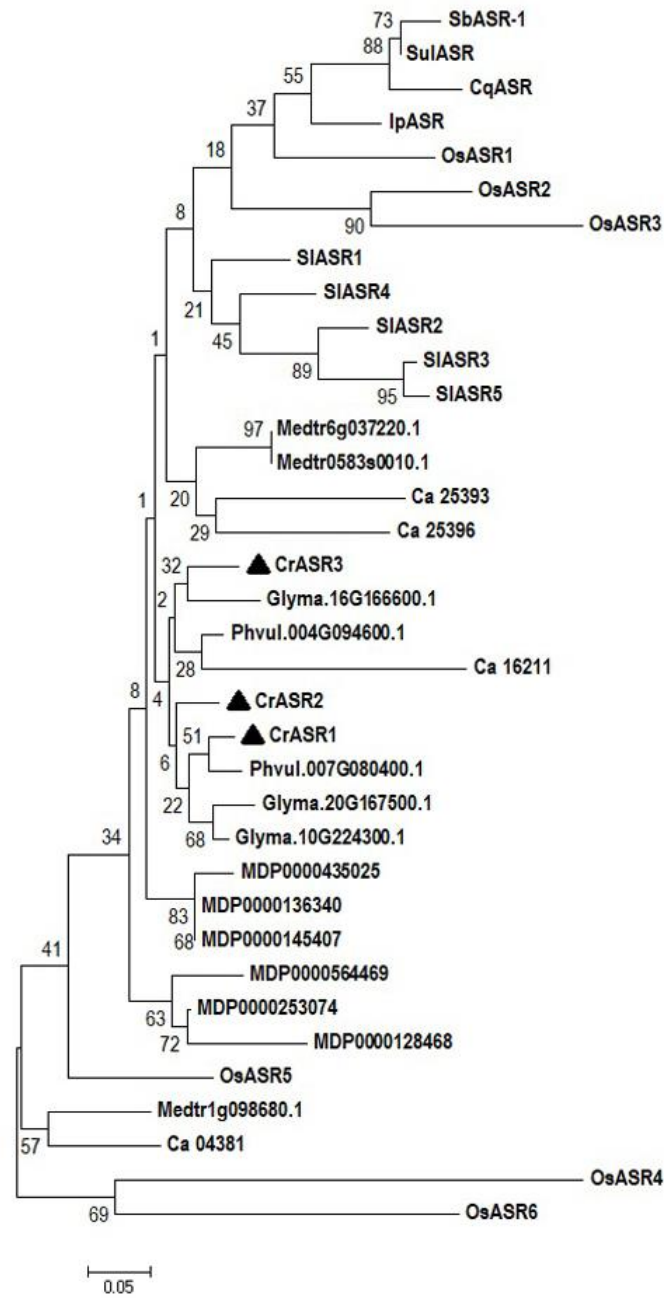

**Figure S3.** Phylogenetic tree of the plant ASR members.
